# Supplementary material for: Computed ligand effects on the oxidative addition of phenyl halides to phosphine supported palladium(0) catalysts
Source: Royal Society of Chemistry journal article supplement (doi:10.1039/c4dt01758g), 2014-01-01
Supplement: c4dt01758g2.pdf [file c4dt01758g2.pdf]

## **Computed Ligand Effects on the Oxidative Addition of Phenyl Halides to Phosphine Supported Palladium(0) Catalysts**

Claire L. McMullin, Natalie Fey and Jeremy N. Harvey

Supporting Information 2 – xyz coordinates of optimised geometries

|                                |            |             |             |                                |             |             |             |
|--------------------------------|------------|-------------|-------------|--------------------------------|-------------|-------------|-------------|
| PhBr                           |            |             |             | H                              | 3.79618300  | -1.50050300 | 1.49445100  |
| Br                             | 0.00000000 | 0.00000000  | 1.81483700  | H                              | 4.47527500  | -2.42879700 | 0.16102800  |
| C                              | 0.00000000 | 1.21722300  | -0.78781500 | H                              | 5.09491600  | -0.34110400 | -1.03023500 |
| C                              | 0.00000000 | 1.20781700  | -2.18469200 | H                              | 5.78122400  | -0.31595100 | 0.59253800  |
| C                              | 0.00000000 | 0.00000000  | -2.88494100 | C                              | -1.04747700 | 3.40516000  | 1.21828200  |
| C                              | 0.00000000 | -1.20781700 | -2.18469200 | C                              | -0.51789800 | 1.97126900  | 1.02248400  |
| C                              | 0.00000000 | -1.21722300 | -0.78781500 | C                              | -0.54796400 | 1.56771300  | -0.46785300 |
| C                              | 0.00000000 | 0.00000000  | -0.10758200 | C                              | -1.97536200 | 1.72653300  | -1.03572300 |
| H                              | 0.00000000 | 2.15274400  | -0.23906400 | C                              | -2.50957800 | 3.15499000  | -0.83767300 |
| H                              | 0.00000000 | 2.15202500  | -2.72241700 | C                              | -2.45982400 | 3.57380700  | 0.63893700  |
| H                              | 0.00000000 | 0.00000000  | -3.97110800 | H                              | -0.36602300 | 4.11249600  | 0.72220500  |
| H                              | 0.00000000 | -2.15202500 | -2.72241700 | H                              | -1.04034800 | 3.66288500  | 2.28564000  |
| H                              | 0.00000000 | -2.15274400 | -0.23906400 | H                              | -1.13449700 | 1.28240200  | 1.61188500  |
| PhCl                           |            |             |             | H                              | 0.49920400  | 1.89933800  | 1.42478600  |
| Cl                             | 0.00000000 | 0.00000000  | 2.26485200  | H                              | 0.07704700  | 2.29894700  | -1.00577100 |
| C                              | 0.00000000 | 1.21625600  | -0.17816600 | H                              | -1.99155300 | 1.46207800  | -2.10059900 |
| C                              | 0.00000000 | 1.20765900  | -1.57472200 | H                              | -2.65038500 | 1.02436000  | -0.52716100 |
| C                              | 0.00000000 | 0.00000000  | -2.27543900 | H                              | -1.90292500 | 3.85235400  | -1.43418200 |
| C                              | 0.00000000 | -1.20765900 | -1.57472200 | H                              | -3.53606300 | 3.22783200  | -1.22034000 |
| C                              | 0.00000000 | -1.21625600 | -0.17816600 | H                              | -3.16192300 | 2.95158100  | 1.21408200  |
| C                              | 0.00000000 | 0.00000000  | 0.50398300  | H                              | -2.79727100 | 4.61201000  | 0.75371500  |
| H                              | 0.00000000 | 2.15002200  | 0.37392100  | C                              | -2.59724900 | -3.21307100 | -0.77508600 |
| H                              | 0.00000000 | 2.15170400  | -2.11264700 | C                              | -1.95250900 | -1.88683900 | -1.21422200 |
| H                              | 0.00000000 | 0.00000000  | -3.36164000 | C                              | -0.76045000 | -1.50826500 | -0.30475300 |
| H                              | 0.00000000 | -2.15170400 | -2.11264700 | C                              | -1.20559500 | -1.45945800 | 1.17021200  |
| H                              | 0.00000000 | -2.15002200 | 0.37392100  | C                              | -1.83890900 | -2.79345500 | 1.60851200  |
| PhI                            |            |             |             | C                              | -3.01703300 | -3.17969900 | 0.70205400  |
| I                              | 0.00000000 | 0.00000000  | 1.56344400  | H                              | -1.87677300 | -4.03066600 | -0.92767400 |
| C                              | 0.00000000 | 1.21648300  | -1.25933700 | H                              | -3.46285700 | -3.43802900 | -1.41194400 |
| C                              | 0.00000000 | 1.20727300  | -2.65682700 | H                              | -2.71194700 | -1.09386800 | -1.18229500 |
| C                              | 0.00000000 | 0.00000000  | -3.35725400 | H                              | -1.61929600 | -1.95550200 | -2.25680400 |
| C                              | 0.00000000 | -1.20727300 | -2.65682700 | H                              | -0.04019400 | -2.33609400 | -0.39708400 |
| C                              | 0.00000000 | -1.21648300 | -1.25933700 | H                              | -0.36080900 | -1.21285700 | 1.82547700  |
| C                              | 0.00000000 | 0.00000000  | -0.57627700 | H                              | -1.94888900 | -0.66170300 | 1.30047700  |
| H                              | 0.00000000 | 2.15618500  | -0.71784600 | H                              | -1.07642100 | -3.58577900 | 1.57091900  |
| H                              | 0.00000000 | 2.15191100  | -3.19408900 | H                              | -2.16804800 | -2.72676100 | 2.65397400  |
| H                              | 0.00000000 | 0.00000000  | -4.44350000 | H                              | -3.82602700 | -2.44505500 | 0.83144100  |
| H                              | 0.00000000 | -2.15191100 | -3.19408900 | H                              | -3.42775500 | -4.15181200 | 1.00409100  |
| H                              | 0.00000000 | -2.15618500 | -0.71784600 | PCy <sub>3</sub> (conformer C) |             |             |             |
| PCy <sub>3</sub> (conformer F) |            |             |             | P                              | 0.15725500  | -0.37076600 | -0.65429000 |
| P                              | 0.22998500 | -0.06783000 | -1.04415800 | C                              | 0.56198000  | 1.45523200  | -0.28657200 |
| C                              | 4.09520900 | 1.02987900  | 0.30980400  | C                              | 0.88076700  | 1.86681000  | 1.16655100  |
| C                              | 2.73482500 | 1.07525800  | -0.40762800 | C                              | 1.10393700  | 3.38562200  | 1.28858600  |
| C                              | 1.83691900 | -0.12808200 | -0.03886300 | C                              | 2.20712400  | 3.87383600  | 0.33898500  |
| C                              | 2.59826700 | -1.44567500 | -0.30924000 | C                              | 1.90997700  | 3.46467000  | -1.11088600 |
| C                              | 3.95938600 | -1.49120200 | 0.40638100  | C                              | 1.67681400  | 1.95006200  | -1.23789600 |
| C                              | 4.83477600 | -0.28639400 | 0.03731400  | C                              | -1.69478500 | -0.48736900 | -0.26725200 |
| H                              | 3.93798600 | 1.13996900  | 1.39325000  | C                              | -2.50754400 | 0.17185100  | -1.40492700 |
| H                              | 4.70795700 | 1.88521100  | -0.00394100 | C                              | -4.01832300 | -0.06999000 | -1.24093200 |
| H                              | 2.23163400 | 2.02021700  | -0.17186900 | C                              | -4.52260800 | 0.38425000  | 0.13690400  |
| H                              | 2.90015900 | 1.07476100  | -1.49536900 | C                              | -3.71380900 | -0.26753100 | 1.26793500  |
| H                              | 1.61582100 | -0.07677300 | 1.03790300  | C                              | -2.20566500 | -0.00344300 | 1.10407500  |
| H                              | 2.00125000 | -2.30973800 | 0.00508800  | C                              | 0.95141800  | -1.31040200 | 0.79585500  |
| H                              | 2.75437200 | -1.55280400 | -1.39294200 | C                              | 2.49249800  | -1.36359100 | 0.63864200  |
|                                |            |             |             | C                              | 2.95625400  | -2.29325600 | -0.49587300 |
|                                |            |             |             | C                              | 2.38727800  | -3.71109200 | -0.33342900 |

|   |             |             |             |
|---|-------------|-------------|-------------|
| C | 0.85676500  | -3.68598600 | -0.20108700 |
| C | 0.41462600  | -2.75456100 | 0.93971000  |
| H | -0.35812900 | 1.98331500  | -0.58153300 |
| H | 1.79055200  | 1.35281800  | 1.50504600  |
| H | 0.07909100  | 1.55619900  | 1.84524300  |
| H | 0.16519800  | 3.90946700  | 1.05372800  |
| H | 1.35276400  | 3.64296000  | 2.32673300  |
| H | 3.16848200  | 3.43733100  | 0.64874100  |
| H | 2.32055800  | 4.96312500  | 0.41359300  |
| H | 1.01129400  | 3.99618600  | -1.45864400 |
| H | 2.73008100  | 3.77500400  | -1.77160300 |
| H | 2.61430300  | 1.42091700  | -1.01095200 |
| H | 1.42394100  | 1.69145400  | -2.27304000 |
| H | -1.89359400 | -1.56828100 | -0.33458900 |
| H | -2.16688900 | -0.20970200 | -2.37527600 |
| H | -2.32141900 | 1.25623200  | -1.41395500 |
| H | -4.56871200 | 0.44778600  | -2.03742000 |
| H | -4.22480200 | -1.14329800 | -1.36617200 |
| H | -5.58980400 | 0.15264400  | 0.24789400  |
| H | -4.43070400 | 1.47822000  | 0.21287600  |
| H | -4.05544900 | 0.10138900  | 2.24409400  |
| H | -3.89326200 | -1.35306500 | 1.26362500  |
| H | -1.65365100 | -0.48613100 | 1.92015900  |
| H | -2.02810800 | 1.07693700  | 1.19882000  |
| H | 0.72046700  | -0.77476200 | 1.72459700  |
| H | 2.91419800  | -1.72851300 | 1.58821700  |
| H | 2.90702800  | -0.35918000 | 0.48975600  |
| H | 2.63204100  | -1.88174800 | -1.46028400 |
| H | 4.05342500  | -2.32495500 | -0.51794800 |
| H | 2.81864800  | -4.17461100 | 0.56700500  |
| H | 2.68632300  | -4.33968800 | -1.18209800 |
| H | 0.41581900  | -3.34898300 | -1.14900400 |
| H | 0.47418800  | -4.69876400 | -0.01879500 |
| H | 0.80418100  | -3.15815800 | 1.88744300  |
| H | -0.67710400 | -2.76132200 | 1.03775200  |

#### PH<sub>3</sub>

|   |             |             |             |
|---|-------------|-------------|-------------|
| P | 0.00000000  | 0.00000000  | 0.12867600  |
| H | 0.00000000  | 1.19674600  | -0.64337800 |
| H | 1.03641300  | -0.59837300 | -0.64337800 |
| H | -1.03641300 | -0.59837300 | -0.64337800 |

#### PPh<sub>3</sub>

|   |             |             |             |
|---|-------------|-------------|-------------|
| P | -0.00106600 | -0.00107600 | -1.20502500 |
| C | 1.13203300  | 4.12871200  | 0.64834400  |
| C | 0.14858600  | 3.36111000  | 1.27506900  |
| C | -0.20894800 | 2.11437700  | 0.75630200  |
| C | 0.40966400  | 1.61795100  | -0.40156500 |
| C | 1.38873500  | 2.40702200  | -1.02984200 |
| C | 1.75420600  | 3.64708600  | -0.50575300 |
| H | 1.40754100  | 5.09917000  | 1.05284200  |
| H | -0.34277700 | 3.73192700  | 2.17112700  |
| H | -0.97502200 | 1.52654400  | 1.25289400  |
| H | 1.86403300  | 2.04736800  | -1.93971600 |
| H | 2.51569100  | 4.24149900  | -1.00403800 |
| C | -4.14408100 | -1.08539600 | 0.64955800  |
| C | -2.98702700 | -1.54654000 | 1.28030500  |

|   |             |             |             |
|---|-------------|-------------|-------------|
| C | -1.72882300 | -1.23301400 | 0.76096200  |
| C | -1.60877500 | -0.45517300 | -0.40127500 |
| C | -2.78210000 | -0.00828100 | -1.03309200 |
| C | -4.03866100 | -0.31198300 | -0.50870700 |
| H | -5.12210700 | -1.33198200 | 1.05445700  |
| H | -3.06194000 | -2.15197000 | 2.18015000  |
| H | -0.83677400 | -1.59777000 | 1.26122200  |
| H | -2.70902900 | 0.57875000  | -1.94589000 |
| H | -4.93443500 | 0.04535600  | -1.01007400 |
| C | 3.01436200  | -3.04093300 | 0.65128900  |
| C | 2.83312000  | -1.80813000 | 1.28086100  |
| C | 1.93047600  | -0.87753100 | 0.76075600  |
| C | 1.19691500  | -1.16489700 | -0.40086000 |
| C | 1.39942500  | -2.40434100 | -1.03224200 |
| C | 2.29244500  | -3.33851500 | -0.50689900 |
| H | 3.71855400  | -3.76286400 | 1.05651300  |
| H | 3.39505100  | -1.56809500 | 2.18002900  |
| H | 1.79935200  | 0.07814900  | 1.25939200  |
| H | 0.85563000  | -2.63603800 | -1.94532800 |
| H | 2.43291400  | -4.29306000 | -1.00747600 |

#### SPhos (conformer a)

|   |             |             |             |
|---|-------------|-------------|-------------|
| P | 0.83048800  | 0.11026200  | -0.49359600 |
| O | -3.45916100 | 0.63096200  | 0.39708800  |
| O | -0.55998500 | -3.01347000 | -0.16419400 |
| C | -1.23004500 | -0.74486300 | 1.27044800  |
| C | 0.05124000  | -0.15021600 | 1.18429700  |
| C | 0.69901000  | 0.19960500  | 2.38305800  |
| H | 1.68626200  | 0.64911500  | 2.34776800  |
| C | -1.15661600 | -0.58914000 | 3.70384500  |
| H | -1.62834500 | -0.76250800 | 4.66771300  |
| C | -2.01021300 | -1.18727600 | 0.07068200  |
| C | -1.81515200 | -0.94657200 | 2.53067200  |
| H | -2.80109300 | -1.40008800 | 2.58003200  |
| C | -0.75788100 | 2.35592800  | -1.12102400 |
| H | -1.09550600 | 1.72594000  | -1.95335500 |
| H | -1.42129700 | 2.13353600  | -0.27459400 |
| C | -1.66314600 | -2.35877600 | -0.62958100 |
| C | -3.16168300 | -0.48646500 | -0.33596700 |
| C | -3.92936200 | -0.91992800 | -1.42583800 |
| H | -4.80852500 | -0.37332900 | -1.74450300 |
| C | 0.69326000  | 1.98975300  | -0.74253100 |
| H | 1.31239600  | 2.16119700  | -1.63759600 |
| C | -4.61337300 | 1.37803700  | 0.05377300  |
| H | -4.54428800 | 1.78801800  | -0.96250200 |
| H | -4.65970300 | 2.19991600  | 0.77090400  |
| H | -5.52642300 | 0.77352800  | 0.13633400  |
| C | 2.66954200  | -0.11668700 | -0.11223400 |
| H | 2.98298100  | 0.54713400  | 0.70631000  |
| C | 0.11213300  | -0.01485600 | 3.62944800  |
| H | 0.64353400  | 0.26719900  | 4.53506400  |
| C | -3.54673500 | -2.07423500 | -2.10480100 |
| H | -4.13810900 | -2.41519200 | -2.95049400 |
| C | 1.21027300  | 2.91436300  | 0.37509500  |
| H | 2.25912700  | 2.69128500  | 0.60929800  |
| H | 0.63643000  | 2.72869700  | 1.29267800  |
| C | -2.42335700 | -2.80234700 | -1.72008300 |

|   |             |             |             |
|---|-------------|-------------|-------------|
| H | -2.15137600 | -3.70012300 | -2.26123900 |
| C | 2.94478800  | -1.57406200 | 0.31792400  |
| H | 2.36718200  | -1.82008500 | 1.21580100  |
| H | 2.59046300  | -2.24987800 | -0.47439100 |
| C | -0.12261600 | -4.17380300 | -0.85016400 |
| H | -0.87901100 | -4.96967000 | -0.82208700 |
| H | 0.77265400  | -4.51010800 | -0.32387300 |
| H | 0.13173400  | -3.95311800 | -1.89487400 |
| C | -0.36818000 | 4.75864600  | -0.38217900 |
| H | -1.00811700 | 4.64960700  | 0.50612100  |
| H | -0.43362900 | 5.81084800  | -0.68894000 |
| C | 1.07686000  | 4.40028900  | -0.00741700 |
| H | 1.42406000  | 5.03122900  | 0.82171100  |
| H | 1.73650200  | 4.61646400  | -0.86130100 |
| C | 3.52173200  | 0.23584100  | -1.35101400 |
| H | 3.37525900  | 1.28476600  | -1.63550200 |
| H | 3.18260000  | -0.36947600 | -2.20470800 |
| C | -0.89182500 | 3.84166900  | -1.49687200 |
| H | -0.32427100 | 4.03532300  | -2.41969900 |
| H | -1.94068500 | 4.07709300  | -1.72258000 |
| C | 4.44108000  | -1.82732600 | 0.56600000  |
| H | 4.77369900  | -1.22616800 | 1.42549100  |
| H | 4.60065300  | -2.87805000 | 0.84235600  |
| C | 5.28682000  | -1.46462300 | -0.66281000 |
| H | 6.35438000  | -1.60682500 | -0.44997000 |
| H | 5.03776900  | -2.14916300 | -1.48754500 |
| C | 5.01983100  | -0.01993400 | -1.10860500 |
| H | 5.58803400  | 0.21041300  | -2.01950200 |
| H | 5.38221600  | 0.67049000  | -0.33228200 |

SPhos (conformer c)

|   |             |             |             |
|---|-------------|-------------|-------------|
| P | -0.85543000 | 0.78911500  | -1.49062900 |
| O | 2.91465300  | -1.26329400 | -1.13644900 |
| O | -0.35174800 | -1.60302500 | 2.20619900  |
| C | -0.52424900 | -1.05298000 | -1.34017400 |
| C | 0.30652700  | -1.83008100 | -0.49147100 |
| C | 1.26961400  | -1.30772900 | 0.53555000  |
| C | 2.61166100  | -1.06328000 | 0.18135600  |
| C | 3.55448800  | -0.65334900 | 1.13493700  |
| H | 4.58037900  | -0.44931300 | 0.85397000  |
| C | 3.15777100  | -0.51832900 | 2.46344500  |
| H | 3.88234900  | -0.19511300 | 3.20605300  |
| C | 1.85493900  | -0.80772400 | 2.86108300  |
| H | 1.57874800  | -0.72326700 | 3.90486700  |
| C | 0.92430000  | -1.22716300 | 1.89852000  |
| C | 0.30185400  | -3.23039000 | -0.62413200 |
| H | 0.94759000  | -3.80759100 | 0.03242300  |
| C | -0.48987800 | -3.88884700 | -1.55945700 |
| H | -0.46709100 | -4.97338300 | -1.62743700 |
| C | -1.28839800 | -3.13551200 | -2.41694600 |
| H | -1.89868200 | -3.61825500 | -3.17595500 |
| C | -1.28198400 | -1.74748700 | -2.30974200 |
| H | -1.87722900 | -1.16875000 | -3.01125000 |
| C | -0.75721400 | -1.58454600 | 3.56447400  |
| H | -0.13801700 | -2.25149500 | 4.17863700  |
| H | -1.78864500 | -1.94149500 | 3.57125400  |
| H | -0.72338200 | -0.57109500 | 3.98540900  |

|   |             |             |             |
|---|-------------|-------------|-------------|
| C | 4.26243200  | -1.11617700 | -1.55408800 |
| H | 4.61749900  | -0.08564900 | -1.42418600 |
| H | 4.27181100  | -1.36826600 | -2.61601900 |
| H | 4.92810500  | -1.79997900 | -1.01138500 |
| C | 0.45751100  | 1.75912300  | -0.53773700 |
| H | 0.74704700  | 1.23928200  | 0.38209400  |
| C | -0.05457200 | 3.16687300  | -0.15651300 |
| H | -0.42559900 | 3.67864900  | -1.05787000 |
| H | -0.89965400 | 3.10039000  | 0.53715800  |
| C | 1.05207700  | 4.01994000  | 0.48993200  |
| H | 0.65935900  | 5.01905600  | 0.72137000  |
| H | 1.33700700  | 3.56618200  | 1.45071200  |
| C | 2.29497200  | 4.12880300  | -0.40365200 |
| H | 2.03862300  | 4.69170300  | -1.31354800 |
| H | 3.08168700  | 4.69998100  | 0.10667800  |
| C | 2.80838300  | 2.73744900  | -0.79921800 |
| H | 3.18030900  | 2.21776100  | 0.09537700  |
| H | 3.65968400  | 2.82948600  | -1.48782000 |
| C | 1.69802700  | 1.89746800  | -1.45137200 |
| H | 2.07878900  | 0.90886900  | -1.72444000 |
| H | 1.38656600  | 2.38038400  | -2.38920900 |
| C | -2.43256000 | 1.03075600  | -0.45957000 |
| H | -2.56349200 | 2.12308900  | -0.49844000 |
| C | -3.65939800 | 0.41922200  | -1.16958100 |
| H | -3.69992800 | 0.75932700  | -2.21222200 |
| H | -3.55804800 | -0.67421300 | -1.19735800 |
| C | -4.96822000 | 0.78116700  | -0.44657100 |
| H | -5.12951600 | 1.86775900  | -0.51151400 |
| H | -5.81869600 | 0.30894400  | -0.95593500 |
| C | -4.93231700 | 0.36216600  | 1.03035900  |
| H | -4.88837000 | -0.73547400 | 1.09215400  |
| H | -5.85687100 | 0.66813000  | 1.53736600  |
| C | -3.70866700 | 0.95569800  | 1.74294200  |
| H | -3.81340100 | 2.05045200  | 1.78838200  |
| H | -3.66738600 | 0.60551500  | 2.78358100  |
| C | -2.39899900 | 0.59867500  | 1.01563700  |
| H | -2.23098300 | -0.48289300 | 1.06643100  |
| H | -1.55097000 | 1.06262200  | 1.53402700  |

1<sub>Cy</sub> [Pd(PCy<sub>3</sub>)] (conformer F)

|    |             |             |             |
|----|-------------|-------------|-------------|
| Pd | -0.61911200 | -0.26538000 | 2.46435900  |
| P  | -0.13133100 | -0.03837600 | 0.30135800  |
| C  | -3.79581100 | 1.25025800  | -1.40575000 |
| C  | -2.55121800 | 1.20427300  | -0.50317300 |
| C  | -1.63709800 | 0.00542900  | -0.83995400 |
| C  | -2.44670900 | -1.30823100 | -0.77410300 |
| C  | -3.69295500 | -1.26022800 | -1.67496500 |
| C  | -4.59068100 | -0.06096100 | -1.34283400 |
| H  | -3.48546100 | 1.43688600  | -2.44496700 |
| H  | -4.43045100 | 2.09704000  | -1.11386400 |
| H  | -2.00315100 | 2.14929800  | -0.59393400 |
| H  | -2.86003800 | 1.12313900  | 0.54872600  |
| H  | -1.27250100 | 0.12890000  | -1.87035700 |
| H  | -1.82603200 | -2.16253400 | -1.06847400 |
| H  | -2.74869900 | -1.48460900 | 0.26810700  |
| H  | -3.37769900 | -1.19610600 | -2.72731500 |
| H  | -4.25419000 | -2.19825200 | -1.57494000 |

|   |             |             |             |
|---|-------------|-------------|-------------|
| H | -5.00304700 | -0.18619000 | -0.33078900 |
| H | -5.44707300 | -0.02255300 | -2.02830500 |
| C | 1.40041500  | 3.49363900  | -1.64119300 |
| C | 0.86570400  | 2.05169600  | -1.55169200 |
| C | 0.73538200  | 1.60618600  | -0.07901000 |
| C | 2.09357000  | 1.73918500  | 0.64223100  |
| C | 2.63236400  | 3.17731900  | 0.55111500  |
| C | 2.73903100  | 3.65126600  | -0.90587300 |
| H | 0.66114500  | 4.17904000  | -1.20058300 |
| H | 1.50633900  | 3.78463300  | -2.69447000 |
| H | 1.55212100  | 1.38497500  | -2.08702500 |
| H | -0.09780800 | 1.99212300  | -2.06998800 |
| H | 0.05306100  | 2.31420300  | 0.41464600  |
| H | 1.98962800  | 1.43483200  | 1.69080000  |
| H | 2.82373100  | 1.05870100  | 0.18267000  |
| H | 1.95904800  | 3.84876600  | 1.10427000  |
| H | 3.61059100  | 3.23978400  | 1.04511800  |
| H | 3.50708700  | 3.05740300  | -1.42390200 |
| H | 3.07389800  | 4.69577500  | -0.94464700 |
| C | 2.67131300  | -3.22213900 | 0.10345000  |
| C | 2.04551700  | -1.88850300 | 0.54660700  |
| C | 0.87815500  | -1.48679300 | -0.38095300 |
| C | 1.35636800  | -1.41631000 | -1.84635300 |
| C | 1.97215000  | -2.75707800 | -2.28937600 |
| C | 3.12214300  | -3.18111200 | -1.36435900 |
| H | 1.93178300  | -4.02651000 | 0.23300700  |
| H | 3.51897400  | -3.47016300 | 0.75518600  |
| H | 2.81828800  | -1.10847000 | 0.53383000  |
| H | 1.68470600  | -1.95722200 | 1.57985600  |
| H | 0.14413600  | -2.30348700 | -0.31430800 |
| H | 0.53358900  | -1.14508900 | -2.51906500 |
| H | 2.11851600  | -0.63266500 | -1.94630000 |
| H | 1.19235000  | -3.53298900 | -2.28081100 |
| H | 2.32419000  | -2.67960800 | -3.32637200 |
| H | 3.95068700  | -2.46452300 | -1.46856000 |
| H | 3.51556400  | -4.15878800 | -1.67103200 |

# **1<sub>Cy</sub> [Pd(PCy<sub>3</sub>)] (conformer C)**

|    |             |             |             |
|----|-------------|-------------|-------------|
| Pd | -1.27736100 | -0.54783700 | 1.88357800  |
| P  | -0.08539100 | -0.09793800 | 0.04718200  |
| C  | 0.72657200  | 1.62319200  | 0.02551400  |
| C  | 1.03571400  | 2.24409400  | -1.35500100 |
| C  | 1.81532900  | 3.56445800  | -1.20869900 |
| C  | 1.06373600  | 4.57229200  | -0.32786500 |
| C  | 0.71789900  | 3.96299700  | 1.03841400  |
| C  | -0.04896200 | 2.63739600  | 0.89581900  |
| C  | 1.37072200  | -1.29269800 | -0.15593300 |
| C  | 2.20814900  | -1.37623700 | 1.13834500  |
| C  | 3.27093300  | -2.48483900 | 1.04963500  |
| C  | 4.17504200  | -2.31313500 | -0.17966800 |
| C  | 3.34636900  | -2.21338800 | -1.46824300 |
| C  | 2.29241200  | -1.09382900 | -1.37719300 |
| C  | -0.97935800 | -0.21730100 | -1.62148100 |
| C  | -2.22590300 | 0.70267700  | -1.69971800 |
| C  | -3.46162600 | 0.14682900  | -0.97354900 |
| C  | -3.80692900 | -1.27298100 | -1.44386800 |
| C  | -2.59901700 | -2.20785400 | -1.28765200 |

|   |             |             |             |
|---|-------------|-------------|-------------|
| C | -1.37227000 | -1.65827800 | -2.03264700 |
| H | 1.68721500  | 1.43978800  | 0.53123400  |
| H | 0.09621700  | 2.44947700  | -1.88516800 |
| H | 1.60404300  | 1.55152600  | -1.98391200 |
| H | 2.80001900  | 3.35546400  | -0.76466000 |
| H | 2.00609400  | 3.99200700  | -2.20180900 |
| H | 0.13491000  | 4.87181400  | -0.83581300 |
| H | 1.65909400  | 5.48563100  | -0.20122600 |
| H | 1.64684900  | 3.78228600  | 1.60001300  |
| H | 0.12744200  | 4.67142200  | 1.63362200  |
| H | -1.03202700 | 2.83295400  | 0.44312900  |
| H | -0.24928000 | 2.19917200  | 1.88038400  |
| H | 0.86905600  | -2.26511400 | -0.26588100 |
| H | 1.54349000  | -1.54837400 | 1.99335500  |
| H | 2.70982500  | -0.41380000 | 1.31920600  |
| H | 3.87298000  | -2.49636700 | 1.96734700  |
| H | 2.76619000  | -3.46086900 | 0.99487300  |
| H | 4.88842400  | -3.14436500 | -0.24867700 |
| H | 4.77282000  | -1.39659000 | -0.06398100 |
| H | 4.00092500  | -2.03734700 | -2.33180300 |
| H | 2.83952500  | -3.17258800 | -1.65063800 |
| H | 1.71227200  | -1.05785400 | -2.30707500 |
| H | 2.81281300  | -0.13034500 | -1.29083800 |
| H | -0.25523200 | 0.14561700  | -2.36095800 |
| H | -2.47073500 | 0.82697100  | -2.76597700 |
| H | -1.99432500 | 1.70544700  | -1.32246900 |
| H | -3.26457000 | 0.12803800  | 0.10820400  |
| H | -4.31128900 | 0.82315600  | -1.13566000 |
| H | -4.11353600 | -1.24646300 | -2.50116700 |
| H | -4.66404800 | -1.66089700 | -0.87866500 |
| H | -2.36287200 | -2.31523300 | -0.21976000 |
| H | -2.83715000 | -3.20973800 | -1.66842100 |
| H | -1.60436600 | -1.63128100 | -3.10876400 |
| H | -0.52418800 | -2.34432400 | -1.92760800 |

# **1<sub>H</sub> [Pd(PH<sub>3</sub>)]**

|    |             |             |             |
|----|-------------|-------------|-------------|
| Pd | 0.00000000  | 0.00000000  | 0.65047900  |
| P  | 0.00000000  | 0.00000000  | -1.54122900 |
| H  | 0.00000000  | 1.21878600  | -2.26786900 |
| H  | 1.05549900  | -0.60939300 | -2.26786900 |
| H  | -1.05549900 | -0.60939300 | -2.26786900 |

# **1<sub>Ph</sub> [Pd(PPh<sub>3</sub>)]**

|    |             |             |             |
|----|-------------|-------------|-------------|
| Pd | -0.00591600 | -0.00640000 | 2.57430300  |
| P  | -0.00109700 | -0.00159900 | 0.35917700  |
| C  | 3.16354400  | -2.85358000 | -1.53612700 |
| C  | 1.92209200  | -2.70907100 | -2.15717800 |
| C  | 0.95502700  | -1.86203500 | -1.60959500 |
| C  | 1.21840000  | -1.15247000 | -0.42803000 |
| C  | 2.46702300  | -1.31416100 | 0.19465800  |
| C  | 3.43497300  | -2.15156400 | -0.35891000 |
| H  | 3.91316900  | -3.51500200 | -1.96246600 |
| H  | 1.70158100  | -3.25692700 | -3.06976200 |
| H  | -0.00680600 | -1.75914800 | -2.10246900 |
| H  | 2.66797600  | -0.78663800 | 1.12401900  |
| H  | 4.39629300  | -2.26524300 | 0.13528300  |
| C  | -4.05373500 | -1.30008100 | -1.54803100 |

|   |             |             |             |
|---|-------------|-------------|-------------|
| C | -3.30350800 | -0.29771900 | -2.16456500 |
| C | -2.08622200 | 0.11086400  | -1.61335800 |
| C | -1.60714400 | -0.47686800 | -0.43265000 |
| C | -2.37592900 | -1.47678300 | 0.18546600  |
| C | -3.58531800 | -1.89106700 | -0.37175100 |
| H | -5.00151100 | -1.61445200 | -1.97706000 |
| H | -3.66437500 | 0.17109500  | -3.07647500 |
| H | -1.51365300 | 0.89269700  | -2.10281900 |
| H | -2.02292500 | -1.91860100 | 1.11423400  |
| H | -4.16763000 | -2.66645900 | 0.11914300  |
| C | 0.90144100  | 4.16689900  | -1.52667500 |
| C | 1.40171100  | 3.01989200  | -2.14439100 |
| C | 1.14699500  | 1.75854300  | -1.59965000 |
| C | 0.39123000  | 1.63099400  | -0.42416600 |
| C | -0.09774800 | 2.79295900  | 0.19536500  |
| C | 0.14833600  | 4.05017800  | -0.35546500 |
| H | 1.10309100  | 5.14708900  | -1.95063000 |
| H | 1.99378200  | 3.10319100  | -3.05219200 |
| H | 1.54308400  | 0.87474400  | -2.09033700 |
| H | -0.66283000 | 2.70316700  | 1.12003600  |
| H | -0.23767300 | 4.93929500  | 0.13621300  |

# **I<sub>SP</sub> [Pd(SPhos)] (conformer a)**

|    |             |             |             |
|----|-------------|-------------|-------------|
| Pd | -0.31526100 | -1.22143700 | -1.46670500 |
| P  | 0.89769500  | 0.26068900  | -0.20643500 |
| O  | -3.45573800 | 1.07219300  | 0.64350900  |
| O  | -0.95066000 | -2.87215900 | 0.92048400  |
| C  | -1.22403600 | -0.21151400 | 1.70905800  |
| C  | 0.09488000  | 0.27813500  | 1.49309800  |
| C  | 0.79576100  | 0.79290800  | 2.59820200  |
| H  | 1.80571000  | 1.16718900  | 2.46794300  |
| C  | -1.06415800 | 0.38050700  | 4.07287500  |
| H  | -1.51819500 | 0.41615800  | 5.05976700  |
| C  | -2.05045100 | -0.80352300 | 0.61300400  |
| C  | -1.77709400 | -0.14054100 | 2.99597600  |
| H  | -2.78665300 | -0.51217700 | 3.14432700  |
| C  | -0.58369300 | 2.49916500  | -1.09564000 |
| H  | -1.01466800 | 1.77927200  | -1.80246100 |
| H  | -1.20800300 | 2.46089000  | -0.19251400 |
| C  | -1.67637700 | -2.07623500 | 0.06691000  |
| C  | -3.14046600 | -0.12754000 | 0.05869900  |
| C  | -3.82060700 | -0.63528600 | -1.07282200 |
| H  | -4.66193300 | -0.10397100 | -1.49969900 |
| C  | 0.85781500  | 2.07638300  | -0.74255500 |
| H  | 1.43207800  | 2.06199700  | -1.68139100 |
| C  | -4.54818600 | 1.81304600  | 0.12758700  |
| H  | -4.38402000 | 2.10632100  | -0.91767100 |
| H  | -4.61696200 | 2.71014200  | 0.74618800  |
| H  | -5.48954800 | 1.25210800  | 0.20039500  |
| C  | 2.71652500  | -0.05692500 | 0.17019900  |
| H  | 3.06709800  | 0.66969100  | 0.91614300  |
| C  | 0.23386600  | 0.84581700  | 3.87366300  |
| H  | 0.80956400  | 1.25065800  | 4.70208300  |
| C  | -3.36795800 | -1.80126500 | -1.66962500 |
| H  | -3.87338200 | -2.18104100 | -2.55377300 |
| C  | 1.50919000  | 3.10577800  | 0.20101200  |
| H  | 2.55038800  | 2.83400800  | 0.41653800  |

|   |             |             |             |
|---|-------------|-------------|-------------|
| H | 0.97600600  | 3.10736400  | 1.16052800  |
| C | -2.29035400 | -2.54388800 | -1.13278600 |
| H | -2.09351800 | -3.54288900 | -1.50432500 |
| C | 2.90953100  | -1.47451900 | 0.74813500  |
| H | 2.33065300  | -1.58919000 | 1.67178300  |
| H | 2.50278400  | -2.20232800 | 0.03150200  |
| C | -0.45978800 | -4.11121300 | 0.43185900  |
| H | -1.27774400 | -4.80296100 | 0.19016200  |
| H | 0.13841400  | -4.53477800 | 1.24065700  |
| H | 0.17174200  | -3.96241400 | -0.45421500 |
| C | 0.03284400  | 4.94383300  | -0.75457400 |
| H | -0.55959200 | 5.02583600  | 0.16886200  |
| H | 0.03185900  | 5.93930800  | -1.21732500 |
| C | 1.46574400  | 4.52397300  | -0.39833300 |
| H | 1.90936300  | 5.23792900  | 0.30808300  |
| H | 2.08861600  | 4.55398100  | -1.30489500 |
| C | 3.57211100  | 0.12610600  | -1.10230900 |
| H | 3.48442000  | 1.15071000  | -1.48375300 |
| H | 3.18500400  | -0.53640000 | -1.88988500 |
| C | -0.62633800 | 3.91802400  | -1.68777200 |
| H | -0.10352100 | 3.92170100  | -2.65614000 |
| H | -1.66620000 | 4.20371200  | -1.89444700 |
| C | 4.39229000  | -1.78811100 | 1.00867900  |
| H | 4.77242100  | -1.12455400 | 1.79995400  |
| H | 4.49255000  | -2.81340800 | 1.38809900  |
| C | 5.23893900  | -1.60216800 | -0.25876700 |
| H | 6.29873700  | -1.78928500 | -0.04265700 |
| H | 4.93487200  | -2.34745700 | -1.00877900 |
| C | 5.05465200  | -0.19503000 | -0.84322200 |
| H | 5.62247200  | -0.09131400 | -1.77694200 |
| H | 5.46911700  | 0.54518600  | -0.14246000 |

# **I<sub>SP</sub> [Pd(SPhos)] (conformer c)**

|    |             |             |             |
|----|-------------|-------------|-------------|
| Pd | -2.53256800 | -2.03862100 | 0.95951900  |
| P  | -1.11243400 | -0.52184100 | 0.12987700  |
| O  | 2.82290100  | -1.00112900 | 1.74166600  |
| O  | 1.63710700  | 2.96112900  | -0.45486600 |
| C  | -0.24578200 | 0.49518400  | 1.45674200  |
| C  | 1.04626000  | 1.08141700  | 1.51251400  |
| C  | 2.16558000  | 0.89601200  | 0.52834700  |
| C  | 3.08010100  | -0.16430700 | 0.69353300  |
| C  | 4.18138400  | -0.31544300 | -0.16140300 |
| H  | 4.86907400  | -1.14348500 | -0.04283400 |
| C  | 4.39342000  | 0.62658500  | -1.16551200 |
| H  | 5.24136400  | 0.51030100  | -1.83505400 |
| C  | 3.55248500  | 1.72661500  | -1.31284300 |
| H  | 3.75819100  | 2.46376500  | -2.07918600 |
| C  | 2.46131000  | 1.87239200  | -0.44349300 |
| C  | 1.38127200  | 1.88240300  | 2.61985300  |
| H  | 2.37598400  | 2.31865400  | 2.64969400  |
| C  | 0.49631800  | 2.12018700  | 3.66582600  |
| H  | 0.79602500  | 2.74598000  | 4.50242200  |
| C  | -0.76345400 | 1.52709400  | 3.63174900  |
| H  | -1.47010600 | 1.67392000  | 4.44441700  |
| C  | -1.10975400 | 0.72295900  | 2.54989900  |
| H  | -2.07984900 | 0.23207600  | 2.54482200  |
| C  | 1.90151900  | 4.00649000  | -1.37621000 |

|                                                                       |             |             |             |   |             |             |             |
|-----------------------------------------------------------------------|-------------|-------------|-------------|---|-------------|-------------|-------------|
| H                                                                     | 2.90157400  | 4.43280800  | -1.22425300 | H | 3.06050900  | 0.45945700  | -2.99418500 |
| H                                                                     | 1.14872100  | 4.77201000  | -1.17986300 | H | 1.51138800  | 1.24056500  | -2.69905400 |
| H                                                                     | 1.80774400  | 3.66562700  | -2.41555100 | H | 4.14031000  | 2.61813200  | -3.50145200 |
| C                                                                     | 3.74575500  | -2.04198100 | 2.02534900  | H | 2.73714100  | 2.37535600  | -4.53779300 |
| H                                                                     | 3.80454600  | -2.76676800 | 1.20334600  | H | 1.37126700  | 3.87290600  | -3.09855000 |
| H                                                                     | 3.36294600  | -2.54018800 | 2.91755600  | H | 2.82536200  | 4.71995500  | -3.62349100 |
| H                                                                     | 4.74768600  | -1.64328300 | 2.23073800  | C | 4.83267200  | 1.54979600  | 3.19499700  |
| C                                                                     | 0.13940900  | -1.27519700 | -1.06126000 | C | 4.51267800  | 1.05201300  | 1.77254700  |
| H                                                                     | 0.92858900  | -0.54041200 | -1.26024900 | C | 3.03430200  | 0.62363400  | 1.65831600  |
| C                                                                     | -0.52771700 | -1.65495200 | -2.40282000 | C | 2.70261200  | -0.45147900 | 2.71589300  |
| H                                                                     | -1.37420800 | -2.32853800 | -2.20276600 | C | 3.02392100  | 0.04406400  | 4.13600000  |
| H                                                                     | -0.93804900 | -0.77144300 | -2.90325100 | C | 4.48653100  | 0.49665100  | 4.25750800  |
| C                                                                     | 0.46685200  | -2.34709700 | -3.35269500 | H | 4.25865100  | 2.46727700  | 3.39368300  |
| H                                                                     | -0.04773100 | -2.62376700 | -4.28233300 | H | 5.89337300  | 1.82549000  | 3.26231300  |
| H                                                                     | 1.25425100  | -1.63123300 | -3.63238100 | H | 5.16860700  | 0.20488300  | 1.53810200  |
| C                                                                     | 1.11275300  | -3.58194800 | -2.71108500 | H | 4.75074900  | 1.84120500  | 1.04993800  |
| H                                                                     | 0.34126200  | -4.34768400 | -2.54249100 | H | 2.42333900  | 1.50278600  | 1.91446400  |
| H                                                                     | 1.85028900  | -4.02378200 | -3.39394000 | H | 1.64658600  | -0.73743700 | 2.63791600  |
| C                                                                     | 1.76742100  | -3.22081200 | -1.37086200 | H | 3.29255400  | -1.35712100 | 2.51853900  |
| H                                                                     | 2.62110700  | -2.55128000 | -1.55127800 | H | 2.36073700  | 0.88648800  | 4.38281700  |
| H                                                                     | 2.17024200  | -4.12306600 | -0.89050600 | H | 2.80843500  | -0.74748400 | 4.86554400  |
| C                                                                     | 0.76718800  | -2.53510300 | -0.42482800 | H | 5.14548000  | -0.37513200 | 4.12803300  |
| H                                                                     | 1.24890300  | -2.28122500 | 0.52321900  | H | 4.68411600  | 0.89083500  | 5.26276000  |
| H                                                                     | -0.04581500 | -3.23468500 | -0.18213400 | C | 3.22043800  | -3.85654100 | -0.94896500 |
| C                                                                     | -2.02173100 | 0.77475500  | -0.90988500 | C | 2.70907100  | -2.64904100 | -0.14445100 |
| H                                                                     | -2.50479800 | 0.15267900  | -1.67668900 | C | 3.20729700  | -1.32271400 | -0.75910900 |
| C                                                                     | -3.15297300 | 1.46262200  | -0.11875900 | C | 4.74710400  | -1.31726600 | -0.83862400 |
| H                                                                     | -3.79240300 | 0.70169900  | 0.34541600  | C | 5.25982600  | -2.52019600 | -1.65247200 |
| H                                                                     | -2.72051400 | 2.05770900  | 0.69715500  | C | 4.75178000  | -3.84969600 | -1.07461900 |
| C                                                                     | -3.99000100 | 2.38248400  | -1.02442300 | H | 2.77406000  | -3.83332500 | -1.95456100 |
| H                                                                     | -4.51611100 | 1.77124500  | -1.77302700 | H | 2.88201600  | -4.78917100 | -0.47889300 |
| H                                                                     | -4.76515700 | 2.88267200  | -0.42939400 | H | 3.06364100  | -2.73619300 | 0.89145200  |
| C                                                                     | -3.11578800 | 3.42034200  | -1.74307700 | H | 1.61313900  | -2.64685100 | -0.10258700 |
| H                                                                     | -2.68270000 | 4.10447600  | -0.99820500 | H | 2.82982900  | -1.31247800 | -1.79320800 |
| H                                                                     | -3.72609400 | 4.03553300  | -2.41715900 | H | 5.11839900  | -0.38464200 | -1.28048800 |
| C                                                                     | -1.98012900 | 2.73965300  | -2.51983700 | H | 5.16585200  | -1.37650000 | 0.17401800  |
| H                                                                     | -2.40849200 | 2.14359900  | -3.33986100 | H | 4.91947600  | -2.42242100 | -2.69417900 |
| H                                                                     | -1.33323200 | 3.49314400  | -2.98951000 | H | 6.35741400  | -2.51142500 | -1.68110000 |
| C                                                                     | -1.14082600 | 1.82416000  | -1.60913500 | H | 5.19604000  | -4.00159100 | -0.07928000 |
| H                                                                     | -0.63144700 | 2.42861700  | -0.85161800 | H | 5.08842900  | -4.68869800 | -1.69727600 |
| H                                                                     | -0.35243000 | 1.34139400  | -2.19979800 | C | -3.01867900 | -4.00446200 | -1.78280500 |
| <b>2<sub>Cy</sub> [Pd(PCy<sub>3</sub>)<sub>2</sub>] (conformer F)</b> |             |             |             | C | -2.51790700 | -2.92815200 | -0.80375400 |
| Pd                                                                    | 0.00539400  | -0.02265700 | -0.01152200 | C | -3.00334000 | -1.51503700 | -1.19622100 |
| P                                                                     | 2.31959800  | 0.18933900  | -0.04519500 | C | -2.60802200 | -1.20763500 | -2.65779500 |
| P                                                                     | -2.31416200 | -0.20220600 | -0.02389500 | C | -3.11125200 | -2.28617800 | -3.63201300 |
| C                                                                     | 2.83764900  | 4.12570100  | -1.52963600 | C | -2.62353600 | -3.68404100 | -3.23078100 |
| C                                                                     | 2.39579400  | 2.95152600  | -0.64001300 | H | -4.11477000 | -4.07613500 | -1.71505300 |
| C                                                                     | 2.96035500  | 1.59867200  | -1.13062300 | H | -2.62391100 | -4.98482900 | -1.48553400 |
| C                                                                     | 2.59879200  | 1.37915900  | -2.61623200 | H | -1.41869600 | -2.93018100 | -0.78548400 |
| C                                                                     | 3.04132800  | 2.55891200  | -3.49900300 | H | -2.84820600 | -3.18193700 | 0.21038100  |
| C                                                                     | 2.46679400  | 3.89074500  | -2.99988800 | H | -4.10066000 | -1.50008600 | -1.12837200 |
| H                                                                     | 3.92725000  | 4.25691100  | -1.44745300 | H | -3.00101800 | -0.23207200 | -2.96778700 |
| H                                                                     | 2.38384300  | 5.05595200  | -1.16353900 | H | -1.51252300 | -1.13664900 | -2.71680000 |
| H                                                                     | 2.70453100  | 3.14494100  | 0.39423700  | H | -4.21168000 | -2.27751200 | -3.64791500 |
| H                                                                     | 1.29826500  | 2.88845000  | -0.63071300 | H | -2.78310600 | -2.04410900 | -4.65132800 |
| H                                                                     | 4.05654200  | 1.63361800  | -1.04908100 | H | -1.52837500 | -3.72676200 | -3.32563100 |
|                                                                       |             |             |             | H | -3.02770800 | -4.44188400 | -3.91446600 |

|                                                                       |             |             |             |   |             |             |             |
|-----------------------------------------------------------------------|-------------|-------------|-------------|---|-------------|-------------|-------------|
| C                                                                     | -3.18635400 | 3.91575800  | -0.54825200 | C | -2.27756100 | 1.56124300  | -2.37607300 |
| C                                                                     | -2.73730700 | 2.62667500  | 0.16171800  | C | -3.18194600 | 0.59609500  | -1.57585500 |
| C                                                                     | -3.16386100 | 1.37695400  | -0.63774100 | C | -4.60044900 | 1.19264800  | -1.44297400 |
| C                                                                     | -4.69118400 | 1.37667400  | -0.85088300 | C | -5.20392400 | 1.51173300  | -2.82354400 |
| C                                                                     | -5.14469900 | 2.66335800  | -1.56656800 | C | -4.30110000 | 2.45191400  | -3.63487800 |
| C                                                                     | -4.70113000 | 3.92177400  | -0.80529600 | H | -2.90258200 | 0.97042900  | -4.36199500 |
| H                                                                     | -2.65473000 | 4.00220800  | -1.50760400 | H | -2.22961700 | 2.59619400  | -4.28505900 |
| H                                                                     | -2.89840200 | 4.79115500  | 0.04849700  | H | -2.14544500 | 2.49486200  | -1.80978900 |
| H                                                                     | -3.19038000 | 2.60004000  | 1.16184700  | H | -1.27653900 | 1.12706100  | -2.48048700 |
| H                                                                     | -1.64985600 | 2.62222100  | 0.30509700  | H | -3.26602200 | -0.32597000 | -2.17193900 |
| H                                                                     | -2.69675700 | 1.47949300  | -1.62929000 | H | -5.26712900 | 0.51552800  | -0.89907700 |
| H                                                                     | -5.01164200 | 0.50159600  | -1.42850100 | H | -4.55447600 | 2.12115200  | -0.85826800 |
| H                                                                     | -5.19988000 | 1.31609200  | 0.11970700  | H | -5.34551800 | 0.57347200  | -3.38087200 |
| H                                                                     | -4.71691100 | 2.68206600  | -2.58009300 | H | -6.20150300 | 1.95332800  | -2.69901100 |
| H                                                                     | -6.23579800 | 2.65678200  | -1.68944500 | H | -4.26082700 | 3.43201400  | -3.13615800 |
| H                                                                     | -5.22976900 | 3.96340500  | 0.15885100  | H | -4.72946700 | 2.62590500  | -4.63048800 |
| H                                                                     | -4.99214400 | 4.82360100  | -1.35942800 | C | -2.81240200 | -4.18617100 | -0.42263800 |
| C                                                                     | -4.87953100 | -1.64308700 | 3.13120900  | C | -2.41695100 | -2.73551900 | -0.74943600 |
| C                                                                     | -4.54131600 | -1.01243400 | 1.76662700  | C | -3.02264600 | -1.74377000 | 0.26759500  |
| C                                                                     | -3.02983900 | -0.72796700 | 1.65124200  | C | -4.55430800 | -1.90838400 | 0.32557500  |
| C                                                                     | -2.57080300 | 0.18691300  | 2.80747200  | C | -4.94633300 | -3.35807200 | 0.66718800  |
| C                                                                     | -2.90095900 | -0.44209100 | 4.17223500  | C | -4.33601500 | -4.35603300 | -0.32778900 |
| C                                                                     | -4.39728800 | -0.76689800 | 4.29709200  | H | -2.35557900 | -4.47380900 | 0.53609900  |
| H                                                                     | -4.40279500 | -2.63233500 | 3.19933600  | H | -2.39997800 | -4.86482000 | -1.18062100 |
| H                                                                     | -5.96170400 | -1.81372400 | 3.20521500  | H | -2.77003200 | -2.49046500 | -1.76256400 |
| H                                                                     | -5.10393400 | -0.07541000 | 1.66453100  | H | -1.32567100 | -2.62682400 | -0.76221600 |
| H                                                                     | -4.88457600 | -1.67360600 | 0.96234800  | H | -2.61746300 | -2.02045000 | 1.25196100  |
| H                                                                     | -2.50538700 | -1.68463000 | 1.80008600  | H | -4.99588300 | -1.22282200 | 1.05932200  |
| H                                                                     | -1.49505900 | 0.38241600  | 2.72367000  | H | -4.98821300 | -1.64930300 | -0.65000000 |
| H                                                                     | -3.07870900 | 1.15845300  | 2.73835800  | H | -4.59643200 | -3.59638700 | 1.68262700  |
| H                                                                     | -2.31573900 | -1.36580000 | 4.29457100  | H | -6.03990200 | -3.45518800 | 0.68322000  |
| H                                                                     | -2.59044900 | 0.23355700  | 4.97995300  | H | -4.78072200 | -4.19165500 | -1.32082900 |
| H                                                                     | -4.96995900 | 0.17281700  | 4.30216700  | H | -4.58908300 | -5.38448400 | -0.03933700 |
| H                                                                     | -4.60337600 | -1.26211900 | 5.25488200  | C | 3.20712300  | -3.29987000 | 2.51346800  |
| <b>2<sub>Cy</sub> [Pd(PCy<sub>3</sub>)<sub>2</sub>] (conformer C)</b> |             |             |             | C | 2.61861600  | -2.45920000 | 1.36794600  |
| Pd                                                                    | -0.00015800 | -0.00064600 | -0.01974300 | C | 3.11534300  | -0.99642800 | 1.40661600  |
| P                                                                     | -2.32677800 | -0.00254700 | 0.01293900  | C | 2.80554100  | -0.37826500 | 2.78760200  |
| P                                                                     | 2.32644900  | 0.00233400  | 0.01237700  | C | 3.38456000  | -1.21991300 | 3.93860800  |
| C                                                                     | -3.20549600 | 3.30137800  | 2.51318400  | C | 2.90290200  | -2.67573900 | 3.88209200  |
| C                                                                     | -2.61991600 | 2.46056400  | 1.36622800  | H | 4.29713200  | -3.38114400 | 2.38542600  |
| C                                                                     | -3.11459400 | 0.99716600  | 1.40724400  | H | 2.81046600  | -4.32234800 | 2.46292800  |
| C                                                                     | -2.80126400 | 0.38030100  | 2.78806100  | H | 1.52171000  | -2.45475100 | 1.43836700  |
| C                                                                     | -3.37826100 | 1.22223000  | 3.93982500  | H | 2.86265300  | -2.92659400 | 0.40682000  |
| C                                                                     | -2.89731900 | 2.67816500  | 3.88132300  | H | 4.20571800  | -0.99506900 | 1.26667300  |
| H                                                                     | -4.29588900 | 3.38217000  | 2.38814600  | H | 3.20414900  | 0.64075000  | 2.85426700  |
| H                                                                     | -2.80941300 | 4.32399800  | 2.46098800  | H | 1.71469500  | -0.29808400 | 2.90112800  |
| H                                                                     | -2.86861100 | 2.92699500  | 0.40585400  | H | 4.48352700  | -1.20079500 | 3.88369800  |
| H                                                                     | -1.52275400 | 2.45772300  | 1.43254000  | H | 3.11340600  | -0.76437500 | 4.90000600  |
| H                                                                     | -4.20522100 | 0.99420100  | 1.26926800  | H | 1.81747600  | -2.70543900 | 4.05878400  |
| H                                                                     | -3.19887500 | -0.63899700 | 2.85633200  | H | 3.36804100  | -3.26341100 | 4.68414900  |
| H                                                                     | -1.71009500 | 0.30105400  | 2.89913800  | C | 2.80857300  | 4.18615700  | -0.42502700 |
| H                                                                     | -4.47733700 | 1.20259900  | 3.88731600  | C | 2.41391700  | 2.73510300  | -0.75105800 |
| H                                                                     | -3.10479800 | 0.76736100  | 4.90088500  | C | 3.02140500  | 1.74409000  | 0.26562400  |
| H                                                                     | -1.81143600 | 2.70835800  | 4.05512300  | C | 4.55298500  | 1.90993400  | 0.32169700  |
| H                                                                     | -3.36055200 | 3.26613300  | 4.68426400  | C | 4.94408700  | 3.35989600  | 0.66317500  |
| C                                                                     | -2.87800700 | 1.88735200  | -3.75364500 | C | 4.33212800  | 4.35731800  | -0.33134600 |
|                                                                       |             |             |             | H | 2.35222000  | 4.47375600  | 0.53394600  |



|                                                         |             |             |             |                                                              |             |             |             |
|---------------------------------------------------------|-------------|-------------|-------------|--------------------------------------------------------------|-------------|-------------|-------------|
| H                                                       | 2.39506600  | 4.86424200  | -1.18292500 | C                                                            | -3.09833800 | 1.64398300  | 0.32956300  |
| H                                                       | 2.76616200  | 2.48998000  | -1.76446900 | C                                                            | -2.45861200 | 2.50181000  | 1.24020900  |
| H                                                       | 1.32271100  | 2.62559100  | -0.76273000 | C                                                            | -3.00586200 | 3.74744900  | 1.54812300  |
| H                                                       | 2.61714200  | 2.02074800  | 1.25038300  | H                                                            | -4.61348600 | 5.13706000  | 1.16919200  |
| H                                                       | 4.99620400  | 1.22445700  | 1.05453600  | H                                                            | -5.74812700 | 3.64292600  | -0.46321600 |
| H                                                       | 4.98570500  | 1.65171600  | -0.65462900 | H                                                            | -4.79116500 | 1.42950300  | -0.99755400 |
| H                                                       | 4.59472400  | 3.59786700  | 1.67888100  | H                                                            | -1.52198700 | 2.18868600  | 1.69599900  |
| H                                                       | 6.03758400  | 3.45795700  | 0.67839700  | H                                                            | -2.49920000 | 4.39888500  | 2.25556400  |
| H                                                       | 4.77621500  | 4.19327900  | -1.32471700 | C                                                            | -4.17958400 | -1.27906600 | -4.07209900 |
| H                                                       | 4.58452200  | 5.38600000  | -0.04313000 | C                                                            | -4.83052300 | -1.63111400 | -2.88855500 |
| C                                                       | 2.87753100  | -1.89099200 | -3.75235100 | C                                                            | -4.29304000 | -1.26073700 | -1.65309100 |
| C                                                       | 2.27795700  | -1.56479500 | -2.37442400 | C                                                            | -3.09331300 | -0.53656100 | -1.58733500 |
| C                                                       | 3.18153800  | -0.59739000 | -1.57605900 | C                                                            | -2.43982900 | -0.19834400 | -2.78426300 |
| C                                                       | 4.60054300  | -1.19277100 | -1.44328400 | C                                                            | -2.98299400 | -0.55983300 | -4.01732900 |
| C                                                       | 5.20369700  | -1.51207600 | -2.82396000 | H                                                            | -4.59828900 | -1.57006200 | -5.03205600 |
| C                                                       | 4.30147100  | -2.45363100 | -3.63439600 | H                                                            | -5.75823000 | -2.19668700 | -2.92388600 |
| H                                                       | 2.90032500  | -0.97444500 | -4.36133100 | H                                                            | -4.80664200 | -1.54294200 | -0.73881800 |
| H                                                       | 2.22962700  | -2.60107100 | -4.28270500 | H                                                            | -1.49538300 | 0.33887800  | -2.73927500 |
| H                                                       | 2.14888300  | -2.49820800 | -1.80706700 | H                                                            | -2.46546600 | -0.29035200 | -4.93440500 |
| H                                                       | 1.27589200  | -1.13283200 | -2.47793400 | C                                                            | 4.17969300  | 1.10604700  | 4.12268200  |
| H                                                       | 3.26435900  | 0.32399100  | -2.17338700 | C                                                            | 4.82536500  | 1.51802100  | 2.95572900  |
| H                                                       | 5.26709100  | -0.51515800 | -0.89986100 | C                                                            | 4.28833600  | 1.20140400  | 1.70513400  |
| H                                                       | 4.55525800  | -2.12110500 | -0.85820300 | C                                                            | 3.09424300  | 0.47148900  | 1.60772900  |
| H                                                       | 5.34410800  | -0.57398800 | -3.38187400 | C                                                            | 2.44600400  | 0.07283400  | 2.78876700  |
| H                                                       | 6.20177400  | -1.95260400 | -2.69963600 | C                                                            | 2.98875500  | 0.38070600  | 4.03639700  |
| H                                                       | 4.26278700  | -3.43363300 | -3.13537000 | H                                                            | 4.59792400  | 1.35539100  | 5.09450600  |
| H                                                       | 4.72938600  | -2.62735800 | -4.63024800 | H                                                            | 5.74864800  | 2.08873700  | 3.01575300  |
| <b>2<sub>H</sub> [Pd(PH<sub>3</sub>)<sub>2</sub>]</b>   |             |             |             | H                                                            | 4.79800100  | 1.53026000  | 0.80438600  |
| Pd                                                      | 0.00000100  | -0.00115000 | -0.00048600 | H                                                            | 1.50584600  | -0.46922200 | 2.72051500  |
| P                                                       | 2.28418200  | 0.00126000  | 0.00050200  | H                                                            | 2.47504200  | 0.06482700  | 4.94070100  |
| H                                                       | 3.01282000  | -1.18379500 | -0.27385400 | C                                                            | 4.16962800  | 3.03101100  | -3.01518600 |
| H                                                       | 3.00956600  | 0.83417500  | -0.88828300 | C                                                            | 2.97712500  | 3.31170700  | -2.34356000 |
| H                                                       | 3.00905700  | 0.35721700  | 1.16571800  | C                                                            | 2.43813500  | 2.38053000  | -1.45570100 |
| P                                                       | -2.28418300 | 0.00124900  | 0.00052100  | C                                                            | 3.09202600  | 1.16105900  | -1.21235800 |
| H                                                       | -3.00823100 | 1.20095600  | 0.21737300  | C                                                            | 4.28686100  | 0.88710000  | -1.89457300 |
| H                                                       | -3.01205400 | -0.40948400 | -1.14453100 | C                                                            | 4.81997100  | 1.81643100  | -2.79182700 |
| H                                                       | -3.01117500 | -0.78379800 | 0.93057700  | H                                                            | 4.58497600  | 3.75174300  | -3.71484100 |
| <b>2<sub>Ph</sub> [Pd(PPh<sub>3</sub>)<sub>2</sub>]</b> |             |             |             | H                                                            | 2.45892200  | 4.25072600  | -2.52026700 |
| Pd                                                      | 0.00017700  | 0.00062700  | -0.00036800 | H                                                            | 1.49569000  | 2.58641900  | -0.95341800 |
| P                                                       | -2.30764800 | 0.00239400  | 0.00056200  | H                                                            | 4.80064600  | -0.05578000 | -1.73274800 |
| P                                                       | 2.30878000  | -0.00091400 | -0.00153600 | H                                                            | 5.74408500  | 1.58793100  | -3.31677800 |
| C                                                       | -4.16798500 | -2.90359100 | 3.13675700  | C                                                            | 4.18732900  | -4.12172200 | -1.10706400 |
| C                                                       | -4.81798800 | -1.69868800 | 2.86466500  | C                                                            | 4.84352400  | -3.30704000 | -0.18275500 |
| C                                                       | -4.28527900 | -0.80673000 | 1.93006200  | C                                                            | 4.30488400  | -2.06674400 | 0.16923300  |
| C                                                       | -3.09067200 | -1.10851600 | 1.25896900  | C                                                            | 3.09820800  | -1.62812900 | -0.39778000 |
| C                                                       | -2.43758300 | -2.31791800 | 1.55082600  | C                                                            | 2.43956000  | -2.46216700 | -1.31691100 |
| C                                                       | -2.97634800 | -3.21222500 | 2.47596600  | C                                                            | 2.98417400  | -3.69555000 | -1.67489700 |
| H                                                       | -4.58326000 | -3.59505000 | 3.86542200  | H                                                            | 4.60701800  | -5.08717400 | -1.37775300 |
| H                                                       | -5.74173700 | -1.44884300 | 3.38045500  | H                                                            | 5.77634700  | -3.63573700 | 0.26835700  |
| H                                                       | -4.79925000 | 0.12869800  | 1.73000500  | H                                                            | 4.82297200  | -1.44413800 | 0.89279000  |
| H                                                       | -1.49606500 | -2.54507800 | 1.05599100  | H                                                            | 1.49009400  | -2.14057300 | -1.73870900 |
| H                                                       | -2.45891500 | -4.14396000 | 2.68979200  | H                                                            | 2.46246000  | -4.32888800 | -2.38779400 |
| C                                                       | -4.19210100 | 4.16228400  | 0.93748300  | <b>2<sub>SP</sub> [Pd(SPhos)<sub>2</sub>] (conformer ac)</b> |             |             |             |
| C                                                       | -4.82872400 | 3.32366000  | 0.02113400  | Pd                                                           | -0.72343800 | 0.30522300  | 0.06824600  |
| C                                                       | -4.28781400 | 2.07094200  | -0.28020400 | P                                                            | 1.59620600  | 0.54735400  | 0.21232700  |
|                                                         |             |             |             | P                                                            | -3.02787600 | 0.58925800  | 0.13387000  |

|   |             |             |             |   |             |             |             |
|---|-------------|-------------|-------------|---|-------------|-------------|-------------|
| O | -2.96631900 | -3.60125100 | 1.16049700  | C | 1.61111200  | 0.48809500  | -2.52045600 |
| O | 4.48298200  | -2.70179400 | -1.16883100 | H | 0.57080200  | 0.72238700  | -2.30267200 |
| O | 5.35933900  | 1.84830300  | -0.42930500 | C | -3.60319900 | 2.11217700  | -0.85428900 |
| C | 5.22483600  | -1.78230300 | -0.48233600 | H | -4.55290100 | 2.45871700  | -0.41702100 |
| O | -2.42076200 | -1.54828800 | -3.01799400 | C | 4.80924500  | -4.07585800 | -1.03669800 |
| C | -2.64364400 | -2.56899000 | -0.92067700 | H | 5.84350900  | -4.27591700 | -1.34608300 |
| C | -4.01858700 | -1.98586900 | -0.80261600 | H | 4.12518700  | -4.60708900 | -1.70110500 |
| C | -4.31806400 | -0.67149100 | -0.38488000 | H | 4.66267300  | -4.43031700 | -0.00849400 |
| C | 3.81653700  | -0.09358500 | -1.71446600 | C | 6.70665900  | 0.22285300  | 0.78356000  |
| C | -6.70736100 | -1.15215400 | -0.67803100 | H | 7.29553800  | 0.99055700  | 1.26994300  |
| H | -7.73907700 | -0.81307300 | -0.62838600 | C | -2.54004300 | -4.46689900 | 2.19778800  |
| C | 4.88262000  | -0.43351700 | -0.71318300 | H | -2.43752800 | -5.50229900 | 1.84545900  |
| C | -6.40452300 | -2.45146600 | -1.08493900 | H | -3.31864900 | -4.42286800 | 2.96174500  |
| H | -7.19586700 | -3.14558600 | -1.35613700 | H | -1.58676300 | -4.13845200 | 2.63254900  |
| C | -5.07457900 | -2.85245500 | -1.14191100 | C | -5.67294600 | -0.28705200 | -0.33400900 |
| H | -4.82917900 | -3.86296600 | -1.45678500 | H | -5.93035200 | 0.72194400  | -0.02440100 |
| C | 2.29574000  | 3.23057700  | -0.53019800 | C | 6.22405800  | 2.88418300  | 0.01093400  |
| H | 3.03215200  | 2.83155800  | -1.23175800 | H | 6.20599000  | 2.99364600  | 1.10323200  |
| H | 1.33194300  | 3.26012000  | -1.05938500 | H | 5.84707100  | 3.80011800  | -0.44618000 |
| C | 2.42840500  | -0.58709500 | 1.46913400  | H | 7.25662900  | 2.70931200  | -0.31761700 |
| H | 3.51393800  | -0.47476300 | 1.37733200  | C | 2.69155300  | 4.66293400  | -0.13032500 |
| C | 2.04154200  | 0.42279400  | -3.84394000 | H | 3.70555800  | 4.65088400  | 0.29719000  |
| H | 1.34407300  | 0.62859400  | -4.65247200 | H | 2.73995000  | 5.29451400  | -1.02758600 |
| C | -1.88046300 | -2.39160800 | -2.08895300 | C | -3.68435500 | 0.89696600  | 1.89162100  |
| C | 5.66900400  | 0.55893700  | -0.09858100 | H | -4.77885000 | 0.96979500  | 1.81784100  |
| C | 4.22866400  | -0.17350600 | -3.05693400 | C | 1.72854600  | 5.26676200  | 0.89939000  |
| H | 5.25998900  | -0.44901400 | -3.26033900 | H | 2.06514200  | 6.26793200  | 1.19971800  |
| C | 2.04044800  | -0.24171600 | 2.92239200  | H | 0.73727400  | 5.39271400  | 0.43903400  |
| H | 2.38593700  | 0.76512500  | 3.18118700  | C | -3.01671600 | 4.50003500  | -1.55646000 |
| H | 0.94472100  | -0.23903100 | 3.01638500  | H | -3.93178800 | 4.91558500  | -1.10711300 |
| C | -2.16411400 | -3.45547000 | 0.06112100  | H | -2.24958000 | 5.28186400  | -1.47741000 |
| C | -0.66725200 | -3.07037000 | -2.27066400 | C | -2.57224500 | 3.25983200  | -0.76225600 |
| H | -0.07274100 | -2.92455500 | -3.16384300 | H | -2.38261300 | 3.53806900  | 0.27831400  |
| C | 1.18790900  | 2.92513900  | 1.71459900  | H | -1.61413400 | 2.88930700  | -1.15171700 |
| H | 0.18913800  | 2.94674000  | 1.25887300  | C | -4.28878100 | 3.00756000  | -3.14685400 |
| H | 1.09422700  | 2.29940600  | 2.60698300  | H | -4.43027500 | 2.72939400  | -4.19984400 |
| C | 2.47118700  | 0.25404900  | -1.42745500 | H | -5.27072000 | 3.34415100  | -2.78063000 |
| C | 3.36617400  | 0.08883300  | -4.11674300 | C | 1.60235000  | 4.34909800  | 2.12201200  |
| H | 3.72605400  | 0.02586800  | -5.14060000 | H | 0.87102100  | 4.75625000  | 2.83293200  |
| C | -3.16882700 | 2.19108400  | 2.54991400  | H | 2.56663800  | 4.31579700  | 2.65236700  |
| H | -3.47623800 | 3.06696100  | 1.96792800  | C | -3.36364700 | 1.12385700  | 4.85812200  |
| H | -2.07003400 | 2.17998500  | 2.55484700  | H | -2.27280700 | 1.05327900  | 4.98385600  |
| C | -0.22249800 | -3.93790100 | -1.27700100 | H | -3.78850400 | 1.24484800  | 5.86337700  |
| H | 0.71712000  | -4.46617400 | -1.41527400 | C | 6.26195400  | -2.13085900 | 0.39409800  |
| C | 2.04264800  | -2.04662700 | 1.14706400  | H | 6.50934300  | -3.16844400 | 0.58143800  |
| H | 2.35890900  | -2.30530000 | 0.13179000  | C | -3.87940400 | -0.16589600 | 4.20510300  |
| H | 0.94764600  | -2.13125800 | 1.16106200  | H | -4.97955900 | -0.14797000 | 4.18438100  |
| C | -0.95395800 | -4.14096200 | -0.10874000 | H | -3.59397300 | -1.03908500 | 4.80705500  |
| H | -0.58582700 | -4.82284700 | 0.64799600  | C | -3.34309300 | -0.32398100 | 2.77329000  |
| C | 2.16841400  | 2.30058700  | 0.69537700  | H | -2.24954300 | -0.43469600 | 2.80173800  |
| H | 3.16259800  | 2.20551900  | 1.15570200  | H | -3.73565600 | -1.24206400 | 2.32289100  |
| C | -3.84582100 | 1.77337400  | -2.34229700 | C | 2.64646100  | -3.03973400 | 2.15339500  |
| H | -2.91397100 | 1.37393000  | -2.76710700 | H | 2.32266300  | -4.06020700 | 1.90559900  |
| H | -4.59413400 | 0.98233100  | -2.44379400 | H | 3.74346900  | -3.02601900 | 2.06882900  |
| C | -3.69359900 | 2.34517700  | 3.98950400  | C | -1.73364700 | -1.37015200 | -4.24515000 |
| H | -3.27733100 | 3.25747200  | 4.43712300  | H | -0.73582900 | -0.94161400 | -4.09043600 |
| H | -4.78531300 | 2.48226400  | 3.96234000  | H | -2.34145300 | -0.67562400 | -4.82828000 |

|   |             |             |             |
|---|-------------|-------------|-------------|
| H | -1.63876800 | -2.31731400 | -4.79354200 |
| C | 6.98393800  | -1.12007000 | 1.02449900  |
| H | 7.78562100  | -1.38455600 | 1.70874100  |
| C | 2.64065900  | -1.24362700 | 3.92534200  |
| H | 3.73730600  | -1.15471700 | 3.91073600  |
| H | 2.31918000  | -0.98271800 | 4.94245500  |
| C | -3.28497400 | 4.16198100  | -3.02870100 |
| H | -2.33896800 | 3.86976300  | -3.50902700 |
| H | -3.65049000 | 5.04622500  | -3.56729400 |
| C | 2.25165100  | -2.69042800 | 3.59458800  |
| H | 1.16374100  | -2.80890300 | 3.71144200  |
| H | 2.72211800  | -3.38415200 | 4.30409700  |

**2<sub>SP</sub> [Pd(SPhos)<sub>2</sub>] (conformer ab)**

|    |             |             |             |
|----|-------------|-------------|-------------|
| Pd | -0.00552000 | -0.01254200 | 0.14522400  |
| P  | -2.22349100 | 0.70906600  | 0.30825200  |
| P  | 2.21640600  | -0.72100300 | 0.31089900  |
| O  | -2.80507700 | -1.71242800 | -2.98904600 |
| O  | -2.61859700 | -3.22402500 | 1.44136700  |
| C  | -3.83075000 | -1.61414000 | -0.41496600 |
| C  | -3.79700700 | -0.29885800 | 0.10237500  |
| C  | -5.02778900 | 0.28426600  | 0.47092600  |
| H  | -5.04330900 | 1.27742800  | 0.90270300  |
| C  | -6.27267400 | -1.64998000 | -0.23370200 |
| H  | -7.21291600 | -2.17708300 | -0.37377300 |
| C  | -2.64614200 | -2.45978000 | -0.77404200 |
| C  | -5.07167900 | -2.25691700 | -0.58167100 |
| H  | -5.07577200 | -3.26572200 | -0.98525400 |
| C  | -2.44793100 | 1.63386400  | -2.35382500 |
| H  | -1.55202400 | 1.01864400  | -2.49648800 |
| H  | -3.30984400 | 0.97705400  | -2.53034500 |
| C  | -2.11442200 | -3.34983100 | 0.17759200  |
| C  | -2.20875000 | -2.56786500 | -2.10567700 |
| C  | -1.25177800 | -3.52177900 | -2.47879000 |
| H  | -0.92005600 | -3.60888500 | -3.50596000 |
| C  | -2.48968800 | 2.15279800  | -0.90070700 |
| H  | -1.57966400 | 2.74789500  | -0.74071300 |
| C  | -2.41704200 | -1.76811000 | -4.35045900 |
| H  | -1.34960500 | -1.54433300 | -4.47585400 |
| H  | -3.00771800 | -1.00458600 | -4.86014900 |
| H  | -2.63453000 | -2.74929500 | -4.79377700 |
| C  | -2.53503700 | 1.47003600  | 2.01143800  |
| H  | -3.52961900 | 1.93555400  | 2.01850600  |
| C  | -6.24764800 | -0.36769100 | 0.31045400  |
| H  | -7.16847700 | 0.12662600  | 0.60974100  |
| C  | -0.74116400 | -4.38277300 | -1.50935300 |
| H  | -0.00835400 | -5.13232500 | -1.79680300 |
| C  | -3.70432800 | 3.08039900  | -0.70382700 |
| H  | -3.73689400 | 3.47515600  | 0.31948700  |
| H  | -4.63075700 | 2.51430400  | -0.85921200 |
| C  | -1.15767700 | -4.30907400 | -0.18197000 |
| H  | -0.75039900 | -4.99394200 | 0.55149200  |
| C  | -2.51788900 | 0.37262100  | 3.09676100  |
| H  | -3.26673400 | -0.39570100 | 2.87318500  |
| H  | -1.53979300 | -0.12755100 | 3.07211600  |
| C  | -2.26487800 | -4.19424300 | 2.41243300  |
| H  | -2.53145900 | -5.20784500 | 2.08378200  |

|   |             |             |             |
|---|-------------|-------------|-------------|
| H | -2.83696900 | -3.94173700 | 3.30722600  |
| H | -1.19434600 | -4.16088600 | 2.64904700  |
| C | -3.64700800 | 3.73804900  | -3.15393500 |
| H | -4.58612800 | 3.20587100  | -3.36694100 |
| H | -3.59791700 | 4.58025600  | -3.85691700 |
| C | -3.67964300 | 4.24896200  | -1.70677400 |
| H | -4.55450700 | 4.89359100  | -1.54834600 |
| H | -2.79260500 | 4.87211500  | -1.51867300 |
| C | -2.46276500 | 2.78580200  | -3.37384600 |
| H | -1.52450900 | 3.35092800  | -3.28570300 |
| H | -2.48887000 | 2.37818100  | -4.39393400 |
| C | -2.76198500 | 0.95748900  | 4.49760400  |
| H | -3.78107300 | 1.36987400  | 4.54894300  |
| H | -2.71212700 | 0.15814500  | 5.24888000  |
| C | -1.75189700 | 2.06472800  | 4.83057300  |
| H | -1.97161200 | 2.50226600  | 5.81335800  |
| H | -0.74537900 | 1.62567200  | 4.89947400  |
| C | -1.75216100 | 3.15441800  | 3.74879700  |
| H | -0.99198300 | 3.91459400  | 3.97580700  |
| H | -2.72160700 | 3.67547100  | 3.76098500  |
| C | 3.75351400  | -4.14963300 | -1.83237700 |
| C | 3.74219700  | -3.02597600 | -0.77946400 |
| C | 2.51699100  | -2.10859400 | -0.95551000 |
| C | 2.48643300  | -1.52947100 | -2.38599600 |
| C | 2.53682500  | -2.63649100 | -3.45341300 |
| C | 3.73441800  | -3.57686800 | -3.25635100 |
| H | 2.87453400  | -4.79522800 | -1.68644800 |
| H | 4.63680300  | -4.78593400 | -1.68769800 |
| H | 4.66204700  | -2.43923300 | -0.89233700 |
| H | 3.76342400  | -3.46547600 | 0.22579300  |
| H | 1.61332500  | -2.72196100 | -0.83276000 |
| H | 1.58129900  | -0.92473300 | -2.51571400 |
| H | 3.33811300  | -0.84994000 | -2.52147600 |
| H | 1.60777900  | -3.22169100 | -3.40383000 |
| H | 2.56994000  | -2.18545900 | -4.45484800 |
| H | 4.66707000  | -3.01988200 | -3.43093200 |
| H | 3.71089400  | -4.38821000 | -3.99596700 |
| C | 6.26852500  | 1.66642800  | -0.06493100 |
| C | 6.23450400  | 0.36947400  | 0.44267400  |
| C | 5.01317000  | -0.28937000 | 0.55691600  |
| C | 3.78899000  | 0.30136600  | 0.17843200  |
| C | 3.83112400  | 1.63084700  | -0.30040500 |
| C | 5.07387500  | 2.28022600  | -0.42241900 |
| H | 7.21029800  | 2.19898000  | -0.16955200 |
| H | 7.14966600  | -0.13143900 | 0.74831800  |
| H | 5.02231800  | -1.29507100 | 0.95857900  |
| H | 5.08380800  | 3.29986400  | -0.79765300 |
| C | 0.76689100  | 4.43963900  | -1.36067300 |
| C | 1.30675900  | 3.62259500  | -2.35206300 |
| C | 2.25428900  | 2.65351100  | -1.99415300 |
| C | 2.65332300  | 2.48689300  | -0.65663000 |
| C | 2.09110700  | 3.33215600  | 0.31789700  |
| C | 1.14388500  | 4.30637100  | -0.02618200 |
| H | 0.04217800  | 5.20145800  | -1.63600100 |
| H | 1.00562100  | 3.75581500  | -3.38369400 |
| H | 0.71447400  | 4.95761200  | 0.72511200  |
| O | 2.87831200  | 1.83970600  | -2.89753500 |

|                                                              |             |             |             |   |             |             |             |
|--------------------------------------------------------------|-------------|-------------|-------------|---|-------------|-------------|-------------|
| O                                                            | 2.55891000  | 3.15046200  | 1.58871600  | H | -7.53236800 | -2.12248400 | -1.46383900 |
| C                                                            | 2.52325100  | 1.95070100  | -4.26464000 | C | -4.69714900 | 3.89777200  | 1.92174800  |
| H                                                            | 3.12729000  | 1.20907600  | -4.79074900 | H | -4.52149600 | 4.42585400  | 0.97570800  |
| H                                                            | 1.45945700  | 1.73167000  | -4.42444300 | H | -3.89021100 | 4.13051800  | 2.61859500  |
| H                                                            | 2.74963200  | 2.94928000  | -4.66228800 | H | -5.65414400 | 4.22581700  | 2.34833600  |
| C                                                            | -1.50721700 | 2.56842100  | 2.34625900  | C | -3.14631800 | 0.76068900  | -1.43182000 |
| H                                                            | -0.49845100 | 2.13719500  | 2.28639400  | H | -4.23138400 | 0.63610500  | -1.34329600 |
| H                                                            | -1.54414300 | 3.37134300  | 1.60002400  | C | -2.74257400 | 0.49665700  | -2.90072700 |
| C                                                            | 2.49774300  | -1.55875700 | 1.98347200  | H | -1.64639900 | 0.53543800  | -2.98476600 |
| H                                                            | 3.49378300  | -2.02072500 | 1.99022300  | H | -3.04732500 | -0.50625600 | -3.21770700 |
| C                                                            | 2.18828300  | 4.08530800  | 2.58778800  | C | -3.36745100 | 1.52872300  | -3.85641700 |
| H                                                            | 2.73655300  | 3.79393600  | 3.48567200  | H | -3.03902200 | 1.32259300  | -4.88381500 |
| H                                                            | 2.46990200  | 5.10853200  | 2.30469200  | H | -4.46140200 | 1.41026500  | -3.84815800 |
| H                                                            | 1.11224900  | 4.05127700  | 2.79716200  | C | -3.01476200 | 2.96816400  | -3.46090000 |
| C                                                            | 1.46866600  | -2.67537600 | 2.24622800  | H | -1.93246300 | 3.12290400  | -3.58405900 |
| H                                                            | 1.52742900  | -3.44420600 | 1.46621500  | H | -3.51238800 | 3.68109300  | -4.13161200 |
| H                                                            | 0.45864200  | -2.24732700 | 2.18188800  | C | -3.40118500 | 3.24122600  | -2.00054800 |
| C                                                            | 1.68632900  | -3.32127400 | 3.62671600  | H | -4.49602200 | 3.20814900  | -1.90183400 |
| H                                                            | 2.65812900  | -3.83805600 | 3.63718000  | H | -3.08862500 | 4.25326500  | -1.70823600 |
| H                                                            | 0.92575000  | -4.09447700 | 3.80307400  | C | -2.76963100 | 2.21011200  | -1.05016000 |
| C                                                            | 1.65705700  | -2.28085900 | 4.75585700  | H | -3.05896800 | 2.41699000  | -0.01617700 |
| H                                                            | 0.64747800  | -1.84839600 | 4.82133900  | H | -1.67447500 | 2.29900100  | -1.08720800 |
| H                                                            | 1.85636000  | -2.76133800 | 5.72282800  | C | -2.54725400 | -2.13414500 | -1.07332500 |
| C                                                            | 2.66930200  | -1.15665500 | 4.49501000  | H | -2.00773300 | -2.01845100 | -2.02461700 |
| H                                                            | 3.68904300  | -1.56693800 | 4.55090000  | C | -1.83146200 | -3.25975200 | -0.29876700 |
| H                                                            | 2.59921900  | -0.39151700 | 5.27959700  | H | -0.78802500 | -2.97457200 | -0.11840400 |
| C                                                            | 2.45295200  | -0.51145700 | 3.11653300  | H | -2.30476400 | -3.38652100 | 0.68471800  |
| H                                                            | 3.20321200  | 0.26852800  | 2.94388500  | C | -1.89655500 | -4.59330500 | -1.06256400 |
| <b>2<sub>SP</sub> [Pd(SPhos)<sub>2</sub>] (conformer cc)</b> |             |             |             | H | -1.32734800 | -4.50101300 | -1.99996000 |
| Pd                                                           | 0.00012900  | 0.00023200  | -0.00066800 | H | -1.40621400 | -5.38161600 | -0.47608500 |
| P                                                            | -2.27447800 | -0.43934100 | -0.26670000 | C | -3.34341700 | -4.99272600 | -1.38646900 |
| P                                                            | 2.27474500  | 0.43989000  | 0.26531000  | H | -3.87819000 | -5.20223700 | -0.44786700 |
| O                                                            | -4.66157600 | 2.48976800  | 1.75010200  | H | -3.36307600 | -5.92120300 | -1.97243500 |
| O                                                            | -6.56197000 | -1.53677400 | 0.29158400  | C | -4.06955000 | -3.86946000 | -2.14010600 |
| C                                                            | -3.21391100 | -0.57711500 | 1.35809300  | H | -3.60972200 | -3.74460700 | -3.13237100 |
| C                                                            | -4.54379200 | -0.24782600 | 1.72860800  | H | -5.11814200 | -4.14544100 | -2.31757100 |
| C                                                            | -5.55027500 | 0.49396500  | 0.89639600  | C | -4.00075100 | -2.53385300 | -1.37621000 |
| C                                                            | -5.60603700 | 1.90143500  | 0.95785600  | H | -4.55291800 | -2.61933800 | -0.43411500 |
| C                                                            | -6.58174100 | 2.62337900  | 0.25580200  | H | -4.50768500 | -1.75418400 | -1.95826600 |
| H                                                            | -6.60753800 | 3.70554200  | 0.28979600  | O | 4.65831900  | -2.49629400 | -1.73693900 |
| C                                                            | -7.53540100 | 1.92842700  | -0.48449600 | O | 6.56608400  | 1.53415700  | -0.29890900 |
| H                                                            | -8.29034300 | 2.48282100  | -1.03552100 | C | 3.21483000  | 0.57213500  | -1.35956500 |
| C                                                            | -7.55180000 | 0.53642900  | -0.51545300 | C | 4.54487600  | 0.24162200  | -1.72838400 |
| H                                                            | -8.32283400 | 0.01893400  | -1.07256900 | C | 5.55075300  | -0.49782400 | -0.89336700 |
| C                                                            | -6.57600000 | -0.17417700 | 0.19953400  | C | 5.60415900  | -1.90567500 | -0.94805400 |
| C                                                            | -4.98851000 | -0.56718400 | 3.02457600  | C | 6.57906900  | -2.62580500 | -0.24303700 |
| H                                                            | -6.00810100 | -0.30379600 | 3.29295500  | H | 6.60310700  | -3.70815900 | -0.27183000 |
| C                                                            | -4.17152600 | -1.19036600 | 3.96194400  | C | 7.53425500  | -1.92884400 | 0.49339900  |
| H                                                            | -4.55547900 | -1.42166700 | 4.95222200  | H | 8.28857500  | -2.48180500 | 1.04670900  |
| C                                                            | -2.85475500 | -1.48724900 | 3.61804400  | C | 7.55297600  | -0.53674500 | 0.51758700  |
| H                                                            | -2.18277800 | -1.94942700 | 4.33673600  | H | 8.32514600  | -0.01782700 | 1.07180000  |
| C                                                            | -2.39415100 | -1.16945100 | 2.34336300  | C | 6.57795900  | 0.17199900  | -0.20031300 |
| H                                                            | -1.35430500 | -1.36363900 | 2.09157000  | C | 4.99020500  | 0.55673100  | -3.02517700 |
| C                                                            | -7.57104200 | -2.27468800 | -0.37728000 | H | 6.00990700  | 0.29242600  | -3.29222700 |
| H                                                            | -8.57234400 | -2.01261200 | -0.01107400 | C | 4.17364700  | 1.17683400  | -3.96496300 |
| H                                                            | -7.36870400 | -3.32379100 | -0.15408500 | H | 4.55806000  | 1.40488800  | -4.95581600 |
|                                                              |             |             |             | C | 2.85670700  | 1.47481000  | -3.62266100 |

|   |            |             |             |
|---|------------|-------------|-------------|
| H | 2.18506600 | 1.93462600  | -4.34318000 |
| C | 2.39550100 | 1.16118300  | -2.34715900 |
| H | 1.35556400 | 1.35629400  | -2.09642100 |
| C | 7.57674200 | 2.27364500  | 0.36580700  |
| H | 8.57741200 | 2.00815500  | 0.00032700  |
| H | 7.37599800 | 3.32198400  | 0.13763700  |
| H | 7.53842700 | 2.12677400  | 1.45311300  |
| C | 4.69159100 | -3.90516200 | -1.90184900 |
| H | 4.51580700 | -4.42841700 | -0.95315800 |
| H | 3.88379600 | -4.14000100 | -2.59699800 |
| H | 5.64777300 | -4.23672700 | -2.32754200 |
| C | 3.14586000 | -0.75666900 | 1.43459700  |
| H | 4.23102900 | -0.63467000 | 1.34383900  |
| C | 2.74498500 | -0.48541100 | 2.90296800  |
| H | 1.64886400 | -0.52151300 | 2.98892000  |
| H | 3.05238700 | 0.51821600  | 3.21509600  |
| C | 3.36918400 | -1.51463100 | 3.86216800  |
| H | 3.04274800 | -1.30339000 | 4.88916200  |
| H | 4.46336100 | -1.39846300 | 3.85172200  |
| C | 3.01295200 | -2.95504300 | 3.47340500  |
| H | 1.93050800 | -3.10700300 | 3.59872500  |
| H | 3.51004200 | -3.66608500 | 4.14651200  |
| C | 3.39678400 | -3.23519300 | 2.01372200  |
| H | 4.49155000 | -3.20456400 | 1.91336800  |
| H | 3.08192500 | -4.24790400 | 1.72624800  |
| C | 2.76583800 | -2.20701200 | 1.05976200  |
| H | 3.05344300 | -2.41887800 | 0.02629200  |
| H | 1.67056800 | -2.29367100 | 1.09862500  |
| C | 2.54774600 | 2.13723300  | 1.06639000  |
| H | 2.01046900 | 2.02397000  | 2.01923400  |
| C | 1.82933600 | 3.25982100  | 0.28987200  |
| H | 0.78572700 | 2.97324600  | 0.11275500  |
| H | 2.30033700 | 3.38375000  | -0.69508900 |
| C | 1.89514200 | 4.59588900  | 1.04920800  |
| H | 1.32803500 | 4.50622200  | 1.98813100  |
| H | 1.40295200 | 5.38194800  | 0.46125600  |
| C | 3.34240300 | 4.99743500  | 1.36870500  |
| H | 3.87498800 | 5.20441400  | 0.42829900  |
| H | 3.36260400 | 5.92776200  | 1.95171200  |
| C | 4.07103400 | 3.87710800  | 2.12429500  |
| H | 3.61345400 | 3.75503400  | 3.11794500  |
| H | 5.11979900 | 4.15443700  | 2.29860600  |
| C | 4.00158300 | 2.53906500  | 1.36474400  |
| H | 4.55154200 | 2.62204400  | 0.42113900  |
| H | 4.51047400 | 1.76161700  | 1.94806000  |

**3<sub>Cy</sub> [Pd(PCy<sub>3</sub>)(PhBr)] (conformer F)**

|    |             |             |             |
|----|-------------|-------------|-------------|
| Pd | 0.55591200  | -1.02794800 | -0.64257400 |
| Br | 5.52880600  | 0.45133100  | 0.24174700  |
| P  | -1.30883500 | 0.15961800  | 0.03466700  |
| C  | -0.02825400 | 4.19389000  | -0.19710400 |
| C  | -0.35814400 | 2.74762900  | -0.60406300 |
| C  | -0.96006000 | 1.93821200  | 0.56663000  |
| C  | -0.01483200 | 1.99477900  | 1.78676000  |
| C  | 0.31795000  | 3.44199100  | 2.18974800  |
| C  | 0.90714700  | 4.23880900  | 1.01833900  |
| H  | -0.96059100 | 4.72733800  | 0.04209100  |

|   |             |             |             |
|---|-------------|-------------|-------------|
| H | 0.42266800  | 4.72122400  | -1.04776500 |
| H | -1.04270700 | 2.75750500  | -1.46036300 |
| H | 0.55834500  | 2.24355100  | -0.94200400 |
| H | -1.91569200 | 2.40147600  | 0.85155100  |
| H | -0.45908000 | 1.47915100  | 2.64596300  |
| H | 0.91227100  | 1.45704500  | 1.54268900  |
| H | -0.59781500 | 3.94022200  | 2.54221600  |
| H | 1.01523100  | 3.43506200  | 3.03732900  |
| H | 1.88160900  | 3.81025400  | 0.74203000  |
| H | 1.09448100  | 5.27768700  | 1.31882300  |
| C | -4.51034000 | 1.56224000  | -2.49611900 |
| C | -3.72124600 | 1.39017900  | -1.18427100 |
| C | -2.56955700 | 0.37680000  | -1.36409100 |
| C | -3.12080200 | -0.97552100 | -1.86558900 |
| C | -3.91149300 | -0.80534200 | -3.17404400 |
| C | -5.04338300 | 0.22123000  | -3.02108200 |
| H | -3.85385500 | 2.01392100  | -3.25470800 |
| H | -5.33747200 | 2.26721200  | -2.34080600 |
| H | -4.40727700 | 1.04550000  | -0.40118600 |
| H | -3.34175200 | 2.36576700  | -0.85954400 |
| H | -1.92180400 | 0.76204000  | -2.16643800 |
| H | -2.29616700 | -1.68465000 | -2.00813200 |
| H | -3.78588400 | -1.40738600 | -1.10486000 |
| H | -3.22516400 | -0.47579300 | -3.96829000 |
| H | -4.31620800 | -1.77455700 | -3.49314500 |
| H | -5.79268300 | -0.16997700 | -2.31650300 |
| H | -5.56099300 | 0.36581100  | -3.97803800 |
| C | -2.71655000 | -2.70802900 | 2.83127300  |
| C | -2.29467900 | -2.11722300 | 1.47455900  |
| C | -2.14452200 | -0.58254300 | 1.56120400  |
| C | -3.45549100 | 0.05740400  | 2.06060200  |
| C | -3.87049700 | -0.52797800 | 3.42327400  |
| C | -4.00279000 | -2.05678000 | 3.36160400  |
| H | -1.90510200 | -2.55305600 | 3.55810500  |
| H | -2.84976200 | -3.79375900 | 2.73943600  |
| H | -3.04915900 | -2.37718600 | 0.72019200  |
| H | -1.34951300 | -2.56166900 | 1.14018200  |
| H | -1.37655100 | -0.39891500 | 2.32775600  |
| H | -3.35803500 | 1.14694900  | 2.13772500  |
| H | -4.25769900 | -0.13806500 | 1.33707700  |
| H | -3.11641400 | -0.25731000 | 4.17716400  |
| H | -4.81567000 | -0.07565500 | 3.75070600  |
| H | -4.83999000 | -2.31843300 | 2.69724500  |
| H | -4.25346500 | -2.45738600 | 4.35217700  |
| C | 2.14940100  | -2.54932300 | -1.12326900 |
| C | 2.44610700  | -1.40900500 | -1.90921400 |
| C | 2.85458600  | -2.75205900 | 0.08893300  |
| C | 3.45021000  | -0.50386100 | -1.48853200 |
| H | 2.03153300  | -1.30366700 | -2.90805700 |
| C | 3.85197700  | -1.87175600 | 0.49089400  |
| H | 2.63855700  | -3.62902000 | 0.69280700  |
| C | 4.14018800  | -0.75743900 | -0.31296800 |
| H | 3.69182300  | 0.35961800  | -2.09868200 |
| H | 4.40320000  | -2.04073000 | 1.40936200  |
| H | 1.51961000  | -3.34318100 | -1.51770000 |

**3<sub>Cy</sub> [Pd(PCy<sub>3</sub>)(PhBr)] (conformer C)**

|    |             |             |             |                                                                 |             |             |             |
|----|-------------|-------------|-------------|-----------------------------------------------------------------|-------------|-------------|-------------|
| Pd | -0.42785400 | -1.11584200 | -0.48794400 | H                                                               | 2.29151200  | -4.21484300 | 1.31043500  |
| Br | -5.25070400 | 1.08710100  | -0.28803500 | H                                                               | 1.85248200  | -3.47524700 | 3.64171000  |
| P  | 1.43280200  | 0.04506800  | 0.27198600  | H                                                               | 0.33596700  | -3.95498100 | 2.88268200  |
| C  | -2.16967000 | -2.42035600 | -1.00353600 | H                                                               | -0.23598500 | -1.58796600 | 2.42341500  |
| C  | -2.99651700 | -2.40012200 | 0.14915000  | H                                                               | 0.10828700  | -1.78189200 | 4.14438500  |
| C  | -3.90294700 | -1.36911500 | 0.36161600  | H                                                               | 2.39957800  | -0.92212300 | 3.84094500  |
| C  | -3.98081900 | -0.32723900 | -0.57707500 | H                                                               | 1.23228500  | 0.25734400  | 3.27838100  |
| C  | -3.16697000 | -0.28953000 | -1.69832400 | H                                                               | -1.62731800 | -3.32764500 | -1.26157100 |
| C  | -2.25022300 | -1.34377200 | -1.92176900 | <b>3<sub>Cy</sub> [Pd(PCy<sub>3</sub>)(PhCl)] (conformer F)</b> |             |             |             |
| C  | 2.74547400  | 0.40993200  | -1.05583100 | Pd                                                              | 0.98466500  | -0.97671700 | -0.60834700 |
| C  | 4.20316400  | 0.61429600  | -0.58778300 | P                                                               | -0.92628300 | 0.14298100  | 0.04798000  |
| C  | 5.11125000  | 1.03219500  | -1.75957200 | Cl                                                              | 5.75661900  | 0.68148000  | 0.27729300  |
| C  | 5.05960000  | 0.01557000  | -2.90855700 | C                                                               | 0.32239200  | 4.19205800  | 0.12002200  |
| C  | 3.61463500  | -0.22276100 | -3.36968200 | C                                                               | 0.02549200  | 2.77087000  | -0.38862700 |
| C  | 2.70086600  | -0.62752700 | -2.20066300 | C                                                               | -0.62024300 | 1.88740200  | 0.70252900  |
| C  | 0.96592800  | 1.75623900  | 0.93384400  | C                                                               | 0.27142400  | 1.87673900  | 1.96366500  |
| C  | 0.13012700  | 2.54477300  | -0.09855100 | C                                                               | 0.57214100  | 3.29876900  | 2.46935200  |
| C  | -0.41848500 | 3.85095400  | 0.50135800  | C                                                               | 1.20308700  | 4.17088800  | 1.37616300  |
| C  | 0.70003900  | 4.72726800  | 1.08338000  | H                                                               | -0.62522700 | 4.70236400  | 0.34950300  |
| C  | 1.54447000  | 3.94489900  | 2.09874600  | H                                                               | 0.80433000  | 4.77401200  | -0.67629000 |
| C  | 2.09836000  | 2.64264200  | 1.49099100  | H                                                               | -0.61874400 | 2.83034400  | -1.27388600 |
| C  | 2.41491500  | -0.71651100 | 1.70502300  | H                                                               | 0.96094300  | 2.29400800  | -0.71429600 |
| C  | 2.92374400  | -2.14648700 | 1.38771900  | H                                                               | -1.59224200 | 2.32502200  | 0.97156700  |
| C  | 1.83903600  | -3.23034700 | 1.48874200  | H                                                               | -0.20227400 | 1.30441600  | 2.76980200  |
| C  | 1.13454100  | -3.20246200 | 2.85268100  | H                                                               | 1.21330600  | 1.36260800  | 1.72565800  |
| C  | 0.56273900  | -1.80762700 | 3.14524000  | H                                                               | -0.36270300 | 3.76738000  | 2.81225400  |
| C  | 1.65361400  | -0.72906600 | 3.05424100  | H                                                               | 1.23261800  | 3.24403500  | 3.34427800  |
| H  | -2.94776500 | -3.22373900 | 0.85610500  | H                                                               | 2.19352400  | 3.76878400  | 1.11780900  |
| H  | -4.54557800 | -1.36734300 | 1.23525300  | H                                                               | 1.36486300  | 5.19109800  | 1.74725400  |
| H  | -3.24564500 | 0.52180000  | -2.41382000 | C                                                               | -4.00612400 | 1.69315000  | -2.54464100 |
| H  | -1.73939300 | -1.39662500 | -2.87905600 | C                                                               | -3.28135400 | 1.44432900  | -1.20844000 |
| H  | 2.39786500  | 1.36444200  | -1.47991900 | C                                                               | -2.12246500 | 0.44010700  | -1.39162400 |
| H  | 4.58935300  | -0.32170200 | -0.16266200 | C                                                               | -2.64798200 | -0.88101800 | -1.99395100 |
| H  | 4.26296700  | 1.36553400  | 0.20632000  | C                                                               | -3.37787200 | -0.63514900 | -3.32574600 |
| H  | 4.79062100  | 2.01708100  | -2.13067600 | C                                                               | -4.51495500 | 0.38509400  | -3.16775300 |
| H  | 6.14233800  | 1.15399100  | -1.40277000 | H                                                               | -3.31371300 | 2.18382700  | -3.24481900 |
| H  | 5.49296100  | -0.93669400 | -2.56777600 | H                                                               | -4.83902600 | 2.39138200  | -2.38966200 |
| H  | 5.67843100  | 0.35745400  | -3.74808000 | H                                                               | -4.00422900 | 1.05751200  | -0.48069200 |
| H  | 3.22465800  | 0.69870200  | -3.82790200 | H                                                               | -2.91672000 | 2.39823200  | -0.81026200 |
| H  | 3.58476700  | -0.99494900 | -4.14928200 | H                                                               | -1.43991400 | 0.87004400  | -2.14030300 |
| H  | 3.01519700  | -1.60995600 | -1.81894800 | H                                                               | -1.81665200 | -1.58192200 | -2.13827400 |
| H  | 1.66714600  | -0.75095400 | -2.54399600 | H                                                               | -3.34701300 | -1.35498400 | -1.29073800 |
| H  | 0.28639800  | 1.51344200  | 1.76407700  | H                                                               | -2.65553500 | -0.26357400 | -4.06773100 |
| H  | -0.69156500 | 1.91776300  | -0.46303200 | H                                                               | -3.76789000 | -1.58360300 | -3.71731500 |
| H  | 0.75315600  | 2.78856600  | -0.97239400 | H                                                               | -5.29586400 | -0.04200300 | -2.52077800 |
| H  | -0.97769900 | 4.40387000  | -0.26430200 | H                                                               | -4.98821100 | 0.58418900  | -4.13782000 |
| H  | -1.13832400 | 3.60465500  | 1.29581500  | C                                                               | -2.43040700 | -2.90358900 | 2.59370900  |
| H  | 0.27793400  | 5.62615200  | 1.55072200  | C                                                               | -1.94516400 | -2.22725200 | 1.29958400  |
| H  | 1.34948900  | 5.07540000  | 0.26605800  | C                                                               | -1.83178500 | -0.69732400 | 1.48201300  |
| H  | 2.37344400  | 4.56425400  | 2.46556000  | C                                                               | -3.18353300 | -0.11241100 | 1.93870700  |
| H  | 0.92618800  | 3.69992800  | 2.97506600  | C                                                               | -3.66202200 | -0.78266000 | 3.24036600  |
| H  | 2.68372000  | 2.10696100  | 2.24803700  | C                                                               | -3.75789800 | -2.30757100 | 3.08604300  |
| H  | 2.79230000  | 2.90325500  | 0.68008200  | H                                                               | -1.66465000 | -2.77670400 | 3.37362500  |
| H  | 3.29401400  | -0.07432600 | 1.83304200  | H                                                               | -2.53511500 | -3.98433300 | 2.43245600  |
| H  | 3.71980500  | -2.37630100 | 2.11295800  | H                                                               | -2.65127400 | -2.45560600 | 0.48971300  |
| H  | 3.39462000  | -2.18438200 | 0.39864800  | H                                                               | -0.97412700 | -2.63515500 | 0.99360300  |
| H  | 1.09448900  | -3.06981200 | 0.69499400  |                                                                 |             |             |             |

|   |             |             |             |
|---|-------------|-------------|-------------|
| H | -1.11565000 | -0.54338200 | 2.30321700  |
| H | -3.11726900 | 0.97281500  | 2.08262800  |
| H | -3.93806100 | -0.28358100 | 1.16009700  |
| H | -2.95736000 | -0.54199300 | 4.05015400  |
| H | -4.63356500 | -0.36708600 | 3.53797400  |
| H | -4.55186400 | -2.54667000 | 2.36267600  |
| H | -4.05382000 | -2.76847200 | 4.03715300  |
| C | 2.67200600  | -2.40309300 | -1.05599900 |
| C | 2.91947000  | -1.25675000 | -1.85014800 |
| C | 3.36869000  | -2.55478400 | 0.16870200  |
| C | 3.86720700  | -0.29574600 | -1.42573700 |
| H | 2.51131000  | -1.18370100 | -2.85438100 |
| C | 4.31053600  | -1.61727300 | 0.57442500  |
| H | 3.19003600  | -3.43581900 | 0.77866900  |
| C | 4.55259100  | -0.49690700 | -0.23664800 |
| H | 4.07576900  | 0.57389200  | -2.03948200 |
| H | 4.85889500  | -1.74245700 | 1.50173800  |
| H | 2.09086300  | -3.23308400 | -1.45059400 |

### **3<sub>H</sub> [Pd(PH<sub>3</sub>)(PhBr)]**

|    |             |             |             |
|----|-------------|-------------|-------------|
| Pd | 1.78098800  | 0.12559500  | 0.08019900  |
| Br | -3.37925800 | -0.78273700 | -0.03879500 |
| P  | 3.40116600  | -1.39249000 | -0.28075300 |
| C  | 0.44644000  | 1.97109000  | 0.12083100  |
| C  | -0.32224200 | 1.86889600  | -1.06293900 |
| C  | -1.45342900 | 1.06067200  | -1.11011100 |
| C  | -1.81218900 | 0.32299200  | 0.02739200  |
| C  | -1.06302000 | 0.36953300  | 1.19563000  |
| C  | 0.07283200  | 1.20833200  | 1.25299200  |
| H  | 1.21660200  | 2.73409400  | 0.20005100  |
| H  | -0.04527900 | 2.45633800  | -1.93351300 |
| H  | -2.05179900 | 0.99926200  | -2.01239600 |
| H  | -1.35705600 | -0.20647200 | 2.06599200  |
| H  | 0.56693700  | 1.36104100  | 2.20841800  |
| H  | 4.65565400  | -1.27931500 | 0.37176500  |
| H  | 3.20383500  | -2.76538800 | 0.01668100  |
| H  | 3.93185700  | -1.60286600 | -1.57980200 |

### **3<sub>H</sub> [Pd(PH<sub>3</sub>)(PhCl)]**

|    |             |             |             |
|----|-------------|-------------|-------------|
| Pd | 1.25512900  | 0.17560800  | 0.07956300  |
| Cl | -3.61720800 | -1.33123200 | -0.08470300 |
| P  | 3.06442000  | -1.10899700 | -0.28092600 |
| C  | -0.32605200 | 1.81155800  | 0.14601500  |
| C  | -1.06146300 | 1.61991900  | -1.04797700 |
| C  | -2.06850800 | 0.66368000  | -1.11740600 |
| C  | -2.33543900 | -0.13214900 | 0.00628400  |
| C  | -1.61077500 | 0.00382900  | 1.18364500  |
| C  | -0.60207300 | 0.98864400  | 1.26411400  |
| H  | 0.33030900  | 2.67253100  | 0.24404400  |
| H  | -0.85923600 | 2.25159800  | -1.90796100 |
| H  | -2.64593800 | 0.52848100  | -2.02550600 |
| H  | -1.83557300 | -0.62070600 | 2.04138200  |
| H  | -0.14016700 | 1.19350000  | 2.22567500  |
| H  | 4.30407800  | -0.80158600 | 0.33667500  |
| H  | 3.07017800  | -2.48653800 | 0.05824300  |
| H  | 3.59252400  | -1.28221400 | -1.58664100 |

### **3<sub>Ph</sub> [Pd(PPh<sub>3</sub>)(PhBr)]**

|    |             |             |             |
|----|-------------|-------------|-------------|
| Pd | 0.54571600  | -1.12730200 | 0.33134600  |
| Br | 5.32944800  | 1.00439300  | -0.04054500 |
| P  | -1.42313100 | -0.00246800 | 0.01371400  |
| C  | 2.28021400  | -2.58584400 | 0.24633000  |
| C  | 2.95248800  | -2.30071000 | -0.96693800 |
| C  | 3.85643200  | -1.24807800 | -1.05078000 |
| C  | 4.07736600  | -0.44817800 | 0.08098300  |
| C  | 3.41393700  | -0.67400500 | 1.27811400  |
| C  | 2.51170900  | -1.76007100 | 1.37240200  |
| H  | 1.72269400  | -3.51359000 | 0.34784500  |
| H  | 2.78583600  | -2.93507800 | -1.83287100 |
| H  | 4.38407100  | -1.04394500 | -1.97589900 |
| H  | 3.60057600  | -0.04760700 | 2.14337400  |
| H  | 2.12215200  | -2.03519800 | 2.34874400  |
| C  | -2.78226400 | -1.00573500 | -0.74545700 |
| C  | -2.43428500 | -1.92938500 | -1.74517200 |
| C  | -4.13015500 | -0.88783100 | -0.37467300 |
| C  | -3.41149000 | -2.70344400 | -2.37028600 |
| H  | -1.38921500 | -2.04312300 | -2.02328800 |
| C  | -5.10693900 | -1.67198700 | -0.99417800 |
| H  | -4.42006800 | -0.18747300 | 0.40266700  |
| C  | -4.75127100 | -2.57811300 | -1.99419800 |
| H  | -3.12550400 | -3.41244100 | -3.14289800 |
| H  | -6.14647700 | -1.57311800 | -0.69229500 |
| H  | -5.51219900 | -3.18828000 | -2.47363100 |
| C  | -2.19731600 | 0.65701900  | 1.56115100  |
| C  | -2.88698900 | 1.87700800  | 1.62277100  |
| C  | -2.07983000 | -0.11325900 | 2.73013000  |
| C  | -3.45057300 | 2.31256400  | 2.82497200  |
| H  | -2.98080000 | 2.49329400  | 0.73401900  |
| C  | -2.65287700 | 0.31698500  | 3.92653500  |
| H  | -1.52475700 | -1.04781000 | 2.69573600  |
| C  | -3.33811700 | 1.53361500  | 3.97745600  |
| H  | -3.97672400 | 3.26314500  | 2.85820900  |
| H  | -2.55378300 | -0.29157300 | 4.82165500  |
| H  | -3.77544300 | 1.87520000  | 4.91191700  |
| C  | -1.32988100 | 1.48132500  | -1.08968700 |
| C  | -2.37709800 | 1.88613900  | -1.93164100 |
| C  | -0.14286500 | 2.23225800  | -1.07591900 |
| C  | -2.24156100 | 3.02103900  | -2.73488300 |
| H  | -3.29830900 | 1.31233400  | -1.96779000 |
| C  | -0.01290400 | 3.37099800  | -1.87121100 |
| H  | 0.68293000  | 1.91035200  | -0.44613700 |
| C  | -1.06194500 | 3.76694800  | -2.70429800 |
| H  | -3.05901900 | 3.31960500  | -3.38621400 |
| H  | 0.91221800  | 3.94089400  | -1.84881400 |
| H  | -0.95753900 | 4.64801300  | -3.33204400 |

### **3<sub>Ph</sub> [Pd(PPh<sub>3</sub>)(PhCl)]**

|    |             |             |             |
|----|-------------|-------------|-------------|
| Pd | 1.03696600  | -0.94272300 | 0.40574300  |
| P  | -1.01962700 | -0.01971900 | 0.01921600  |
| Cl | 5.49897200  | 1.49457900  | -0.17018600 |
| C  | 2.91184700  | -2.21604900 | 0.40517400  |
| C  | 3.53897000  | -1.95464300 | -0.83749200 |
| C  | 4.33152400  | -0.82683200 | -1.01135400 |
| C  | 4.48678100  | 0.07176300  | 0.05569400  |

|                                                       |             |             |             |   |             |             |             |
|-------------------------------------------------------|-------------|-------------|-------------|---|-------------|-------------|-------------|
| C                                                     | 3.86128000  | -0.13285100 | 1.27744200  | H | -1.36018700 | 0.34207700  | -2.60663500 |
| C                                                     | 3.07218900  | -1.29108300 | 1.46469100  | H | -2.92596600 | 0.90367300  | -2.03608900 |
| H                                                     | 2.45228900  | -3.18506200 | 0.58368100  | C | -1.46951000 | -2.57806000 | 1.39564000  |
| H                                                     | 3.42616800  | -2.66305400 | -1.65310000 | C | -2.74969900 | -2.40093300 | -0.64817500 |
| H                                                     | 4.82814900  | -0.63522500 | -1.95644200 | C | -2.28162200 | -3.65737000 | -1.05877500 |
| H                                                     | 3.99872200  | 0.57245500  | 2.08994200  | H | -2.59378900 | -4.09027800 | -2.00132300 |
| H                                                     | 2.72014200  | -1.53121500 | 2.46417100  | C | -1.25738600 | 2.10850100  | -1.34975000 |
| C                                                     | -2.34201200 | -1.22818200 | -0.45091400 | H | -0.26768800 | 2.37998800  | -1.74677100 |
| C                                                     | -1.99798000 | -2.26044600 | -1.34047200 | C | -4.09708600 | -2.16075200 | -2.61133200 |
| C                                                     | -3.65506200 | -1.16832700 | 0.03798500  | H | -3.27515800 | -2.30445000 | -3.32485900 |
| C                                                     | -2.94686400 | -3.19935600 | -1.74250700 | H | -4.78633300 | -1.41025500 | -3.00252300 |
| H                                                     | -0.97641100 | -2.32924000 | -1.70688300 | H | -4.63216200 | -3.11061100 | -2.48013800 |
| C                                                     | -4.60229400 | -2.11731700 | -0.35691500 | C | 0.03778200  | 2.26933300  | 1.33077300  |
| H                                                     | -3.94164900 | -0.38281300 | 0.73039600  | H | -0.65503400 | 3.09548900  | 1.54328900  |
| C                                                     | -4.25252700 | -3.13175300 | -1.24858400 | C | -4.35002200 | 1.59457000  | 2.24207600  |
| H                                                     | -2.66434100 | -3.99082200 | -2.43185700 | H | -4.86243800 | 2.44170600  | 2.69074400  |
| H                                                     | -5.61457800 | -2.06065900 | 0.03514400  | C | -1.41612900 | -4.36263400 | -0.22444800 |
| H                                                     | -4.99014600 | -3.86969100 | -1.55284300 | H | -1.06393400 | -5.34437100 | -0.53082800 |
| C                                                     | -1.75854100 | 0.87968800  | 1.45979600  | C | -2.04821300 | 3.40964100  | -1.11410100 |
| C                                                     | -2.57310900 | 2.01450500  | 1.32828000  | H | -1.54296300 | 4.04796700  | -0.37852500 |
| C                                                     | -1.48532100 | 0.38854700  | 2.74703500  | H | -3.03577900 | 3.16657300  | -0.70201300 |
| C                                                     | -3.10594500 | 2.63862800  | 2.45892900  | C | -1.00359500 | -3.84087200 | 1.00002800  |
| H                                                     | -2.78758700 | 2.41821100  | 0.34349700  | H | -0.33937900 | -4.41379900 | 1.63537200  |
| C                                                     | -2.02670200 | 1.00616300  | 3.87448300  | C | 0.37208400  | 1.56956400  | 2.66530600  |
| H                                                     | -0.83589700 | -0.47690100 | 2.85625400  | H | -0.54168300 | 1.17776600  | 3.12674100  |
| C                                                     | -2.83735200 | 2.13498800  | 3.73276100  | H | 1.01270700  | 0.70152800  | 2.45356200  |
| H                                                     | -3.73069800 | 3.52042800  | 2.34189800  | C | -0.22374200 | -2.64901500 | 3.43709000  |
| H                                                     | -1.80610600 | 0.61304200  | 4.86353900  | H | -0.59653600 | -3.62751000 | 3.76843900  |
| H                                                     | -3.25150400 | 2.62350300  | 4.61088100  | H | -0.10464700 | -1.99774200 | 4.30453800  |
| C                                                     | -1.09128600 | 1.22678600  | -1.34733000 | H | 0.74719200  | -2.77522300 | 2.94136800  |
| C                                                     | -2.20388800 | 1.38809400  | -2.18739400 | C | -2.92666300 | 3.33648100  | -3.49837600 |
| C                                                     | 0.03092300  | 2.04804200  | -1.54336400 | H | -3.95152000 | 3.10554500  | -3.17154300 |
| C                                                     | -2.19558400 | 2.35556000  | -3.19507300 | H | -3.01602400 | 3.89868700  | -4.43699500 |
| H                                                     | -3.07672800 | 0.75429700  | -2.06042400 | C | -2.23843300 | 4.19314500  | -2.42640200 |
| C                                                     | 0.03383900  | 3.02018300  | -2.54391400 | H | -2.81992300 | 5.10412400  | -2.23290200 |
| H                                                     | 0.90628000  | 1.91170200  | -0.91283500 | H | -1.25665700 | 4.52202100  | -2.79854500 |
| C                                                     | -1.07929100 | 3.17471100  | -3.37367400 | C | 1.31346200  | 2.87117700  | 0.70381000  |
| H                                                     | -3.06265400 | 2.46667100  | -3.84122000 | H | 1.07093700  | 3.41752000  | -0.21604600 |
| H                                                     | 0.91031700  | 3.64764400  | -2.68276800 | H | 1.98840100  | 2.05372100  | 0.41449800  |
| H                                                     | -1.07392200 | 3.92505100  | -4.15996900 | C | -2.16230900 | 2.02481200  | -3.72924200 |
| <b>3<sub>SP</sub> [Pd(SPhos)(PhBr)] (conformer a)</b> |             |             |             | H | -1.18117700 | 2.25256300  | -4.17280900 |
| Pd                                                    | 0.54501100  | -0.72602100 | -0.46296400 | H | -2.69428500 | 1.39737500  | -4.45681000 |
| Br                                                    | 5.82959600  | 0.14117100  | -0.57784400 | C | 4.19961300  | -0.85949700 | -0.79426200 |
| P                                                     | -0.79369900 | 1.05259600  | 0.15405400  | C | 3.35903400  | -0.56602300 | -1.85464600 |
| O                                                     | -3.63110900 | -1.64995700 | -1.37367200 | C | 2.17088500  | -1.31709900 | -2.02410100 |
| O                                                     | -1.15373800 | -1.99554900 | 2.58859600  | C | 1.85987700  | -2.36909000 | -1.12197000 |
| C                                                     | -2.97822600 | -0.57805600 | 1.08940000  | C | 2.73237400  | -2.60568500 | -0.02691200 |
| C                                                     | -2.41865900 | 0.71867900  | 1.00932700  | C | 3.89568500  | -1.86522600 | 0.13893900  |
| C                                                     | -3.12484700 | 1.78116300  | 1.60627200  | H | 3.61177700  | 0.21555800  | -2.56308600 |
| H                                                     | -2.70921800 | 2.78217300  | 1.58095600  | H | 1.60911600  | -1.19953200 | -2.94630500 |
| C                                                     | -4.90677300 | 0.31794000  | 2.29636400  | H | 2.50367800  | -3.40776700 | 0.66974400  |
| H                                                     | -5.86288100 | 0.15123800  | 2.78562600  | H | 4.56683300  | -2.06328900 | 0.96763300  |
| C                                                     | -2.34080300 | -1.83467500 | 0.57399400  | C | 1.09396900  | 2.51516600  | 3.63956800  |
| C                                                     | -4.21941200 | -0.74901100 | 1.72656900  | H | 0.41216000  | 3.32795500  | 3.93275300  |
| H                                                     | -4.63923400 | -1.74978200 | 1.77804800  | H | 1.34583300  | 1.97423700  | 4.56133300  |
| C                                                     | -1.95531400 | 1.24430800  | -2.42036800 | C | 2.35888700  | 3.11582200  | 3.01032400  |
|                                                       |             |             |             | H | 3.08787300  | 2.31282200  | 2.82676500  |



|   |            |             |             |
|---|------------|-------------|-------------|
| H | 2.83512500 | 3.81975800  | 3.70508200  |
| C | 2.03540800 | 3.81428600  | 1.68235400  |
| H | 2.95409900 | 4.19390100  | 1.21691800  |
| H | 1.39958100 | 4.69080900  | 1.87972100  |
| H | 1.08347600 | -3.09460000 | -1.35756200 |

**3<sub>SP</sub> [Pd(SPhos)(PhBr)] (conformer c)**

|    |             |             |             |
|----|-------------|-------------|-------------|
| Pd | 1.77167200  | 0.20599900  | 1.28301500  |
| Br | 5.94312800  | -0.92839000 | -1.72080100 |
| P  | -0.39917900 | 0.52911100  | 0.52032600  |
| O  | -2.00992600 | -3.11560800 | -1.02266500 |
| O  | -4.08880900 | 0.98029300  | -1.94520500 |
| C  | -0.64314500 | 0.00610200  | -1.26799900 |
| C  | -1.75570400 | -0.54722600 | -1.95436400 |
| C  | -3.03967100 | -1.03207000 | -1.34423200 |
| C  | -3.14815400 | -2.36888200 | -0.90928800 |
| C  | -4.35698600 | -2.87754100 | -0.41315400 |
| H  | -4.42990900 | -3.89947800 | -0.06216000 |
| C  | -5.47862500 | -2.05190600 | -0.38670000 |
| H  | -6.41632600 | -2.43881200 | 0.00303000  |
| C  | -5.42643700 | -0.74715800 | -0.87009100 |
| H  | -6.32032500 | -0.13574800 | -0.86907000 |
| C  | -4.21388200 | -0.25424500 | -1.37517500 |
| C  | -1.66666000 | -0.74321900 | -3.34455200 |
| H  | -2.52506200 | -1.17217700 | -3.85436900 |
| C  | -0.52642500 | -0.42094700 | -4.07294500 |
| H  | -0.49996100 | -0.58801800 | -5.14658000 |
| C  | 0.58107700  | 0.09225900  | -3.40236000 |
| H  | 1.49669600  | 0.32858300  | -3.93788100 |
| C  | 0.51553200  | 0.28503800  | -2.02515500 |
| H  | 1.39664200  | 0.64897900  | -1.50257600 |
| C  | -5.23899600 | 1.80433400  | -2.04376000 |
| H  | -6.02666400 | 1.32568200  | -2.63997400 |
| H  | -4.90887900 | 2.71532400  | -2.54611700 |
| H  | -5.64035900 | 2.06191500  | -1.05492100 |
| C  | -2.06681200 | -4.49737600 | -0.70271500 |
| H  | -2.29117800 | -4.65859900 | 0.35958900  |
| H  | -1.07421800 | -4.89268300 | -0.92483900 |
| H  | -2.81336600 | -5.01979400 | -1.31476500 |
| C  | -1.69001500 | -0.27370000 | 1.63403000  |
| H  | -2.65531400 | -0.28779700 | 1.11534100  |
| C  | -1.85358100 | 0.51410900  | 2.95401500  |
| H  | -0.87127000 | 0.60635500  | 3.44107100  |
| H  | -2.20835800 | 1.53215200  | 2.76193700  |
| C  | -2.83795300 | -0.18179300 | 3.91152200  |
| H  | -2.90784000 | 0.39172800  | 4.84518200  |
| H  | -3.84221500 | -0.17165200 | 3.46227900  |
| C  | -2.43212800 | -1.63237500 | 4.20341000  |
| H  | -1.48419300 | -1.63836100 | 4.76182800  |
| H  | -3.17896000 | -2.11436500 | 4.84781900  |
| C  | -2.25522400 | -2.42141400 | 2.89916700  |
| H  | -3.22935800 | -2.52304400 | 2.39912500  |
| H  | -1.90453500 | -3.43969500 | 3.11640500  |
| C  | -1.26375600 | -1.72438000 | 1.95254600  |
| H  | -1.14911500 | -2.29787300 | 1.02873500  |
| H  | -0.27057600 | -1.69144700 | 2.42320900  |
| C  | -0.86427300 | 2.36597900  | 0.51871200  |

|   |             |             |             |
|---|-------------|-------------|-------------|
| H | -0.73068900 | 2.63748900  | 1.57612200  |
| C | 0.14089000  | 3.21372100  | -0.28817700 |
| H | 1.16314300  | 2.98882200  | 0.03979400  |
| H | 0.07999400  | 2.94124900  | -1.35071100 |
| C | -0.14789900 | 4.71723500  | -0.13774000 |
| H | 0.02062300  | 5.01548800  | 0.90802000  |
| H | 0.56233200  | 5.29335200  | -0.74500400 |
| C | -1.59090900 | 5.06038300  | -0.53493200 |
| H | -1.72315500 | 4.87221800  | -1.61084500 |
| H | -1.78802600 | 6.12866200  | -0.37636900 |
| C | -2.59597000 | 4.20837200  | 0.25288600  |
| H | -2.54814600 | 4.48436800  | 1.31725700  |
| H | -3.62104000 | 4.42492700  | -0.07733200 |
| C | -2.30576500 | 2.70347900  | 0.10288700  |
| H | -2.45849500 | 2.40164000  | -0.93847800 |
| H | -3.02710900 | 2.12935700  | 0.69714400  |
| C | 5.04377700  | -0.44288500 | -0.09105300 |
| C | 5.19051800  | 0.86558300  | 0.39714500  |
| C | 4.54907800  | 1.21844300  | 1.57797600  |
| C | 3.77704000  | 0.27326300  | 2.29905000  |
| C | 3.63321900  | -1.03770600 | 1.77979100  |
| C | 4.27139400  | -1.38860600 | 0.56473200  |
| H | 5.79663800  | 1.58574200  | -0.14137600 |
| H | 4.67088800  | 2.22252500  | 1.97483800  |
| H | 3.18281300  | -1.82403100 | 2.37914900  |
| H | 4.17378100  | -2.39483900 | 0.17230700  |
| H | 3.45095300  | 0.50617500  | 3.30975300  |

**3<sub>SP</sub> [Pd(SPhos)(PhCl)] (conformer a)**

|    |             |             |             |
|----|-------------|-------------|-------------|
| Pd | 0.87189900  | -0.71840600 | -0.48931600 |
| P  | -0.46628800 | 1.04705400  | 0.15651700  |
| Cl | 5.96859000  | 0.23574700  | -0.99517000 |
| O  | -3.28675100 | -1.66151200 | -1.34552300 |
| O  | -0.79735700 | -2.01653000 | 2.60790600  |
| C  | -2.62857200 | -0.59739400 | 1.12003100  |
| C  | -2.07779700 | 0.70273000  | 1.03342300  |
| C  | -2.78233300 | 1.76050900  | 1.64061900  |
| H  | -2.37249300 | 2.76377700  | 1.61145600  |
| C  | -4.54710200 | 0.28667000  | 2.35170800  |
| H  | -5.49611000 | 0.11414100  | 2.85265400  |
| C  | -1.98997200 | -1.85047700 | 0.59716600  |
| C  | -3.86060700 | -0.77593100 | 1.77278300  |
| H  | -4.27381300 | -1.77920500 | 1.82911900  |
| C  | -1.66623100 | 1.25222500  | -2.40007900 |
| H  | -1.07298600 | 0.35157800  | -2.59930300 |
| H  | -2.63134600 | 0.90881600  | -2.00450700 |
| C  | -1.11534200 | -2.59546500 | 1.41363900  |
| C  | -2.40073900 | -2.41275500 | -0.62603900 |
| C  | -1.93065200 | -3.66636400 | -1.04304500 |
| H  | -2.24436300 | -4.09622600 | -1.98648200 |
| C  | -0.95447400 | 2.11094600  | -1.33431700 |
| H  | 0.02939500  | 2.38548500  | -1.74357500 |
| C  | -3.75139500 | -2.16629200 | -2.58605200 |
| H  | -2.92907500 | -2.30331400 | -3.30044400 |
| H  | -4.44286100 | -1.41550400 | -2.97276100 |
| H  | -4.28376800 | -3.11845800 | -2.46053200 |
| C  | 0.37618900  | 2.26146000  | 1.32814200  |

|                                                       |             |             |             |   |             |             |             |
|-------------------------------------------------------|-------------|-------------|-------------|---|-------------|-------------|-------------|
| H                                                     | -0.31636900 | 3.08480300  | 1.55212200  | C | 1.71043900  | -0.07451300 | 1.96519100  |
| C                                                     | -3.99831100 | 1.56648100  | 2.29166000  | C | 2.94845800  | -0.61782700 | 1.31149100  |
| H                                                     | -4.50978600 | 2.41031200  | 2.74759800  | C | 3.10958100  | -2.01095500 | 1.16778500  |
| C                                                     | -1.06056300 | -4.37252400 | -0.21435700 | C | 4.29224600  | -2.55763000 | 0.64939200  |
| H                                                     | -0.70618100 | -5.35181500 | -0.52600700 | H | 4.40444300  | -3.62752500 | 0.52440500  |
| C                                                     | -1.74340900 | 3.40969500  | -1.08042600 | C | 5.33764700  | -1.70412800 | 0.30406100  |
| H                                                     | -1.22844700 | 4.04486100  | -0.34881300 | H | 6.25468300  | -2.12190100 | -0.10259200 |
| H                                                     | -2.72456000 | 3.16305600  | -0.65523600 | C | 5.23748800  | -0.32751600 | 0.48894500  |
| C                                                     | -0.64630500 | -3.85486900 | 1.01138900  | H | 6.07544900  | 0.31221200  | 0.24108700  |
| H                                                     | 0.02215500  | -4.42826800 | 1.64183900  | C | 4.05277100  | 0.20592300  | 1.01823900  |
| C                                                     | 0.72811000  | 1.55713600  | 2.65578900  | C | 1.79729400  | 0.03492200  | 3.36505100  |
| H                                                     | -0.17937800 | 1.16242000  | 3.12700400  | H | 2.73886900  | -0.22839400 | 3.83926600  |
| H                                                     | 1.36701300  | 0.69054400  | 2.43302500  | C | 0.72697500  | 0.45193200  | 4.14920400  |
| C                                                     | 0.11168600  | -2.68639700 | 3.46575000  | H | 0.83695900  | 0.52425100  | 5.22808200  |
| H                                                     | -0.27763100 | -3.66277400 | 3.78410000  | C | -0.48682600 | 0.74792600  | 3.53349300  |
| H                                                     | 0.22517300  | -2.04244000 | 4.33942100  | H | -1.35050700 | 1.04900500  | 4.12041700  |
| H                                                     | 1.08919300  | -2.82188300 | 2.98543800  | C | -0.59545800 | 0.63546200  | 2.15022400  |
| C                                                     | -2.65475200 | 3.34891900  | -3.45301100 | H | -1.55701600 | 0.82712700  | 1.68086100  |
| H                                                     | -3.67474200 | 3.11433000  | -3.11383900 | C | 4.97655500  | 2.41433600  | 1.06862500  |
| H                                                     | -2.75759200 | 3.91648900  | -4.38702400 | H | 5.86041800  | 2.13329800  | 1.65593700  |
| C                                                     | -1.95348100 | 4.20044200  | -2.38541800 | H | 4.63094500  | 3.39998200  | 1.38522700  |
| H                                                     | -2.53400800 | 5.10910300  | -2.17844800 | H | 5.24618100  | 2.45017600  | 0.00500400  |
| H                                                     | -0.97762900 | 4.53361800  | -2.76910900 | C | 2.17083500  | -4.18176100 | 1.55286600  |
| C                                                     | 1.64251300  | 2.86906100  | 0.68785900  | H | 2.29503200  | -4.55986900 | 0.52986100  |
| H                                                     | 1.38703900  | 3.42012700  | -0.22564200 | H | 1.23738100  | -4.56571700 | 1.96765800  |
| H                                                     | 2.31445900  | 2.05426600  | 0.38447800  | H | 3.01226700  | -4.52221800 | 2.17017900  |
| C                                                     | -1.89160500 | 2.03989500  | -3.70162300 | C | 1.24047300  | -0.57402400 | -1.56090800 |
| H                                                     | -0.91672100 | 2.27158300  | -4.15679600 | H | 2.25033300  | -0.42056400 | -1.16441900 |
| H                                                     | -2.43228600 | 1.41588200  | -4.42574700 | C | 1.20738800  | -0.06559900 | -3.02065400 |
| C                                                     | 4.50154300  | -0.74036100 | -1.05446900 | H | 0.17807900  | -0.13303600 | -3.40338500 |
| C                                                     | 3.58645800  | -0.53447000 | -2.07437500 | H | 1.49720300  | 0.98903000  | -3.07507200 |
| C                                                     | 2.42070500  | -1.33284900 | -2.13221600 | C | 2.14556000  | -0.88582600 | -3.92467000 |
| C                                                     | 2.20278600  | -2.34587500 | -1.16117900 | H | 2.08013200  | -0.51251100 | -4.95516800 |
| C                                                     | 3.14654800  | -2.49335600 | -0.11088600 | H | 3.18461500  | -0.72712000 | -3.59964900 |
| C                                                     | 4.28883300  | -1.70535500 | -0.05580300 | C | 1.82838200  | -2.38616900 | -3.87757600 |
| H                                                     | 3.77168600  | 0.21801000  | -2.83376400 | H | 0.83260100  | -2.56033900 | -4.31173900 |
| H                                                     | 1.79661600  | -1.28000400 | -3.01956400 | H | 2.54258900  | -2.94550500 | -4.49598200 |
| H                                                     | 2.99153000  | -3.26571700 | 0.63751200  | C | 1.84662800  | -2.90171900 | -2.43209400 |
| H                                                     | 5.01802500  | -1.83383200 | 0.73712100  | H | 2.87128500  | -2.84599200 | -2.03699900 |
| C                                                     | 1.46091400  | 2.49975900  | 3.62467900  | H | 1.55477200  | -3.96047700 | -2.40269300 |
| H                                                     | 0.78213900  | 3.31093400  | 3.92913800  | C | 0.90506100  | -2.08248200 | -1.53416000 |
| H                                                     | 1.72461200  | 1.95574200  | 4.54131500  | H | 0.93252200  | -2.45863700 | -0.50788700 |
| C                                                     | 2.71735300  | 3.10401000  | 2.98210200  | H | -0.13076300 | -2.20604900 | -1.88199700 |
| H                                                     | 3.44446300  | 2.30226100  | 2.78597900  | C | 0.27472200  | 2.17808900  | -0.92211300 |
| H                                                     | 3.20200700  | 3.80523600  | 3.67380800  | H | 0.02669100  | 2.19377900  | -1.99344700 |
| C                                                     | 2.37647400  | 3.80801000  | 1.66142500  | C | -0.74411500 | 3.09747400  | -0.21755700 |
| H                                                     | 3.28888700  | 4.19020700  | 1.18588700  | H | -1.75988900 | 2.71575900  | -0.37742100 |
| H                                                     | 1.74291700  | 4.68335400  | 1.87096300  | H | -0.56380200 | 3.08116400  | 0.86600500  |
| H                                                     | 1.43981700  | -3.10728800 | -1.31197500 | C | -0.63269100 | 4.54587700  | -0.72321900 |
| <b>3<sub>SP</sub> [Pd(SPhos)(PhCl)] (conformer c)</b> |             |             |             | H | -0.91889000 | 4.58130700  | -1.78522700 |
| Pd                                                    | -2.19856300 | -0.27419700 | -0.88117700 | H | -1.34783400 | 5.18215200  | -0.18569600 |
| P                                                     | 0.00237100  | 0.35468300  | -0.48503100 | C | 0.79299900  | 5.09378000  | -0.56425900 |
| Cl                                                    | -6.02128300 | -0.77477500 | 2.46703000  | H | 1.03293400  | 5.16839200  | 0.50685700  |
| O                                                     | 2.04882100  | -2.76790800 | 1.57748200  | H | 0.86096800  | 6.11033000  | -0.97320700 |
| O                                                     | 3.89248000  | 1.53109900  | 1.30575300  | C | 1.81543800  | 4.17362000  | -1.24591900 |
| C                                                     | 0.48749300  | 0.25735600  | 1.32690100  | H | 1.65045700  | 4.19262700  | -2.33391100 |
|                                                       |             |             |             | H | 2.83504400  | 4.54734100  | -1.08041200 |

|   |             |             |             |
|---|-------------|-------------|-------------|
| C | 1.70174100  | 2.72342000  | -0.73988900 |
| H | 1.96954200  | 2.68163400  | 0.32159000  |
| H | 2.43072200  | 2.09305600  | -1.26326800 |
| C | -5.33561600 | -0.65410500 | 0.84859000  |
| C | -5.57733300 | 0.50636300  | 0.09530500  |
| C | -5.04208900 | 0.60520200  | -1.18248100 |
| C | -4.28422100 | -0.45523300 | -1.73911400 |
| C | -4.04836700 | -1.61471900 | -0.95995100 |
| C | -4.57490900 | -1.70150400 | 0.35170200  |
| H | -6.17464300 | 1.30933600  | 0.51385100  |
| H | -5.23609100 | 1.49242700  | -1.77882700 |
| H | -3.61289100 | -2.50329500 | -1.40883600 |
| H | -4.40861400 | -2.59168400 | 0.94875600  |
| H | -4.03975000 | -0.44089900 | -2.79800100 |

**3<sub>tBu</sub> [Pd(P<sup>t</sup>Bu<sub>3</sub>)(PhMe)] *ipso-ortho***

|    |             |             |             |
|----|-------------|-------------|-------------|
| Pd | -1.03373600 | -0.22088100 | 0.26068300  |
| P  | 1.25405200  | 0.02574000  | -0.02271800 |
| C  | 1.67028500  | 1.82192100  | -0.67019800 |
| C  | 2.19791000  | -0.24117600 | 1.66573900  |
| C  | 1.96133600  | -1.25717500 | -1.31300900 |
| C  | -3.11838100 | -0.16461000 | 1.17915000  |
| C  | -3.43381600 | 1.21652600  | 1.16032700  |
| C  | -3.88251500 | 1.82322400  | -0.00738300 |
| C  | -3.98129500 | 1.06805200  | -1.18774100 |
| C  | -3.64709500 | -0.28162000 | -1.18939900 |
| C  | -3.24144500 | -0.94498100 | -0.00043900 |
| H  | -2.94775000 | -0.65672300 | 2.13458100  |
| H  | -3.35490800 | 1.78676300  | 2.08200200  |
| H  | -4.14724100 | 2.87703000  | -0.00957400 |
| C  | 1.45869400  | 2.83356500  | 0.47841100  |
| H  | 1.48823100  | 3.84831700  | 0.05932300  |
| H  | 0.48312300  | 2.70051300  | 0.95742100  |
| H  | 2.23669800  | 2.78158300  | 1.24375800  |
| C  | 3.08206500  | 2.03608600  | -1.25300200 |
| H  | 3.87679800  | 1.80758900  | -0.53773000 |
| H  | 3.19388600  | 3.09177400  | -1.53718500 |
| H  | 3.25700500  | 1.44426900  | -2.15509800 |
| C  | 0.62076000  | 2.19261900  | -1.74668800 |
| H  | 0.76398200  | 3.24505200  | -2.02900400 |
| H  | 0.70451000  | 1.59712000  | -2.65624000 |
| H  | -0.39613100 | 2.07259300  | -1.35896800 |
| C  | 1.38056800  | 0.44760800  | 2.78597300  |
| H  | 1.83750500  | 0.20454600  | 3.75539200  |
| H  | 1.35594200  | 1.53404300  | 2.70036300  |
| H  | 0.34662400  | 0.08679000  | 2.78934300  |
| C  | 3.65123700  | 0.27046900  | 1.72003900  |
| H  | 3.71445500  | 1.35598100  | 1.61072700  |
| H  | 4.29035100  | -0.18464400 | 0.95934300  |
| H  | 4.08181600  | 0.02129200  | 2.69989100  |
| C  | 2.19169500  | -1.74450200 | 2.02015800  |
| H  | 2.54787500  | -1.86136300 | 3.05243200  |
| H  | 1.18144600  | -2.16409000 | 1.96771100  |
| H  | 2.85251700  | -2.33814800 | 1.38470400  |
| C  | 3.49187900  | -1.44915200 | -1.31561300 |
| H  | 3.76454800  | -2.13980800 | -2.12579300 |
| H  | 4.03479800  | -0.51623700 | -1.48657200 |

|   |             |             |             |
|---|-------------|-------------|-------------|
| H | 3.85974600  | -1.89011900 | -0.38562800 |
| C | 1.51805200  | -0.84772300 | -2.73501100 |
| H | 1.74451900  | -1.67447800 | -3.42145600 |
| H | 0.44008900  | -0.66181100 | -2.78323500 |
| H | 2.04398500  | 0.03293300  | -3.11048900 |
| C | 1.28311600  | -2.62278400 | -1.04492600 |
| H | 1.58533600  | -3.32841300 | -1.83141400 |
| H | 1.56088200  | -3.06223900 | -0.08670800 |
| H | 0.19271500  | -2.52545100 | -1.06616000 |
| H | -4.31802500 | 1.53936100  | -2.10750000 |
| H | -3.74820000 | -0.86384800 | -2.10270000 |
| C | -3.22156400 | -2.45984700 | 0.04827400  |
| H | -4.24495100 | -2.85439300 | 0.12038500  |
| H | -2.76966600 | -2.88161600 | -0.85517900 |
| H | -2.66035400 | -2.82874300 | 0.91063500  |

**3<sub>tBu</sub> [Pd(P<sup>t</sup>Bu<sub>3</sub>)(PhMe)] *ipso***

|    |             |             |             |
|----|-------------|-------------|-------------|
| Pd | 1.01645700  | 0.18030100  | -0.39345800 |
| P  | -1.24964200 | -0.01931000 | 0.02538800  |
| C  | -2.20147000 | 1.64967600  | -0.31528600 |
| C  | -2.03302000 | -1.39889000 | -1.11634500 |
| C  | -1.56922300 | -0.52675900 | 1.88516300  |
| C  | -2.27862800 | 1.88663900  | -1.83991000 |
| H  | -2.63617100 | 2.90990100  | -2.01707900 |
| H  | -1.29361200 | 1.79266400  | -2.30933600 |
| H  | -2.97428300 | 1.21282200  | -2.34520400 |
| C  | -3.62249500 | 1.75943200  | 0.27267400  |
| H  | -4.29142700 | 0.97098600  | -0.08108300 |
| H  | -4.06149800 | 2.72028300  | -0.02998000 |
| H  | -3.62301300 | 1.73911600  | 1.36515000  |
| C  | -1.33871200 | 2.81067700  | 0.23637000  |
| H  | -1.80521200 | 3.76381500  | -0.04972400 |
| H  | -1.24660100 | 2.80538600  | 1.32273800  |
| H  | -0.32977200 | 2.77771500  | -0.18758500 |
| C  | -1.42280800 | -1.24771500 | -2.53101900 |
| H  | -1.75551800 | -2.09207700 | -3.15075700 |
| H  | -1.72567900 | -0.33082800 | -3.03758200 |
| H  | -0.32864300 | -1.26056400 | -2.48490800 |
| C  | -3.57095000 | -1.40068500 | -1.23190600 |
| H  | -3.95484400 | -0.49932300 | -1.71644300 |
| H  | -4.06977400 | -1.50515300 | -0.26493800 |
| H  | -3.88204300 | -2.25322400 | -1.85180500 |
| C  | -1.58115300 | -2.78989100 | -0.61806700 |
| H  | -1.86211300 | -3.53804400 | -1.37151600 |
| H  | -0.49506000 | -2.84006800 | -0.48958700 |
| H  | -2.05967300 | -3.08359800 | 0.31890100  |
| C  | -2.97130000 | -1.07748000 | 2.21607400  |
| H  | -3.03216000 | -1.27304100 | 3.29580600  |
| H  | -3.77272700 | -0.37665900 | 1.96789000  |
| H  | -3.18043800 | -2.02355400 | 1.71022800  |
| C  | -1.29737900 | 0.69045200  | 2.79707200  |
| H  | -1.27414400 | 0.34613900  | 3.83973000  |
| H  | -0.32752600 | 1.14888200  | 2.57758400  |
| H  | -2.07228700 | 1.45791600  | 2.73231600  |
| C  | -0.50702900 | -1.58191200 | 2.27869500  |
| H  | -0.59997900 | -1.79034200 | 3.35386400  |
| H  | -0.62203900 | -2.52926400 | 1.75165000  |

|   |            |             |             |
|---|------------|-------------|-------------|
| H | 0.50392200 | -1.21000700 | 2.08278300  |
| C | 3.82604800 | -1.83444500 | 0.03491500  |
| C | 3.39047300 | -1.22299700 | -1.13663200 |
| C | 3.12627000 | 0.16960700  | -1.16782100 |
| C | 3.26552100 | 0.94831000  | 0.01122200  |
| C | 3.67254800 | 0.28762000  | 1.19724900  |
| C | 3.96889000 | -1.07109800 | 1.20437100  |
| H | 4.05093000 | -2.89737900 | 0.04471500  |
| H | 3.29386100 | -1.79874500 | -2.05310700 |
| H | 2.98155100 | 0.66361100  | -2.12722600 |
| H | 3.79416200 | 0.87453300  | 2.10519100  |
| H | 4.30702000 | -1.54381900 | 2.12292300  |
| C | 3.24343900 | 2.46313600  | -0.03726900 |
| H | 4.26803400 | 2.86065600  | -0.06995900 |
| H | 2.71463900 | 2.83074700  | -0.92088500 |
| H | 2.75560500 | 2.88424700  | 0.84820100  |

|   |             |             |             |
|---|-------------|-------------|-------------|
| H | 2.71355400  | -2.81831200 | 0.17597100  |
| C | 3.92830100  | -0.56850700 | -1.22851000 |
| H | 4.45994700  | -0.68281500 | -2.18350000 |
| H | 4.40830300  | 0.25034100  | -0.68648000 |
| H | 4.08970600  | -1.49006300 | -0.66319700 |
| C | 2.32617400  | 0.88779700  | -2.48863300 |
| H | 2.80127000  | 0.60692600  | -3.43811000 |
| H | 1.28159900  | 1.13807100  | -2.70173800 |
| H | 2.83630000  | 1.78415900  | -2.12868700 |
| C | 1.84980800  | -1.51719300 | -2.27889500 |
| H | 2.40801100  | -1.64526300 | -3.21685000 |
| H | 1.92093300  | -2.45379000 | -1.72574100 |
| H | 0.79535900  | -1.35042700 | -2.52269900 |
| C | -4.01128800 | 2.37858800  | 0.01911700  |
| H | -3.06934400 | 2.93288100  | -0.06738100 |
| H | -4.64121300 | 2.67888500  | -0.82882200 |
| H | -4.51030800 | 2.70506700  | 0.93706600  |

**3<sub>tBu</sub>** [Pd(P<sup>*i*</sup>Bu<sub>3</sub>)(PhMe)] *meta-para*

|    |             |             |             |
|----|-------------|-------------|-------------|
| Pd | -0.94332200 | -0.20511400 | -0.50256500 |
| P  | 1.30154900  | 0.02600700  | 0.04079500  |
| C  | 1.68390300  | 1.82641100  | 0.69197600  |
| C  | 1.80702000  | -1.24095300 | 1.43798600  |
| C  | 2.43563100  | -0.30559400 | -1.51373900 |
| C  | -3.39045900 | -1.91864300 | -0.02210900 |
| C  | -4.03397300 | -1.31232600 | 1.04722600  |
| C  | -4.22521300 | 0.08133100  | 1.06517300  |
| C  | -3.77359400 | 0.88681900  | 0.02305700  |
| C  | -3.12530200 | 0.26925200  | -1.08243200 |
| C  | -2.93902200 | -1.13290900 | -1.11119700 |
| H  | -3.25863000 | -2.99685200 | -0.04934300 |
| H  | -4.39956900 | -1.91447500 | 1.87505200  |
| H  | -4.74189900 | 0.53933600  | 1.90569300  |
| H  | -2.93306500 | 0.86010000  | -1.97601500 |
| H  | -2.60912900 | -1.62163400 | -2.02501100 |
| C  | 1.09094400  | 1.99142100  | 2.10890000  |
| H  | 1.12269800  | 3.05556600  | 2.37833200  |
| H  | 0.04495800  | 1.66992200  | 2.14701900  |
| H  | 1.65287100  | 1.45166800  | 2.87468700  |
| C  | 3.16958100  | 2.23809400  | 0.73363900  |
| H  | 3.77695900  | 1.57112400  | 1.35097100  |
| H  | 3.24914600  | 3.24523400  | 1.16619600  |
| H  | 3.62014000  | 2.28390700  | -0.26130000 |
| C  | 0.90958400  | 2.82843800  | -0.19874500 |
| H  | 1.02762200  | 3.83729400  | 0.22077400  |
| H  | 1.26612300  | 2.85880500  | -1.22853300 |
| H  | -0.15777500 | 2.58438600  | -0.22004100 |
| C  | 0.66791700  | -1.27477100 | 2.48600800  |
| H  | 0.87314700  | -2.08253700 | 3.20227700  |
| H  | 0.57726500  | -0.34991400 | 3.05626800  |
| H  | -0.29764200 | -1.47133200 | 2.00858400  |
| C  | 3.14296900  | -0.96995800 | 2.15973000  |
| H  | 3.12596300  | -0.03999300 | 2.73372000  |
| H  | 3.99514800  | -0.93164700 | 1.47624400  |
| H  | 3.33403200  | -1.78242300 | 2.87458600  |
| C  | 1.85688800  | -2.66267900 | 0.83557500  |
| H  | 1.94747600  | -3.38616900 | 1.65671800  |
| H  | 0.94041100  | -2.89860800 | 0.28460000  |

**3<sub>tBu</sub>** [Pd(P<sup>*i*</sup>Bu<sub>3</sub>)(PhMe)] *ortho-meta*

|    |             |             |             |
|----|-------------|-------------|-------------|
| Pd | -0.93447600 | -0.28127000 | -0.51731400 |
| P  | 1.29744800  | 0.02563100  | 0.04022200  |
| C  | 1.61614400  | -0.46177100 | 1.90308700  |
| C  | 2.45522900  | -1.07688600 | -1.07983500 |
| C  | 1.83213700  | 1.89018800  | -0.19365200 |
| C  | -2.95365600 | -1.14336600 | -1.09816000 |
| C  | -3.40381300 | -1.90648900 | 0.00809600  |
| C  | -4.03144300 | -1.27570100 | 1.07287900  |
| C  | -4.20912000 | 0.11984700  | 1.06838100  |
| C  | -3.75457000 | 0.90367000  | 0.01120200  |
| C  | -3.12073200 | 0.26132200  | -1.08754500 |
| H  | -2.64026200 | -1.64984300 | -2.00858700 |
| H  | -3.28453100 | -2.98640300 | -0.00281500 |
| H  | -4.39662800 | -1.86018900 | 1.91344800  |
| H  | -2.92176200 | 0.83700500  | -1.98922900 |
| C  | 1.55443600  | -1.99972500 | 2.03897200  |
| H  | 1.53988500  | -2.25532300 | 3.10694400  |
| H  | 0.64370400  | -2.40770000 | 1.58844900  |
| H  | 2.41949200  | -2.50379700 | 1.60195000  |
| C  | 2.93871800  | 0.02806200  | 2.52740000  |
| H  | 3.81978000  | -0.31917600 | 1.98150800  |
| H  | 3.01611000  | -0.36137200 | 3.55217000  |
| H  | 2.99023300  | 1.11751400  | 2.59792100  |
| C  | 0.43236400  | 0.07532200  | 2.74448300  |
| H  | 0.52485800  | -0.31039100 | 3.76928500  |
| H  | 0.40588400  | 1.16353200  | 2.80767900  |
| H  | -0.52470600 | -0.26082500 | 2.33201100  |
| C  | 1.78334100  | -2.46251400 | -1.24167400 |
| H  | 2.36244000  | -3.05250700 | -1.96577000 |
| H  | 1.73947400  | -3.03470600 | -0.31466400 |
| H  | 0.76095200  | -2.35721800 | -1.62018600 |
| C  | 3.90184500  | -1.27587900 | -0.58312200 |
| H  | 3.94951600  | -1.83019600 | 0.35795000  |
| H  | 4.43725100  | -0.33248200 | -0.44865200 |
| H  | 4.45745900  | -1.86292400 | -1.32765500 |
| C  | 2.50504700  | -0.47560000 | -2.50192300 |
| H  | 2.98399600  | -1.20260300 | -3.17142400 |
| H  | 1.50031100  | -0.27824000 | -2.88995200 |

|   |             |            |             |
|---|-------------|------------|-------------|
| H | 3.09122300  | 0.44459700 | -2.55792700 |
| C | 3.34877100  | 2.16572900 | -0.22195600 |
| H | 3.51410800  | 3.24899400 | -0.30502400 |
| H | 3.85730700  | 1.82762600 | 0.68434700  |
| H | 3.84140200  | 1.70241000 | -1.08037500 |
| C | 1.20011100  | 2.74221500 | 0.92901000  |
| H | 1.33536900  | 3.80336000 | 0.68021200  |
| H | 0.12460800  | 2.55654000 | 1.01902200  |
| H | 1.66659500  | 2.58030600 | 1.90321800  |
| C | 1.20278600  | 2.40805000 | -1.51008500 |
| H | 1.39021900  | 3.48803200 | -1.58848500 |
| H | 1.61741900  | 1.93926200 | -2.40281300 |
| H | 0.12044300  | 2.24166200 | -1.51583600 |
| H | -4.71521600 | 0.59684900 | 1.90480000  |
| C | -3.96905800 | 2.39881600 | -0.01130200 |
| H | -3.01673100 | 2.93701900 | -0.08695700 |
| H | -4.57979100 | 2.70131300 | -0.87228000 |
| H | -4.47746600 | 2.74210700 | 0.89532400  |

**4<sub>Cy</sub><sup>‡</sup> [Pd(PCy<sub>3</sub>)(Ph··Br)]<sup>‡</sup> (conformer F)**

|    |             |             |             |
|----|-------------|-------------|-------------|
| Pd | -1.27078000 | -0.06489300 | -0.00536700 |
| Br | -3.23514800 | 1.71210000  | 0.11567200  |
| P  | 1.08769700  | 0.11283300  | -0.04755300 |
| C  | -3.25611300 | -0.49246400 | 0.05820000  |
| C  | -3.64497100 | -1.06669700 | -1.16849300 |
| C  | -4.24028500 | -2.33056600 | -1.16118900 |
| C  | -4.48480400 | -2.99542400 | 0.04475000  |
| C  | -4.12901500 | -2.39873300 | 1.25825800  |
| C  | -3.53263900 | -1.13524100 | 1.28150000  |
| H  | -3.49380000 | -0.52585100 | -2.09674200 |
| H  | -4.52775000 | -2.78862100 | -2.10433200 |
| H  | -4.96602900 | -3.96933700 | 0.03954500  |
| H  | -4.33000800 | -2.90934000 | 2.19682100  |
| H  | -3.29757200 | -0.64608300 | 2.22087600  |
| C  | 1.72026700  | 4.20182700  | 0.85512500  |
| C  | 1.27012200  | 2.73684000  | 0.98573600  |
| C  | 1.71757100  | 1.88395800  | -0.22297100 |
| C  | 1.21835600  | 2.52797200  | -1.53598700 |
| C  | 1.66784700  | 3.99395300  | -1.66284600 |
| C  | 1.22679300  | 4.83064100  | -0.45459600 |
| H  | 2.81920900  | 4.24966900  | 0.88997700  |
| H  | 1.35549500  | 4.77556600  | 1.71667400  |
| H  | 1.66253900  | 2.31946300  | 1.92056600  |
| H  | 0.17411400  | 2.69633600  | 1.05922100  |
| H  | 2.81720400  | 1.86481700  | -0.24830600 |
| H  | 1.58022900  | 1.96649000  | -2.40544900 |
| H  | 0.12053000  | 2.47722400  | -1.56196100 |
| H  | 2.76418600  | 4.03170700  | -1.75007500 |
| H  | 1.26653900  | 4.42057300  | -2.59106100 |
| H  | 0.12895500  | 4.89036500  | -0.43625600 |
| H  | 1.59658700  | 5.85978700  | -0.54780000 |
| C  | 3.71186500  | -0.54412800 | 3.30532000  |
| C  | 3.34060900  | -0.16670800 | 1.85900500  |
| C  | 1.85512800  | -0.47689300 | 1.57708100  |
| C  | 1.55652800  | -1.96650200 | 1.85286100  |
| C  | 1.92935200  | -2.34811300 | 3.29539100  |
| C  | 3.39633500  | -2.01656000 | 3.60746700  |

|   |            |             |             |
|---|------------|-------------|-------------|
| H | 3.15023400 | 0.09762700  | 4.00029700  |
| H | 4.77559400 | -0.33781200 | 3.48083000  |
| H | 3.98007800 | -0.73076000 | 1.16975400  |
| H | 3.55797800 | 0.89383200  | 1.69117400  |
| H | 1.26191400 | 0.09680300  | 2.30572300  |
| H | 0.49693100 | -2.17965800 | 1.66477900  |
| H | 2.13526200 | -2.59251900 | 1.15962600  |
| H | 1.27633200 | -1.80095500 | 3.99128300  |
| H | 1.73643100 | -3.41601700 | 3.45957200  |
| H | 4.04918000 | -2.65796000 | 2.99655100  |
| H | 3.62506700 | -2.24715200 | 4.65571800  |
| C | 1.72326200 | -2.74935200 | -3.11410400 |
| C | 1.25692900 | -2.17141700 | -1.76650300 |
| C | 1.87552600 | -0.77827500 | -1.51481700 |
| C | 3.41435900 | -0.85567500 | -1.58266900 |
| C | 3.87759400 | -1.42030600 | -2.93819900 |
| C | 3.25555800 | -2.79683500 | -3.21565700 |
| H | 1.32433300 | -2.12712200 | -3.92922200 |
| H | 1.30133100 | -3.75291000 | -3.25371100 |
| H | 1.54793700 | -2.85980800 | -0.96174000 |
| H | 0.16232800 | -2.10417000 | -1.74050000 |
| H | 1.54430700 | -0.14366600 | -2.35086600 |
| H | 3.86628300 | 0.12909000  | -1.41320400 |
| H | 3.78347500 | -1.51426200 | -0.78559100 |
| H | 3.59019200 | -0.72170700 | -3.73789800 |
| H | 4.97319700 | -1.48531000 | -2.95951400 |
| H | 3.64372000 | -3.52113900 | -2.48383400 |
| H | 3.56102300 | -3.15991200 | -4.20525100 |

**4<sub>Cy</sub><sup>‡</sup> [Pd(PCy<sub>3</sub>)(Ph··Br)]<sup>‡</sup> (conformer C)**

|    |             |             |             |
|----|-------------|-------------|-------------|
| Pd | 1.10216900  | 0.16484800  | -0.17507800 |
| Br | 2.34262700  | 1.95927500  | -1.69487700 |
| P  | -1.17161600 | -0.27394100 | 0.34621100  |
| C  | 3.10281800  | 0.25192400  | -0.53048900 |
| C  | 3.79994000  | 0.58399800  | 0.64899300  |
| C  | 4.78254000  | -0.28894700 | 1.11974700  |
| C  | 5.10110100  | -1.45286500 | 0.41096000  |
| C  | 4.43185400  | -1.75243700 | -0.77895700 |
| C  | 3.44493000  | -0.89551100 | -1.27483400 |
| C  | -2.35786200 | 1.18654300  | 0.08500100  |
| C  | -3.67115200 | 1.19394800  | 0.89691600  |
| C  | -4.58218400 | 2.35975100  | 0.46869700  |
| C  | -3.86812100 | 3.71300300  | 0.59354300  |
| C  | -2.54273700 | 3.71364500  | -0.18142100 |
| C  | -1.63478200 | 2.54433000  | 0.23563000  |
| C  | -1.84368300 | -1.62818500 | -0.78856300 |
| C  | -1.55297800 | -1.30237400 | -2.27054700 |
| C  | -1.91883400 | -2.48183600 | -3.18788600 |
| C  | -3.37869400 | -2.91941500 | -2.99876000 |
| C  | -3.67901700 | -3.22871300 | -1.52514500 |
| C  | -3.31859200 | -2.04171800 | -0.61267600 |
| C  | -1.57252400 | -0.91374100 | 2.08402300  |
| C  | -1.09014000 | 0.05351000  | 3.19622200  |
| C  | 0.42415400  | -0.00235700 | 3.45512900  |
| C  | 0.90029100  | -1.43357500 | 3.74175200  |
| C  | 0.48624300  | -2.38643600 | 2.61129200  |
| C  | -1.03075400 | -2.33636700 | 2.36968800  |

|                                                                                            |             |             |             |                                                                            |             |             |             |
|--------------------------------------------------------------------------------------------|-------------|-------------|-------------|----------------------------------------------------------------------------|-------------|-------------|-------------|
| H                                                                                          | 3.57842600  | 1.50923700  | 1.17037600  | C                                                                          | 1.21835600  | 2.52797200  | -1.53598700 |
| H                                                                                          | 5.31182500  | -0.04857700 | 2.03849000  | C                                                                          | 1.66784700  | 3.99395300  | -1.66284600 |
| H                                                                                          | 5.88108000  | -2.11460500 | 0.77678900  | C                                                                          | 1.22679300  | 4.83064100  | -0.45459600 |
| H                                                                                          | 4.68885500  | -2.64816200 | -1.33899400 | H                                                                          | 2.81920900  | 4.24966900  | 0.88997700  |
| H                                                                                          | 2.96129700  | -1.09424000 | -2.22544700 | H                                                                          | 1.35549500  | 4.77556600  | 1.71667400  |
| H                                                                                          | -2.62659500 | 1.08938500  | -0.97836700 | H                                                                          | 1.66253900  | 2.31946300  | 1.92056600  |
| H                                                                                          | -3.44211600 | 1.30384900  | 1.96523100  | H                                                                          | 0.17411400  | 2.69633600  | 1.05922100  |
| H                                                                                          | -4.21148700 | 0.24754700  | 0.78859000  | H                                                                          | 2.81720400  | 1.86481700  | -0.24830600 |
| H                                                                                          | -4.89585900 | 2.20821100  | -0.57494300 | H                                                                          | 1.58022900  | 1.96649000  | -2.40544900 |
| H                                                                                          | -5.49848800 | 2.35329500  | 1.07339500  | H                                                                          | 0.12053000  | 2.47722400  | -1.56196100 |
| H                                                                                          | -3.66718400 | 3.91762000  | 1.65587000  | H                                                                          | 2.76418600  | 4.03170700  | -1.75007500 |
| H                                                                                          | -4.52010200 | 4.52130600  | 0.23840400  | H                                                                          | 1.26653900  | 4.42057300  | -2.59106100 |
| H                                                                                          | -2.75262900 | 3.63765900  | -1.25889800 | H                                                                          | 0.12895500  | 4.89036500  | -0.43625600 |
| H                                                                                          | -2.01375900 | 4.66382300  | -0.03422700 | H                                                                          | 1.59658700  | 5.85978700  | -0.54780000 |
| H                                                                                          | -1.32694500 | 2.68346100  | 1.28253300  | C                                                                          | 3.71186500  | -0.54412800 | 3.30532000  |
| H                                                                                          | -0.71458400 | 2.54606300  | -0.35872900 | C                                                                          | 3.34060900  | -0.16670800 | 1.85900500  |
| H                                                                                          | -1.21755200 | -2.49536000 | -0.52993800 | C                                                                          | 1.85512800  | -0.47689300 | 1.57708100  |
| H                                                                                          | -0.49588300 | -1.03738800 | -2.39320800 | C                                                                          | 1.55652800  | -1.96650200 | 1.85286100  |
| H                                                                                          | -2.13354300 | -0.41964000 | -2.57696000 | C                                                                          | 1.92935200  | -2.34811300 | 3.29539100  |
| H                                                                                          | -1.73488900 | -2.20784700 | -4.23453800 | C                                                                          | 3.39633500  | -2.01656000 | 3.60746700  |
| H                                                                                          | -1.25391900 | -3.32964400 | -2.96485300 | H                                                                          | 3.15023400  | 0.09762700  | 4.00029700  |
| H                                                                                          | -3.59980500 | -3.79371400 | -3.62410800 | H                                                                          | 4.77559400  | -0.33781200 | 3.48083000  |
| H                                                                                          | -4.04483900 | -2.11334600 | -3.34114700 | H                                                                          | 3.98007800  | -0.73076000 | 1.16975400  |
| H                                                                                          | -4.73820100 | -3.48675900 | -1.39659300 | H                                                                          | 3.55797800  | 0.89383200  | 1.69117400  |
| H                                                                                          | -3.10223400 | -4.11201900 | -1.21312700 | H                                                                          | 1.26191400  | 0.09680300  | 2.30572300  |
| H                                                                                          | -3.53175300 | -2.30151100 | 0.43123500  | H                                                                          | 0.49693100  | -2.17965800 | 1.66477900  |
| H                                                                                          | -3.96874400 | -1.19389400 | -0.86763300 | H                                                                          | 2.13526200  | -2.59251900 | 1.15962600  |
| H                                                                                          | -2.66653000 | -0.96340200 | 2.13796600  | H                                                                          | 1.27633200  | -1.80095500 | 3.99128300  |
| H                                                                                          | -1.61520600 | -0.22793700 | 4.12198700  | H                                                                          | 1.73643100  | -3.41601700 | 3.45957200  |
| H                                                                                          | -1.39290200 | 1.08402900  | 2.97721800  | H                                                                          | 4.04918000  | -2.65796000 | 2.99655100  |
| H                                                                                          | 0.95981600  | 0.38320000  | 2.57573500  | H                                                                          | 3.62506700  | -2.24715200 | 4.65571800  |
| H                                                                                          | 0.67324800  | 0.66011200  | 4.29443700  | C                                                                          | 1.72326200  | -2.74935200 | -3.11410400 |
| H                                                                                          | 0.46260400  | -1.78263200 | 4.68981700  | C                                                                          | 1.25692900  | -2.17141700 | -1.76650300 |
| H                                                                                          | 1.98945100  | -1.45086300 | 3.87254100  | C                                                                          | 1.87552600  | -0.77827500 | -1.51481700 |
| H                                                                                          | 1.01899300  | -2.10599300 | 1.69171000  | C                                                                          | 3.41435900  | -0.85567500 | -1.58266900 |
| H                                                                                          | 0.78425900  | -3.41577000 | 2.84934700  | C                                                                          | 3.87759400  | -1.42030600 | -2.93819900 |
| H                                                                                          | -1.53893800 | -2.69672300 | 3.27753900  | C                                                                          | 3.25555800  | -2.79683500 | -3.21565700 |
| H                                                                                          | -1.31353200 | -3.03436100 | 1.57374500  | H                                                                          | 1.32433300  | -2.12712200 | -3.92922200 |
| <b>4<sub>Cy</sub><sup>‡</sup> [Pd(PCy<sub>3</sub>)(Ph···Cl)]<sup>‡</sup> (conformer F)</b> |             |             |             | H                                                                          | 1.30133100  | -3.75291000 | -3.25371100 |
| Pd                                                                                         | -1.27078000 | -0.06489300 | -0.00536700 | H                                                                          | 1.54793700  | -2.85980800 | -0.96174000 |
| P                                                                                          | 1.08769700  | 0.11283300  | -0.04755300 | H                                                                          | 0.16232800  | -2.10417000 | -1.74050000 |
| Cl                                                                                         | -3.23514800 | 1.71210000  | 0.11567200  | H                                                                          | 1.54430700  | -0.14366600 | -2.35086600 |
| C                                                                                          | -3.25611300 | -0.49246400 | 0.05820000  | H                                                                          | 3.86628300  | 0.12909000  | -1.41320400 |
| C                                                                                          | -3.64497100 | -1.06669700 | -1.16849300 | H                                                                          | 3.78347500  | -1.51426200 | -0.78559100 |
| C                                                                                          | -4.24028500 | -2.33056600 | -1.16118900 | H                                                                          | 3.59019200  | -0.72170700 | -3.73789800 |
| C                                                                                          | -4.48480400 | -2.99542400 | 0.04475000  | H                                                                          | 4.97319700  | -1.48531000 | -2.95951400 |
| C                                                                                          | -4.12901500 | -2.39873300 | 1.25825800  | H                                                                          | 3.64372000  | -3.52113900 | -2.48383400 |
| C                                                                                          | -3.53263900 | -1.13524100 | 1.28150000  | H                                                                          | 3.56102300  | -3.15991200 | -4.20525100 |
| H                                                                                          | -3.49380000 | -0.52585100 | -2.09674200 | H                                                                          | 1.47349500  | -0.01407900 | 3.09219100  |
| H                                                                                          | -4.52775000 | -2.78862100 | -2.10433200 | <b>4<sub>H</sub><sup>‡</sup> [Pd(PH<sub>3</sub>)(Ph···Br)]<sup>‡</sup></b> |             |             |             |
| H                                                                                          | -4.96602900 | -3.96933700 | 0.03954500  | Pd                                                                         | 0.85320600  | -0.40434000 | -0.00001200 |
| H                                                                                          | -4.33000800 | -2.90934000 | 2.19682100  | Br                                                                         | 0.01223600  | 2.04490300  | 0.00000500  |
| H                                                                                          | -3.29757200 | -0.64608300 | 2.22087600  | P                                                                          | 3.01256900  | -1.28437500 | 0.00001100  |
| C                                                                                          | 1.72026700  | 4.20182700  | 0.85512500  | C                                                                          | -3.44874400 | -1.44799100 | 0.00000400  |
| C                                                                                          | 1.27012200  | 2.73684000  | 0.98573600  | C                                                                          | -2.86912700 | -1.06033600 | 1.21178500  |
| C                                                                                          | 1.71757100  | 1.88395800  | -0.22297100 | C                                                                          | -1.70936900 | -0.28091700 | 1.22696100  |

|   |             |             |             |
|---|-------------|-------------|-------------|
| C | -1.11540200 | 0.06437600  | 0.00000400  |
| C | -1.70937500 | -0.28090800 | -1.22695300 |
| C | -2.86913200 | -1.06032900 | -1.21177700 |
| H | -4.36110300 | -2.03752700 | 0.00000400  |
| H | -3.32763600 | -1.34988500 | 2.15380600  |
| H | -1.27892200 | 0.06174000  | 2.16186900  |
| H | -1.27893200 | 0.06175600  | -2.16186100 |
| H | -3.32764500 | -1.34987100 | -2.15379900 |
| H | 4.15167400  | -0.44227400 | 0.00020900  |
| H | 3.44253500  | -2.12695500 | 1.05532500  |
| H | 3.44269000  | -2.12667300 | -1.05546400 |

**4<sub>H</sub><sup>‡</sup> [Pd(PH<sub>3</sub>)(Ph···Cl)]<sup>‡</sup>**

|    |             |             |             |
|----|-------------|-------------|-------------|
| Pd | -0.86122700 | -0.09081700 | 0.00001100  |
| P  | -3.05151300 | -0.93110400 | 0.00000700  |
| Cl | -0.01615700 | 2.21774800  | -0.00003900 |
| C  | 3.50663900  | -1.07157600 | -0.00000200 |
| C  | 2.90916500  | -0.71288200 | -1.21213100 |
| C  | 1.71099800  | 0.00641500  | -1.22741200 |
| C  | 1.10218700  | 0.30810500  | 0.00000300  |
| C  | 1.71104600  | 0.00649100  | 1.22741200  |
| C  | 2.90921100  | -0.71280800 | 1.21212900  |
| H  | 4.44781900  | -1.61387200 | -0.00000300 |
| H  | 3.38290100  | -0.97743300 | -2.15395600 |
| H  | 1.26111500  | 0.33056100  | -2.15984200 |
| H  | 1.26119400  | 0.33068800  | 2.15983900  |
| H  | 3.38298200  | -0.97730300 | 2.15395200  |
| H  | -4.17175500 | -0.06456700 | -0.00058100 |
| H  | -3.49778600 | -1.76454400 | -1.05546300 |
| H  | -3.49813800 | -1.76356200 | 1.05610300  |

**4<sub>Ph</sub><sup>‡</sup> [Pd(PPh<sub>3</sub>)(Ph···Br)]<sup>‡</sup>**

|    |             |             |             |
|----|-------------|-------------|-------------|
| Pd | -1.19751900 | -0.03636800 | 0.01067500  |
| Br | -2.85076900 | -2.08632300 | -0.01745200 |
| P  | 1.14939100  | 0.10205400  | 0.00284200  |
| C  | -4.84985600 | 2.36817900  | 0.01779700  |
| C  | -4.44204200 | 1.80950100  | -1.19742900 |
| C  | -3.64415800 | 0.66271000  | -1.22034200 |
| C  | -3.22250000 | 0.10684600  | 0.00315300  |
| C  | -3.65876700 | 0.63648500  | 1.23311600  |
| C  | -4.45624000 | 1.78359100  | 1.22555900  |
| H  | -5.48639200 | 3.24842700  | 0.02355900  |
| H  | -4.75864200 | 2.25605300  | -2.13669700 |
| H  | -3.36296300 | 0.19651600  | -2.15872000 |
| H  | -3.38859300 | 0.15008800  | 2.16445500  |
| H  | -4.78285900 | 2.21074000  | 2.17036300  |
| C  | 3.13503500  | -2.79950200 | -3.05053900 |
| C  | 3.71704600  | -1.55022000 | -2.82892400 |
| C  | 3.14329600  | -0.65822500 | -1.91961300 |
| C  | 1.97604100  | -1.00709000 | -1.22344600 |
| C  | 1.39080500  | -2.26173800 | -1.46253600 |
| C  | 1.97108700  | -3.15396200 | -2.36435100 |
| H  | 3.58199400  | -3.49077200 | -3.76011400 |
| H  | 4.61862800  | -1.26549600 | -3.36515100 |
| H  | 3.60316900  | 0.31239100  | -1.75972500 |
| H  | 0.47213200  | -2.53201700 | -0.94767200 |
| H  | 1.50663100  | -4.12081500 | -2.53871000 |

|   |            |             |             |
|---|------------|-------------|-------------|
| C | 2.77107800 | 4.33430900  | -1.07596100 |
| C | 3.47314000 | 3.55590100  | -0.15422300 |
| C | 3.01045700 | 2.28325000  | 0.18916400  |
| C | 1.83524500 | 1.77513200  | -0.38485200 |
| C | 1.13002400 | 2.57219000  | -1.30171800 |
| C | 1.59802400 | 3.83907500  | -1.65047400 |
| H | 3.13166000 | 5.32498700  | -1.33969800 |
| H | 4.38242500 | 3.93838700  | 0.30216100  |
| H | 3.56291900 | 1.68979500  | 0.91137700  |
| H | 0.20559000 | 2.19749400  | -1.73548600 |
| H | 1.04079600 | 4.44300300  | -2.36166800 |
| C | 3.07297300 | -0.94940100 | 4.11127400  |
| C | 3.75233600 | -1.28582700 | 2.93912000  |
| C | 3.19776600 | -0.98341800 | 1.69325900  |
| C | 1.95331200 | -0.34109500 | 1.60665300  |
| C | 1.27311500 | -0.01749700 | 2.79185800  |
| C | 1.83175700 | -0.31317700 | 4.03541200  |
| H | 3.50464100 | -1.18907800 | 5.07937700  |
| H | 4.71476100 | -1.78812800 | 2.99172400  |
| H | 3.73215300 | -1.25618200 | 0.78815800  |
| H | 0.29737200 | 0.45934000  | 2.73417200  |
| H | 1.29265500 | -0.05741600 | 4.94369700  |

**4<sub>Ph</sub><sup>‡</sup> [Pd(PPh<sub>3</sub>)(Ph···Cl)]<sup>‡</sup>**

|    |             |             |             |
|----|-------------|-------------|-------------|
| Pd | -1.37173500 | 0.38760400  | 0.00171300  |
| P  | 0.95453600  | -0.04231500 | 0.00399400  |
| Cl | -2.69055600 | 2.49090300  | -0.14731600 |
| C  | -5.42489700 | -1.43775200 | 0.11506600  |
| C  | -4.92265600 | -0.87556300 | 1.29277800  |
| C  | -3.91091600 | 0.08708600  | 1.24494500  |
| C  | -3.37686100 | 0.43434800  | -0.00692400 |
| C  | -3.90436300 | -0.07946100 | -1.20325000 |
| C  | -4.91632000 | -1.03975100 | -1.12538900 |
| H  | -6.22487400 | -2.17109700 | 0.16280700  |
| H  | -5.32868000 | -1.17357400 | 2.25616000  |
| H  | -3.54489200 | 0.56378800  | 2.14823200  |
| H  | -3.53315700 | 0.27024900  | -2.16092000 |
| H  | -5.31837500 | -1.46469200 | -2.04171200 |
| C  | 3.60747500  | 3.74260800  | -0.53616400 |
| C  | 4.12725000  | 2.64344000  | 0.15124700  |
| C  | 3.35042300  | 1.49759000  | 0.33176100  |
| C  | 2.04263400  | 1.43951300  | -0.17546300 |
| C  | 1.52381500  | 2.55453800  | -0.85208100 |
| C  | 2.30493200  | 3.69635600  | -1.03689700 |
| H  | 4.21248200  | 4.63513900  | -0.67207100 |
| H  | 5.13704100  | 2.67813600  | 0.55186200  |
| H  | 3.76020500  | 0.65176400  | 0.87616600  |
| H  | 0.50033300  | 2.53060800  | -1.21769500 |
| H  | 1.88971500  | 4.55327000  | -1.56036800 |
| C  | 2.47032900  | -2.01514300 | 3.94105600  |
| C  | 2.99230800  | -2.45040600 | 2.72215200  |
| C  | 2.55703900  | -1.87640300 | 1.52485200  |
| C  | 1.58946400  | -0.86099100 | 1.53481200  |
| C  | 1.06226500  | -0.43770800 | 2.76659900  |
| C  | 1.50463300  | -1.00552500 | 3.96099200  |
| H  | 2.80898800  | -2.46426200 | 4.87087800  |
| H  | 3.73933700  | -3.23958600 | 2.69942700  |

|   |             |             |             |
|---|-------------|-------------|-------------|
| H | 2.96783900  | -2.22540000 | 0.58231100  |
| H | 0.29918700  | 0.33697100  | 2.78510500  |
| H | 1.08833000  | -0.66651100 | 4.90586800  |
| C | 2.18503200  | -2.96613000 | -3.40737800 |
| C | 3.05238700  | -1.92903000 | -3.06071500 |
| C | 2.71174200  | -1.03718000 | -2.04065500 |
| C | 1.49450200  | -1.17170900 | -1.35667400 |
| C | 0.62350400  | -2.21205200 | -1.72191300 |
| C | 0.96897800  | -3.10700400 | -2.73429800 |
| H | 2.45131000  | -3.65691000 | -4.20292400 |
| H | 3.99649700  | -1.80940000 | -3.58573000 |
| H | 3.39265600  | -0.23143500 | -1.78464300 |
| H | -0.33298700 | -2.31306700 | -1.21363300 |
| H | 0.28409700  | -3.90641800 | -3.00422100 |

**4<sub>SP</sub><sup>‡</sup> [Pd(SPhos)(Ph··Br)]<sup>‡</sup> (conformer a) *trans* phenyl**

|    |             |             |             |
|----|-------------|-------------|-------------|
| Pd | 1.06894100  | 0.46210800  | 0.32334600  |
| Br | 2.45156400  | -0.18778700 | 2.52642300  |
| P  | -1.23863900 | 0.52801000  | -0.22017300 |
| C  | -0.24007500 | -2.52235500 | -0.92979400 |
| C  | 0.96294200  | -2.56786000 | -1.66154400 |
| C  | 2.09826300  | -3.20932000 | -1.14685000 |
| C  | 2.02705500  | -3.80357500 | 0.11182800  |
| C  | 0.85515600  | -3.77341200 | 0.86353100  |
| C  | -0.27600600 | -3.13736000 | 0.33491800  |
| C  | -1.48412900 | -1.99372400 | -1.57812100 |
| C  | -2.01003400 | -0.69315800 | -1.39984700 |
| C  | -3.17357300 | -0.34600700 | -2.11269600 |
| C  | -3.81380800 | -1.23965600 | -2.96854400 |
| C  | -3.29709100 | -2.52341000 | -3.13156500 |
| C  | -2.14440600 | -2.88474700 | -2.44122100 |
| H  | 3.02002300  | -3.25312400 | -1.71427300 |
| H  | 0.83082800  | -4.23831800 | 1.84096000  |
| H  | -3.59328700 | 0.64815300  | -2.00748800 |
| H  | -4.70943500 | -0.93099100 | -3.50145100 |
| H  | -3.78248800 | -3.23609100 | -3.79310800 |
| H  | -1.72890000 | -3.88039100 | -2.56934500 |
| C  | 3.03913300  | 0.81261100  | 0.66107300  |
| C  | 3.20506400  | 2.21047200  | 0.75505300  |
| C  | 3.82910700  | 0.04994200  | -0.22349700 |
| C  | 4.10770600  | 2.84407700  | -0.10359000 |
| H  | 2.65548000  | 2.77494500  | 1.50080100  |
| C  | 4.72360100  | 0.70977700  | -1.06871800 |
| C  | 4.86737500  | 2.10050600  | -1.01131100 |
| H  | 5.32510200  | 0.12979300  | -1.76504200 |
| C  | -1.59435500 | -3.69887700 | 2.25380500  |
| H  | -0.91570800 | -3.24485700 | 2.98689300  |
| H  | -2.62714000 | -3.54079500 | 2.57007500  |
| H  | -1.39540200 | -4.77677100 | 2.19334700  |
| C  | 2.10734400  | -1.93281600 | -3.66563500 |
| H  | 2.91088200  | -1.39046000 | -3.15167300 |
| H  | 2.45145300  | -2.94477000 | -3.91836900 |
| H  | 1.84413600  | -1.40312800 | -4.58286000 |
| H  | 2.90441700  | -4.30045600 | 0.51685600  |
| O  | -1.48030400 | -3.07819100 | 0.98216500  |
| O  | 0.92319200  | -1.96343800 | -2.88527300 |
| C  | -1.65431500 | 2.19370500  | -1.00213000 |

|   |             |             |             |
|---|-------------|-------------|-------------|
| C | -1.22300600 | 3.36566400  | -0.09334600 |
| C | -0.97984300 | 2.32047500  | -2.38638300 |
| H | -2.74195400 | 2.26473800  | -1.13654200 |
| C | -1.51112200 | 4.72813600  | -0.74824600 |
| H | -0.14695000 | 3.27850700  | 0.11431300  |
| H | -1.73346100 | 3.31267800  | 0.87498100  |
| C | -1.26638100 | 3.68354000  | -3.03861700 |
| H | 0.10556300  | 2.19525300  | -2.26246900 |
| H | -1.31161700 | 1.51324300  | -3.04858700 |
| C | -0.85030700 | 4.84731900  | -2.12837800 |
| H | -1.16517900 | 5.53366100  | -0.08751500 |
| H | -2.59878300 | 4.85769500  | -0.85430000 |
| H | -0.74584600 | 3.74669200  | -4.00292900 |
| H | -2.34172700 | 3.76208700  | -3.25910400 |
| H | -1.10734000 | 5.80795300  | -2.59301300 |
| H | 0.24301600  | 4.83848100  | -2.00755400 |
| C | -2.39133000 | 0.32390800  | 1.27632100  |
| C | -1.75106500 | 0.81857200  | 2.59103600  |
| C | -3.81964000 | 0.88171800  | 1.12191200  |
| H | -2.46207600 | -0.77108700 | 1.34158000  |
| C | -2.62623700 | 0.45978300  | 3.80461200  |
| H | -1.62107500 | 1.90926600  | 2.55948200  |
| H | -0.74866600 | 0.39147000  | 2.70472700  |
| C | -4.69157600 | 0.52585900  | 2.34102000  |
| H | -3.78280400 | 1.97587400  | 1.02301700  |
| H | -4.29025000 | 0.49277600  | 0.21224100  |
| C | -4.05480500 | 1.00157500  | 3.65469200  |
| H | -2.16431200 | 0.84628800  | 4.72222600  |
| H | -2.66379700 | -0.63499600 | 3.91102500  |
| H | -5.69252600 | 0.96076500  | 2.22052600  |
| H | -4.82734800 | -0.56520700 | 2.37737300  |
| H | -4.67269300 | 0.69727300  | 4.50947900  |
| H | -4.02676200 | 2.10156400  | 3.66524900  |
| H | 3.73676100  | -1.03030000 | -0.23529100 |
| H | 4.23015800  | 3.92285500  | -0.04497500 |
| H | 5.58228900  | 2.59999400  | -1.65914400 |

**4<sub>SP</sub><sup>‡</sup> [Pd(SPhos)(Ph··Br)]<sup>‡</sup> (conformer c) *trans* phenyl**

|    |             |             |             |
|----|-------------|-------------|-------------|
| Pd | 1.06885000  | 0.46229000  | 0.32319900  |
| Br | 2.45162200  | -0.18661000 | 2.52650300  |
| P  | -1.23873800 | 0.52772300  | -0.22026800 |
| C  | -0.23967500 | -2.52260700 | -0.92934500 |
| C  | 0.96323900  | -2.56817100 | -1.66126200 |
| C  | 2.09872300  | -3.20932700 | -1.14654800 |
| C  | 2.02778800  | -3.80320600 | 0.11232400  |
| C  | 0.85600200  | -3.77296300 | 0.86420000  |
| C  | -0.27532800 | -3.13723200 | 0.33556000  |
| C  | -1.48389800 | -1.99434800 | -1.57765300 |
| C  | -2.01000800 | -0.69382700 | -1.39963800 |
| C  | -3.17366800 | -0.34704400 | -2.11246700 |
| C  | -3.81383800 | -1.24100800 | -2.96803400 |
| C  | -3.29693100 | -2.52472100 | -3.13078000 |
| C  | -2.14411800 | -2.88569700 | -2.44046000 |
| H  | 3.02039600  | -3.25320200 | -1.71410900 |
| H  | 0.83188700  | -4.23756700 | 1.84177800  |
| H  | -3.59353800 | 0.64707200  | -2.00746200 |
| H  | -4.70956400 | -0.93262100 | -3.50093400 |



|   |             |             |             |
|---|-------------|-------------|-------------|
| H | -3.78227600 | -3.23764700 | -3.79209800 |
| H | -1.72845800 | -3.88130100 | -2.56838400 |
| C | 3.03899500  | 0.81320100  | 0.66086600  |
| C | 3.20481400  | 2.21110600  | 0.75443800  |
| C | 3.82897500  | 0.05035000  | -0.22354500 |
| C | 4.10736900  | 2.84453500  | -0.10442100 |
| H | 2.65520400  | 2.77574700  | 1.50004000  |
| C | 4.72336300  | 0.71002000  | -1.06901100 |
| C | 4.86704300  | 2.10077300  | -1.01198500 |
| H | 5.32485900  | 0.12988900  | -1.76521700 |
| C | -1.59331800 | -3.69836300 | 2.25480600  |
| H | -0.91460900 | -3.24406800 | 2.98766600  |
| H | -2.62607100 | -3.54030500 | 2.57119300  |
| H | -1.39425700 | -4.77625200 | 2.19461700  |
| C | 2.10734900  | -1.93327800 | -3.66556200 |
| H | 2.91076000  | -1.39070800 | -3.15163000 |
| H | 2.45169800  | -2.94516000 | -3.91826200 |
| H | 1.84400100  | -1.40369300 | -4.58280700 |
| H | 2.90527600  | -4.29985200 | 0.51736600  |
| O | -1.47953100 | -3.07801700 | 0.98297700  |
| O | 0.92321600  | -1.96415200 | -2.88518200 |
| C | -1.65473500 | 2.19316900  | -1.00255700 |
| C | -1.22356900 | 3.36539600  | -0.09405500 |
| C | -0.98038600 | 2.31978500  | -2.38688200 |
| H | -2.74239400 | 2.26397900  | -1.13691000 |
| C | -1.51207300 | 4.72766800  | -0.74919400 |
| H | -0.14746600 | 3.27851400  | 0.11347600  |
| H | -1.73388500 | 3.31248500  | 0.87435100  |
| C | -1.26729800 | 3.68264300  | -3.03938400 |
| H | 0.10505900  | 2.19484700  | -2.26301300 |
| H | -1.31201500 | 1.51233000  | -3.04888600 |
| C | -0.85144200 | 4.84672500  | -2.12942800 |
| H | -1.16623800 | 5.53340900  | -0.08866900 |
| H | -2.59977600 | 4.85695700  | -0.85514800 |
| H | -0.74684400 | 3.74571800  | -4.00374300 |
| H | -2.34267700 | 3.76088200  | -3.25981500 |
| H | -1.10878500 | 5.80718900  | -2.59424000 |
| H | 0.24189700  | 4.83821000  | -2.00872200 |
| C | -2.39130900 | 0.32378400  | 1.27635500  |
| C | -1.75090200 | 0.81868500  | 2.59091100  |
| C | -3.81966200 | 0.88151300  | 1.12199100  |
| H | -2.46200800 | -0.77120100 | 1.34179300  |
| C | -2.62593700 | 0.46011800  | 3.80464400  |
| H | -1.62090200 | 1.90937200  | 2.55914600  |
| H | -0.74848800 | 0.39160600  | 2.70456300  |
| C | -4.69145800 | 0.52598600  | 2.34129900  |
| H | -3.78289000 | 1.97564000  | 1.02275500  |
| H | -4.29037200 | 0.49227800  | 0.21249700  |
| C | -4.05449900 | 1.00193700  | 3.65479500  |
| H | -2.16389500 | 0.84675000  | 4.72214500  |
| H | -2.66352600 | -0.63464300 | 3.91123100  |
| H | -5.69238100 | 0.96096300  | 2.22083100  |
| H | -4.82733400 | -0.56505900 | 2.37790400  |
| H | -4.67229500 | 0.69782900  | 4.50971900  |
| H | -4.02641200 | 2.10192700  | 3.66513000  |
| H | 3.73673000  | -1.02990500 | -0.23502100 |
| H | 4.22974300  | 3.92333800  | -0.04611300 |

|                                                                                                      |             |             |             |
|------------------------------------------------------------------------------------------------------|-------------|-------------|-------------|
| H                                                                                                    | 5.58188500  | 2.60013800  | -1.65999300 |
| <b>4<sub>sp</sub><sup>†</sup> [Pd(SPhos)(Ph···Br)]<sup>†</sup> (conformer c) <i>trans</i> halide</b> |             |             |             |
| Pd                                                                                                   | 2.25810600  | -0.17022800 | -0.01091800 |
| Br                                                                                                   | 4.26882600  | 0.65198100  | -1.56547800 |
| P                                                                                                    | -0.09632700 | 0.19132400  | -0.09429400 |
| O                                                                                                    | -3.48451100 | 1.90056500  | 1.42159500  |
| O                                                                                                    | -3.58292000 | -2.68107100 | 0.42178300  |
| C                                                                                                    | -0.96613500 | -0.47694500 | 1.43125800  |
| C                                                                                                    | -2.34350700 | -0.62194800 | 1.74431200  |
| C                                                                                                    | -3.50638100 | -0.37103000 | 0.83135300  |
| C                                                                                                    | -4.09814700 | 0.90082800  | 0.72047800  |
| C                                                                                                    | -5.25304500 | 1.10055600  | -0.05021700 |
| H                                                                                                    | -5.69310700 | 2.08491700  | -0.15091300 |
| C                                                                                                    | -5.84412000 | 0.00921900  | -0.68091800 |
| H                                                                                                    | -6.73878600 | 0.15987500  | -1.27891800 |
| C                                                                                                    | -5.31776000 | -1.27437700 | -0.55075200 |
| H                                                                                                    | -5.80565300 | -2.11024400 | -1.03673900 |
| C                                                                                                    | -4.15869400 | -1.45948700 | 0.21509700  |
| C                                                                                                    | -2.70653500 | -1.08473500 | 3.02111200  |
| H                                                                                                    | -3.76457400 | -1.19354900 | 3.24293300  |
| C                                                                                                    | -1.76557600 | -1.40866900 | 3.99400500  |
| H                                                                                                    | -2.09002300 | -1.76100300 | 4.96972600  |
| C                                                                                                    | -0.41302600 | -1.28303700 | 3.69312600  |
| H                                                                                                    | 0.34795800  | -1.53800700 | 4.42580900  |
| C                                                                                                    | -0.03516500 | -0.82874800 | 2.43158600  |
| H                                                                                                    | 1.02454300  | -0.74046400 | 2.20182100  |
| C                                                                                                    | -4.23567000 | -3.83634300 | -0.08253200 |
| H                                                                                                    | -5.25240900 | -3.93037100 | 0.32014100  |
| H                                                                                                    | -3.63376200 | -4.68397700 | 0.24936500  |
| H                                                                                                    | -4.27971400 | -3.83176300 | -1.17933600 |
| C                                                                                                    | -4.13857800 | 3.15742000  | 1.51654600  |
| H                                                                                                    | -4.19148200 | 3.66357200  | 0.54383600  |
| H                                                                                                    | -3.53351800 | 3.75624600  | 2.19880000  |
| H                                                                                                    | -5.15198300 | 3.05015800  | 1.92387400  |
| C                                                                                                    | -0.52917100 | 2.02197900  | -0.17105700 |
| H                                                                                                    | -1.61253300 | 2.12163300  | -0.30851200 |
| C                                                                                                    | 0.20144400  | 2.68381800  | -1.36126200 |
| H                                                                                                    | 1.28021400  | 2.49965500  | -1.26176500 |
| H                                                                                                    | -0.10389700 | 2.22791400  | -2.31039400 |
| C                                                                                                    | -0.05096400 | 4.20055300  | -1.41640100 |
| H                                                                                                    | 0.50431900  | 4.63395200  | -2.25811600 |
| H                                                                                                    | -1.11729400 | 4.38777600  | -1.61526400 |
| C                                                                                                    | 0.34760300  | 4.88527900  | -0.10248900 |
| H                                                                                                    | 1.43459400  | 4.79292000  | 0.03787200  |
| H                                                                                                    | 0.12723400  | 5.95981400  | -0.14795000 |
| C                                                                                                    | -0.37457700 | 4.24064000  | 1.08816100  |
| H                                                                                                    | -1.45304000 | 4.43896900  | 1.00159000  |
| H                                                                                                    | -0.04748700 | 4.70053900  | 2.03000700  |
| C                                                                                                    | -0.14036700 | 2.72127800  | 1.14907600  |
| H                                                                                                    | -0.70626500 | 2.29150300  | 1.98201500  |
| H                                                                                                    | 0.92412700  | 2.53064500  | 1.35128600  |
| C                                                                                                    | -0.74901100 | -0.54757100 | -1.70527400 |
| H                                                                                                    | 0.07087100  | -0.26108500 | -2.38199100 |
| C                                                                                                    | -0.74665400 | -2.08955900 | -1.63748400 |
| H                                                                                                    | 0.21347500  | -2.44249700 | -1.23887100 |
| H                                                                                                    | -1.52297700 | -2.42510100 | -0.93916700 |

|   |             |             |             |
|---|-------------|-------------|-------------|
| C | -0.99359800 | -2.70659000 | -3.02505700 |
| H | -0.13909500 | -2.47650800 | -3.67863800 |
| H | -1.03669400 | -3.80074100 | -2.94305500 |
| C | -2.27929500 | -2.16785800 | -3.67033700 |
| H | -3.14890100 | -2.50228500 | -3.08441400 |
| H | -2.40314900 | -2.58434300 | -4.67855000 |
| C | -2.27442100 | -0.63299300 | -3.72419200 |
| H | -1.47640300 | -0.29796800 | -4.40375400 |
| H | -3.21858900 | -0.26338600 | -4.14509800 |
| C | -2.05246400 | -0.01512800 | -2.33106400 |
| H | -2.90599100 | -0.25499200 | -1.69308300 |
| H | -2.02360800 | 1.07691500  | -2.41908700 |
| C | 5.37154800  | -2.22300400 | 2.18975400  |
| C | 5.24277100  | -0.84521400 | 2.39356100  |
| C | 4.69222800  | -0.02786400 | 1.40353400  |
| C | 4.22871400  | -0.62083400 | 0.21072700  |
| C | 4.38729500  | -2.00327000 | -0.01937200 |
| C | 4.94131000  | -2.79602300 | 0.98883000  |
| H | 5.81992100  | -2.84597900 | 2.95855300  |
| H | 5.58695200  | -0.39691000 | 3.32238600  |
| H | 4.63290400  | 1.04717800  | 1.53666200  |
| H | 4.09611400  | -2.43439200 | -0.97137100 |
| H | 5.04999000  | -3.86532100 | 0.82501400  |

**4<sub>sp</sub><sup>+</sup> [Pd(SPhos)(Ph···Cl)]<sup>+</sup> (conformer c) *trans* phenyl**

|    |             |             |             |
|----|-------------|-------------|-------------|
| Pd | 0.95469600  | -1.02750100 | -0.35122300 |
| P  | -1.22270900 | -0.21862800 | 0.21299400  |
| Cl | 1.48400200  | -3.24080700 | -1.48125900 |
| C  | 0.65447800  | 2.39188000  | 0.71719000  |
| C  | 1.88912200  | 1.96270300  | 1.24416500  |
| C  | 3.08771100  | 2.19805600  | 0.55735700  |
| C  | 3.04848200  | 2.87502400  | -0.65898000 |
| C  | 1.84822000  | 3.32967000  | -1.20081500 |
| C  | 0.65650600  | 3.09086300  | -0.50349100 |
| C  | -0.59743400 | 2.25228100  | 1.52851100  |
| C  | -1.49634200 | 1.16373500  | 1.43702900  |
| C  | -2.63061700 | 1.17104600  | 2.26926100  |
| C  | -2.88130000 | 2.20500700  | 3.16996500  |
| C  | -1.99147400 | 3.27344900  | 3.25580100  |
| C  | -0.86526700 | 3.28773000  | 2.43772200  |
| H  | 4.03340600  | 1.84292200  | 0.94623900  |
| H  | 1.84890600  | 3.86512600  | -2.14223400 |
| H  | -3.34071000 | 0.35309200  | 2.22297800  |
| H  | -3.76824400 | 2.17142500  | 3.79737400  |
| H  | -2.16999500 | 4.08834700  | 3.95238000  |
| H  | -0.16419500 | 4.11561700  | 2.49760200  |
| C  | 2.78600300  | -1.74938900 | -0.82663200 |
| C  | 3.51777600  | -2.08434600 | 0.33089500  |
| C  | 3.37348200  | -0.99151900 | -1.85870900 |
| C  | 4.80879700  | -1.57437400 | 0.48371000  |
| H  | 3.08380200  | -2.74386000 | 1.07536900  |
| C  | 4.66377600  | -0.49189600 | -1.67824200 |
| C  | 5.38484700  | -0.78078400 | -0.51470600 |
| H  | 5.11400200  | 0.11288700  | -2.46168100 |
| C  | -0.63452400 | 4.30043500  | -2.11997500 |
| H  | -0.29072700 | 3.73619500  | -2.99700400 |
| H  | -1.68710000 | 4.55979200  | -2.24883300 |

|   |             |             |             |
|---|-------------|-------------|-------------|
| H | -0.04260300 | 5.22041600  | -2.02863300 |
| C | 3.02736300  | 0.92430500  | 3.07513000  |
| H | 3.55123200  | 0.17339000  | 2.47238500  |
| H | 3.69308800  | 1.77839400  | 3.25853900  |
| H | 2.73309900  | 0.48466500  | 4.02989800  |
| H | 3.97581200  | 3.05416100  | -1.19625000 |
| O | -0.57035700 | 3.52218900  | -0.93581400 |
| O | 1.81856200  | 1.33597000  | 2.45366400  |
| C | -2.22225300 | -1.64797200 | 0.93209100  |
| C | -2.31963800 | -2.82448300 | -0.06489500 |
| C | -1.58391000 | -2.12378900 | 2.25730800  |
| H | -3.24617000 | -1.30870700 | 1.13880900  |
| C | -3.07325400 | -4.02006500 | 0.54401000  |
| H | -1.30945200 | -3.13709800 | -0.36013500 |
| H | -2.82938100 | -2.50912200 | -0.98182200 |
| C | -2.33770900 | -3.32110300 | 2.85999200  |
| H | -0.54172700 | -2.41337900 | 2.05947200  |
| H | -1.54645100 | -1.30236100 | 2.98192600  |
| C | -2.43971300 | -4.48333100 | 1.86267900  |
| H | -3.09471500 | -4.84497600 | -0.17958200 |
| H | -4.12102100 | -3.73595300 | 0.72565300  |
| H | -1.83436100 | -3.64734500 | 3.77931100  |
| H | -3.34978200 | -3.00436700 | 3.15447700  |
| H | -3.01921300 | -5.30917900 | 2.29513100  |
| H | -1.43263600 | -4.87641000 | 1.66060600  |
| C | -2.20363200 | 0.45139800  | -1.26347300 |
| C | -1.80232700 | -0.20918700 | -2.59963300 |
| C | -3.73543600 | 0.47271300  | -1.09247100 |
| H | -1.86093200 | 1.49474100  | -1.30131800 |
| C | -2.49227400 | 0.48256400  | -3.78822300 |
| H | -2.07668300 | -1.27200000 | -2.59611700 |
| H | -0.71256800 | -0.17599200 | -2.71897100 |
| C | -4.41868400 | 1.16235200  | -2.28773900 |
| H | -4.11794000 | -0.55451200 | -1.01390400 |
| H | -4.00863600 | 0.98746400  | -0.16388600 |
| C | -4.01877400 | 0.51295400  | -3.62051100 |
| H | -2.22089400 | -0.02559000 | -4.72260300 |
| H | -2.11794000 | 1.51419200  | -3.87306800 |
| H | -5.50876400 | 1.13377400  | -2.16001800 |
| H | -4.13348900 | 2.22478600  | -2.30060300 |
| H | -4.48500100 | 1.04604800  | -4.45923900 |
| H | -4.40525700 | -0.51673900 | -3.65115400 |
| H | 2.82692800  | -0.81213000 | -2.77875400 |
| H | 5.37566100  | -1.81980000 | 1.37899900  |
| H | 6.39957400  | -0.41058300 | -0.39730600 |

**4<sub>sp</sub><sup>+</sup> [Pd(SPhos)(Ph···Cl)]<sup>+</sup> (conformer c) *trans* halide**

|    |             |             |             |
|----|-------------|-------------|-------------|
| Pd | -0.56759900 | -1.16361100 | -0.46409400 |
| P  | 0.03486100  | 0.94452600  | 0.29295200  |
| Cl | -1.20494200 | -3.31406200 | -1.39035200 |
| C  | 2.65834700  | -1.01355900 | 0.42282000  |
| C  | 2.29236800  | -2.28791100 | 0.90095300  |
| C  | 2.46979400  | -3.43329300 | 0.11352800  |
| C  | 3.02123600  | -3.30133700 | -1.15861800 |
| C  | 3.40634900  | -2.05902200 | -1.65839500 |
| C  | 3.22977700  | -0.92159700 | -0.85963600 |
| C  | 2.60130100  | 0.17449600  | 1.33571700  |

|   |             |             |             |                                                                                   |             |             |             |
|---|-------------|-------------|-------------|-----------------------------------------------------------------------------------|-------------|-------------|-------------|
| C | 1.52280200  | 1.08753300  | 1.41444200  | C                                                                                 | -3.17532900 | -1.34970500 | -2.01853800 |
| C | 1.61769200  | 2.14239600  | 2.34180800  | C                                                                                 | -3.28934600 | -2.26438500 | 0.24453500  |
| C | 2.72819700  | 2.30721500  | 3.16771200  | C                                                                                 | -4.46187700 | -0.83662900 | -1.86142300 |
| C | 3.78839700  | 1.40782600  | 3.08121800  | H                                                                                 | -2.63555500 | -1.22997000 | -2.95141600 |
| C | 3.71513500  | 0.35707400  | 2.17148800  | C                                                                                 | -4.57597200 | -1.74113100 | 0.37622600  |
| H | 2.17671200  | -4.41077200 | 0.47546100  | H                                                                                 | -2.83995000 | -2.84739100 | 1.04080400  |
| H | 3.83793400  | -1.98650000 | -2.64899800 | C                                                                                 | -5.16802600 | -1.02299600 | -0.66763600 |
| H | 0.80753800  | 2.85709900  | 2.43187500  | H                                                                                 | -4.91967600 | -0.29672000 | -2.68665600 |
| H | 2.75991300  | 3.13495000  | 3.87157500  | H                                                                                 | -5.12373500 | -1.91199600 | 1.29980600  |
| H | 4.66317900  | 1.51948400  | 3.71643900  | H                                                                                 | -6.17626300 | -0.63368900 | -0.56130000 |
| H | 4.53400700  | -0.35343900 | 2.10060900  |                                                                                   |             |             |             |
| C | 4.22001800  | 0.49841200  | -2.51440000 |                                                                                   |             |             |             |
| H | 3.55375300  | 0.19918200  | -3.33405500 | <b>4<sub>sr</sub><sup>*</sup> [Pd(SPhos)(PhCl)]<sup>‡</sup> (conformer c) ???</b> |             |             |             |
| H | 4.44617600  | 1.56272200  | -2.60326900 | Pd                                                                                | 2.49773600  | 0.04649400  | -0.11220000 |
| H | 5.15267700  | -0.07702200 | -2.57908400 | P                                                                                 | 0.10470200  | 0.23354500  | -0.18053100 |
| C | 1.32024000  | -3.54680800 | 2.68724300  | Cl                                                                                | 4.33324900  | 1.44287700  | -1.10801900 |
| H | 0.51483900  | -3.96573400 | 2.07109700  | O                                                                                 | -3.32059600 | 1.91662100  | 1.27862000  |
| H | 2.13525400  | -4.27848600 | 2.76969500  | O                                                                                 | -3.19930900 | -2.74030800 | 0.72703800  |
| H | 0.93630700  | -3.32325800 | 3.68418600  | C                                                                                 | -0.67953700 | -0.31674600 | 1.43329100  |
| H | 3.15720500  | -4.18688100 | -1.77363600 | C                                                                                 | -2.03708900 | -0.50253000 | 1.80492400  |
| O | 3.59816700  | 0.33915000  | -1.24949800 | C                                                                                 | -3.23590200 | -0.40066700 | 0.91008900  |
| O | 1.77949900  | -2.31027600 | 2.16536300  | C                                                                                 | -3.89686000 | 0.82322700  | 0.69607700  |
| C | -1.32566400 | 1.79967800  | 1.27931600  | C                                                                                 | -5.08090500 | 0.88736700  | -0.05345300 |
| C | -2.60689900 | 1.98121300  | 0.43727800  | H                                                                                 | -5.57544700 | 1.83377700  | -0.23424200 |
| C | -1.63677300 | 0.99995700  | 2.56328300  | C                                                                                 | -5.62974000 | -0.28872700 | -0.55705300 |
| H | -0.97822600 | 2.80131900  | 1.56684100  | H                                                                                 | -6.54669200 | -0.24233600 | -1.13824100 |
| C | -3.73609900 | 2.62887500  | 1.25905400  | C                                                                                 | -5.03256300 | -1.52533300 | -0.32072700 |
| H | -2.93795600 | 1.00446300  | 0.06438800  | H                                                                                 | -5.48737500 | -2.42814900 | -0.70924800 |
| H | -2.40169200 | 2.59976300  | -0.44375500 | C                                                                                 | -3.84539500 | -1.57565700 | 0.42234000  |
| C | -2.76654100 | 1.64956100  | 3.38015400  | C                                                                                 | -2.33716400 | -0.85442300 | 3.13234900  |
| H | -1.93199600 | -0.01862300 | 2.27664200  | H                                                                                 | -3.38066600 | -0.99635000 | 3.39958000  |
| H | -0.73711500 | 0.90312100  | 3.18118600  | C                                                                                 | -1.35194300 | -1.02873100 | 4.09985600  |
| C | -4.03625200 | 1.83615000  | 2.53818600  | H                                                                                 | -1.62807000 | -1.29876200 | 5.11582600  |
| H | -4.63861900 | 2.70957200  | 0.63950700  | C                                                                                 | -0.01761400 | -0.86047300 | 3.74328800  |
| H | -3.44868900 | 3.65670200  | 1.52824500  | H                                                                                 | 0.77658500  | -0.99851700 | 4.47202300  |
| H | -2.98054900 | 1.03652600  | 4.26550500  | C                                                                                 | 0.29795400  | -0.51407600 | 2.43147400  |
| H | -2.43079800 | 2.62891400  | 3.75377100  | H                                                                                 | 1.34381800  | -0.38782800 | 2.15937300  |
| H | -4.81476900 | 2.34012300  | 3.12579400  | C                                                                                 | -3.80636900 | -3.97206800 | 0.36758300  |
| H | -4.43533500 | 0.84961000  | 2.26220400  | H                                                                                 | -4.80518800 | -4.07153400 | 0.81160100  |
| C | 0.55215500  | 2.14790300  | -1.08079800 | H                                                                                 | -3.15288700 | -4.75019900 | 0.76564900  |
| C | -0.22142500 | 1.92685300  | -2.39799400 | H                                                                                 | -3.88121600 | -4.08611700 | -0.72164100 |
| C | 0.57334200  | 3.64084800  | -0.69961400 | C                                                                                 | -4.04527700 | 3.13822400  | 1.28421200  |
| H | 1.59043700  | 1.83407600  | -1.25996300 | H                                                                                 | -4.15099700 | 3.55409300  | 0.27382700  |
| C | 0.35849300  | 2.78743600  | -3.53400500 | H                                                                                 | -3.46034100 | 3.82753800  | 1.89475600  |
| H | -1.28144900 | 2.18174000  | -2.26301100 | H                                                                                 | -5.04053600 | 3.00910000  | 1.72813100  |
| H | -0.19042500 | 0.86418100  | -2.66607400 | C                                                                                 | -0.45558500 | 2.00853700  | -0.46070200 |
| C | 1.14809700  | 4.49910700  | -1.84207300 | H                                                                                 | -1.54591000 | 2.02459300  | -0.58060800 |
| H | -0.44732700 | 3.98391400  | -0.47863400 | C                                                                                 | 0.20776000  | 2.56391100  | -1.74185700 |
| H | 1.16732600  | 3.79646900  | 0.20805300  | H                                                                                 | 1.29752900  | 2.45386100  | -1.65438800 |
| C | 0.39115300  | 4.27635500  | -3.15925500 | H                                                                                 | -0.09430600 | 1.98175000  | -2.62081000 |
| H | -0.22580800 | 2.63692300  | -4.45125900 | C                                                                                 | -0.13549700 | 4.04640600  | -1.96753500 |
| H | 1.38185600  | 2.44868500  | -3.75620500 | H                                                                                 | 0.37649900  | 4.40765900  | -2.86856000 |
| H | 1.12064800  | 5.55985700  | -1.55993100 | H                                                                                 | -1.21494100 | 4.14830000  | -2.15786200 |
| H | 2.20803200  | 4.24139100  | -1.98453400 | C                                                                                 | 0.24901400  | 4.90198900  | -0.75328300 |
| H | 0.84869700  | 4.86428500  | -3.96557500 | H                                                                                 | 1.34167400  | 4.88465800  | -0.63114500 |
| H | -0.64026400 | 4.64438600  | -3.05124400 | H                                                                                 | -0.03300600 | 5.95008500  | -0.91829900 |
| C | -2.56918300 | -2.01596600 | -0.93791100 | C                                                                                 | -0.41312700 | 4.36503900  | 0.52285400  |

|                                                                   |             |             |             |                                                                   |             |             |             |
|-------------------------------------------------------------------|-------------|-------------|-------------|-------------------------------------------------------------------|-------------|-------------|-------------|
| H                                                                 | -1.50297600 | 4.48932000  | 0.43901900  | C                                                                 | -2.15804600 | -0.93555500 | -0.81394200 |
| H                                                                 | -0.09787300 | 4.95301700  | 1.39485100  | C                                                                 | -2.03450300 | -2.34670400 | -0.19136200 |
| C                                                                 | -0.08686800 | 2.88017300  | 0.75849800  | C                                                                 | -2.99097200 | -3.33903700 | -0.87515800 |
| H                                                                 | -0.61431500 | 2.51832700  | 1.64722400  | C                                                                 | -4.44385500 | -2.84232600 | -0.84686700 |
| H                                                                 | 0.99008500  | 2.77719900  | 0.95650300  | H                                                                 | -4.32257600 | -1.47306900 | -2.52123700 |
| C                                                                 | -0.51672000 | -0.73478400 | -1.67726500 | H                                                                 | -5.59796900 | -1.07350800 | -1.37453500 |
| H                                                                 | 0.26381500  | -0.46532000 | -2.40605400 | H                                                                 | -3.92504900 | -0.34168200 | 0.29825100  |
| C                                                                 | -0.39185400 | -2.25399000 | -1.43628400 | H                                                                 | -3.71658600 | 0.55155300  | -1.20664800 |
| H                                                                 | 0.60047200  | -2.48692200 | -1.02883800 | H                                                                 | -1.89475800 | -1.04309300 | -1.87644100 |
| H                                                                 | -1.12607200 | -2.56563400 | -0.68326800 | H                                                                 | -1.00400300 | -2.72221500 | -0.27676100 |
| C                                                                 | -0.61797100 | -3.04325000 | -2.73751600 | H                                                                 | -2.25778000 | -2.30430800 | 0.88220800  |
| H                                                                 | 0.20166300  | -2.82583800 | -3.43847800 | H                                                                 | -2.67432400 | -3.47995100 | -1.91893200 |
| H                                                                 | -0.57333700 | -4.12074500 | -2.53126700 | H                                                                 | -2.91077800 | -4.31916400 | -0.38984800 |
| C                                                                 | -1.95542900 | -2.68027700 | -3.40014000 | H                                                                 | -4.80064700 | -2.82143200 | 0.19358400  |
| H                                                                 | -2.78229200 | -3.00826800 | -2.75222800 | H                                                                 | -5.09423100 | -3.54262000 | -1.38538000 |
| H                                                                 | -2.06916400 | -3.21930900 | -4.34969400 | C                                                                 | -1.67593100 | 0.74335100  | 3.90828000  |
| C                                                                 | -2.07142100 | -1.16610900 | -3.62842000 | C                                                                 | -1.52597400 | 0.03856800  | 2.54868900  |
| H                                                                 | -1.31629800 | -0.85260000 | -4.36486700 | C                                                                 | -1.30816400 | 1.06436800  | 1.41391900  |
| H                                                                 | -3.05004700 | -0.91962800 | -4.06039400 | C                                                                 | -2.47260500 | 2.08018500  | 1.38034100  |
| C                                                                 | -1.86972100 | -0.37706100 | -2.32096000 | C                                                                 | -2.60628800 | 2.79229400  | 2.73904200  |
| H                                                                 | -2.68927300 | -0.60635600 | -1.63609500 | C                                                                 | -2.79964900 | 1.79057800  | 3.88625600  |
| H                                                                 | -1.92634900 | 0.69699800  | -2.53039800 | H                                                                 | -0.72573300 | 1.23427700  | 4.16459800  |
| C                                                                 | 5.94067100  | -2.39622700 | 1.21839500  | H                                                                 | -1.86307300 | -0.00226400 | 4.69102400  |
| C                                                                 | 5.65527000  | -1.22915700 | 1.93480200  | H                                                                 | -2.43521800 | -0.54410500 | 2.34689200  |
| C                                                                 | 4.93420700  | -0.18982700 | 1.34277600  | H                                                                 | -0.69467300 | -0.67602800 | 2.58243300  |
| C                                                                 | 4.45744100  | -0.36285100 | 0.03077500  | H                                                                 | -0.39107100 | 1.62016200  | 1.66044600  |
| C                                                                 | 4.78075800  | -1.50712000 | -0.72056200 | H                                                                 | -2.32861100 | 2.82408300  | 0.58968300  |
| C                                                                 | 5.50325000  | -2.53111000 | -0.10284400 | H                                                                 | -3.41334700 | 1.56374100  | 1.15745800  |
| H                                                                 | 6.51812200  | -3.19056900 | 1.68282200  | H                                                                 | -1.70194400 | 3.39031600  | 2.92413000  |
| H                                                                 | 6.00779900  | -1.11741500 | 2.95729000  | H                                                                 | -3.44557400 | 3.49838900  | 2.70309000  |
| H                                                                 | 4.74603500  | 0.73769600  | 1.87366300  | H                                                                 | -3.76685100 | 1.28126300  | 3.76140200  |
| H                                                                 | 4.47716000  | -1.58137700 | -1.75969100 | H                                                                 | -2.84679600 | 2.31753700  | 4.84732800  |
| H                                                                 | 5.73732300  | -3.43156100 | -0.66548100 | C                                                                 | 2.29482100  | 0.32517800  | 0.47539000  |
| <b>5<sub>Cy</sub> [Pd(PCy<sub>3</sub>)(Ph)(Br)] (conformer F)</b> |             |             |             | C                                                                 | 3.18698100  | 0.83115100  | -0.47647700 |
| Pd                                                                | 1.05565200  | -1.12646000 | -0.03724000 | C                                                                 | 2.34774200  | 0.77606700  | 1.79779900  |
| Br                                                                | 2.64316100  | -2.98465300 | 0.01639700  | C                                                                 | 4.11545400  | 1.80948100  | -0.10227000 |
| P                                                                 | -0.81318900 | 0.24234200  | -0.20221300 | H                                                                 | 3.17708800  | 0.45840700  | -1.49593100 |
| C                                                                 | -0.40988400 | 2.23907400  | -3.91986000 | C                                                                 | 3.28339100  | 1.75303000  | 2.16077500  |
| C                                                                 | -0.36839900 | 1.11577400  | -2.86869600 | H                                                                 | 1.68672700  | 0.36066900  | 2.55247900  |
| C                                                                 | -0.81663600 | 1.62374700  | -1.47864600 | C                                                                 | 4.16335600  | 2.27677200  | 1.21289800  |
| C                                                                 | 0.05353700  | 2.82955400  | -1.05469900 | H                                                                 | 4.80987500  | 2.19509000  | -0.84501100 |
| C                                                                 | 0.00120500  | 3.95215000  | -2.10610800 | H                                                                 | 3.32451400  | 2.09351900  | 3.19286300  |
| C                                                                 | 0.42882100  | 3.45061600  | -3.49173400 | H                                                                 | 4.88943100  | 3.03290600  | 1.49885700  |
| H                                                                 | -1.45316800 | 2.55378100  | -4.07186700 | <b>5<sub>Cy</sub> [Pd(PCy<sub>3</sub>)(Ph)(Br)] (conformer C)</b> |             |             |             |
| H                                                                 | -0.05803200 | 1.84936100  | -4.88323400 | Pd                                                                | 1.42098000  | -0.12029900 | 0.04336100  |
| H                                                                 | -0.99861300 | 0.28505600  | -3.20672900 | Br                                                                | 3.85887400  | -0.15892800 | 0.32834600  |
| H                                                                 | 0.65396700  | 0.72109900  | -2.79329100 | P                                                                 | -0.85125900 | -0.48782300 | -0.31402900 |
| H                                                                 | -1.85994800 | 1.96517300  | -1.56069000 | C                                                                 | 1.21776300  | 1.77964100  | 0.56935700  |
| H                                                                 | -0.26838800 | 3.22542300  | -0.08543700 | C                                                                 | 1.28656700  | 2.77134100  | -0.41507700 |
| H                                                                 | 1.09088800  | 2.49881600  | -0.92809300 | C                                                                 | 1.18258700  | 4.11919700  | -0.05129600 |
| H                                                                 | -1.02243300 | 4.35230700  | -2.16289600 | C                                                                 | 1.01681000  | 4.48049400  | 1.28715900  |
| H                                                                 | 0.64313700  | 4.78164300  | -1.78429900 | C                                                                 | 0.96740000  | 3.48670000  | 2.26656600  |
| H                                                                 | 1.49012700  | 3.16444800  | -3.46088300 | C                                                                 | 1.06987400  | 2.13536100  | 1.91386400  |
| H                                                                 | 0.34183800  | 4.25466200  | -4.23317500 | C                                                                 | -1.75520700 | -0.99115000 | 1.26332900  |
| C                                                                 | -4.56445800 | -1.43475500 | -1.44895400 | C                                                                 | -3.06308100 | -1.79134500 | 1.07498600  |
| C                                                                 | -3.61797400 | -0.44112400 | -0.75079100 | C                                                                 | -3.77719000 | -2.01075500 | 2.42165400  |

|                                                               |             |             |             |    |             |             |             |
|---------------------------------------------------------------|-------------|-------------|-------------|----|-------------|-------------|-------------|
| C                                                             | -2.85961200 | -2.68763200 | 3.44968300  | Cl | 1.53316800  | 3.79692100  | -0.44188200 |
| C                                                             | -1.55152900 | -1.90294000 | 3.62750000  | C  | 0.69494700  | -1.63084900 | 4.01366100  |
| C                                                             | -0.82953900 | -1.69011300 | 2.28636800  | C  | 0.29092100  | -0.66260800 | 2.88782000  |
| C                                                             | -1.87310700 | 0.90856000  | -1.08150300 | C  | -0.05898700 | -1.41750500 | 1.58440600  |
| C                                                             | -2.24892900 | 1.99969000  | -0.05122000 | C  | 1.12443400  | -2.32093200 | 1.16553300  |
| C                                                             | -2.83528800 | 3.23614100  | -0.75319500 | C  | 1.51460800  | -3.29124500 | 2.29408300  |
| C                                                             | -4.05539300 | 2.87474600  | -1.61098700 | C  | 1.85299900  | -2.54399900 | 3.59055000  |
| C                                                             | -3.72676600 | 1.74690300  | -2.59941200 | H  | -0.17327600 | -2.24809000 | 4.28900100  |
| C                                                             | -3.13036400 | 0.51522200  | -1.89158700 | H  | 0.96528100  | -1.05606100 | 4.90828500  |
| C                                                             | -1.01222100 | -1.92151500 | -1.53792300 | H  | -0.55341700 | -0.05091900 | 3.22664800  |
| C                                                             | -0.35978700 | -3.23226900 | -1.03793900 | H  | 1.11666100  | 0.03218000  | 2.68434900  |
| C                                                             | 1.17372000  | -3.21964000 | -1.10516100 | H  | -0.93075500 | -2.06008500 | 1.78233600  |
| C                                                             | 1.67341100  | -2.91429500 | -2.52287200 | H  | 0.88134300  | -2.89349500 | 0.26401700  |
| C                                                             | 1.07533700  | -1.60228700 | -3.04701900 | H  | 1.98601600  | -1.69160400 | 0.91448100  |
| C                                                             | -0.45914700 | -1.57919300 | -2.94759300 | H  | 0.68374900  | -3.98830200 | 2.48141800  |
| H                                                             | 1.43663700  | 2.50666400  | -1.45772800 | H  | 2.36698200  | -3.90137100 | 1.97013000  |
| H                                                             | 1.24261400  | 4.88515200  | -0.82107400 | H  | 2.75559800  | -1.93630100 | 3.43245000  |
| H                                                             | 0.93912400  | 5.52793300  | 1.56577100  | H  | 2.08906100  | -3.25545400 | 4.39179200  |
| H                                                             | 0.85791500  | 3.75664000  | 3.31435800  | C  | -4.63069700 | 0.24956900  | 1.56642700  |
| H                                                             | 1.04935600  | 1.37515700  | 2.68901200  | C  | -3.44721500 | -0.42509900 | 0.84920200  |
| H                                                             | -2.01888700 | -0.01816500 | 1.70161000  | C  | -2.20514200 | 0.48930200  | 0.85812400  |
| H                                                             | -2.83661200 | -2.76911100 | 0.62852800  | C  | -2.53614400 | 1.85453100  | 0.20928500  |
| H                                                             | -3.73847100 | -1.27950700 | 0.38095900  | C  | -3.72908600 | 2.52695100  | 0.91103200  |
| H                                                             | -4.10882600 | -1.03845100 | 2.81488100  | C  | -4.96285400 | 1.61312500  | 0.94261000  |
| H                                                             | -4.68356300 | -2.60893300 | 2.26364500  | H  | -4.38089800 | 0.38368500  | 2.62919600  |
| H                                                             | -2.62727800 | -3.70841700 | 3.11152300  | H  | -5.50645600 | -0.41090700 | 1.53261600  |
| H                                                             | -3.37793300 | -2.78816900 | 4.41138600  | H  | -3.73909300 | -0.63457400 | -0.18805200 |
| H                                                             | -1.77350700 | -0.92369100 | 4.07707600  | H  | -3.22792100 | -1.39130300 | 1.31942900  |
| H                                                             | -0.88450000 | -2.42333700 | 4.32578600  | H  | -1.96029700 | 0.69778900  | 1.90982300  |
| H                                                             | -0.50482200 | -2.66457400 | 1.89858600  | H  | -1.66818400 | 2.53007500  | 0.25531000  |
| H                                                             | 0.08115300  | -1.09853100 | 2.43154600  | H  | -2.76601500 | 1.71823000  | -0.85554600 |
| H                                                             | -1.15607800 | 1.36237300  | -1.78125000 | H  | -3.43939000 | 2.78366500  | 1.94043300  |
| H                                                             | -1.38204800 | 2.28945900  | 0.54733500  | H  | -3.96461500 | 3.47266900  | 0.40828900  |
| H                                                             | -3.00359500 | 1.59993100  | 0.64103000  | H  | -5.32928300 | 1.46116300  | -0.08355300 |
| H                                                             | -3.10553500 | 3.98854300  | -0.00198400 | H  | -5.77768500 | 2.09587800  | 1.49618000  |
| H                                                             | -2.05767100 | 3.69081600  | -1.38315600 | C  | -1.38387200 | -1.30956000 | -3.78127500 |
| H                                                             | -4.41953200 | 3.75745400  | -2.15148800 | C  | -1.41268800 | -0.48470000 | -2.48275500 |
| H                                                             | -4.87599100 | 2.55054700  | -0.95360900 | C  | -0.85112000 | -1.30133200 | -1.29715900 |
| H                                                             | -4.62531800 | 1.45044500  | -3.15543300 | C  | -1.64069900 | -2.61871400 | -1.12758900 |
| H                                                             | -3.00552400 | 2.11382300  | -3.34453900 | C  | -1.59754600 | -3.44360900 | -2.42742500 |
| H                                                             | -2.90591400 | -0.25318100 | -2.63757800 | C  | -2.13044000 | -2.64259700 | -3.62432900 |
| H                                                             | -3.88745900 | 0.09037300  | -1.21917300 | H  | -0.33777600 | -1.50862200 | -4.05644000 |
| H                                                             | -2.09148100 | -2.09670900 | -1.62820900 | H  | -1.81616600 | -0.72272400 | -4.60118800 |
| H                                                             | -0.72540100 | -4.04091400 | -1.68861800 | H  | -2.45026600 | -0.19122600 | -2.26949000 |
| H                                                             | -0.69844800 | -3.48301400 | -0.02817700 | H  | -0.84182200 | 0.44333400  | -2.60972000 |
| H                                                             | 1.58572300  | -2.46935900 | -0.40126900 | H  | 0.18233400  | -1.57254700 | -1.56073400 |
| H                                                             | 1.56847200  | -4.18096100 | -0.75373300 | H  | -1.24105500 | -3.21586000 | -0.30087800 |
| H                                                             | 1.38690600  | -3.74292000 | -3.18781300 | H  | -2.68567200 | -2.40048400 | -0.88158700 |
| H                                                             | 2.76770300  | -2.85908000 | -2.53325900 | H  | -0.56021600 | -3.75082000 | -2.62598300 |
| H                                                             | 1.49811900  | -0.76608700 | -2.46967600 | H  | -2.17685900 | -4.36637700 | -2.29678100 |
| H                                                             | 1.37095700  | -1.43774600 | -4.09077100 | H  | -3.20199500 | -2.44198800 | -3.47592400 |
| H                                                             | -0.86766000 | -2.33321300 | -3.63712100 | H  | -2.04864400 | -3.23432400 | -4.54451900 |
| H                                                             | -0.83724100 | -0.61282700 | -3.29975700 | C  | 2.35937000  | 0.65821800  | -0.57127800 |
| 5 <sub>Cy</sub> [Pd(PCy <sub>3</sub> )(Ph)(Cl)] (conformer F) |             |             |             | C  | 3.38633000  | 0.65483800  | 0.37941200  |
| Pd                                                            | 0.69942300  | 1.65339100  | -0.17912800 | C  | 2.55300600  | 0.05136400  | -1.81583200 |
| P                                                             | -0.57797600 | -0.22987100 | 0.22236000  | C  | 4.59732600  | 0.01696400  | 0.08713500  |
|                                                               |             |             |             | H  | 3.25780600  | 1.15831400  | 1.33235600  |

|   |            |             |             |
|---|------------|-------------|-------------|
| C | 3.77104800 | -0.57925400 | -2.09896400 |
| H | 1.77643200 | 0.08041900  | -2.57438300 |
| C | 4.79185000 | -0.60520200 | -1.14799700 |
| H | 5.39297200 | 0.02115100  | 0.82845500  |
| H | 3.91757200 | -1.04270200 | -3.07190000 |
| H | 5.73618200 | -1.09396600 | -1.37187800 |

# 5<sub>H</sub> [Pd(PH<sub>3</sub>)(Ph)(Br)]

|    |             |             |             |
|----|-------------|-------------|-------------|
| Pd | 0.73386600  | 0.64395100  | -0.00014200 |
| Br | 2.00691800  | -1.40615200 | -0.00008100 |
| P  | -0.26058900 | 2.70815900  | 0.00041500  |
| C  | -3.61475700 | -1.31444100 | 0.00005700  |
| C  | -2.97877800 | -1.02212500 | -1.20757600 |
| C  | -1.70811000 | -0.43384400 | -1.21713200 |
| C  | -1.08814100 | -0.14530700 | -0.00006700 |
| C  | -1.70745300 | -0.43497800 | 1.21705300  |
| C  | -2.97814600 | -1.02321800 | 1.20761900  |
| H  | -4.59950000 | -1.77330800 | 0.00010300  |
| H  | -3.46246200 | -1.25600700 | -2.15261500 |
| H  | -1.21118700 | -0.22762700 | -2.16004900 |
| H  | -1.21001100 | -0.22969200 | 2.15990000  |
| H  | -3.46131100 | -1.25798600 | 2.15270200  |
| H  | 0.54429900  | 3.87202300  | 0.00130500  |
| H  | -1.11900600 | 3.04251000  | 1.07055600  |
| H  | -1.11964300 | 3.04476400  | -1.06848100 |

# 5<sub>H</sub> [Pd(PH<sub>3</sub>)(Ph)(Cl)]

|    |             |             |             |
|----|-------------|-------------|-------------|
| Pd | -1.12235700 | 0.01166600  | -0.00483200 |
| P  | -0.96181700 | 2.28446600  | 0.01714300  |
| Cl | -1.51310900 | -2.24127400 | -0.00610800 |
| C  | 3.63949700  | -0.21740900 | 0.00117200  |
| C  | 2.93815800  | -0.19856100 | 1.20781600  |
| C  | 1.54076300  | -0.11057300 | 1.21595600  |
| C  | 0.86135600  | -0.04197500 | -0.00144900 |
| C  | 1.54602700  | -0.06471500 | -1.21770100 |
| C  | 2.94338200  | -0.15340900 | -1.20695100 |
| H  | 4.72361500  | -0.28814500 | 0.00219900  |
| H  | 3.47173300  | -0.25954300 | 2.15297700  |
| H  | 1.00040200  | -0.11711400 | 2.15748500  |
| H  | 1.00994500  | -0.03459700 | -2.16127400 |
| H  | 3.48104400  | -0.17868200 | -2.15142600 |
| H  | -2.14254200 | 3.06413100  | 0.00838900  |
| H  | -0.27452600 | 2.92731200  | -1.03550500 |
| H  | -0.30625300 | 2.90452600  | 1.10308200  |

# 5<sub>Ph</sub> [Pd(PPh<sub>3</sub>)(Ph)(Br)]

|    |             |             |             |
|----|-------------|-------------|-------------|
| Pd | -1.19138200 | -0.91525200 | 0.01693300  |
| Br | -3.14192400 | -2.37381300 | 0.07512500  |
| P  | 0.92192900  | 0.00999400  | -0.01892000 |
| C  | -3.44167600 | 3.29132000  | -0.08642100 |
| C  | -3.34746900 | 2.50298500  | -1.23535000 |
| C  | -2.67201000 | 1.27784200  | -1.20351200 |
| C  | -2.08744100 | 0.84868500  | -0.00834400 |
| C  | -2.18260700 | 1.62368700  | 1.15002600  |
| C  | -2.86253300 | 2.84794200  | 1.10365500  |
| H  | -3.97002300 | 4.24044700  | -0.11634200 |

|   |             |             |             |
|---|-------------|-------------|-------------|
| H | -3.80677700 | 2.83220500  | -2.16428800 |
| H | -2.61722600 | 0.66625200  | -2.09823200 |
| H | -1.73617200 | 1.29150400  | 2.08199800  |
| H | -2.93739300 | 3.44907500  | 2.00676800  |
| C | 3.64359600  | -3.64538900 | -0.93088800 |
| C | 4.07195800  | -2.69213300 | -0.00419600 |
| C | 3.27665100  | -1.58158000 | 0.28217200  |
| C | 2.04055200  | -1.41316300 | -0.36096300 |
| C | 1.61463900  | -2.38025700 | -1.28934500 |
| C | 2.41452200  | -3.48764800 | -1.57427000 |
| H | 4.26349300  | -4.51125600 | -1.14645400 |
| H | 5.02656200  | -2.81326500 | 0.50051400  |
| H | 3.61674100  | -0.84993200 | 1.00826500  |
| H | 0.65478300  | -2.26816800 | -1.78916800 |
| H | 2.07120200  | -4.22885700 | -2.29026300 |
| C | 1.93385100  | 3.26604200  | -3.17526100 |
| C | 0.99623100  | 3.51461700  | -2.16964700 |
| C | 0.70305900  | 2.53371900  | -1.22328500 |
| C | 1.35657200  | 1.28912100  | -1.26799800 |
| C | 2.29896600  | 1.04746800  | -2.27880900 |
| C | 2.58260600  | 2.03208100  | -3.22793100 |
| H | 2.15571100  | 4.03068000  | -3.91473000 |
| H | 0.48399800  | 4.47160100  | -2.12397300 |
| H | -0.03411100 | 2.73662800  | -0.45325000 |
| H | 2.81435800  | 0.09398100  | -2.32743500 |
| H | 3.31396900  | 1.83152500  | -4.00613100 |
| C | 2.35183000  | 1.63610200  | 4.08869200  |
| C | 2.89972100  | 2.16442300  | 2.91813500  |
| C | 2.47561000  | 1.69963200  | 1.67158300  |
| C | 1.49532200  | 0.69886300  | 1.58674200  |
| C | 0.94473000  | 0.17718400  | 2.76915500  |
| C | 1.37454000  | 0.64095100  | 4.01266700  |
| H | 2.68139100  | 2.00237900  | 5.05712200  |
| H | 3.65715700  | 2.94162700  | 2.97263000  |
| H | 2.90361100  | 2.12075000  | 0.76707700  |
| H | 0.17371700  | -0.58772700 | 2.71192000  |
| H | 0.93965700  | 0.23074500  | 4.91982100  |

# 5<sub>Ph</sub> [Pd(PPh<sub>3</sub>)(Ph)(Br)]

|    |             |             |             |
|----|-------------|-------------|-------------|
| Pd | -1.19138200 | -0.91525200 | 0.01693300  |
| Br | -3.14192400 | -2.37381300 | 0.07512500  |
| P  | 0.92192900  | 0.00999400  | -0.01892000 |
| C  | -3.44167600 | 3.29132000  | -0.08642100 |
| C  | -3.34746900 | 2.50298500  | -1.23535000 |
| C  | -2.67201000 | 1.27784200  | -1.20351200 |
| C  | -2.08744100 | 0.84868500  | -0.00834400 |
| C  | -2.18260700 | 1.62368700  | 1.15002600  |
| C  | -2.86253300 | 2.84794200  | 1.10365500  |
| H  | -3.97002300 | 4.24044700  | -0.11634200 |
| H  | -3.80677700 | 2.83220500  | -2.16428800 |
| H  | -2.61722600 | 0.66625200  | -2.09823200 |
| H  | -1.73617200 | 1.29150400  | 2.08199800  |
| H  | -2.93739300 | 3.44907500  | 2.00676800  |
| C  | 3.64359600  | -3.64538900 | -0.93088800 |
| C  | 4.07195800  | -2.69213300 | -0.00419600 |
| C  | 3.27665100  | -1.58158000 | 0.28217200  |
| C  | 2.04055200  | -1.41316300 | -0.36096300 |

|   |             |             |             |
|---|-------------|-------------|-------------|
| C | 1.61463900  | -2.38025700 | -1.28934500 |
| C | 2.41452200  | -3.48764800 | -1.57427000 |
| H | 4.26349300  | -4.51125600 | -1.14645400 |
| H | 5.02656200  | -2.81326500 | 0.50051400  |
| H | 3.61674100  | -0.84993200 | 1.00826500  |
| H | 0.65478300  | -2.26816800 | -1.78916800 |
| H | 2.07120200  | -4.22885700 | -2.29026300 |
| C | 1.93385100  | 3.26604200  | -3.17526100 |
| C | 0.99623100  | 3.51461700  | -2.16964700 |
| C | 0.70305900  | 2.53371900  | -1.22328500 |
| C | 1.35657200  | 1.28912100  | -1.26799800 |
| C | 2.29896600  | 1.04746800  | -2.27880900 |
| C | 2.58260600  | 2.03208100  | -3.22793100 |
| H | 2.15571100  | 4.03068000  | -3.91473000 |
| H | 0.48399800  | 4.47160100  | -2.12397300 |
| H | -0.03411100 | 2.73662800  | -0.45325000 |
| H | 2.81435800  | 0.09398100  | -2.32743500 |
| H | 3.31396900  | 1.83152500  | -4.00613100 |
| C | 2.35183000  | 1.63610200  | 4.08869200  |
| C | 2.89972100  | 2.16442300  | 2.91813500  |
| C | 2.47561000  | 1.69963200  | 1.67158300  |
| C | 1.49532200  | 0.69886300  | 1.58674200  |
| C | 0.94473000  | 0.17718400  | 2.76915500  |
| C | 1.37454000  | 0.64095100  | 4.01266700  |
| H | 2.68139100  | 2.00237900  | 5.05712200  |
| H | 3.65715700  | 2.94162700  | 2.97263000  |
| H | 2.90361100  | 2.12075000  | 0.76707700  |
| H | 0.17371700  | -0.58772700 | 2.71192000  |
| H | 0.93965700  | 0.23074500  | 4.91982100  |

# 5<sub>Ph</sub> [Pd(PPh<sub>3</sub>)(Ph)(Cl)]

|    |             |             |             |
|----|-------------|-------------|-------------|
| Pd | -0.82045500 | -1.59893700 | 0.05206800  |
| P  | 0.68520900  | 0.13241200  | -0.02476100 |
| Cl | -1.92298700 | -3.62162700 | 0.18123500  |
| C  | -4.66378100 | 1.22453600  | -0.06669400 |
| C  | -4.26413500 | 0.50944800  | -1.19780700 |
| C  | -3.12454500 | -0.30150700 | -1.16030700 |
| C  | -2.38286000 | -0.38705200 | 0.02161600  |
| C  | -2.77857300 | 0.31447000  | 1.16299200  |
| C  | -3.92265700 | 1.12177400  | 1.11161600  |
| H  | -5.55121000 | 1.85082500  | -0.10112100 |
| H  | -4.84226100 | 0.57133800  | -2.11665500 |
| H  | -2.83161600 | -0.86560500 | -2.03988900 |
| H  | -2.21119700 | 0.24421300  | 2.08568800  |
| H  | -4.22979700 | 1.66619300  | 2.00147900  |
| C  | 4.71170200  | -2.03337000 | -0.86668400 |
| C  | 4.68051800  | -0.99137100 | 0.06268200  |
| C  | 3.48658600  | -0.31789400 | 0.32581100  |
| C  | 2.30758400  | -0.68248000 | -0.34215700 |
| C  | 2.34688000  | -1.73617300 | -1.27356600 |
| C  | 3.54370800  | -2.40371600 | -1.53626200 |
| H  | 5.64208500  | -2.55847600 | -1.06444000 |
| H  | 5.58696700  | -0.70172500 | 0.58720600  |
| H  | 3.47371100  | 0.48795500  | 1.05269300  |
| H  | 1.43964400  | -2.03586900 | -1.79387900 |
| H  | 3.55848400  | -3.21789800 | -2.25517800 |
| C  | 0.21549300  | 3.42571300  | -3.26966800 |

|   |             |             |             |
|---|-------------|-------------|-------------|
| C | -0.74564700 | 3.26981000  | -2.26765600 |
| C | -0.59424700 | 2.28240900  | -1.29498100 |
| C | 0.53371700  | 1.44221600  | -1.30873600 |
| C | 1.49612100  | 1.60671000  | -2.31590100 |
| C | 1.33432400  | 2.59274800  | -3.29175600 |
| H | 0.09096900  | 4.19189600  | -4.03005300 |
| H | -1.62174600 | 3.91188900  | -2.24562800 |
| H | -1.35411400 | 2.16543100  | -0.52897700 |
| H | 2.37339000  | 0.96887600  | -2.34084000 |
| H | 2.08699700  | 2.70826500  | -4.06693200 |
| C | 1.29282000  | 2.31902000  | 4.02633300  |
| C | 1.53670400  | 3.00802000  | 2.83672600  |
| C | 1.34775500  | 2.37488000  | 1.60649500  |
| C | 0.91020400  | 1.04258700  | 1.55723700  |
| C | 0.66266700  | 0.35795600  | 2.75871300  |
| C | 0.85708900  | 0.99244300  | 3.98571200  |
| H | 1.43734800  | 2.81536100  | 4.98204800  |
| H | 1.87290100  | 4.04097200  | 2.86329800  |
| H | 1.53656100  | 2.91999800  | 0.68690900  |
| H | 0.31161300  | -0.67095400 | 2.72912300  |
| H | 0.66031500  | 0.45282600  | 4.90790000  |

# 5<sub>SP</sub> [Pd(SPhos)(Ph)(Br)] (conformer a)

|    |             |             |             |
|----|-------------|-------------|-------------|
| Pd | -0.50524600 | -0.99216700 | -0.20217300 |
| Br | -1.97444800 | -2.92263300 | -0.75338900 |
| P  | 0.92614000  | 0.79154800  | 0.18197300  |
| O  | -2.54777600 | 1.68267500  | -1.77997600 |
| O  | -2.08334300 | 0.36278900  | 2.70089900  |
| C  | -1.46746800 | 2.18139700  | 0.72522400  |
| C  | -0.06333500 | 2.26193800  | 0.69807500  |
| C  | 0.55894800  | 3.46746000  | 1.07429000  |
| H  | 1.64092200  | 3.53726700  | 1.08824900  |
| C  | -1.57808400 | 4.51268700  | 1.44367200  |
| H  | -2.17412800 | 5.37622700  | 1.72649600  |
| C  | -2.27967300 | 0.94687900  | 0.43330100  |
| C  | -2.20437700 | 3.32075600  | 1.09403300  |
| H  | -3.28877700 | 3.25575000  | 1.11337900  |
| C  | 0.87155600  | 1.51255300  | -2.54935600 |
| H  | 0.20008800  | 0.65123000  | -2.64114700 |
| H  | 0.23329700  | 2.37964000  | -2.33291700 |
| C  | -2.74878300 | 0.16814500  | 1.52908700  |
| C  | -2.99269200 | 0.85567900  | -0.79448600 |
| C  | -4.09143500 | 0.00491600  | -0.93051500 |
| H  | -4.61164200 | -0.09234300 | -1.87444100 |
| C  | 1.85255200  | 1.29661600  | -1.37640700 |
| H  | 2.44212400  | 0.39585900  | -1.59868300 |
| C  | -3.15778400 | 1.59477900  | -3.06228500 |
| H  | -3.05719400 | 0.58669200  | -3.48145200 |
| H  | -2.62477900 | 2.30858600  | -3.69225800 |
| H  | -4.21914000 | 1.87035700  | -3.01979100 |
| C  | 2.22953700  | 0.68004000  | 1.53386100  |
| H  | 2.59680300  | 1.70608000  | 1.68139400  |
| C  | -0.18465600 | 4.58532100  | 1.44195000  |
| H  | 0.32112000  | 5.50408900  | 1.72621100  |
| C  | -4.50037400 | -0.75229100 | 0.16492700  |
| H  | -5.34382200 | -1.42681600 | 0.05358900  |
| C  | 2.82286600  | 2.49062700  | -1.26780600 |

|                                                         |             |             |             |   |             |             |             |
|---------------------------------------------------------|-------------|-------------|-------------|---|-------------|-------------|-------------|
| H                                                       | 3.53714300  | 2.34740300  | -0.44836600 | H | -5.83398600 | -2.35108800 | 1.41244800  |
| H                                                       | 2.25582400  | 3.40317800  | -1.04526700 | C | -5.11929400 | -0.50438500 | 0.58694300  |
| C                                                       | -3.84922400 | -0.68181900 | 1.39339200  | H | -5.91664800 | 0.08132500  | 1.02749600  |
| H                                                       | -4.18484500 | -1.29919200 | 2.21635400  | C | -4.13886100 | 0.09671400  | -0.21575600 |
| C                                                       | 1.58927400  | 0.21556200  | 2.86019300  | C | -2.55318400 | 0.00693800  | -3.05771800 |
| H                                                       | 0.74217300  | 0.85960800  | 3.12246000  | H | -3.56217700 | -0.33553300 | -3.26884400 |
| H                                                       | 1.18265800  | -0.79548300 | 2.72231100  | C | -1.75351200 | 0.47034500  | -4.09709100 |
| C                                                       | -2.43406500 | -0.44341700 | 3.81959400  | H | -2.14159900 | 0.49914100  | -5.11160500 |
| H                                                       | -3.46771000 | -0.25817400 | 4.13773500  | C | -0.44832800 | 0.87128100  | -3.82198900 |
| H                                                       | -1.75250500 | -0.15039100 | 4.61959700  | H | 0.21036400  | 1.21207400  | -4.61587400 |
| H                                                       | -2.30393100 | -1.50882100 | 3.59611800  | C | 0.01799800  | 0.81753700  | -2.51159700 |
| C                                                       | 2.62391800  | 2.90166500  | -3.76747000 | H | 1.04801400  | 1.10182700  | -2.31191700 |
| H                                                       | 2.07267700  | 3.84290300  | -3.62402200 | C | -5.19958700 | 2.23854800  | -0.05945800 |
| H                                                       | 3.18579200  | 3.00727800  | -4.70412700 | H | -6.16985100 | 1.88195900  | -0.42798300 |
| C                                                       | 3.58641800  | 2.69803200  | -2.58896600 | H | -5.00701000 | 3.23735400  | -0.45478100 |
| H                                                       | 4.26073200  | 3.55875100  | -2.49295700 | H | -5.22312200 | 2.28178400  | 1.03715100  |
| H                                                       | 4.22190400  | 1.82155700  | -2.78274300 | C | -2.05319300 | -4.15428900 | -1.08500500 |
| C                                                       | 3.44219300  | -0.20235000 | 1.17274500  | H | -1.93375200 | -4.46661400 | -0.04011900 |
| H                                                       | 3.92155700  | 0.15346400  | 0.25353100  | H | -1.17560100 | -4.46570600 | -1.65285200 |
| H                                                       | 3.10695800  | -1.22589600 | 0.97645000  | H | -2.95364100 | -4.62026700 | -1.50523100 |
| C                                                       | 1.62439600  | 1.74077600  | -3.87144500 | C | -0.76952400 | -0.28958600 | 1.60575700  |
| H                                                       | 2.16450000  | 0.82133100  | -4.14167300 | H | -1.84765400 | -0.16864800 | 1.45115300  |
| H                                                       | 0.90477300  | 1.92736400  | -4.67898100 | C | -0.40027400 | 0.32533100  | 2.97686100  |
| C                                                       | 2.62314700  | 0.20168000  | 3.99901700  | H | 0.68894900  | 0.27376500  | 3.11956500  |
| H                                                       | 2.95113500  | 1.23183700  | 4.20416000  | H | -0.67828900 | 1.38290400  | 3.02476100  |
| H                                                       | 2.15229400  | -0.16390900 | 4.92072300  | C | -1.10251600 | -0.42022900 | 4.12711200  |
| C                                                       | 3.84364700  | -0.65932500 | 3.64472300  | H | -0.79886000 | 0.02333400  | 5.08388700  |
| H                                                       | 4.58693300  | -0.61674000 | 4.45110200  | H | -2.18840400 | -0.26654900 | 4.04088500  |
| H                                                       | 3.53237100  | -1.71065100 | 3.55964100  | C | -0.80280400 | -1.92450600 | 4.11278400  |
| C                                                       | 4.47230500  | -0.21135700 | 2.31706800  | H | 0.26505400  | -2.08392800 | 4.32206000  |
| H                                                       | 5.30883100  | -0.86908400 | 2.04951000  | H | -1.35845000 | -2.42899100 | 4.91357500  |
| H                                                       | 4.89413600  | 0.79818500  | 2.43795800  | C | -1.14826600 | -2.53506600 | 2.74824100  |
| C                                                       | 3.11825800  | -4.01307200 | -1.17958100 | H | -2.23502600 | -2.48963500 | 2.58956500  |
| C                                                       | 2.68005800  | -3.11136200 | -2.14979000 | H | -0.86970500 | -3.59685300 | 2.72583000  |
| C                                                       | 1.63683200  | -2.21986500 | -1.87015000 | C | -0.42867800 | -1.79575900 | 1.60811900  |
| C                                                       | 1.02372400  | -2.21893700 | -0.61178600 | H | -0.67174600 | -2.24621200 | 0.64298700  |
| C                                                       | 1.45298200  | -3.13908900 | 0.35457800  | H | 0.65331400  | -1.90945200 | 1.73565200  |
| C                                                       | 2.49628700  | -4.02679200 | 0.07121300  | C | -0.07498100 | 2.43616200  | 0.59246000  |
| H                                                       | 3.92493900  | -4.70750800 | -1.39941700 | H | 0.40817500  | 2.51249200  | 1.57704300  |
| H                                                       | 3.13956200  | -3.10346900 | -3.13591400 | C | 0.73076800  | 3.33710300  | -0.36992600 |
| H                                                       | 1.29286500  | -1.54656100 | -2.65022400 | H | 1.77692300  | 3.00607100  | -0.43126600 |
| H                                                       | 0.96385400  | -3.18298100 | 1.32315400  | H | 0.31524000  | 3.25724500  | -1.38264300 |
| H                                                       | 2.81271600  | -4.73872200 | 0.83046600  | C | 0.68506200  | 4.80791400  | 0.07909400  |
| <b>5<sub>SP</sub> [Pd(SPhos)(Ph)(Br)] (conformer c)</b> |             |             |             | H | 1.19928600  | 4.90754600  | 1.04613300  |
| Pd                                                      | 2.41420900  | 0.36640600  | 0.04456200  | H | 1.24294300  | 5.42517700  | -0.63572100 |
| Br                                                      | 4.82144600  | 0.81723100  | 0.04770100  | C | -0.75848700 | 5.31209800  | 0.21240700  |
| P                                                       | 0.10081400  | 0.59312500  | 0.19111800  | H | -1.23177100 | 5.31878800  | -0.78055600 |
| O                                                       | -2.10066100 | -2.73865200 | -1.20406300 | H | -0.76886000 | 6.34854500  | 0.57246000  |
| O                                                       | -4.13529400 | 1.42548100  | -0.52994500 | C | -1.57150300 | 4.41265300  | 1.15386200  |
| C                                                       | -0.78843000 | 0.38723300  | -1.43517800 | H | -1.17154800 | 4.50130400  | 2.17504300  |
| C                                                       | -2.10386600 | -0.05317200 | -1.72601900 | H | -2.61526100 | 4.75051000  | 1.19940100  |
| C                                                       | -3.08708900 | -0.65954600 | -0.76787900 | C | -1.52569500 | 2.93719000  | 0.71529300  |
| C                                                       | -3.09608700 | -2.05539900 | -0.56987900 | H | -2.02811700 | 2.82163700  | -0.25182900 |
| C                                                       | -4.07820700 | -2.66893000 | 0.22056900  | H | -2.08975300 | 2.32406200  | 1.42788100  |
| H                                                       | -4.07717800 | -3.74038000 | 0.37809200  | C | 2.67235100  | -4.30998600 | -0.90026100 |
| C                                                       | -5.07244200 | -1.88087600 | 0.79632600  | C | 3.19506000  | -3.78127300 | 0.28215000  |
|                                                         |             |             |             | C | 3.08703600  | -2.41417200 | 0.55872700  |



|   |            |             |             |
|---|------------|-------------|-------------|
| C | 2.43726100 | -1.57378100 | -0.35417300 |
| C | 1.91673500 | -2.09225200 | -1.54145800 |
| C | 2.04075300 | -3.46214600 | -1.81056200 |
| H | 2.76862600 | -5.37114700 | -1.11486500 |
| H | 3.70730000 | -4.42718100 | 0.99139300  |
| H | 3.52540600 | -2.01065100 | 1.46533400  |
| H | 1.41720900 | -1.45284300 | -2.26105200 |
| H | 1.64310900 | -3.85658300 | -2.74329000 |

**5<sub>SP</sub> [Pd(SPhos)(Ph)(Cl)] (conformer a)**

|    |             |             |             |
|----|-------------|-------------|-------------|
| Pd | -0.30421700 | -1.16673200 | -0.54381500 |
| P  | 0.62938600  | 0.73755000  | 0.36266400  |
| Cl | -1.21966000 | -3.08954900 | -1.53798800 |
| O  | -2.89743400 | 1.29472500  | -1.64010300 |
| O  | -2.25432200 | -0.99545900 | 2.40537700  |
| C  | -2.04778200 | 1.36508700  | 0.99468000  |
| C  | -0.70443300 | 1.76502900  | 1.12027500  |
| C  | -0.40625500 | 2.94385300  | 1.82912500  |
| H  | 0.62569800  | 3.25126100  | 1.95757400  |
| C  | -2.74456000 | 3.35106100  | 2.23248900  |
| H  | -3.54145800 | 3.95730300  | 2.65485700  |
| C  | -2.52102400 | 0.09372300  | 0.34099800  |
| C  | -3.05115500 | 2.17714400  | 1.55154200  |
| H  | -4.08736900 | 1.86632900  | 1.45140600  |
| C  | 0.49579100  | 2.08125600  | -2.11768200 |
| H  | 0.06552100  | 1.13663300  | -2.46923700 |
| H  | -0.34725600 | 2.69359900  | -1.77075600 |
| C  | -2.80748000 | -1.03284100 | 1.16155400  |
| C  | -3.14232100 | 0.15476100  | -0.93728200 |
| C  | -3.96969800 | -0.87497800 | -1.38836700 |
| H  | -4.41166600 | -0.84680400 | -2.37585200 |
| C  | 1.45524100  | 1.81969300  | -0.93621000 |
| H  | 2.26313100  | 1.17041300  | -1.30272600 |
| C  | -3.42754900 | 1.40566000  | -2.95507300 |
| H  | -3.05100900 | 0.60634000  | -3.60449500 |
| H  | -3.08772500 | 2.37241500  | -3.32997000 |
| H  | -4.52475500 | 1.38484800  | -2.94745700 |
| C  | 1.87474400  | 0.58848900  | 1.76388800  |
| H  | 1.96167700  | 1.59583900  | 2.19588800  |
| C  | -1.41102200 | 3.73413400  | 2.38032100  |
| H  | -1.15327800 | 4.64035800  | 2.92172100  |
| C  | -4.20241800 | -1.96847000 | -0.55711600 |
| H  | -4.83017900 | -2.77853400 | -0.91574000 |
| C  | 2.08331000  | 3.14613500  | -0.46117900 |
| H  | 2.77650700  | 2.98200800  | 0.37258300  |
| H  | 1.29257700  | 3.81309300  | -0.09518700 |
| C  | -3.64075600 | -2.06077800 | 0.71252300  |
| H  | -3.82791300 | -2.93515200 | 1.32193800  |
| C  | 1.33277400  | -0.34801800 | 2.86599200  |
| H  | 0.34205000  | -0.01595900 | 3.19664900  |
| H  | 1.20140900  | -1.35321300 | 2.44342300  |
| C  | -2.41316000 | -2.12942400 | 3.24965200  |
| H  | -3.46830500 | -2.29690900 | 3.50012600  |
| H  | -1.85859200 | -1.89905200 | 4.16060800  |
| H  | -1.99842000 | -3.03107200 | 2.78377100  |
| C  | 1.88767800  | 4.09922800  | -2.80872100 |
| H  | 1.11176100  | 4.82066200  | -2.51242400 |

|   |            |             |             |
|---|------------|-------------|-------------|
| H | 2.44270200 | 4.55845400  | -3.63655100 |
| C | 2.82159900 | 3.84772400  | -1.61630800 |
| H | 3.24914400 | 4.79353900  | -1.25931200 |
| H | 3.66762200 | 3.22315900  | -1.93858500 |
| C | 3.28484300 | 0.14707800  | 1.31758500  |
| H | 3.68954700 | 0.83535200  | 0.56666900  |
| H | 3.23074700 | -0.83857800 | 0.84280300  |
| C | 1.21780000 | 2.79738800  | -3.27178900 |
| H | 1.98233100 | 2.12580800  | -3.68945600 |
| H | 0.50676700 | 3.00196900  | -4.08256500 |
| C | 2.29808900 | -0.41683100 | 4.06145100  |
| H | 2.34529000 | 0.56938200  | 4.54735900  |
| H | 1.90574200 | -1.11472000 | 4.81248600  |
| C | 3.70881300 | -0.83768000 | 3.62609100  |
| H | 4.39023900 | -0.83611500 | 4.48646400  |
| H | 3.67818500 | -1.87102800 | 3.25090200  |
| C | 4.24409300 | 0.08312800  | 2.52028200  |
| H | 5.23036100 | -0.25903500 | 2.18231800  |
| H | 4.38684400 | 1.09532700  | 2.92870200  |
| C | 3.93644800 | -2.92384300 | -1.99490200 |
| C | 3.30643500 | -1.92167700 | -2.73303300 |
| C | 2.08213700 | -1.39135100 | -2.30723800 |
| C | 1.47868600 | -1.85661100 | -1.13349200 |
| C | 2.10193600 | -2.87973300 | -0.40645200 |
| C | 3.32612800 | -3.40468200 | -0.83402000 |
| H | 4.88534600 | -3.33669400 | -2.32745000 |
| H | 3.75887700 | -1.55249400 | -3.65101800 |
| H | 1.59481700 | -0.63033400 | -2.90976500 |
| H | 1.62741800 | -3.28446100 | 0.48261500  |
| H | 3.79548600 | -4.20125100 | -0.26067900 |

**5<sub>SP</sub> [Pd(SPhos)(Ph)(Cl)] (conformer c)**

|    |             |             |             |
|----|-------------|-------------|-------------|
| Pd | 2.57912500  | 0.85857800  | 0.04273400  |
| P  | 0.27264200  | 0.67782900  | 0.18910300  |
| Cl | 4.75943000  | 1.64618700  | 0.05333300  |
| O  | -1.41169500 | -2.94501300 | -1.21559600 |
| O  | -4.05764000 | 0.85929500  | -0.52711900 |
| C  | -0.57912800 | 0.33904500  | -1.43675300 |
| C  | -1.81733400 | -0.28927800 | -1.72455000 |
| C  | -2.69489700 | -1.03755800 | -0.76377700 |
| C  | -2.49058200 | -2.41891200 | -0.56762000 |
| C  | -3.35875700 | -3.17367600 | 0.23357400  |
| H  | -3.19236300 | -4.23194100 | 0.39224300  |
| C  | -4.45633400 | -2.54622200 | 0.81873100  |
| H  | -5.13019800 | -3.12603500 | 1.44351200  |
| C  | -4.71703800 | -1.19451200 | 0.60623700  |
| H  | -5.59142600 | -0.73756900 | 1.05247100  |
| C  | -3.84838100 | -0.45177000 | -0.20665400 |
| C  | -2.27741600 | -0.29075300 | -3.05370800 |
| H  | -3.22655100 | -0.77624000 | -3.26205400 |
| C  | -1.55924000 | 0.28832500  | -4.09466600 |
| H  | -1.95207300 | 0.26305200  | -5.10746000 |
| C  | -0.32607800 | 0.87610100  | -3.82319200 |
| H  | 0.27122100  | 1.31369500  | -4.61815900 |
| C  | 0.14884000  | 0.88840600  | -2.51475100 |
| H  | 1.12454300  | 1.32534400  | -2.31803300 |
| C  | -5.23086700 | 1.49820500  | -0.04658300 |

|                                                                                                     |             |             |             |    |             |             |             |
|-----------------------------------------------------------------------------------------------------|-------------|-------------|-------------|----|-------------|-------------|-------------|
| H                                                                                                   | -6.13748500 | 0.99115900  | -0.40051700 | Cl | -0.27063800 | 4.76110100  | 1.18108900  |
| H                                                                                                   | -5.20290200 | 2.51190900  | -0.44987100 | C  | -0.58602300 | 4.00165800  | -0.37832500 |
| H                                                                                                   | -5.24700300 | 1.54513000  | 1.04996900  | C  | 0.29927600  | 3.00240400  | -0.83574600 |
| C                                                                                                   | -1.14580500 | -4.33576200 | -1.09155500 | C  | 0.06012200  | 2.42353100  | -2.10417200 |
| H                                                                                                   | -0.95945300 | -4.61814700 | -0.04787800 | C  | -1.04588800 | 2.85141700  | -2.87515300 |
| H                                                                                                   | -0.24245100 | -4.51382700 | -1.67628600 | C  | -1.88496800 | 3.85182400  | -2.39987200 |
| H                                                                                                   | -1.97208900 | -4.93741000 | -1.49125300 | C  | -1.65869400 | 4.43790500  | -1.14274900 |
| C                                                                                                   | -0.41557100 | -0.35370200 | 1.60187500  | H  | 1.21887200  | 2.80660400  | -0.29705200 |
| H                                                                                                   | -1.50525800 | -0.38751800 | 1.48473900  | H  | 0.81433600  | 1.78107800  | -2.55144500 |
| C                                                                                                   | -0.08743100 | 0.28808300  | 2.97148100  | H  | -1.21371100 | 2.41374500  | -3.85517400 |
| H                                                                                                   | 1.00277500  | 0.39279700  | 3.07064100  | H  | -2.72371400 | 4.19302200  | -3.00057100 |
| H                                                                                                   | -0.51206400 | 1.29399000  | 3.05035100  | H  | -2.30654500 | 5.22517700  | -0.77179400 |
| C                                                                                                   | -0.62965900 | -0.56605900 | 4.13256800  | C  | 6.62903700  | 1.38699800  | 1.11432300  |
| H                                                                                                   | -0.35440600 | -0.09666500 | 5.08560700  | C  | 5.51544600  | 0.35669500  | 0.85107700  |
| H                                                                                                   | -1.72904300 | -0.56817400 | 4.09037000  | C  | 4.18828200  | 1.04690000  | 0.47784200  |
| C                                                                                                   | -0.11956500 | -2.01147700 | 4.07814800  | C  | 3.77350400  | 2.03692600  | 1.59177900  |
| H                                                                                                   | 0.96721600  | -2.01948400 | 4.24635500  | C  | 4.88319900  | 3.06862400  | 1.86120600  |
| H                                                                                                   | -0.56733900 | -2.60203100 | 4.88763700  | C  | 6.21925800  | 2.39161900  | 2.20172400  |
| C                                                                                                   | -0.42488200 | -2.64517100 | 2.71450000  | H  | 6.84770300  | 1.92887000  | 0.18205400  |
| H                                                                                                   | -1.51207000 | -2.75459800 | 2.59454200  | H  | 7.55573000  | 0.87184500  | 1.40007500  |
| H                                                                                                   | 0.00183800  | -3.65550100 | 2.66206900  | H  | 5.37226100  | -0.24281000 | 1.75973800  |
| C                                                                                                   | 0.13943300  | -1.79439000 | 1.56440300  | H  | 5.83030000  | -0.33752600 | 0.06277000  |
| H                                                                                                   | -0.07151600 | -2.26216000 | 0.60037700  | H  | 4.38881800  | 1.66872100  | -0.40890600 |
| H                                                                                                   | 1.23055800  | -1.75378600 | 1.65361500  | H  | 2.84395200  | 2.55115400  | 1.31970800  |
| C                                                                                                   | -0.21926400 | 2.45715700  | 0.61015500  | H  | 3.56305700  | 1.49065700  | 2.52061400  |
| H                                                                                                   | 0.28254700  | 2.62272200  | 1.57440700  | H  | 5.01287900  | 3.69818400  | 0.96820600  |
| C                                                                                                   | 0.36565300  | 3.48783600  | -0.38095400 | H  | 4.57847300  | 3.74043000  | 2.67395600  |
| H                                                                                                   | 1.45016900  | 3.35029300  | -0.49228800 | H  | 6.12118700  | 1.86243000  | 3.16157400  |
| H                                                                                                   | -0.07465700 | 3.33155700  | -1.37421500 | H  | 7.00480400  | 3.14562300  | 2.34057100  |
| C                                                                                                   | 0.07446700  | 4.92635700  | 0.08018800  | C  | 1.76033700  | -2.26067900 | 3.31670500  |
| H                                                                                                   | 0.60476300  | 5.11799200  | 1.02445900  | C  | 2.18895900  | -1.06491700 | 2.44902900  |
| H                                                                                                   | 0.47851800  | 5.63426700  | -0.65392300 | C  | 2.53406400  | -1.50289300 | 1.00935700  |
| C                                                                                                   | -1.42898700 | 5.16158900  | 0.28212600  | C  | 3.62274500  | -2.59784100 | 1.03107200  |
| H                                                                                                   | -1.94128000 | 5.08429800  | -0.68834900 | C  | 3.18937000  | -3.79635100 | 1.89679100  |
| H                                                                                                   | -1.60914500 | 6.17886200  | 0.65197500  | C  | 2.82729400  | -3.36503000 | 3.32506500  |
| C                                                                                                   | -2.02267100 | 4.12952400  | 1.25101900  | H  | 0.81740600  | -2.67042400 | 2.92456100  |
| H                                                                                                   | -1.59946200 | 4.28872400  | 2.25411900  | H  | 1.55212300  | -1.92355600 | 4.34079200  |
| H                                                                                                   | -3.10720100 | 4.27284500  | 1.34576000  | H  | 3.06831800  | -0.59493300 | 2.91005200  |
| C                                                                                                   | -1.72997700 | 2.68725100  | 0.79836600  | H  | 1.39611100  | -0.30696200 | 2.43270600  |
| H                                                                                                   | -2.24426700 | 2.48297600  | -0.14707500 | H  | 1.62069500  | -1.96377800 | 0.60364400  |
| H                                                                                                   | -2.14158200 | 1.98153700  | 1.52964700  | H  | 3.84590800  | -2.94767000 | 0.01679000  |
| C                                                                                                   | 3.64247700  | -3.69736900 | -0.92108500 | H  | 4.55852500  | -2.19058600 | 1.43238700  |
| C                                                                                                   | 4.09037000  | -3.07836900 | 0.24808300  | H  | 2.31696400  | -4.28050500 | 1.43259800  |
| C                                                                                                   | 3.74664300  | -1.75119200 | 0.52651400  | H  | 3.98856100  | -4.54902300 | 1.91661100  |
| C                                                                                                   | 2.93313300  | -1.04568100 | -0.36919100 | H  | 3.73076300  | -2.98952800 | 3.82871500  |
| C                                                                                                   | 2.48697700  | -1.65386600 | -1.54398400 | H  | 2.48063800  | -4.22783600 | 3.90843300  |
| C                                                                                                   | 2.84834200  | -2.98017100 | -1.81626500 | C  | 4.37005400  | -0.36717000 | -4.05260500 |
| H                                                                                                   | 3.92142900  | -4.72536800 | -1.13750500 | C  | 3.85923300  | 0.26919000  | -2.74807100 |
| H                                                                                                   | 4.72594700  | -3.61960100 | 0.94506400  | C  | 3.45373600  | -0.79365200 | -1.70279600 |
| H                                                                                                   | 4.12775400  | -1.27011800 | 1.42112100  | C  | 2.42893400  | -1.77116400 | -2.32224200 |
| H                                                                                                   | 1.86343300  | -1.11685200 | -2.25003300 | C  | 2.93975800  | -2.40608000 | -3.62677200 |
| H                                                                                                   | 2.50671500  | -3.44348900 | -2.73946600 | C  | 3.34641300  | -1.33969400 | -4.65247100 |
|                                                                                                     |             |             |             | H  | 5.30544600  | -0.90854300 | -3.84660100 |
|                                                                                                     |             |             |             | H  | 4.61916900  | 0.42079500  | -4.77525300 |
|                                                                                                     |             |             |             | H  | 2.99129400  | 0.90684200  | -2.97424500 |
|                                                                                                     |             |             |             | H  | 4.63471700  | 0.93176000  | -2.34767200 |
|                                                                                                     |             |             |             | H  | 4.35723800  | -1.36415800 | -1.44178600 |
| <b>6<sub>Cy</sub><sup>‡</sup> [Pd(PCy<sub>3</sub>)<sub>2</sub>(PhCl)]<sup>‡</sup> (conformer F)</b> |             |             |             |    |             |             |             |
| Pd                                                                                                  | -0.64090700 | 0.85645400  | -0.56379700 |    |             |             |             |
| P                                                                                                   | 2.72568800  | -0.00096000 | -0.13849700 |    |             |             |             |
| P                                                                                                   | -2.35204600 | -0.56532700 | 0.05642700  |    |             |             |             |

|   |             |             |             |
|---|-------------|-------------|-------------|
| H | 2.17446200  | -2.56402300 | -1.60896800 |
| H | 1.49428500  | -1.22734200 | -2.52291100 |
| H | 3.80762100  | -3.04500600 | -3.40460300 |
| H | 2.16730300  | -3.06506200 | -4.04510200 |
| H | 2.45307100  | -0.77882500 | -4.96624900 |
| H | 3.75235700  | -1.81176800 | -5.55642400 |
| C | -3.33410900 | -2.17990300 | 3.93171400  |
| C | -3.57749900 | -1.78194800 | 2.46402000  |
| C | -2.39752000 | -0.95791400 | 1.90958200  |
| C | -2.16005800 | 0.29180100  | 2.78629800  |
| C | -1.92200100 | -0.09783200 | 4.25545200  |
| C | -3.07235700 | -0.94969200 | 4.81309300  |
| H | -2.46791000 | -2.85645800 | 3.98354500  |
| H | -4.19467900 | -2.74590700 | 4.31202200  |
| H | -4.49769600 | -1.18592800 | 2.41146800  |
| H | -3.75000100 | -2.68119900 | 1.86023100  |
| H | -1.49172700 | -1.57466800 | 2.01397600  |
| H | -1.30787200 | 0.86172700  | 2.39699700  |
| H | -3.03110700 | 0.95827900  | 2.73177500  |
| H | -0.98253700 | -0.66575100 | 4.33035000  |
| H | -1.78918300 | 0.80659600  | 4.86321000  |
| H | -3.98607500 | -0.33809700 | 4.85694400  |
| H | -2.85481100 | -1.25910200 | 5.84358900  |
| C | -5.45989500 | 2.26348500  | -0.53912200 |
| C | -4.27560000 | 1.55633300  | 0.14098900  |
| C | -4.01843000 | 0.16982400  | -0.48677500 |
| C | -5.29434100 | -0.69610300 | -0.40664200 |
| C | -6.48091900 | 0.01000800  | -1.09059500 |
| C | -6.73214400 | 1.40445600  | -0.49839100 |
| H | -5.19641000 | 2.47634900  | -1.58589700 |
| H | -5.64079300 | 3.23386800  | -0.05846000 |
| H | -4.50201100 | 1.44114500  | 1.21014000  |
| H | -3.37140300 | 2.17133800  | 0.06793900  |
| H | -3.81800800 | 0.35139700  | -1.55366500 |
| H | -5.13814800 | -1.67531000 | -0.87353700 |
| H | -5.55420700 | -0.88749800 | 0.64144000  |
| H | -6.27107200 | 0.10577500  | -2.16652900 |
| H | -7.38266200 | -0.61034400 | -1.00316700 |
| H | -7.06216200 | 1.29837000  | 0.54607800  |
| H | -7.55006600 | 1.90360400  | -1.03417400 |
| C | -1.23023700 | -4.53762800 | -0.99061500 |
| C | -1.20885800 | -3.15568800 | -0.31452400 |
| C | -2.41616000 | -2.28833400 | -0.72764300 |
| C | -2.48515300 | -2.18329400 | -2.26752700 |
| C | -2.50733900 | -3.56532300 | -2.94257200 |
| C | -1.30693700 | -4.42184500 | -2.51879300 |
| H | -2.09922000 | -5.10606900 | -0.62673400 |
| H | -0.33985500 | -5.10778000 | -0.69398000 |
| H | -0.28538500 | -2.62749000 | -0.59000000 |
| H | -1.18154100 | -3.29026100 | 0.77317900  |
| H | -3.32919800 | -2.79137400 | -0.37755300 |
| H | -3.36927600 | -1.61384900 | -2.57674700 |
| H | -1.61177700 | -1.61523300 | -2.61891600 |
| H | -3.43762400 | -4.08769700 | -2.67300900 |
| H | -2.52425900 | -3.44328600 | -4.03352400 |
| H | -0.38167900 | -3.95903400 | -2.89370100 |
| H | -1.36648500 | -5.41819100 | -2.97559100 |

**6<sub>H</sub><sup>†</sup> [Pd(PH<sub>3</sub>)<sub>2</sub>(PhBr)]<sup>‡</sup> Fixed Pd—P = 3.3**

|    |             |             |             |
|----|-------------|-------------|-------------|
| Pd | 1.08413200  | 0.29863800  | 0.05538400  |
| Br | -3.47402700 | 0.57083600  | -0.42658200 |
| P  | 1.86453800  | 2.30339800  | 0.69982700  |
| P  | 4.05123900  | -0.95617300 | -0.75359600 |
| C  | -2.01000500 | -0.59405900 | 0.00042000  |
| C  | -0.94843700 | -0.71024200 | -0.91383400 |
| C  | 0.11020000  | -1.60544300 | -0.61779400 |
| C  | 0.10888100  | -2.30167500 | 0.61457400  |
| C  | -0.95732000 | -2.15647500 | 1.49964200  |
| C  | -2.03632900 | -1.31554200 | 1.18805800  |
| H  | -1.00844300 | -0.22707200 | -1.88240500 |
| H  | 0.83427100  | -1.86105400 | -1.38761100 |
| H  | 0.92299400  | -2.98298600 | 0.84162600  |
| H  | -0.96659300 | -2.70782300 | 2.43563700  |
| H  | -2.87443900 | -1.21888100 | 1.86963200  |
| H  | 3.21371800  | 2.69545500  | 0.48555500  |
| H  | 1.29343700  | 3.49385300  | 0.18044600  |
| H  | 1.82099800  | 2.70717000  | 2.06001500  |
| H  | 5.32220200  | -1.51856000 | -1.09444300 |
| H  | 4.31124900  | 0.25921200  | -1.44294600 |
| H  | 4.51286700  | -0.46365400 | 0.49735400  |

**6<sub>H</sub><sup>†</sup> [Pd(PH<sub>3</sub>)<sub>2</sub>(PhCl)]<sup>‡</sup>**

|    |             |             |             |
|----|-------------|-------------|-------------|
| Pd | 0.67195700  | 0.27920800  | 0.06661600  |
| P  | 1.63858900  | 2.22507900  | 0.63185800  |
| Cl | -3.62832300 | 0.97191900  | -0.85482100 |
| C  | -2.49375100 | -0.21286900 | -0.22264200 |
| C  | -1.37838600 | -0.56792400 | -1.00230500 |
| C  | -0.48984900 | -1.55645300 | -0.51229600 |
| C  | -0.70498300 | -2.11033200 | 0.77263700  |
| C  | -1.81799300 | -1.73172500 | 1.52035700  |
| C  | -2.73161100 | -0.79419400 | 1.01754200  |
| H  | -1.28469300 | -0.18750700 | -2.01332900 |
| H  | 0.25953700  | -1.98582500 | -1.17219600 |
| H  | -0.02151800 | -2.86541300 | 1.14866200  |
| H  | -1.99258600 | -2.17339600 | 2.49734700  |
| H  | -3.60927300 | -0.51228300 | 1.58938300  |
| P  | 3.47771800  | -1.26201800 | -0.67380900 |
| H  | 2.98451000  | 2.52797400  | 0.28982100  |
| H  | 1.10097200  | 3.45248300  | 0.16541900  |
| H  | 1.75119500  | 2.62788300  | 1.98869900  |
| H  | 4.68129000  | -1.97084300 | -0.98714200 |
| H  | 3.86713400  | -0.10978300 | -1.40883600 |
| H  | 3.98972100  | -0.77442800 | 0.55927500  |

**6<sub>Ph</sub><sup>†</sup> [Pd(PH<sub>3</sub>)<sub>2</sub>(PhBr)]<sup>‡</sup>**

|    |             |             |             |
|----|-------------|-------------|-------------|
| Pd | 0.54913800  | -0.53292000 | -0.85134400 |
| Br | 2.32155300  | -4.16964500 | 1.02010800  |
| P  | 1.97635700  | 1.11434600  | -0.14120600 |
| P  | -2.79802300 | -0.03359400 | -0.15032200 |
| C  | 1.60766300  | -3.49190800 | -0.63209100 |
| C  | 0.33915200  | -2.87717700 | -0.61562300 |
| C  | -0.21049700 | -2.42592900 | -1.84411600 |
| C  | 0.55569900  | -2.54074400 | -3.02986800 |
| C  | 1.80553700  | -3.15023000 | -3.00405600 |

|   |             |             |             |
|---|-------------|-------------|-------------|
| C | 2.33560200  | -3.65012100 | -1.80233700 |
| H | -0.26641700 | -2.91533300 | 0.28394300  |
| H | -1.26169800 | -2.16013200 | -1.90323400 |
| H | 0.13557800  | -2.19320000 | -3.96936100 |
| H | 2.37782500  | -3.25943800 | -3.92137300 |
| H | 3.30271600  | -4.14053100 | -1.78671300 |
| C | -2.87524700 | -0.22385800 | 1.68737100  |
| C | -1.67758200 | -0.05519300 | 2.40115600  |
| C | -4.04719500 | -0.53907200 | 2.39583700  |
| C | -1.65386100 | -0.17926900 | 3.79219000  |
| H | -0.75819100 | 0.16027000  | 1.86177300  |
| C | -4.02075300 | -0.67018100 | 3.78510100  |
| H | -4.97967800 | -0.68966800 | 1.85934200  |
| C | -2.82529900 | -0.48741500 | 4.48576200  |
| H | -0.71682700 | -0.04189000 | 4.32466800  |
| H | -4.93412100 | -0.91674600 | 4.32071700  |
| H | -2.80773400 | -0.59193900 | 5.56760400  |
| C | -3.47015000 | 1.66664000  | -0.44649400 |
| C | -3.32435100 | 2.19649300  | -1.74148200 |
| C | -4.07433900 | 2.46329700  | 0.53836100  |
| C | -3.79565200 | 3.47351700  | -2.05035900 |
| H | -2.83664200 | 1.60457900  | -2.51298300 |
| C | -4.52967600 | 3.74821000  | 0.23358400  |
| H | -4.18920300 | 2.08079100  | 1.54757000  |
| C | -4.39819800 | 4.25481500  | -1.06061700 |
| H | -3.68386100 | 3.86020400  | -3.06008100 |
| H | -4.99220700 | 4.35218100  | 1.01008200  |
| H | -4.75823800 | 5.25287500  | -1.29612400 |
| C | -4.19143900 | -1.12396400 | -0.70968700 |
| C | -4.00295000 | -2.51466500 | -0.60088600 |
| C | -5.37814200 | -0.65709800 | -1.29458600 |
| C | -4.97451800 | -3.40807100 | -1.04976000 |
| H | -3.09226500 | -2.90301400 | -0.14973300 |
| C | -6.34760600 | -1.55342800 | -1.75306600 |
| H | -5.55071300 | 0.40996600  | -1.39193200 |
| C | -6.15130000 | -2.92931000 | -1.63174000 |
| H | -4.81003500 | -4.47782400 | -0.94980900 |
| H | -7.26110800 | -1.17101100 | -2.20164700 |
| H | -6.90689300 | -3.62405800 | -1.98857300 |
| C | 1.65398800  | 2.84200300  | -0.73275400 |
| C | 0.31710500  | 3.22442900  | -0.92858100 |
| C | 2.66751400  | 3.77802700  | -0.99325800 |
| C | -0.00169300 | 4.51455800  | -1.35478700 |
| H | -0.47587000 | 2.50217200  | -0.75445400 |
| C | 2.34865300  | 5.06545200  | -1.43067200 |
| H | 3.70919100  | 3.50228800  | -0.86115800 |
| C | 1.01465300  | 5.43788400  | -1.60866100 |
| H | -1.04353900 | 4.78856900  | -1.49613700 |
| H | 3.14534300  | 5.77689900  | -1.63316400 |
| H | 0.76958800  | 6.44052600  | -1.94971100 |
| C | 2.12277500  | 1.31732100  | 1.69714800  |
| C | 2.08987000  | 2.55794600  | 2.34994000  |
| C | 2.25795600  | 0.15026900  | 2.47034100  |
| C | 2.19278500  | 2.63080500  | 3.74246900  |
| H | 1.98442900  | 3.47129200  | 1.77314500  |
| C | 2.37546100  | 0.22577400  | 3.85803200  |
| H | 2.26964500  | -0.82007900 | 1.97963500  |

|   |            |             |             |
|---|------------|-------------|-------------|
| C | 2.33953500 | 1.46814600  | 4.49946800  |
| H | 2.16124600 | 3.60050200  | 4.23280800  |
| H | 2.48954300 | -0.68629900 | 4.43842600  |
| H | 2.42393400 | 1.52737500  | 5.58150000  |
| C | 3.74140100 | 0.83421200  | -0.63817900 |
| C | 3.98867200 | 0.18691700  | -1.85930900 |
| C | 4.83452900 | 1.24022700  | 0.14343400  |
| C | 5.29540600 | -0.03217000 | -2.29705600 |
| H | 3.14727300 | -0.15911900 | -2.45462900 |
| C | 6.14228800 | 1.01130200  | -0.29095200 |
| H | 4.66705400 | 1.73005100  | 1.09818400  |
| C | 6.37600700 | 0.37822200  | -1.51299600 |
| H | 5.46929500 | -0.53496800 | -3.24502600 |
| H | 6.97797500 | 1.32700300  | 0.32849700  |
| H | 7.39411000 | 0.19834100  | -1.84840700 |

|    | <b>6Ph<sup>†</sup> [Pd(PPh<sub>3</sub>)<sub>2</sub>(PhCl)]<sup>†</sup></b> |             |             |
|----|----------------------------------------------------------------------------|-------------|-------------|
| Pd | -0.64020600                                                                | 0.94610000  | -0.58089500 |
| P  | -2.15279900                                                                | -0.70760200 | -0.11538000 |
| Cl | -2.36076300                                                                | 4.34280200  | 1.50545500  |
| C  | -1.58879300                                                                | 3.90223900  | -0.01581500 |
| C  | -0.35822400                                                                | 3.21428900  | 0.02618200  |
| C  | 0.29436400                                                                 | 2.91201900  | -1.19716700 |
| C  | -0.34189900                                                                | 3.23967300  | -2.42032700 |
| C  | -1.56016700                                                                | 3.91048200  | -2.42187500 |
| C  | -2.18482100                                                                | 4.26625300  | -1.21445100 |
| H  | 0.15215400                                                                 | 3.09444500  | 0.97640100  |
| H  | 1.33504800                                                                 | 2.60225900  | -1.19497900 |
| H  | 0.15525200                                                                 | 3.00647200  | -3.35755600 |
| H  | -2.03106600                                                                | 4.18152300  | -3.36295200 |
| H  | -3.12439300                                                                | 4.80828900  | -1.21252700 |
| P  | 2.69230300                                                                 | 0.01341300  | -0.08720200 |
| C  | 2.90043400                                                                 | -0.29578000 | 1.72409900  |
| C  | 1.74246900                                                                 | -0.57958900 | 2.46601800  |
| C  | 4.13678100                                                                 | -0.24832800 | 2.39073200  |
| C  | 1.81928300                                                                 | -0.83075000 | 3.83795200  |
| H  | 0.77538500                                                                 | -0.58998100 | 1.96979100  |
| C  | 4.21170900                                                                 | -0.49343700 | 3.76253500  |
| H  | 5.04042300                                                                 | -0.01155000 | 1.83630800  |
| C  | 3.05382900                                                                 | -0.78861000 | 4.48763700  |
| H  | 0.91097000                                                                 | -1.04908200 | 4.39267000  |
| H  | 5.17436000                                                                 | -0.45210400 | 4.26603600  |
| H  | 3.11499500                                                                 | -0.97701800 | 5.55645900  |
| C  | 3.24710000                                                                 | -1.57041100 | -0.87305100 |
| C  | 2.94006600                                                                 | -1.74857000 | -2.23403700 |
| C  | 3.91461100                                                                 | -2.60341300 | -0.19681800 |
| C  | 3.31364600                                                                 | -2.91355200 | -2.90647700 |
| H  | 2.40154600                                                                 | -0.96974600 | -2.76939900 |
| C  | 4.27387900                                                                 | -3.77582400 | -0.86548300 |
| H  | 4.15312100                                                                 | -2.49482300 | 0.85647700  |
| C  | 3.98026900                                                                 | -3.93274900 | -2.22147700 |
| H  | 3.07577700                                                                 | -3.02769900 | -3.96093900 |
| H  | 4.78748500                                                                 | -4.56670400 | -0.32473900 |
| H  | 4.26467600                                                                 | -4.84445500 | -2.74027200 |
| C  | 4.10628500                                                                 | 1.16090000  | -0.44366400 |
| C  | 4.02822700                                                                 | 2.46334300  | 0.08494000  |
| C  | 5.19644800                                                                 | 0.84079800  | -1.26673700 |

|                                                                                            |             |             |             |   |           |           |           |
|--------------------------------------------------------------------------------------------|-------------|-------------|-------------|---|-----------|-----------|-----------|
| C                                                                                          | 5.01520700  | 3.40918500  | -0.18874000 | C | -7.137773 | -1.507313 | -0.710589 |
| H                                                                                          | 3.19371600  | 2.73591100  | 0.72763500  | C | -6.258815 | -0.655272 | -1.369204 |
| C                                                                                          | 6.18062300  | 1.79244300  | -1.54807300 | C | 3.224773  | 2.897631  | -0.390871 |
| H                                                                                          | 5.28275300  | -0.15539700 | -1.68870200 | C | 3.184722  | -0.951179 | 1.469083  |
| C                                                                                          | 6.09553000  | 3.07699700  | -1.01056200 | C | 1.131917  | 0.370728  | -3.367438 |
| H                                                                                          | 4.93789700  | 4.40684200  | 0.23566900  | C | -4.323667 | 1.815142  | -1.602929 |
| H                                                                                          | 7.01868600  | 1.52352000  | -2.18626700 | C | 5.826740  | -0.343467 | -1.235567 |
| H                                                                                          | 6.86236600  | 3.81483100  | -1.23073500 | C | 3.292773  | -0.674568 | -3.413380 |
| C                                                                                          | -1.98211000 | -2.30181800 | -1.04709000 | C | 3.408467  | -0.611993 | 2.958676  |
| C                                                                                          | -0.68574800 | -2.72353800 | -1.38385900 | C | -3.423642 | 0.066866  | -2.999006 |
| C                                                                                          | -3.07110700 | -3.09915900 | -1.43364700 | C | -3.789767 | 2.787066  | -2.460699 |
| C                                                                                          | -0.47942400 | -3.91989400 | -2.07214400 | C | 2.847100  | 2.676022  | 2.087795  |
| H                                                                                          | 0.16438500  | -2.10329500 | -1.11312400 | C | 2.366304  | 0.009920  | -1.267138 |
| C                                                                                          | -2.86515400 | -4.29132000 | -2.13140000 | C | 2.174530  | -0.199519 | -4.093418 |
| H                                                                                          | -4.08374200 | -2.78751800 | -1.19707400 | C | -2.564844 | -4.270630 | -0.189709 |
| C                                                                                          | -1.57019400 | -4.70624500 | -2.44890000 | C | -3.059255 | 2.379453  | -3.574660 |
| H                                                                                          | 0.53295900  | -4.22641300 | -2.32062400 | C | 2.467581  | -2.309513 | 1.337918  |
| H                                                                                          | -3.71943000 | -4.89467900 | -2.42815900 | C | -2.869110 | 1.029168  | -3.856196 |
| H                                                                                          | -1.41317000 | -5.63402400 | -2.99315800 | C | 3.279115  | 1.926901  | 0.805969  |
| C                                                                                          | -2.23506300 | -1.25978500 | 1.65429200  | C | -3.392143 | -1.225187 | 3.250887  |
| C                                                                                          | -2.28021700 | -2.60438200 | 2.05042000  | C | -2.215558 | -5.321764 | -1.260959 |
| C                                                                                          | -2.22815000 | -0.26310000 | 2.64662900  | C | 1.233400  | 0.454738  | -1.979844 |
| C                                                                                          | -2.31974500 | -2.94461100 | 3.40596400  | C | -2.666959 | -2.168342 | 2.266914  |
| H                                                                                          | -2.28331800 | -3.39049400 | 1.30194100  | C | 3.881970  | -4.715685 | -1.632268 |
| C                                                                                          | -2.28244900 | -0.60365500 | 3.99800500  | C | 7.040237  | -0.892233 | -0.795095 |
| H                                                                                          | -2.17625200 | 0.78308000  | 2.35418000  | C | -2.706806 | -1.717106 | -4.427740 |
| C                                                                                          | -2.32482000 | -1.94777000 | 4.38222600  | C | -5.307233 | -2.222519 | 0.677198  |
| H                                                                                          | -2.34945300 | -3.99192500 | 3.69580700  | C | 6.812133  | 1.822717  | -1.478637 |
| H                                                                                          | -2.28464100 | 0.18039900  | 4.75090000  | C | 4.079541  | 4.154206  | -0.141370 |
| H                                                                                          | -2.36030300 | -2.21429500 | 5.43541900  | C | -2.055346 | -2.873378 | -0.596048 |
| C                                                                                          | -3.91037600 | -0.22317400 | -0.45551300 | C | 3.696724  | 4.878072  | 1.156601  |
| C                                                                                          | -4.15164300 | 0.66480700  | -1.51581600 | C | -1.323348 | -3.094356 | 4.225593  |
| C                                                                                          | -5.00176600 | -0.70266800 | 0.28541100  | C | -1.260022 | -2.492270 | 2.810874  |
| C                                                                                          | -5.45335100 | 1.04806800  | -1.84074200 | C | -3.466067 | -1.822869 | 4.666239  |
| H                                                                                          | -3.30722000 | 1.06466300  | -2.07197100 | C | 3.722504  | 3.913644  | 2.349526  |
| C                                                                                          | -6.30367900 | -0.30906200 | -0.03329000 | C | -0.710140 | -5.348285 | -1.565090 |
| H                                                                                          | -4.83720700 | -1.38041000 | 1.11791600  | C | 6.060621  | -3.108123 | -0.893403 |
| C                                                                                          | -6.53289500 | 0.56343000  | -1.09879200 | C | -0.199129 | -3.951822 | -1.949208 |
| H                                                                                          | -5.62317200 | 1.73574900  | -2.66529900 | C | -0.542222 | -2.908958 | -0.872412 |
| H                                                                                          | -7.13820600 | -0.68462000 | 0.55348200  | C | 3.206662  | -3.435681 | 2.079879  |
| H                                                                                          | -7.54631000 | 0.87045300  | -1.34400200 | C | -5.442493 | 3.473893  | -0.280752 |
| <b>6<sub>SP</sub><sup>+</sup> [Pd(SPhos)<sub>2</sub>(PhBr)]<sup>+</sup> (conformer ac)</b> |             |             |             | C | 7.138607  | -2.269570 | -0.621378 |
| Pd                                                                                         | -1.233952   | 0.481671    | 0.642833    | C | 4.139731  | -1.745294 | 3.701743  |
| P                                                                                          | 2.184288    | 0.382964    | 0.564559    | C | -2.071882 | -2.176871 | 5.202383  |
| P                                                                                          | -2.569392   | -1.416404   | 0.526710    | C | 3.417633  | -3.090879 | 3.559765  |
| O                                                                                          | -3.357300   | -1.275955   | -3.246022   | C | -2.377045 | 2.355946  | 1.586009  |
| O                                                                                          | 3.757403    | -3.301835   | -1.653727   | C | -1.790450 | 3.120051  | 0.549456  |
| O                                                                                          | 5.663548    | 0.989003    | -1.486901   | C | -1.969863 | 2.587505  | 2.919847  |
| C                                                                                          | 4.851352    | -2.547610   | -1.329619   | C | -0.864623 | 4.114250  | 0.881768  |
| O                                                                                          | -5.064550   | 2.121040    | -0.495064   | C | -1.023758 | 3.563474  | 3.211341  |
| C                                                                                          | -4.132340   | 0.439014    | -1.841216   | C | -0.474360 | 4.359268  | 2.193402  |
| C                                                                                          | -4.897725   | -0.562551   | -1.024425   | H | -7.313625 | -2.973407 | 0.866435  |
| C                                                                                          | -4.392190   | -1.369081   | 0.026373    | H | -8.183274 | -1.549586 | -1.004515 |
| C                                                                                          | 3.419991    | -0.579782   | -2.016302   | H | -6.624991 | -0.028599 | -2.177765 |
| C                                                                                          | -6.653954   | -2.297117   | 0.328496    | H | 3.569084  | 2.397452  | -1.298885 |
| C                                                                                          | 4.696586    | -1.152053   | -1.466631   | H | 2.184031  | 3.201764  | -0.566758 |
|                                                                                            |             |             |             | H | 4.170977  | -1.027019 | 0.997716  |

|   |           |           |           |
|---|-----------|-----------|-----------|
| H | 0.239778  | 0.744108  | -3.862991 |
| H | 4.105002  | -1.132278 | -3.971893 |
| H | 3.998878  | 0.304471  | 3.056839  |
| H | 2.440650  | -0.421151 | 3.446400  |
| H | -3.936815 | 3.842922  | -2.269130 |
| H | 1.802572  | 2.989550  | 1.972481  |
| H | 2.869418  | 2.019758  | 2.962952  |
| H | 2.121445  | -0.281458 | -5.176302 |
| H | -3.649607 | -4.257599 | -0.033408 |
| H | -2.106563 | -4.575293 | 0.762057  |
| H | -2.640189 | 3.128846  | -4.240532 |
| H | 2.355443  | -2.574731 | 0.282933  |
| H | 1.455004  | -2.211416 | 1.750434  |
| H | -2.322720 | 0.735829  | -4.743892 |
| H | 4.318921  | 1.585987  | 0.921179  |
| H | -2.839141 | -0.277149 | 3.285287  |
| H | -4.400420 | -0.988041 | 2.893911  |
| H | -2.557644 | -6.313457 | -0.935652 |
| H | -2.767434 | -5.089074 | -2.183831 |
| H | 0.396002  | 0.868921  | -1.418223 |
| H | -3.217769 | -3.116410 | 2.218638  |
| H | 4.676655  | -5.058438 | -2.307569 |
| H | 2.922003  | -5.103749 | -1.976190 |
| H | 4.079714  | -5.089929 | -0.619820 |
| H | 7.898386  | -0.261101 | -0.599993 |
| H | -3.188403 | -1.308824 | -5.325802 |
| H | -2.802262 | -2.804413 | -4.430554 |
| H | -1.643121 | -1.447284 | -4.428599 |
| H | -4.967793 | -2.857488 | 1.485728  |
| H | 7.239292  | 1.918679  | -0.471773 |
| H | 6.470759  | 2.802202  | -1.815863 |
| H | 7.583012  | 1.446897  | -2.163703 |
| H | 5.138957  | 3.862248  | -0.084765 |
| H | 3.988982  | 4.836732  | -0.997250 |
| H | -2.548333 | -2.603835 | -1.537904 |
| H | 4.370418  | 5.727344  | 1.333291  |
| H | 2.685477  | 5.294401  | 1.050270  |
| H | -1.831378 | -4.069891 | 4.183789  |
| H | -0.305662 | -3.289406 | 4.589621  |
| H | -0.739710 | -3.186808 | 2.142323  |
| H | -0.665615 | -1.568490 | 2.825631  |
| H | -3.967221 | -1.117038 | 5.341883  |
| H | -4.088973 | -2.730105 | 4.647143  |
| H | 3.382323  | 4.423333  | 3.261215  |
| H | 4.758743  | 3.594639  | 2.540622  |
| H | -0.168878 | -5.697660 | -0.672503 |
| H | -0.496780 | -6.072045 | -2.363353 |
| H | 6.167199  | -4.178773 | -0.771739 |
| H | -0.656100 | -3.651177 | -2.904026 |
| H | 0.885204  | -3.963142 | -2.116530 |
| H | 0.002572  | -3.158548 | 0.046560  |
| H | -0.191738 | -1.917271 | -1.175896 |
| H | 2.645041  | -4.375014 | 1.982745  |
| H | 4.185565  | -3.601453 | 1.606259  |
| H | -4.572469 | 4.109809  | -0.077215 |
| H | -6.091478 | 3.463350  | 0.596726  |
| H | -5.996072 | 3.874749  | -1.139742 |

|    |           |           |           |
|----|-----------|-----------|-----------|
| H  | 8.076002  | -2.699293 | -0.278633 |
| H  | 5.157559  | -1.839762 | 3.294888  |
| H  | 4.250451  | -1.478398 | 4.761179  |
| H  | -1.493481 | -1.251245 | 5.342142  |
| H  | -2.148955 | -2.650468 | 6.189841  |
| H  | 2.440183  | -3.034671 | 4.062464  |
| H  | 3.984677  | -3.883966 | 4.064933  |
| H  | -3.277415 | 1.787705  | 1.380455  |
| H  | -2.133631 | 3.013835  | -0.472236 |
| H  | -2.430292 | 2.022030  | 3.724687  |
| H  | -0.724457 | 3.741707  | 4.241052  |
| H  | 0.230576  | 5.149909  | 2.425103  |
| Br | -0.184175 | 5.241911  | -0.526034 |

**6<sub>SP</sub><sup>+</sup> [Pd(SPhos)<sub>2</sub>(PhCl)]<sup>+</sup> (conformer ac)**

|    |             |             |             |
|----|-------------|-------------|-------------|
| Pd | -1.24086300 | 0.70259400  | 0.56276900  |
| P  | 2.17030400  | 0.58473400  | 0.50061900  |
| P  | -2.58369000 | -1.19073300 | 0.56105600  |
| Cl | -0.13162400 | 5.23723200  | -0.66763300 |
| O  | -3.32506900 | -1.28217700 | -3.21494800 |
| O  | 3.75158600  | -3.24748200 | -1.47406900 |
| O  | 5.66631000  | 1.04160600  | -1.53493500 |
| C  | 4.84265100  | -2.47778200 | -1.17822000 |
| O  | -5.00565300 | 2.31175400  | -0.70805900 |
| C  | -4.08813100 | 0.53177900  | -1.93251900 |
| C  | -4.88198100 | -0.40016900 | -1.06227800 |
| C  | -4.40166500 | -1.14263400 | 0.04623700  |
| C  | 3.42504400  | -0.55284900 | -1.99902100 |
| C  | -6.68361000 | -2.00372300 | 0.38865600  |
| C  | 4.69344100  | -1.09244500 | -1.39982200 |
| C  | -7.14239000 | -1.27899200 | -0.70765300 |
| C  | -6.24109000 | -0.49092000 | -1.41437200 |
| C  | 3.21698400  | 3.02938600  | -0.60678000 |
| C  | 3.14709300  | -0.70025000 | 1.49680700  |
| C  | 1.15261700  | 0.31194700  | -3.43141400 |
| C  | -4.25393500 | 1.92374000  | -1.78236000 |
| C  | 5.82229200  | -0.27365800 | -1.20149200 |
| C  | 3.31025600  | -0.73994500 | -3.38784100 |
| C  | 3.34206900  | -0.28447300 | 2.97104200  |
| C  | -3.36892900 | 0.07437000  | -3.05255700 |
| C  | -3.68448900 | 2.83026000  | -2.68747400 |
| C  | 2.84605800  | 2.95914700  | 1.88378300  |
| C  | 2.36634700  | 0.08830800  | -1.30053000 |
| C  | 2.19983200  | -0.30797700 | -4.10821200 |
| C  | -2.62892600 | -4.08436600 | 0.04102700  |
| C  | -2.94583800 | 2.33976000  | -3.76187400 |
| C  | 2.42437700  | -2.05991500 | 1.42076400  |
| C  | -2.78160800 | 0.97114500  | -3.95768000 |
| C  | 3.27410000  | 2.13449600  | 0.64802600  |
| C  | -3.40644700 | -0.79984800 | 3.26276600  |
| C  | -2.29019500 | -5.21907600 | -0.94439800 |
| C  | 1.24151600  | 0.48783700  | -2.05155700 |
| C  | -2.70199100 | -1.82402900 | 2.34741400  |
| C  | 3.87086400  | -4.65795000 | -1.36928400 |
| C  | 7.02755500  | -0.79743000 | -0.71077300 |
| C  | -2.65001200 | -1.80874800 | -4.34686200 |
| C  | -5.33875500 | -1.93106300 | 0.74531500  |

|   |             |             |             |                                                             |             |             |             |
|---|-------------|-------------|-------------|-------------------------------------------------------------|-------------|-------------|-------------|
| C | 6.81712400  | 1.87178000  | -1.56268700 | H                                                           | -1.58169700 | -1.55846200 | -4.33210500 |
| C | 4.06407800  | 4.30469800  | -0.43621000 | H                                                           | -5.01890800 | -2.51454300 | 1.59939500  |
| C | -2.09454700 | -2.72859400 | -0.46170800 | H                                                           | 7.23253200  | 2.02741600  | -0.55835000 |
| C | 3.67222000  | 5.10630400  | 0.81193400  | H                                                           | 6.48254600  | 2.82992700  | -1.96233800 |
| C | -1.38166400 | -2.64595600 | 4.36822800  | H                                                           | 7.59516400  | 1.45381900  | -2.21442600 |
| C | -1.30318700 | -2.14522700 | 2.91512400  | H                                                           | 5.12504800  | 4.02358700  | -0.35776400 |
| C | -3.49480800 | -1.29780500 | 4.71533200  | H                                                           | 3.97179500  | 4.92988800  | -1.33446400 |
| C | 3.71072600  | 4.21944900  | 2.06282300  | H                                                           | -2.58291600 | -2.51506700 | -1.42006400 |
| C | -0.78317100 | -5.29333600 | -1.22996200 | H                                                           | 4.33660000  | 5.97238000  | 0.93398500  |
| C | 6.04386000  | -3.01372000 | -0.69194100 | H                                                           | 2.65646600  | 5.50357700  | 0.67961300  |
| C | -0.24735200 | -3.93870900 | -1.71647900 | H                                                           | -1.91248900 | -3.60988200 | 4.39214900  |
| C | -0.58144700 | -2.80761500 | -0.72956900 | H                                                           | -0.36920400 | -2.83928900 | 4.74740700  |
| C | 3.14021300  | -3.14954400 | 2.23589700  | H                                                           | -0.80207500 | -2.89939800 | 2.29836200  |
| C | -5.36571400 | 3.68078600  | -0.58672000 | H                                                           | -0.68302300 | -1.23989200 | 2.86487700  |
| C | 7.11971100  | -2.16216300 | -0.45385700 | H                                                           | -3.97964000 | -0.53603800 | 5.34029400  |
| C | 4.04919900  | -1.38150500 | 3.78831800  | H                                                           | -4.13876200 | -2.18944500 | 4.75729600  |
| C | -2.10945600 | -1.64639900 | 5.27756600  | H                                                           | 3.36869700  | 4.78188400  | 2.94231200  |
| C | 3.32157900  | -2.72870300 | 3.69998400  | H                                                           | 4.75081900  | 3.92321100  | 2.26923000  |
| C | -2.39109100 | 2.62335600  | 1.43213100  | H                                                           | -0.25556400 | -5.58125100 | -0.30782200 |
| C | -1.75898800 | 3.30865100  | 0.36891100  | H                                                           | -0.57421800 | -6.07957100 | -1.96802300 |
| C | -2.01883900 | 2.93060400  | 2.76099900  | H                                                           | 6.14556900  | -4.07550600 | -0.50549000 |
| C | -0.82241700 | 4.30612900  | 0.66539200  | H                                                           | -0.69241100 | -3.70783400 | -2.69599700 |
| C | -1.06419000 | 3.90692500  | 3.01991000  | H                                                           | 0.83802900  | -3.97947600 | -1.87312900 |
| C | -0.46858800 | 4.62492700  | 1.97127600  | H                                                           | -0.04381600 | -2.98539100 | 0.20978700  |
| H | -7.36143400 | -2.62820100 | 0.96530200  | H                                                           | -0.21632200 | -1.84947800 | -1.11313500 |
| H | -8.18579100 | -1.32193700 | -1.00884400 | H                                                           | 2.57429800  | -4.08948700 | 2.17637100  |
| H | -6.58762800 | 0.08564900  | -2.26767900 | H                                                           | 4.12748100  | -3.34571900 | 1.79215500  |
| H | 3.56495900  | 2.47393100  | -1.48082400 | H                                                           | -4.49003500 | 4.31576100  | -0.40606800 |
| H | 2.17511100  | 3.31710100  | -0.80216400 | H                                                           | -6.03100600 | 3.73526100  | 0.27683800  |
| H | 4.14230500  | -0.80534400 | 1.05045600  | H                                                           | -5.89706000 | 4.03480300  | -1.47970200 |
| H | 0.26641200  | 0.65398200  | -3.95897100 | H                                                           | 8.05080800  | -2.57226100 | -0.07208400 |
| H | 4.12586800  | -1.23613500 | -3.90718900 | H                                                           | 5.07545900  | -1.50251900 | 3.41059400  |
| H | 3.93673400  | 0.63241800  | 3.03329400  | H                                                           | 4.13758200  | -1.06042000 | 4.83474300  |
| H | 2.36574400  | -0.06222300 | 3.42736300  | H                                                           | -1.50965100 | -0.72714800 | 5.35499000  |
| H | -3.81029600 | 3.89868400  | -2.56194100 | H                                                           | -2.19841500 | -2.04924100 | 6.29500100  |
| H | 1.79774200  | 3.25533800  | 1.75894400  | H                                                           | 2.33363600  | -2.64091400 | 4.17702400  |
| H | 2.88259300  | 2.35927600  | 2.79801100  | H                                                           | 3.87200200  | -3.49744700 | 4.25839600  |
| H | 2.15626000  | -0.46151400 | -5.18372600 | H                                                           | -3.29222800 | 2.05274600  | 1.23731100  |
| H | -3.71422400 | -4.04184000 | 0.18702500  | H                                                           | -2.07453600 | 3.15462100  | -0.65614000 |
| H | -2.18225100 | -4.32507400 | 1.01603000  | H                                                           | -2.51347700 | 2.42478500  | 3.58487800  |
| H | -2.49923000 | 3.03760100  | -4.46487700 | H                                                           | -0.79372000 | 4.14572200  | 4.04528300  |
| H | 2.33262200  | -2.37887500 | 0.37879600  | H                                                           | 0.24431900  | 5.41757200  | 2.17045600  |
| H | 1.40377200  | -1.93558400 | 1.80545600  | $^{tol}6_{tBu}^{\ddagger} [Pd(P^tBu_3)_2(PhMe)]^{\ddagger}$ |             |             |             |
| H | -2.22935500 | 0.61304400  | -4.81769300 | Pd                                                          | 0.47492300  | 0.24225100  | -0.08667600 |
| H | 4.31330800  | 1.79879600  | 0.78020800  | P                                                           | -2.92931200 | -0.37825700 | -0.01133500 |
| H | -2.83335700 | 0.13576900  | 3.23296300  | P                                                           | 2.54338600  | -0.72791100 | -0.01434100 |
| H | -4.40915900 | -0.56609400 | 2.88796300  | C                                                           | -3.04907700 | -1.88164800 | -1.24754300 |
| H | -2.65220300 | -6.17707800 | -0.54754500 | C                                                           | -2.17998900 | -3.04257700 | -0.71732200 |
| H | -2.83028500 | -5.04871400 | -1.88759500 | H                                                           | -1.18061700 | -2.69993800 | -0.43334900 |
| H | 0.40142500  | 0.94158900  | -1.52587300 | H                                                           | -2.63161800 | -3.55914700 | 0.13315200  |
| H | -3.27547600 | -2.75968900 | 2.36411100  | H                                                           | -2.06116800 | -3.78603600 | -1.51737000 |
| H | 4.67404500  | -5.04130600 | -2.01194700 | C                                                           | -2.37769600 | -1.42763800 | -2.56744500 |
| H | 2.91448200  | -5.06234000 | -1.70443800 | H                                                           | -1.36137700 | -1.06151400 | -2.38449500 |
| H | 4.05205100  | -4.97431300 | -0.33424500 | H                                                           | -2.31092200 | -2.28698900 | -3.24903000 |
| H | 7.88451700  | -0.15751000 | -0.54067300 | H                                                           | -2.93077100 | -0.64447300 | -3.08787600 |
| H | -3.09746500 | -1.45001300 | -5.28295500 | C                                                           | -4.45431700 | -2.43632900 | -1.55644500 |
| H | -2.76692000 | -2.89216000 | -4.28440100 |                                                             |             |             |             |

|   |             |             |             |                                                             |             |             |             |
|---|-------------|-------------|-------------|-------------------------------------------------------------|-------------|-------------|-------------|
| H | -4.35879300 | -3.30690700 | -2.22088700 | H                                                           | 0.95727600  | -2.89300900 | 1.22549000  |
| H | -4.97896100 | -2.76811800 | -0.65659700 | H                                                           | 2.42063500  | -3.81060000 | 0.80505100  |
| H | -5.09164400 | -1.71236200 | -2.07055200 | H                                                           | 1.98268000  | -3.57940100 | 2.49513200  |
| C | -4.41305300 | 0.82805200  | -0.43421500 | C                                                           | 2.19935400  | -0.99968100 | 2.79577800  |
| C | -5.82418300 | 0.37774500  | -0.00511100 | H                                                           | 1.16747200  | -0.70945600 | 2.57653200  |
| H | -6.10607200 | -0.58907600 | -0.42907900 | H                                                           | 2.19983900  | -1.64038100 | 3.68885600  |
| H | -5.92753200 | 0.31524100  | 1.08119900  | H                                                           | 2.75431700  | -0.09436000 | 3.04360300  |
| H | -6.56011000 | 1.11669600  | -0.35364100 | C                                                           | 4.26671000  | -2.15716300 | 1.97533500  |
| C | -4.43731000 | 1.10620000  | -1.95431300 | H                                                           | 4.26031200  | -2.78546800 | 2.87738700  |
| H | -4.78697500 | 0.25541000  | -2.54277600 | H                                                           | 4.76943200  | -2.72543900 | 1.18912300  |
| H | -5.13004500 | 1.93644000  | -2.14697600 | H                                                           | 4.87787000  | -1.28071800 | 2.20515900  |
| H | -3.45554600 | 1.40955000  | -2.33310800 | C                                                           | 0.20088700  | 3.67269700  | -1.92732000 |
| C | -4.11132600 | 2.19866800  | 0.22204000  | C                                                           | -0.50850100 | 2.76592000  | -1.12991300 |
| H | -4.90231900 | 2.90733400  | -0.06045400 | C                                                           | -0.38565900 | 2.81053100  | 0.26399700  |
| H | -4.08411300 | 2.16558100  | 1.31146600  | C                                                           | 0.43821600  | 3.76905400  | 0.88538400  |
| H | -3.16098000 | 2.61158900  | -0.12643100 | C                                                           | 1.13168200  | 4.67069900  | 0.07338500  |
| C | -3.23900900 | -1.06433200 | 1.79026500  | C                                                           | 1.01721400  | 4.62550800  | -1.32162100 |
| C | -4.37291200 | -2.09256300 | 1.97664500  | H                                                           | 0.10691500  | 3.63673900  | -3.00937800 |
| H | -5.35223000 | -1.70216100 | 1.68886200  | H                                                           | -1.17762600 | 2.04231300  | -1.58676600 |
| H | -4.19637800 | -3.01131200 | 1.41204000  | H                                                           | -0.98620100 | 2.14124900  | 0.87823300  |
| H | -4.43211100 | -2.37508600 | 3.03754000  | H                                                           | 1.76581000  | 5.42441400  | 0.53530800  |
| C | -1.90959800 | -1.69714700 | 2.26778200  | H                                                           | 1.56362600  | 5.34208400  | -1.92964800 |
| H | -1.69542400 | -2.65391200 | 1.78986000  | C                                                           | 0.55214100  | 3.81976700  | 2.39138200  |
| H | -1.06039700 | -1.03286600 | 2.07285500  | H                                                           | 1.18296700  | 4.65326900  | 2.71687100  |
| H | -1.96618400 | -1.87946500 | 3.34999700  | H                                                           | -0.43106900 | 3.94009500  | 2.86396300  |
| C | -3.49909500 | 0.12398000  | 2.74275400  | H                                                           | 0.98750100  | 2.89374500  | 2.78760200  |
| H | -3.47697800 | -0.24304800 | 3.77759000  | <b>7<sub>H</sub> [Pd(PH<sub>3</sub>)<sub>2</sub>(PhBr)]</b> |             |             |             |
| H | -2.72594900 | 0.89546500  | 2.65486300  | Pd                                                          | -1.68341600 | 0.11846700  | 0.11279500  |
| H | -4.47490200 | 0.59049800  | 2.59000800  | P                                                           | -1.91937100 | 2.41681800  | -0.13461000 |
| C | 2.87377800  | -1.91338800 | -1.54049000 | P                                                           | -3.12314100 | -1.35156700 | -0.96627300 |
| C | 4.06664300  | -2.88466600 | -1.42296600 | Br                                                          | 3.77186400  | 0.31044100  | -0.50668000 |
| H | 5.01635800  | -2.37514900 | -1.24470500 | C                                                           | 1.39559000  | 0.44866900  | 1.09084000  |
| H | 3.92530100  | -3.62534700 | -0.63190600 | C                                                           | 0.18923700  | -0.04727100 | 1.64696100  |
| H | 4.16739500  | -3.44102700 | -2.36562100 | C                                                           | -0.23146600 | -1.36570800 | 1.34935700  |
| C | 1.58943000  | -2.73730100 | -1.78451400 | C                                                           | 0.56508700  | -2.16617600 | 0.49335200  |
| H | 1.35281200  | -3.42325200 | -0.97063200 | C                                                           | 1.73108700  | -1.67156300 | -0.06570300 |
| H | 0.73046300  | -2.07579900 | -1.92668000 | C                                                           | 2.13225600  | -0.35755500 | 0.24523700  |
| H | 1.71976100  | -3.33883900 | -2.69537300 | H                                                           | -0.28629500 | 0.51240700  | 2.44711300  |
| C | 3.06235600  | -1.06403100 | -2.81721900 | H                                                           | -1.03017600 | -1.82633800 | 1.92291400  |
| H | 3.02671600  | -1.73100500 | -3.68941500 | H                                                           | 0.26346700  | -3.18949900 | 0.28542200  |
| H | 2.26160400  | -0.32560200 | -2.93039200 | H                                                           | 2.34001800  | -2.28734200 | -0.71842900 |
| H | 4.02356100  | -0.54613900 | -2.85047200 | H                                                           | -3.12871600 | 3.00016400  | -0.59911600 |
| C | 3.95596800  | 0.63350200  | -0.04471500 | H                                                           | -1.73249000 | 3.36035000  | 0.91520100  |
| C | 3.55543800  | 1.71105200  | -1.07870100 | H                                                           | -1.08443500 | 3.09636700  | -1.06198000 |
| H | 2.56264500  | 2.11390200  | -0.86476500 | H                                                           | -2.70600600 | -1.95552100 | -2.18344000 |
| H | 4.28089800  | 2.53529800  | -1.02639800 | H                                                           | -3.61614400 | -2.55853800 | -0.39334900 |
| H | 3.55386100  | 1.34342000  | -2.10489700 | H                                                           | -4.38879500 | -0.93463200 | -1.45931800 |
| C | 3.99212700  | 1.36060900  | 1.31763700  | H                                                           | 1.73839300  | 1.44651600  | 1.34316900  |
| H | 2.99456300  | 1.69433200  | 1.62034000  | <b>7<sub>H</sub> [Pd(PH<sub>3</sub>)<sub>2</sub>(PhCl)]</b> |             |             |             |
| H | 4.41931800  | 0.75250200  | 2.11862700  | Pd                                                          | -1.18513200 | 0.08750000  | 0.12821500  |
| H | 4.62502300  | 2.25315800  | 1.21983400  | P                                                           | -1.61683700 | 2.34780200  | -0.18895900 |
| C | 5.38355500  | 0.14693500  | -0.37092500 | P                                                           | -2.58117200 | -1.53101800 | -0.78452800 |
| H | 6.07513400  | 0.99742700  | -0.28868400 | Cl                                                          | 4.05295700  | 0.54976300  | -0.86473900 |
| H | 5.74090400  | -0.62710800 | 0.31239600  | C                                                           | 1.93064800  | 0.67449000  | 0.83734300  |
| H | 5.47247700  | -0.23388100 | -1.39176000 | C                                                           | 0.81044100  | 0.12973900  | 1.51282000  |
| C | 2.81343100  | -1.78709700 | 1.61360400  |                                                             |             |             |             |
| C | 1.99479400  | -3.09275900 | 1.51035700  |                                                             |             |             |             |



|   |             |             |             |
|---|-------------|-------------|-------------|
| C | 0.46218600  | -1.22770700 | 1.31285900  |
| C | 1.24667500  | -2.01817400 | 0.43664000  |
| C | 2.32810800  | -1.47677800 | -0.23613800 |
| C | 2.65734800  | -0.12315600 | -0.02582100 |
| H | 0.35894400  | 0.69770300  | 2.32080300  |
| H | -0.25773300 | -1.70899300 | 1.96797500  |
| H | 1.00372600  | -3.06922900 | 0.30429200  |
| H | 2.93236100  | -2.08148100 | -0.90392300 |
| H | -2.89810700 | 2.81647400  | -0.58582600 |
| H | -1.43294100 | 3.34848900  | 0.80729800  |
| H | -0.90587500 | 3.04852800  | -1.20034700 |
| H | -2.20743200 | -2.14820700 | -2.00918700 |
| H | -2.93500900 | -2.74950900 | -0.13746400 |
| H | -3.90842700 | -1.23192800 | -1.19427900 |
| H | 2.22401700  | 1.70494300  | 1.00938600  |

**7<sub>tBu</sub>\* [Pd(PtBu<sub>3</sub>)(Ph)(Br)]\***

|    |             |             |             |
|----|-------------|-------------|-------------|
| Pd | -0.82575300 | -0.33063000 | 0.00229500  |
| Br | -2.07205700 | -2.41707100 | 0.02041700  |
| P  | 1.66305200  | 0.22028100  | 0.00236700  |
| C  | 2.29274300  | 0.51088600  | 1.81716800  |
| C  | 2.66442700  | -1.24222900 | -0.80149300 |
| C  | 1.93761200  | 1.83669100  | -1.03973500 |
| C  | -4.74599300 | 2.26484700  | -0.00187300 |
| C  | -4.23497800 | 1.78021700  | -1.20815000 |
| C  | -3.16762100 | 0.87446200  | -1.21301600 |
| C  | -2.59259300 | 0.50069500  | 0.00508100  |
| C  | -3.12905100 | 0.93141400  | 1.22196900  |
| C  | -4.19711300 | 1.83616900  | 1.20899600  |
| H  | -5.58316000 | 2.95756200  | -0.00474800 |
| H  | -4.67575100 | 2.08973300  | -2.15273200 |
| H  | -2.79352700 | 0.47259800  | -2.14998100 |
| H  | -2.72509000 | 0.57388200  | 2.16464200  |
| H  | -4.60832800 | 2.18926200  | 2.15161200  |
| C  | 1.65603900  | -0.57530000 | 2.71910900  |
| H  | 1.92426800  | -0.36377600 | 3.76290800  |
| H  | 0.56370000  | -0.56736200 | 2.64177300  |
| H  | 1.99813100  | -1.58480100 | 2.49294700  |
| C  | 1.74781400  | 1.85797800  | 2.34171700  |
| H  | 1.95800300  | 1.91935000  | 3.41718300  |
| H  | 2.21898300  | 2.72496300  | 1.87331600  |
| H  | 0.66242800  | 1.93608700  | 2.21679700  |
| C  | 0.80283800  | 2.83004700  | -0.68739500 |
| H  | 0.89883100  | 3.71427800  | -1.33161100 |
| H  | -0.18517000 | 2.39283700  | -0.87198600 |
| H  | 0.82981600  | 3.17676700  | 0.34536000  |
| C  | 1.76103800  | 1.52045400  | -2.54157100 |
| H  | 1.74572200  | 2.46951600  | -3.09292900 |
| H  | 2.57759300  | 0.92369800  | -2.95285600 |
| H  | 0.81469300  | 1.00818200  | -2.74347300 |
| C  | 3.30051300  | 2.53184300  | -0.84383200 |
| H  | 4.14336700  | 1.87941600  | -1.08668300 |
| H  | 3.43981100  | 2.90305800  | 0.17459200  |
| H  | 3.35607700  | 3.40149900  | -1.51254500 |
| C  | 3.82363500  | 0.49500300  | 2.00265300  |
| H  | 4.26273300  | -0.47904600 | 1.77257000  |
| H  | 4.05739500  | 0.71166200  | 3.05380100  |

|   |            |             |             |
|---|------------|-------------|-------------|
| H | 4.33005000 | 1.24918900  | 1.39418900  |
| C | 1.86367400 | -1.76100500 | -2.02087000 |
| H | 2.38182600 | -2.64050500 | -2.42575700 |
| H | 0.85330700 | -2.07075000 | -1.73551800 |
| H | 1.78023700 | -1.03436400 | -2.82898400 |
| C | 2.72807400 | -2.42654400 | 0.18851800  |
| H | 3.14399500 | -3.29257300 | -0.34212800 |
| H | 3.37702900 | -2.23437000 | 1.04573300  |
| H | 1.73538300 | -2.71275600 | 0.55065100  |
| C | 4.09898300 | -0.89008200 | -1.24403500 |
| H | 4.71482000 | -0.51255400 | -0.42372700 |
| H | 4.58437500 | -1.79815100 | -1.62623100 |
| H | 4.11907300 | -0.15355500 | -2.05129200 |

**7<sub>tBu</sub>\* [Pd(PtBu<sub>3</sub>)(Ph)(Cl)]\***

|    |             |             |             |
|----|-------------|-------------|-------------|
| Pd | 0.93716400  | -0.61241700 | 0.04683000  |
| P  | -1.48711600 | 0.16950600  | -0.00902100 |
| Cl | 1.84799900  | -2.73081800 | 0.15893800  |
| C  | -2.44246800 | -0.72209800 | -1.44888000 |
| C  | -2.38021300 | -0.18198500 | 1.67973900  |
| C  | -1.47132300 | 2.08433700  | -0.33540200 |
| C  | 5.18076900  | 1.41155100  | -0.06723800 |
| C  | 4.52388600  | 1.22707600  | 1.15161400  |
| C  | 3.33201700  | 0.49468500  | 1.20921200  |
| C  | 2.78986700  | -0.00838100 | 0.02353300  |
| C  | 3.46312700  | 0.11851500  | -1.19398100 |
| C  | 4.65311600  | 0.85434200  | -1.23454500 |
| H  | 6.11158100  | 1.97102800  | -0.10418500 |
| H  | 4.94348200  | 1.63692000  | 2.06717700  |
| H  | 2.83892600  | 0.32486500  | 2.16241200  |
| H  | 3.07152300  | -0.34428900 | -2.09475400 |
| H  | 5.17387700  | 0.97439000  | -2.18151200 |
| C  | -2.04403700 | -2.21823700 | -1.41962100 |
| H  | -2.50756700 | -2.71863700 | -2.28021400 |
| H  | -0.95947300 | -2.34684900 | -1.49577700 |
| H  | -2.37747500 | -2.74035800 | -0.52354200 |
| C  | -1.94548700 | -0.18634100 | -2.80984500 |
| H  | -2.36361300 | -0.82242300 | -3.60066800 |
| H  | -2.27007500 | 0.83561300  | -3.01732300 |
| H  | -0.85493800 | -0.23755600 | -2.89466900 |
| C  | -0.37538000 | 2.38115900  | -1.38886500 |
| H  | -0.34160800 | 3.46475300  | -1.56415500 |
| H  | 0.61464400  | 2.07277000  | -1.03268100 |
| H  | -0.54973100 | 1.89973600  | -2.35064500 |
| C  | -1.02532600 | 2.82989100  | 0.94282800  |
| H  | -0.84345600 | 3.88062400  | 0.68184200  |
| H  | -1.78094600 | 2.82293600  | 1.73164000  |
| H  | -0.08958700 | 2.42892300  | 1.34609800  |
| C  | -2.80930800 | 2.68861700  | -0.80885400 |
| H  | -3.62710800 | 2.50501300  | -0.10692100 |
| H  | -3.11416500 | 2.31538100  | -1.78965100 |
| H  | -2.69499000 | 3.77710500  | -0.90128900 |
| C  | -3.97897600 | -0.59577100 | -1.40412600 |
| H  | -4.41146700 | -1.05635400 | -0.51267100 |
| H  | -4.40396500 | -1.11823600 | -2.27179500 |
| H  | -4.31744100 | 0.44302100  | -1.45032300 |
| C  | -1.37653700 | 0.11559200  | 2.82094900  |

|   |             |             |            |
|---|-------------|-------------|------------|
| H | -1.83669300 | -0.17685200 | 3.77405000 |
| H | -0.45647700 | -0.46634500 | 2.70090500 |
| H | -1.10553300 | 1.16874200  | 2.90214700 |
| C | -2.69775400 | -1.69010700 | 1.79060200 |
| H | -3.05088900 | -1.89325600 | 2.80988200 |
| H | -3.48692300 | -2.01255800 | 1.10844500 |
| H | -1.81078700 | -2.30972300 | 1.62156200 |
| C | -3.67636200 | 0.61812000  | 1.91787100 |
| H | -4.43639800 | 0.42365300  | 1.15657800 |
| H | -4.10154600 | 0.32953000  | 2.88843700 |
| H | -3.49764200 | 1.69515400  | 1.95087100 |

**7<sub>tBu</sub>\* [Pd(PtBu3)(Ph)(I)]\***

|    |             |             |             |
|----|-------------|-------------|-------------|
| Pd | -0.66692200 | -0.08675000 | -0.03876700 |
| I  | -2.36678000 | -2.06336400 | 0.00717400  |
| P  | 1.86869800  | 0.15553300  | -0.00389300 |
| C  | 2.38943900  | 1.03962700  | 1.64737100  |
| C  | 2.73675800  | -1.58389600 | -0.09790300 |
| C  | 2.43610300  | 1.23827900  | -1.51500100 |
| C  | -4.07809500 | 3.15234200  | 0.01280700  |
| C  | -3.67510900 | 2.59014700  | -1.20070700 |
| C  | -2.79306500 | 1.50358800  | -1.22102700 |
| C  | -2.28319600 | 1.01968900  | -0.01131100 |
| C  | -2.72217100 | 1.53628000  | 1.21263600  |
| C  | -3.60534800 | 2.62210100  | 1.21542200  |
| H  | -4.77483900 | 3.98608100  | 0.02194200  |
| H  | -4.06036500 | 2.98112200  | -2.13933900 |
| H  | -2.51034900 | 1.04654700  | -2.16449300 |
| H  | -2.38518600 | 1.10381500  | 2.14992700  |
| H  | -3.93628300 | 3.03738400  | 2.16429000  |
| C  | 1.55698500  | 0.42766300  | 2.80104300  |
| H  | 1.76048300  | 0.99609300  | 3.71838600  |
| H  | 0.48310400  | 0.49087100  | 2.59518200  |
| H  | 1.79621700  | -0.61582500 | 3.00464400  |
| C  | 1.97935300  | 2.52760300  | 1.58001500  |
| H  | 2.10162200  | 2.96612300  | 2.57879900  |
| H  | 2.59857100  | 3.11271800  | 0.89648600  |
| H  | 0.92881300  | 2.65086700  | 1.29629700  |
| C  | 1.42220800  | 2.39773200  | -1.67834800 |
| H  | 1.66041500  | 2.94464100  | -2.60042900 |
| H  | 0.39627700  | 2.02391200  | -1.76925600 |
| H  | 1.44598700  | 3.11777900  | -0.86052800 |
| C  | 2.32671500  | 0.40489000  | -2.81117200 |
| H  | 2.47934700  | 1.07592100  | -3.66634900 |
| H  | 3.08261000  | -0.37990900 | -2.88111300 |
| H  | 1.33678300  | -0.04930000 | -2.92326900 |
| C  | 3.86046700  | 1.82177300  | -1.42501500 |
| H  | 4.62568600  | 1.04909300  | -1.31678000 |
| H  | 3.97235500  | 2.52946500  | -0.59982600 |
| H  | 4.07862200  | 2.37172500  | -2.35048200 |
| C  | 3.88717200  | 0.95930400  | 2.00537800  |
| H  | 4.21590500  | -0.06409000 | 2.20305000  |
| H  | 4.06575100  | 1.53675200  | 2.92252100  |
| H  | 4.52921200  | 1.37765000  | 1.22600300  |
| C  | 1.97887100  | -2.44587600 | -1.13712300 |
| H  | 2.40905700  | -3.45622300 | -1.12803300 |
| H  | 0.91619500  | -2.53396100 | -0.88954500 |

|   |            |             |             |
|---|------------|-------------|-------------|
| H | 2.05861900 | -2.06939500 | -2.15694500 |
| C | 2.57006000 | -2.31580100 | 1.25226800  |
| H | 2.90849000 | -3.35187200 | 1.12336700  |
| H | 3.17116300 | -1.88026800 | 2.05350200  |
| H | 1.52387900 | -2.35321600 | 1.57227100  |
| C | 4.23567900 | -1.55036700 | -0.45753600 |
| H | 4.82327600 | -0.94486900 | 0.23715200  |
| H | 4.63191500 | -2.57395000 | -0.41685400 |
| H | 4.41698300 | -1.18032400 | -1.46991000 |

**8<sub>Cy</sub>\* [Pd(PCy3)<sub>2</sub>(Ph...Br)]\* (conformer F)**

|    |             |             |             |
|----|-------------|-------------|-------------|
| Pd | -0.01676300 | -0.78100300 | -0.05063600 |
| Br | 0.37990500  | -3.00277400 | 1.52266500  |
| P  | 2.23504400  | 0.35463600  | 0.02428100  |
| P  | -2.14935900 | 0.37226900  | 0.06578000  |
| C  | 2.76939800  | 0.78056500  | 4.20900500  |
| C  | 2.45952400  | 0.15167200  | 2.83986300  |
| C  | 2.60028900  | 1.17628800  | 1.69182900  |
| C  | 1.69878200  | 2.39653000  | 1.97110700  |
| C  | 2.00565600  | 3.02926600  | 3.34054300  |
| C  | 1.88916400  | 2.00810000  | 4.48012200  |
| C  | 6.04329000  | -1.65998300 | 0.42615500  |
| C  | 5.06081000  | -0.47398800 | 0.48346000  |
| C  | 3.70047100  | -0.85502700 | -0.14523200 |
| C  | 3.93113800  | -1.31671300 | -1.60153200 |
| C  | 4.89424300  | -2.51449900 | -1.66290000 |
| C  | 6.24019700  | -2.17931100 | -1.00491500 |
| C  | 2.04927600  | 2.66016700  | -3.54512900 |
| C  | 2.05281200  | 1.41970300  | -2.63514600 |
| C  | 2.49936600  | 1.77751000  | -1.19916000 |
| C  | 3.88021000  | 2.46568600  | -1.21890800 |
| C  | 3.87226500  | 3.70736300  | -2.12969200 |
| C  | 3.41590400  | 3.36154300  | -3.55470900 |
| C  | -2.82185300 | 0.54263700  | 4.24963800  |
| C  | -2.12614600 | 0.64872800  | 2.88166000  |
| C  | -3.04287600 | 0.18544500  | 1.72744300  |
| C  | -3.53379000 | -1.25097700 | 2.00576600  |
| C  | -4.24415100 | -1.35205100 | 3.36753100  |
| C  | -3.33939700 | -0.87780100 | 4.51282600  |
| C  | -3.91805900 | -0.99823700 | -3.54957300 |
| C  | -2.89864900 | -0.32340100 | -2.61503700 |
| C  | -3.46183900 | -0.18105500 | -1.18212800 |
| C  | -4.80701000 | 0.57312700  | -1.20021700 |
| C  | -5.82189600 | -0.11649100 | -2.13049900 |
| C  | -5.26723500 | -0.26525100 | -3.55439800 |
| C  | -1.98542700 | 2.27115000  | -0.04774800 |
| C  | -3.12818100 | 3.15948400  | 0.49619600  |
| C  | -0.48944400 | -2.79833700 | -0.51232100 |
| C  | 0.45041000  | -3.05109200 | -1.52999400 |
| C  | -1.79390000 | -3.32174400 | -0.62602800 |
| C  | 0.03302300  | -3.65693400 | -2.72377000 |
| C  | -1.27826800 | -4.10255600 | -2.87089900 |
| C  | -2.29690400 | 5.11631200  | -0.90921600 |
| C  | -1.18134300 | 4.22461800  | -1.47225300 |
| C  | -1.58494000 | 2.73999500  | -1.46166000 |
| C  | -2.18031600 | -3.94714700 | -1.80678100 |
| C  | -2.72479200 | 4.64650600  | 0.48755900  |

|   |             |             |             |                                                                                                        |             |             |             |
|---|-------------|-------------|-------------|--------------------------------------------------------------------------------------------------------|-------------|-------------|-------------|
| H | 3.82816700  | 1.07950300  | 4.24279100  | H                                                                                                      | -3.40022000 | 2.87290600  | 1.51714700  |
| H | 2.63240400  | 0.03025900  | 4.99827500  | H                                                                                                      | 1.49513800  | -2.81434200 | -1.37578700 |
| H | 3.11446200  | -0.71192400 | 2.67732800  | H                                                                                                      | -2.49004400 | -3.22689200 | 0.19814400  |
| H | 1.43570500  | -0.24414300 | 2.83735700  | H                                                                                                      | 0.75971600  | -3.82006500 | -3.51635500 |
| H | 3.63972000  | 1.53282400  | 1.67109200  | H                                                                                                      | -1.59003000 | -4.60329100 | -3.78301200 |
| H | 1.81781700  | 3.15819300  | 1.19138000  | H                                                                                                      | -3.16406000 | 5.08008500  | -1.58551000 |
| H | 0.64840100  | 2.07682000  | 1.94587000  | H                                                                                                      | -1.97047600 | 6.16376300  | -0.87660900 |
| H | 1.32997500  | 3.87701700  | 3.51462900  | H                                                                                                      | -0.92516800 | 4.53378100  | -2.49414900 |
| H | 3.02567500  | 3.44151700  | 3.32615600  | H                                                                                                      | -0.27174300 | 4.35707700  | -0.86720100 |
| H | 0.84088700  | 1.68767300  | 4.57352500  | H                                                                                                      | -0.76580200 | 2.12098800  | -1.84497400 |
| H | 2.16151600  | 2.47201800  | 5.43686500  | H                                                                                                      | -2.43202100 | 2.60421500  | -2.14664500 |
| H | 5.65633200  | -2.47380600 | 1.05681600  | H                                                                                                      | -3.19627300 | -4.32503100 | -1.89684800 |
| H | 7.00706600  | -1.36179600 | 0.85929400  | H                                                                                                      | -1.89207200 | 4.79716000  | 1.19095800  |
| H | 4.94279800  | -0.16377800 | 1.52606900  | H                                                                                                      | -3.55851700 | 5.25758700  | 0.85735700  |
| H | 5.49546300  | 0.38092400  | -0.05076700 | <b>8<sub>Cy</sub><sup>‡</sup> [Pd(PCy<sub>3</sub>)<sub>2</sub>(Ph···Cl)]<sup>‡</sup> (conformer F)</b> |             |             |             |
| H | 3.32161400  | -1.72702100 | 0.40928100  | Pd                                                                                                     | -0.03572800 | 0.78554500  | -0.40373200 |
| H | 2.98292600  | -1.56866100 | -2.08837400 | P                                                                                                      | 2.26513000  | -0.20942100 | 0.02346800  |
| H | 4.36681100  | -0.49141300 | -2.17986600 | P                                                                                                      | -2.12697800 | -0.32533500 | 0.01199400  |
| H | 5.04559200  | -2.81695000 | -2.70738300 | Cl                                                                                                     | 0.51495700  | 2.15088000  | -2.55886600 |
| H | 4.43827700  | -3.37377800 | -1.14965700 | C                                                                                                      | 2.69271000  | -2.55047000 | -3.48290100 |
| H | 6.75038200  | -1.40875200 | -1.60239100 | C                                                                                                      | 2.37750000  | -1.36358200 | -2.55682200 |
| H | 6.89635900  | -3.05902700 | -1.00399500 | C                                                                                                      | 2.63293400  | -1.70931400 | -1.07222000 |
| H | 1.28363500  | 3.36702200  | -3.19341700 | C                                                                                                      | 1.82224500  | -2.96230200 | -0.68068000 |
| H | 1.76235800  | 2.37128100  | -4.56468700 | C                                                                                                      | 2.13324700  | -4.15204200 | -1.60686300 |
| H | 1.05743500  | 0.96013000  | -2.61111900 | C                                                                                                      | 1.90200600  | -3.80375600 | -3.08355100 |
| H | 2.72993100  | 0.67166900  | -3.06436900 | C                                                                                                      | 5.92537300  | 1.53625300  | -1.49000600 |
| H | 1.77280600  | 2.51845100  | -0.83236000 | C                                                                                                      | 5.01599500  | 0.42272000  | -0.93485500 |
| H | 4.18709200  | 2.75234900  | -0.20581200 | C                                                                                                      | 3.65136300  | 0.99598000  | -0.48755400 |
| H | 4.63755300  | 1.76163300  | -1.58826500 | C                                                                                                      | 3.88851200  | 2.10283000  | 0.56348400  |
| H | 4.87133300  | 4.16218200  | -2.14786700 | C                                                                                                      | 4.78042500  | 3.22534800  | 0.00728500  |
| H | 3.19348800  | 4.46167000  | -1.70452100 | C                                                                                                      | 6.12775200  | 2.67423600  | -0.48022400 |
| H | 4.15979800  | 2.69817200  | -4.02096200 | C                                                                                                      | 2.29532200  | -0.55268700 | 4.25940000  |
| H | 3.37609600  | 4.26817400  | -4.17208800 | C                                                                                                      | 2.19779100  | 0.10727500  | 2.87320100  |
| H | -3.66513100 | 1.24904100  | 4.28456600  | C                                                                                                      | 2.64637500  | -0.86520400 | 1.75881000  |
| H | -2.12631800 | 0.84894900  | 5.04215700  | C                                                                                                      | 4.07267800  | -1.38466900 | 2.03466900  |
| H | -1.79282500 | 1.68164000  | 2.72353300  | C                                                                                                      | 4.17210600  | -2.03874800 | 3.42520600  |
| H | -1.22175800 | 0.02446400  | 2.87757700  | C                                                                                                      | 3.71008800  | -1.08373200 | 4.53537300  |
| H | -3.92666700 | 0.83827300  | 1.70440300  | C                                                                                                      | -2.69780400 | -2.58169900 | -3.54294700 |
| H | -4.21803900 | -1.58733100 | 1.21757100  | C                                                                                                      | -2.03043000 | -1.99535100 | -2.28673500 |
| H | -2.67377800 | -1.93279500 | 2.00183000  | C                                                                                                      | -2.95731400 | -1.00119900 | -1.55338000 |
| H | -4.56475200 | -2.38773200 | 3.53889600  | C                                                                                                      | -3.38370000 | 0.11020500  | -2.53480400 |
| H | -5.15868400 | -0.74014600 | 3.34830700  | C                                                                                                      | -4.06113900 | -0.46711400 | -3.79062700 |
| H | -2.48457300 | -1.56351400 | 4.60424900  | C                                                                                                      | -3.15663000 | -1.47939200 | -4.50660000 |
| H | -3.87881400 | -0.91725000 | 5.46795800  | C                                                                                                      | -4.04346800 | 2.57022600  | 2.46445500  |
| H | -4.06916200 | -2.03668100 | -3.22234800 | C                                                                                                      | -2.97960500 | 1.56658700  | 1.98588400  |
| H | -3.50850700 | -1.05009900 | -4.56677800 | C                                                                                                      | -3.49303800 | 0.72833300  | 0.79210100  |
| H | -1.97020500 | -0.90372200 | -2.59244500 | C                                                                                                      | -4.82223900 | 0.03309800  | 1.15179700  |
| H | -2.64643900 | 0.66451000  | -3.02080900 | C                                                                                                      | -5.88059000 | 1.05094800  | 1.61453800  |
| H | -3.66589300 | -1.20642700 | -0.84136500 | C                                                                                                      | -5.37461400 | 1.88364000  | 2.80073500  |
| H | -5.22637400 | 0.65205800  | -0.18989100 | C                                                                                                      | -1.93023500 | -1.91901000 | 1.04058800  |
| H | -4.64844500 | 1.59919400  | -1.55729200 | C                                                                                                      | -3.04833200 | -2.98648600 | 0.99727200  |
| H | -6.76135400 | 0.45182100  | -2.14223200 | C                                                                                                      | -0.57993600 | 2.78011100  | -0.87765300 |
| H | -6.06391100 | -1.11138300 | -1.72766400 | C                                                                                                      | 0.20697600  | 3.52723400  | 0.01812000  |
| H | -5.13687700 | 0.73449400  | -3.99576100 | C                                                                                                      | -1.87547200 | 3.22839900  | -1.20387200 |
| H | -5.98824300 | -0.79485400 | -4.19054400 | C                                                                                                      | -0.36302800 | 4.60332300  | 0.71022000  |
| H | -1.11162500 | 2.44952300  | 0.59554800  | C                                                                                                      | -1.67154400 | 5.00380000  | 0.44675400  |
| H | -4.02969200 | 3.03247900  | -0.11490600 |                                                                                                        |             |             |             |

|   |             |             |             |                                                                                       |             |             |             |
|---|-------------|-------------|-------------|---------------------------------------------------------------------------------------|-------------|-------------|-------------|
| C | -2.19162800 | -3.99615000 | 3.17435400  | H                                                                                     | -6.12843000 | 1.72168400  | 0.77834400  |
| C | -1.10260600 | -2.91575000 | 3.23507800  | H                                                                                     | -5.23603700 | 1.22383900  | 3.67071500  |
| C | -1.53704100 | -1.63304800 | 2.50535500  | H                                                                                     | -6.12668700 | 2.62855800  | 3.09145500  |
| C | -2.41345400 | 4.31841900  | -0.52720300 | H                                                                                     | -1.04480600 | -2.36569500 | 0.56456000  |
| C | -2.61367600 | -4.27283700 | 1.72478800  | H                                                                                     | -3.95764800 | -2.60035200 | 1.47276700  |
| H | 3.76979400  | -2.77245800 | -3.43892800 | H                                                                                     | -3.31864700 | -3.23527200 | -0.03412900 |
| H | 2.47362400  | -2.27516600 | -4.52253000 | H                                                                                     | 1.25488500  | 3.28801100  | 0.14840400  |
| H | 2.96648400  | -0.49171200 | -2.86284000 | H                                                                                     | -2.44692200 | 2.71860800  | -1.96943200 |
| H | 1.32641900  | -1.06986000 | -2.67673100 | H                                                                                     | 0.24483400  | 5.15254100  | 1.42557300  |
| H | 3.69685700  | -1.95739000 | -0.95479900 | H                                                                                     | -2.09982900 | 5.85957300  | 0.96044800  |
| H | 2.02896400  | -3.25426000 | 0.35558100  | H                                                                                     | -3.06784900 | -3.65716200 | 3.74708800  |
| H | 0.75039900  | -2.72918700 | -0.73691100 | H                                                                                     | -1.84316700 | -4.91979200 | 3.65409100  |
| H | 1.52046200  | -5.01558100 | -1.31631100 | H                                                                                     | -0.85365800 | -2.68350300 | 4.27894400  |
| H | 3.18200600  | -4.45322400 | -1.46547400 | H                                                                                     | -0.18187500 | -3.30179200 | 2.77218000  |
| H | 0.82965800  | -3.62201700 | -3.24872200 | H                                                                                     | -0.73495100 | -0.88727900 | 2.54161600  |
| H | 2.17817600  | -4.65226400 | -3.72273300 | H                                                                                     | -2.39523800 | -1.20227200 | 3.03811900  |
| H | 5.47277800  | 1.94228700  | -2.40660600 | H                                                                                     | -3.42415800 | 4.64162200  | -0.76681900 |
| H | 6.89345300  | 1.10913300  | -1.78298100 | H                                                                                     | -1.77128200 | -4.72760800 | 1.18212200  |
| H | 4.89129800  | -0.34434000 | -1.70517300 | H                                                                                     | -3.43097400 | -5.00543300 | 1.69878400  |
| H | 5.51678900  | -0.06303100 | -0.08721500 | <b>8<sub>H</sub><sup>†</sup> [Pd(PH<sub>3</sub>)<sub>2</sub>(Ph··Br)]<sup>‡</sup></b> |             |             |             |
| H | 3.19818300  | 1.48137800  | -1.36450000 | Pd                                                                                    | -0.82604900 | -0.31741300 | 0.02810700  |
| H | 2.93725100  | 2.51769200  | 0.91319100  | Br                                                                                    | 0.07766800  | 2.05664600  | -0.67170400 |
| H | 4.38034400  | 1.66949000  | 1.44467200  | P                                                                                     | -0.60521400 | -2.37062400 | -1.13529400 |
| H | 4.93792600  | 3.99150000  | 0.77774400  | P                                                                                     | -2.94409900 | -0.08801300 | 1.12455000  |
| H | 4.26191700  | 3.71948800  | -0.82701600 | C                                                                                     | 1.22374600  | 0.30202000  | 0.04472600  |
| H | 6.69650700  | 2.29609100  | 0.38276000  | C                                                                                     | 2.17353400  | -0.20466300 | -0.86225200 |
| H | 6.73134900  | 3.47564800  | -0.92509400 | C                                                                                     | 3.32751000  | -0.80195400 | -0.36566900 |
| H | 1.57909100  | -1.38598500 | 4.31566700  | C                                                                                     | 3.56826900  | -0.86376800 | 1.01612800  |
| H | 2.00026600  | 0.16584700  | 5.03512100  | C                                                                                     | 2.65225900  | -0.30008100 | 1.90082200  |
| H | 1.17274200  | 0.44561300  | 2.68056000  | C                                                                                     | 1.48955300  | 0.32324400  | 1.42404300  |
| H | 2.82747500  | 1.00513100  | 2.86539200  | H                                                                                     | 1.99238000  | -0.14496100 | -1.93063200 |
| H | 1.96697200  | -1.72902600 | 1.82276200  | H                                                                                     | 4.04944300  | -1.22065600 | -1.06270700 |
| H | 4.38107900  | -2.10383700 | 1.26613800  | H                                                                                     | 4.47970300  | -1.32135400 | 1.38961100  |
| H | 4.78255800  | -0.54860600 | 1.98446000  | H                                                                                     | 2.84791400  | -0.30604800 | 2.97022300  |
| H | 5.20320100  | -2.36814800 | 3.60867500  | H                                                                                     | 0.81781300  | 0.83211600  | 2.10741500  |
| H | 3.54760900  | -2.94447600 | 3.44316600  | H                                                                                     | 0.03214300  | -2.43314600 | -2.40349500 |
| H | 4.40876000  | -0.23578300 | 4.59681700  | H                                                                                     | 0.16453400  | -3.40728900 | -0.54702300 |
| H | 3.74582100  | -1.58795900 | 5.50962800  | H                                                                                     | -1.70214300 | -3.20062300 | -1.49129000 |
| H | -3.56535500 | -3.18913300 | -3.24377000 | H                                                                                     | -3.07889300 | -0.35374400 | 2.51274700  |
| H | -2.00007400 | -3.26340700 | -4.04713300 | H                                                                                     | -3.60908300 | 1.16505100  | 1.15009400  |
| H | -1.72606400 | -2.81260200 | -1.62276100 | H                                                                                     | -4.08346600 | -0.84019300 | 0.73612800  |
| H | -1.11152200 | -1.46680200 | -2.57414400 | <b>8<sub>H</sub><sup>†</sup> [Pd(PH<sub>3</sub>)<sub>2</sub>(Ph··Cl)]<sup>‡</sup></b> |             |             |             |
| H | -3.86325500 | -1.54184000 | -1.24435700 | Pd                                                                                    | 0.83114000  | 0.06682900  | -0.05557200 |
| H | -4.06852400 | 0.81615300  | -2.05055400 | P                                                                                     | 0.50667700  | 2.37948100  | -0.35742800 |
| H | -2.49277100 | 0.67823800  | -2.83365100 | P                                                                                     | 3.04901900  | -0.41488900 | 0.76075000  |
| H | -4.33207700 | 0.35031100  | -4.47122600 | Cl                                                                                    | -0.06872700 | -1.98447200 | -1.17537200 |
| H | -5.00227900 | -0.95925500 | -3.50256700 | C                                                                                     | -1.21746700 | -0.54498600 | -0.19067200 |
| H | -2.27436500 | -0.95610000 | -4.90314200 | C                                                                                     | -2.14938200 | 0.12007000  | -1.00781900 |
| H | -3.67741200 | -1.91637500 | -5.36831000 | C                                                                                     | -3.35666100 | 0.53212800  | -0.45210900 |
| H | -4.20782300 | 3.31717600  | 1.67552500  | C                                                                                     | -3.66638100 | 0.25271800  | 0.88759600  |
| H | -3.66560100 | 3.11897800  | 3.33687500  | C                                                                                     | -2.76143600 | -0.46738800 | 1.66567500  |
| H | -2.06684800 | 2.09915800  | 1.70033000  | C                                                                                     | -1.54569100 | -0.90655000 | 1.12587800  |
| H | -2.71508100 | 0.90553600  | 2.82095000  | H                                                                                     | -1.91351100 | 0.32262700  | -2.04752400 |
| H | -3.70349200 | 1.44949400  | -0.01102200 | H                                                                                     | -4.06621300 | 1.07471800  | -1.07237800 |
| H | -5.20865500 | -0.54158800 | 0.30154600  | H                                                                                     | -4.61762400 | 0.56953800  | 1.30493800  |
| H | -4.65055700 | -0.68359400 | 1.96513500  |                                                                                       |             |             |             |
| H | -6.80832500 | 0.52717500  | 1.88033000  |                                                                                       |             |             |             |

|   |             |             |             |
|---|-------------|-------------|-------------|
| H | -3.00544600 | -0.72295300 | 2.69392300  |
| H | -0.87122100 | -1.52472500 | 1.70961200  |
| H | -0.19148700 | 2.87135700  | -1.49241600 |
| H | -0.27246200 | 3.07887000  | 0.59921200  |
| H | 1.55730500  | 3.33453200  | -0.40873700 |
| H | 3.30168400  | -0.56435700 | 2.14978300  |
| H | 3.70906200  | -1.60619900 | 0.36306100  |
| H | 4.15252900  | 0.44362300  | 0.51705800  |

**8<sub>Ph</sub><sup>‡</sup> [Pd(PPh<sub>3</sub>)<sub>2</sub>(Ph...Br)]<sup>‡</sup>**

|    |             |             |             |
|----|-------------|-------------|-------------|
| Pd | -0.00723900 | -0.70713000 | -0.23264600 |
| Br | 0.32651400  | -2.60838000 | -2.05496200 |
| P  | -2.03178200 | 0.55287400  | -0.02590500 |
| P  | 2.22762900  | 0.28887000  | 0.09049900  |
| C  | -0.60608700 | -2.72685900 | 0.00291900  |
| C  | 0.28946500  | -3.19709400 | 0.97886500  |
| C  | -0.20847900 | -3.95282200 | 2.04952100  |
| C  | -1.94910700 | -3.13782500 | 0.00489500  |
| C  | -1.98912000 | 2.29757900  | -0.65979000 |
| C  | -3.50871400 | -0.13182100 | -0.90910000 |
| C  | -2.63438400 | 0.77268100  | 1.71420800  |
| C  | 3.65568200  | -0.88300700 | -0.06806900 |
| C  | 2.57557600  | 1.09415900  | 1.72006400  |
| C  | 2.61151200  | 1.59431300  | -1.16882300 |
| C  | -0.82765200 | 3.05798100  | -0.44888800 |
| C  | -3.06525300 | 2.89226900  | -1.33854100 |
| C  | -2.97996000 | 4.21145000  | -1.79022300 |
| C  | -1.82144900 | 4.95767500  | -1.56877700 |
| C  | -0.74523600 | 4.37713700  | -0.89434500 |
| C  | 2.10423600  | 1.40036100  | -2.46587700 |
| C  | 3.34608300  | 2.75876700  | -0.89978400 |
| C  | 3.57467800  | 3.70118000  | -1.90528500 |
| C  | 3.08166900  | 3.49032600  | -3.19422200 |
| C  | 2.34774200  | 2.33544400  | -3.47287800 |
| C  | 3.93124300  | -1.76396900 | 0.99336300  |
| C  | 4.40285000  | -1.00166600 | -1.24849400 |
| C  | 5.40210300  | -1.97171400 | -1.36281600 |
| C  | 5.67133600  | -2.83648700 | -0.30212000 |
| C  | 4.93264700  | -2.72734200 | 0.87905500  |
| C  | 1.48961500  | 1.41679900  | 2.54791800  |
| C  | 3.87584800  | 1.38877700  | 2.16765700  |
| C  | 4.07866400  | 2.00882400  | 3.40077900  |
| C  | 2.98706900  | 2.33895000  | 4.20912100  |
| C  | 1.69315500  | 2.03899000  | 3.78233700  |
| C  | -3.35215300 | 1.90109200  | 2.14213200  |
| C  | -2.34367200 | -0.23714000 | 2.64734100  |
| C  | -2.77175500 | -0.12541400 | 3.97143600  |
| C  | -3.77213900 | 2.01455900  | 3.46919100  |
| C  | -3.48504100 | 1.00132300  | 4.38618300  |
| C  | -4.77287200 | -0.27885900 | -0.32046700 |
| C  | -3.32788300 | -0.55944400 | -2.23669400 |
| C  | -4.38858400 | -1.10442500 | -2.95993400 |
| C  | -5.83211200 | -0.83619400 | -1.04316800 |
| C  | -5.64467300 | -1.24738400 | -2.36309500 |
| C  | -2.41763700 | -3.90371000 | 1.06988700  |
| C  | -1.55702800 | -4.30302100 | 2.10278600  |
| H  | 1.35181900  | -2.99893500 | 0.89063200  |

|   |             |             |             |
|---|-------------|-------------|-------------|
| H | 0.47843400  | -4.29595700 | 2.81957200  |
| H | -2.61365100 | -2.83714000 | -0.79581600 |
| H | 0.02269900  | 2.61231600  | 0.05721600  |
| H | -3.97300900 | 2.32516400  | -1.51787300 |
| H | -3.82215400 | 4.65373300  | -2.31639000 |
| H | -1.75542100 | 5.98261800  | -1.92434300 |
| H | 0.16725600  | 4.94305200  | -0.72752000 |
| H | 1.50728800  | 0.51721600  | -2.68046400 |
| H | 3.73566700  | 2.93990100  | 0.09658700  |
| H | 4.14198600  | 4.60050100  | -1.67885700 |
| H | 3.26210700  | 4.22469100  | -3.97483400 |
| H | 1.95149400  | 2.16649700  | -4.47063900 |
| H | 3.36870400  | -1.68685700 | 1.92054900  |
| H | 4.21094200  | -0.33451600 | -2.08248400 |
| H | 5.97179300  | -2.04622700 | -2.28547300 |
| H | 6.44907800  | -3.58985400 | -0.39320800 |
| H | 5.13567200  | -3.39363100 | 1.71358400  |
| H | 0.48255600  | 1.16351800  | 2.22793800  |
| H | 4.73208000  | 1.12133600  | 1.55510000  |
| H | 5.08968800  | 2.23047500  | 3.73284000  |
| H | 3.14771800  | 2.81886200  | 5.17099200  |
| H | 0.83912200  | 2.27785300  | 4.41040700  |
| H | -3.58019100 | 2.69645600  | 1.43918800  |
| H | -1.77714700 | -1.10997800 | 2.33588700  |
| H | -2.53958400 | -0.91697400 | 4.67908200  |
| H | -4.32342800 | 2.89651800  | 3.78534500  |
| H | -3.81147500 | 1.09171400  | 5.41900900  |
| H | -4.93555800 | 0.04021900  | 0.70415000  |
| H | -2.34630600 | -0.48188700 | -2.69789100 |
| H | -4.22994900 | -1.42954300 | -3.98470700 |
| H | -6.80470900 | -0.94675500 | -0.57027900 |
| H | -6.46881200 | -1.68192100 | -2.92261200 |
| H | -3.46576800 | -4.19218700 | 1.09162600  |
| H | -1.93269500 | -4.91176300 | 2.92053000  |

**8<sub>Ph</sub><sup>‡</sup> [Pd(PPh<sub>3</sub>)<sub>2</sub>(Ph...Cl)]<sup>‡</sup>**

|    |             |             |             |
|----|-------------|-------------|-------------|
| Pd | -0.03868600 | -0.87758400 | -0.47145000 |
| P  | 2.23751400  | -0.03484700 | -0.01993600 |
| P  | -1.87690200 | 0.58096000  | -0.04869100 |
| Cl | 0.16472100  | -2.61209500 | -2.31562800 |
| C  | -1.01933600 | -2.77110800 | -0.58886300 |
| C  | -0.38886300 | -3.49225600 | 0.44162300  |
| C  | -1.16464500 | -4.28685000 | 1.29607200  |
| C  | -2.38487500 | -2.97265800 | -0.86092000 |
| C  | 3.64633200  | -0.93855600 | -0.81849400 |
| C  | 2.70113200  | -0.08048500 | 1.77336000  |
| C  | 2.57206400  | 1.71270400  | -0.53037100 |
| C  | -1.55981700 | 2.40703200  | -0.12372900 |
| C  | -2.70795300 | 0.42524200  | 1.60115000  |
| C  | -3.25919700 | 0.37284900  | -1.26437700 |
| C  | 3.55519100  | -2.33523900 | -0.92909900 |
| C  | 4.79557200  | -0.29847700 | -1.30985500 |
| C  | 5.83152600  | -1.04025000 | -1.88205700 |
| C  | 5.73563400  | -2.42995300 | -1.97166200 |
| C  | 4.59381000  | -3.07584500 | -1.49361600 |
| C  | -2.53415700 | -4.43277300 | 1.07914100  |
| C  | -3.13196800 | -3.78160300 | -0.01095900 |

|   |             |             |             |                                                                                                       |             |             |             |
|---|-------------|-------------|-------------|-------------------------------------------------------------------------------------------------------|-------------|-------------|-------------|
| C | 1.66774300  | -0.07855700 | 2.72435500  | H                                                                                                     | 4.03467000  | 4.65088400  | 0.40072800  |
| C | 4.03095300  | -0.12994300 | 2.22296700  | H                                                                                                     | 3.19581100  | 5.33222000  | -1.83932400 |
| C | 4.31770600  | -0.15811900 | 3.58885200  | H                                                                                                     | 1.94466500  | 3.69621700  | -3.23744400 |
| C | 3.28140300  | -0.14003400 | 4.52555500  | <i>t</i> - <b>9</b> <sub>Cy</sub> [Pd(PCy <sub>3</sub> ) <sub>2</sub> (Ph)(Br)] (conformer <b>F</b> ) |             |             |             |
| C | 1.95562100  | -0.10181400 | 4.09063200  | Pd                                                                                                    | -0.00464900 | -0.08026700 | -0.12656000 |
| C | -3.41917600 | 1.48148300  | 2.19563300  | Br                                                                                                    | -0.02451500 | -2.58295700 | -0.85161600 |
| C | -4.02620000 | 1.31616800  | 3.44163300  | P                                                                                                     | -2.44755400 | 0.03114500  | -0.23274700 |
| C | -3.93179600 | 0.09435700  | 4.11231700  | P                                                                                                     | 2.39608400  | -0.22944700 | 0.21930400  |
| C | -3.22642800 | -0.96059500 | 3.53129700  | C                                                                                                     | -2.91482400 | 0.34563700  | -4.42395800 |
| C | -2.61478600 | -0.79638800 | 2.28652900  | C                                                                                                     | -2.35911800 | -0.07237200 | -3.05264500 |
| C | -2.90858700 | 0.18064600  | -2.61235900 | C                                                                                                     | -3.08058500 | 0.66011900  | -1.89879100 |
| C | -3.89180500 | 0.01628000  | -3.58831300 | C                                                                                                     | -3.00065900 | 2.18826600  | -2.09720200 |
| C | -5.24240000 | 0.02069600  | -3.22927600 | C                                                                                                     | -3.56027300 | 2.59763900  | -3.47194200 |
| C | -5.60087000 | 0.19560500  | -1.89182300 | C                                                                                                     | -2.85134200 | 1.86646100  | -4.62021900 |
| C | -4.61725300 | 0.37462600  | -0.91528500 | H                                                                                                     | -3.96014400 | 0.01257000  | -4.51053800 |
| C | -0.56125000 | 2.93779600  | 0.71048700  | H                                                                                                     | -2.35769700 | -0.16787700 | -5.21781800 |
| C | -2.26170400 | 3.27941800  | -0.96888800 | H                                                                                                     | -2.43559700 | -1.15891300 | -2.93410200 |
| C | -1.97263500 | 4.64708100  | -0.97662400 | H                                                                                                     | -1.28631400 | 0.15969700  | -3.00219800 |
| C | -0.98562600 | 5.16279700  | -0.13708200 | H                                                                                                     | -4.14387500 | 0.38906000  | -1.93802000 |
| C | -0.28143500 | 4.30281400  | 0.70978400  | H                                                                                                     | -3.55772600 | 2.71307600  | -1.31385700 |
| C | 2.09177900  | 2.11285900  | -1.78906000 | H                                                                                                     | -1.96238000 | 2.52155800  | -2.01151900 |
| C | 3.27082200  | 2.64296900  | 0.25228800  | H                                                                                                     | -4.63638900 | 2.36975200  | -3.50896500 |
| C | 3.49120000  | 3.94080700  | -0.21774500 | H                                                                                                     | -3.46836300 | 3.68456400  | -3.59439300 |
| C | 3.02203300  | 4.32308900  | -1.47510900 | H                                                                                                     | -1.79816900 | 2.18281200  | -4.65613700 |
| C | 2.32171700  | 3.40424800  | -2.26094800 | H                                                                                                     | -3.29561800 | 2.14756100  | -5.58367400 |
| H | 0.68744100  | -3.44190600 | 0.56915800  | C                                                                                                     | -5.14746000 | -3.30478500 | -0.55536400 |
| H | -0.67749600 | -4.81810300 | 2.11036000  | C                                                                                                     | -4.73917200 | -1.81868200 | -0.51766900 |
| H | -2.84802500 | -2.48303500 | -1.70957800 | C                                                                                                     | -3.25752700 | -1.67632100 | -0.10262100 |
| H | 2.65728000  | -2.84283200 | -0.59167000 | C                                                                                                     | -3.02576600 | -2.35094100 | 1.26788200  |
| H | 4.88396300  | 0.78176800  | -1.25014000 | C                                                                                                     | -3.42778300 | -3.83517900 | 1.22400700  |
| H | 6.71366500  | -0.52862400 | -2.25864300 | C                                                                                                     | -4.88823200 | -4.00699600 | 0.78391500  |
| H | 6.54145200  | -3.00510600 | -2.42006500 | H                                                                                                     | -4.57669300 | -3.81155400 | -1.34681500 |
| H | 4.50221000  | -4.15571700 | -1.57340400 | H                                                                                                     | -6.20699400 | -3.38580000 | -0.83192400 |
| H | -3.12748400 | -5.07308000 | 1.72563800  | H                                                                                                     | -5.38944500 | -1.28825700 | 0.18956400  |
| H | -4.19511100 | -3.90640200 | -0.20201800 | H                                                                                                     | -4.92344800 | -1.38194600 | -1.50490200 |
| H | 0.63448500  | -0.07752900 | 2.38656400  | H                                                                                                     | -2.65673200 | -2.24493600 | -0.82294300 |
| H | 4.84446900  | -0.15558400 | 1.50407400  | H                                                                                                     | -1.97396900 | -2.26150600 | 1.55794700  |
| H | 5.35196000  | -0.19859900 | 3.92093600  | H                                                                                                     | -3.62780700 | -1.85057300 | 2.03757200  |
| H | 3.50711000  | -0.16515000 | 5.58843600  | H                                                                                                     | -2.76335400 | -4.36190100 | 0.52564600  |
| H | 1.14250800  | -0.10101700 | 4.81180500  | H                                                                                                     | -3.27137600 | -4.28824500 | 2.21176800  |
| H | -3.49334000 | 2.43798000  | 1.68699400  | H                                                                                                     | -5.55186300 | -3.57880900 | 1.55070900  |
| H | -4.57079100 | 2.14379000  | 3.88903200  | H                                                                                                     | -5.14407000 | -5.07177900 | 0.70933600  |
| H | -4.40266200 | -0.03189900 | 5.08384600  | C                                                                                                     | -3.24299500 | 2.06356200  | 3.40814400  |
| H | -3.14546600 | -1.91467100 | 4.04539800  | C                                                                                                     | -2.84079000 | 0.89662900  | 2.48956500  |
| H | -2.06072500 | -1.61950300 | 1.84800900  | C                                                                                                     | -3.22406000 | 1.20321800  | 1.02400900  |
| H | -1.85810800 | 0.13878700  | -2.89103900 | C                                                                                                     | -4.75049700 | 1.42687900  | 0.93906200  |
| H | -3.60174000 | -0.13147400 | -4.62518700 | C                                                                                                     | -5.17464700 | 2.59598200  | 1.84795200  |
| H | -6.00919700 | -0.11946500 | -3.98659400 | C                                                                                                     | -4.74559300 | 2.36726100  | 3.30508200  |
| H | -6.64907600 | 0.19329600  | -1.60371200 | H                                                                                                     | -2.66672400 | 2.95622700  | 3.12632600  |
| H | -4.91193500 | 0.51029600  | 0.12047300  | H                                                                                                     | -2.97514800 | 1.82924700  | 4.44675300  |
| H | 0.00204800  | 2.27775900  | 1.36413100  | H                                                                                                     | -3.35784700 | -0.00977700 | 2.82501100  |
| H | -3.04028200 | 2.89613100  | -1.61977500 | H                                                                                                     | -1.76908300 | 0.69404300  | 2.57572000  |
| H | -2.52689400 | 5.30781200  | -1.63850400 | H                                                                                                     | -2.73320000 | 2.15249400  | 0.76763700  |
| H | -0.76297400 | 6.22657700  | -0.14347500 | H                                                                                                     | -5.07462200 | 1.62263600  | -0.08890400 |
| H | 0.49737400  | 4.69193000  | 1.35939700  | H                                                                                                     | -5.27277400 | 0.51848800  | 1.26461900  |
| H | 1.52798500  | 1.40835100  | -2.39606500 | H                                                                                                     | -4.71921800 | 3.52474800  | 1.47400000  |
| H | 3.64543000  | 2.35829100  | 1.23046100  |                                                                                                       |             |             |             |

|   |             |             |             |                                                                                 |             |             |             |
|---|-------------|-------------|-------------|---------------------------------------------------------------------------------|-------------|-------------|-------------|
| H | -6.26198100 | 2.73516800  | 1.78946700  | C                                                                               | 0.14728900  | 3.93876900  | 1.58792300  |
| H | -5.31281000 | 1.51939200  | 3.71733100  | H                                                                               | -0.05767900 | 1.94832600  | 2.34654000  |
| H | -5.00172300 | 3.24104700  | 3.91777500  | C                                                                               | 0.36397100  | 4.15844700  | -0.79705600 |
| C | 2.69975600  | -3.10009500 | 3.36817600  | H                                                                               | 0.32222000  | 2.33641300  | -1.92503800 |
| C | 2.37380400  | -2.52352900 | 1.97871600  | C                                                                               | 0.30355200  | 4.75351700  | 0.46507600  |
| C | 2.73394100  | -1.02519200 | 1.90057300  | H                                                                               | 0.10777300  | 4.38109400  | 2.58146100  |
| C | 2.01269600  | -0.24854300 | 3.02487400  | H                                                                               | 0.49317800  | 4.77435900  | -1.68480700 |
| C | 2.33392200  | -0.82739900 | 4.41341200  | H                                                                               | 0.38090200  | 5.83248300  | 0.57125100  |
| C | 1.99831700  | -2.32278200 | 4.49018300  | <i>t</i> - <b>9</b> <sub>Cy</sub> [Pd(PCy <sub>3</sub> ) <sub>2</sub> (Ph)(Cl)] |             |             |             |
| H | 3.78777500  | -3.06775000 | 3.53237500  | Pd                                                                              | -0.00337300 | -0.15450800 | 0.04750600  |
| H | 2.41148500  | -4.15843000 | 3.39902200  | P                                                                               | 2.40180400  | -0.18145900 | 0.25849200  |
| H | 1.30929900  | -2.65944300 | 1.75822200  | P                                                                               | -2.39968700 | -0.19637400 | -0.24027600 |
| H | 2.91683300  | -3.09303700 | 1.21697300  | Cl                                                                              | -0.01339500 | -2.61103200 | 0.12419600  |
| H | 3.81660000  | -0.94073100 | 2.06664400  | C                                                                               | 3.13434100  | -2.36322500 | 3.85686600  |
| H | 2.27386800  | 0.81614800  | 2.99787700  | C                                                                               | 2.65483700  | -2.08037200 | 2.42178600  |
| H | 0.93001500  | -0.30736900 | 2.84637900  | C                                                                               | 2.95338900  | -0.62249500 | 2.01160300  |
| H | 3.40327200  | -0.68267000 | 4.62914800  | C                                                                               | 2.32970400  | 0.35576700  | 3.03206300  |
| H | 1.78327000  | -0.26941900 | 5.18199600  | C                                                                               | 2.80538500  | 0.06728700  | 4.46607700  |
| H | 0.91017800  | -2.45395300 | 4.39584900  | C                                                                               | 2.52210400  | -1.38570200 | 4.86901200  |
| H | 2.27960500  | -2.72723700 | 5.47098600  | H                                                                               | 4.23161100  | -2.28593100 | 3.89967300  |
| C | 4.19323600  | 3.44737400  | -0.95855200 | H                                                                               | 2.88435600  | -3.39736100 | 4.12578800  |
| C | 3.64611700  | 2.01465800  | -1.07405700 | H                                                                               | 3.14341100  | -2.78179800 | 1.73671300  |
| C | 3.34646500  | 1.41416400  | 0.31869300  | H                                                                               | 1.57989900  | -2.27462400 | 2.33912400  |
| C | 4.62840700  | 1.44112400  | 1.18300200  | H                                                                               | 4.04413800  | -0.49176300 | 2.03370200  |
| C | 5.18895600  | 2.87202800  | 1.29283400  | H                                                                               | 2.55621400  | 1.39611500  | 2.76873200  |
| C | 5.45261800  | 3.49673600  | -0.08355100 | H                                                                               | 1.23680800  | 0.25386200  | 2.98488600  |
| H | 3.41664000  | 4.09446900  | -0.52812800 | H                                                                               | 3.88632500  | 0.26121900  | 4.53731600  |
| H | 4.41023200  | 3.83908400  | -1.96105200 | H                                                                               | 2.31800900  | 0.76208000  | 5.16244900  |
| H | 4.39330100  | 1.39624000  | -1.58696200 | H                                                                               | 1.43428500  | -1.54315800 | 4.91188900  |
| H | 2.74618700  | 2.01112500  | -1.69609500 | H                                                                               | 2.90853100  | -1.58479900 | 5.87689100  |
| H | 2.61754200  | 2.07848800  | 0.79937200  | C                                                                               | 5.08557500  | -2.99943600 | -1.51401500 |
| H | 4.43109200  | 1.06840100  | 2.19263600  | C                                                                               | 4.66328600  | -1.71318000 | -0.77886500 |
| H | 5.39393200  | 0.78600900  | 0.74816900  | C                                                                               | 3.12938100  | -1.54899800 | -0.80773900 |
| H | 4.46767600  | 3.49615900  | 1.84052700  | C                                                                               | 2.60200000  | -1.54855000 | -2.26018300 |
| H | 6.10933000  | 2.85915600  | 1.89118400  | C                                                                               | 3.02761600  | -2.83582000 | -2.98721500 |
| H | 6.26373300  | 2.94551000  | -0.58279800 | C                                                                               | 4.55043400  | -3.03242200 | -2.95352000 |
| H | 5.80147000  | 4.53131200  | 0.02890500  | H                                                                               | 4.69945600  | -3.86962600 | -0.96351400 |
| C | 5.31670200  | -2.66924900 | -1.72774000 | H                                                                               | 6.18005400  | -3.08612600 | -1.51002800 |
| C | 4.78287900  | -1.56004100 | -0.80175200 | H                                                                               | 5.14318900  | -0.85371800 | -1.26613400 |
| C | 3.26502100  | -1.36547000 | -1.00581000 | H                                                                               | 5.03696100  | -1.74004200 | 0.25210800  |
| C | 2.94074600  | -1.05266700 | -2.48445800 | H                                                                               | 2.68086100  | -2.43272000 | -0.33666300 |
| C | 3.47929100  | -2.16527600 | -3.40030000 | H                                                                               | 1.51000500  | -1.47115300 | -2.25088600 |
| C | 4.98563400  | -2.38840800 | -3.20075500 | H                                                                               | 2.98911500  | -0.68184100 | -2.80991900 |
| H | 4.86823400  | -3.62884200 | -1.43222700 | H                                                                               | 2.53525200  | -3.69300100 | -2.50695500 |
| H | 6.40108900  | -2.77453300 | -1.59155000 | H                                                                               | 2.67159500  | -2.80964800 | -4.02540300 |
| H | 5.31573000  | -0.62583800 | -1.02268500 | H                                                                               | 5.03272100  | -2.23287100 | -3.53624300 |
| H | 5.01072900  | -1.81299700 | 0.24099700  | H                                                                               | 4.82456200  | -3.97894900 | -3.43687300 |
| H | 2.76946900  | -2.32070400 | -0.79491100 | C                                                                               | 3.89634300  | 3.20618500  | -1.83374400 |
| H | 1.85689700  | -0.96535200 | -2.60928600 | C                                                                               | 3.38120700  | 1.77641600  | -1.59601700 |
| H | 3.38729300  | -0.09698700 | -2.78350200 | C                                                                               | 3.29740900  | 1.45465100  | -0.08655400 |
| H | 2.93704100  | -3.09641600 | -3.18381200 | C                                                                               | 4.68266900  | 1.65329700  | 0.56861300  |
| H | 3.26765800  | -1.91529800 | -4.44804400 | C                                                                               | 5.21297000  | 3.07859800  | 0.32100800  |
| H | 5.53315200  | -1.49193500 | -3.52949800 | C                                                                               | 5.26355100  | 3.42527700  | -1.17277900 |
| H | 5.33641300  | -3.21592900 | -3.83078900 | H                                                                               | 3.16810200  | 3.92135400  | -1.42666400 |
| C | 0.09182600  | 1.92654500  | 0.18668500  | H                                                                               | 3.95912800  | 3.39981300  | -2.91262000 |
| C | 0.04636200  | 2.54836000  | 1.44762900  | H                                                                               | 4.06758100  | 1.07172800  | -2.08301200 |
| C | 0.26209000  | 2.76857900  | -0.92892200 |                                                                                 |             |             |             |

|   |             |             |             |
|---|-------------|-------------|-------------|
| H | 2.40310600  | 1.65130900  | -2.07046200 |
| H | 2.61539300  | 2.19120700  | 0.35867000  |
| H | 4.63368700  | 1.48410500  | 1.64856200  |
| H | 5.39878100  | 0.92529400  | 0.16606700  |
| H | 4.55805200  | 3.79642900  | 0.83639700  |
| H | 6.20787900  | 3.18276800  | 0.77331500  |
| H | 6.01237800  | 2.78866200  | -1.66771800 |
| H | 5.59498200  | 4.46241900  | -1.31116700 |
| C | -3.03411600 | -2.57172900 | -3.73611100 |
| C | -2.59245300 | -2.21526700 | -2.30508600 |
| C | -2.89070200 | -0.73524800 | -1.98387300 |
| C | -2.22913000 | 0.18122500  | -3.03676500 |
| C | -2.67066800 | -0.17896200 | -4.46511800 |
| C | -2.38861100 | -1.65341000 | -4.78256300 |
| H | -4.12930600 | -2.49140400 | -3.81249300 |
| H | -2.78391300 | -3.62013600 | -3.94224700 |
| H | -1.52206200 | -2.41192600 | -2.18026800 |
| H | -3.10645300 | -2.87461700 | -1.59765300 |
| H | -3.97906400 | -0.59739700 | -2.04622600 |
| H | -2.45166300 | 1.23598000  | -2.83525500 |
| H | -1.13894600 | 0.07126500  | -2.95579200 |
| H | -3.74786800 | 0.01810400  | -4.57373200 |
| H | -2.16027100 | 0.47422400  | -5.18485700 |
| H | -1.30119200 | -1.81954100 | -4.78804200 |
| H | -2.75014200 | -1.90410300 | -5.78813500 |
| C | -3.90051500 | 3.33039400  | 1.58634300  |
| C | -3.40508300 | 1.88066900  | 1.45450900  |
| C | -3.29452000 | 1.46113900  | -0.02810500 |
| C | -4.66304700 | 1.63280900  | -0.72616800 |
| C | -5.17349800 | 3.07999100  | -0.58604800 |
| C | -5.24879900 | 3.52711000  | 0.88020400  |
| H | -3.15072300 | 4.00572200  | 1.15132000  |
| H | -3.98483600 | 3.59578500  | 2.64837000  |
| H | -4.11291800 | 1.21933300  | 1.97052000  |
| H | -2.43812200 | 1.77199700  | 1.95524400  |
| H | -2.59509300 | 2.16185500  | -0.50253800 |
| H | -4.59506900 | 1.38729300  | -1.79080300 |
| H | -5.39959200 | 0.94570800  | -0.29007700 |
| H | -4.49562800 | 3.75105300  | -1.13371200 |
| H | -6.15701000 | 3.16961700  | -1.06555700 |
| H | -6.01952300 | 2.93786100  | 1.39962800  |
| H | -5.56452400 | 4.57652900  | 0.94112900  |
| C | -5.18252600 | -2.87782700 | 1.59210000  |
| C | -4.71446400 | -1.64554000 | 0.79489200  |
| C | -3.18112500 | -1.49331000 | 0.87669000  |
| C | -2.71341900 | -1.40769800 | 2.34737300  |
| C | -3.18537800 | -2.64158500 | 3.13580300  |
| C | -4.70788000 | -2.82321500 | 3.05184600  |
| H | -4.78433100 | -3.78524400 | 1.11517300  |
| H | -6.27687200 | -2.95426000 | 1.54727100  |
| H | -5.20320900 | -0.75153000 | 1.20515400  |
| H | -5.04603500 | -1.73477900 | -0.24703500 |
| H | -2.72337400 | -2.40786600 | 0.47899800  |
| H | -1.62116200 | -1.34326700 | 2.37983200  |
| H | -3.11103400 | -0.50437200 | 2.82636500  |
| H | -2.68553800 | -3.53342700 | 2.73230100  |
| H | -2.87115600 | -2.55270600 | 4.18397900  |

|   |             |             |             |
|---|-------------|-------------|-------------|
| H | -5.20246000 | -1.98188900 | 3.56077000  |
| H | -5.01466000 | -3.73307100 | 3.58362000  |
| C | 0.00049000  | 1.87282500  | -0.00571000 |
| C | -0.01218100 | 2.58422800  | -1.22087200 |
| C | 0.01854800  | 2.63660600  | 1.17716800  |
| C | -0.00665000 | 3.98417400  | -1.25486500 |
| H | -0.02987000 | 2.04244100  | -2.16287800 |
| C | 0.02224900  | 4.03667600  | 1.15029400  |
| H | 0.03232300  | 2.13654400  | 2.14224500  |
| C | 0.01023000  | 4.71979400  | -0.06782600 |
| H | -0.01616100 | 4.49818300  | -2.21412700 |
| H | 0.03452000  | 4.59192700  | 2.08621900  |
| H | 0.01391500  | 5.80653100  | -0.09164300 |

*c*-**9<sub>H</sub>** [Pd(PH<sub>3</sub>)<sub>2</sub>(Ph)(Br)]

|    |             |             |             |
|----|-------------|-------------|-------------|
| Pd | 0.60195400  | 0.43210200  | 0.00019400  |
| Br | 0.98043100  | -2.03936600 | -0.00017200 |
| P  | -0.03434000 | 2.61794000  | -0.00052300 |
| P  | 3.01630900  | 0.55305900  | 0.00022100  |
| C  | -1.41519800 | 0.10388000  | 0.00013100  |
| C  | -2.11097500 | -0.02918800 | -1.20868400 |
| C  | -2.11117600 | -0.02875300 | 1.20891900  |
| C  | -3.48301000 | -0.30460600 | -1.20629100 |
| H  | -1.58685300 | 0.05593900  | -2.15759300 |
| C  | -3.48317200 | -0.30417700 | 1.20642600  |
| H  | -1.58714700 | 0.05675400  | 2.15784800  |
| C  | -4.17207700 | -0.44160500 | 0.00002700  |
| H  | -4.00861800 | -0.41717600 | -2.15178700 |
| H  | -4.00897400 | -0.41639600 | 2.15185500  |
| H  | -5.23721800 | -0.65770600 | 0.00001500  |
| H  | 0.91120900  | 3.67353900  | 0.00035600  |
| H  | -0.84159000 | 3.05871900  | 1.06917400  |
| H  | -0.83933800 | 3.05844000  | -1.07202300 |
| H  | 3.78856500  | 1.74655100  | 0.00009300  |
| H  | 3.66454600  | -0.09800700 | -1.06919100 |
| H  | 3.66458700  | -0.09784200 | 1.06971300  |

*c*-**9<sub>H</sub>** [Pd(PH<sub>3</sub>)<sub>2</sub>(Ph)(Cl)]

|    |             |             |             |
|----|-------------|-------------|-------------|
| Pd | -0.73796500 | 0.08268000  | -0.00001900 |
| P  | -0.35918200 | 2.31705500  | 0.00025100  |
| P  | -3.15212000 | -0.10326500 | -0.00013300 |
| Cl | -0.84865300 | -2.28159200 | -0.00031900 |
| C  | 1.29952800  | -0.01684200 | 0.00006100  |
| C  | 2.00426900  | -0.08089000 | 1.20897000  |
| C  | 2.00440500  | -0.08005900 | -1.20880900 |
| C  | 3.39675000  | -0.21908600 | 1.20656400  |
| H  | 1.47337900  | -0.04786100 | 2.15738100  |
| C  | 3.39688300  | -0.21826000 | -1.20633800 |
| H  | 1.47362200  | -0.04637900 | -2.15725700 |
| C  | 4.09581700  | -0.28654600 | 0.00013000  |
| H  | 3.93131600  | -0.27874500 | 2.15188200  |
| H  | 3.93155300  | -0.27727800 | -2.15163700 |
| H  | 5.17726600  | -0.39502600 | 0.00015400  |
| H  | -1.42264800 | 3.25340200  | 0.00072600  |
| H  | 0.38837300  | 2.85179200  | -1.07005700 |
| H  | 0.38889700  | 2.85137600  | 1.07041200  |
| H  | -4.09263300 | 0.96221100  | -0.00009300 |



|                                                                                |             |             |             |   |             |             |             |
|--------------------------------------------------------------------------------|-------------|-------------|-------------|---|-------------|-------------|-------------|
| H                                                                              | -3.69603300 | -0.84333000 | 1.06942400  | C | -2.28345100 | 1.75803900  | -0.07960300 |
| H                                                                              | -3.69594200 | -0.84315800 | -1.06985800 | C | -2.84189100 | -0.46969000 | 1.64838000  |
| <i>t</i> - <b>9<sub>H</sub></b> [Pd(PH <sub>3</sub> ) <sub>2</sub> (Ph)(Br)]   |             |             |             | C | -3.12657200 | -0.71873600 | -1.27200400 |
| Pd                                                                             | -0.32653100 | 0.00003300  | -0.00006400 | C | 4.30035400  | 0.11283900  | 0.58650100  |
| Br                                                                             | -2.88757500 | -0.00007500 | 0.00001000  | C | 4.01392200  | 1.13427500  | -1.58418500 |
| P                                                                              | -0.39049700 | 2.31731200  | 0.00007800  | C | 5.38610400  | 1.01084300  | -1.81851300 |
| P                                                                              | -0.39034700 | -2.31726000 | 0.00002500  | C | 6.21579000  | 0.43999300  | -0.85475000 |
| C                                                                              | 1.70702700  | 0.00001200  | -0.00004500 | C | 5.66758800  | -0.00835600 | 0.34954200  |
| C                                                                              | 2.42436500  | -0.00007000 | 1.20643300  | C | 0.84543500  | 1.15486300  | 2.65170300  |
| C                                                                              | 2.42444900  | 0.00008500  | -1.20647000 | C | 2.51061500  | 2.73142900  | 1.88613500  |
| C                                                                              | 3.82425900  | -0.00007200 | 1.20547800  | C | 2.52145100  | 3.32973300  | 3.14595600  |
| H                                                                              | 1.89594200  | -0.00013900 | 2.15771100  | C | 1.69633900  | 2.84133700  | 4.16286500  |
| C                                                                              | 3.82434300  | 0.00007300  | -1.20541600 | C | 0.86411100  | 1.74904400  | 3.91635200  |
| H                                                                              | 1.89609000  | 0.00015300  | -2.15778400 | C | -3.91525300 | 0.29707200  | 2.13708700  |
| C                                                                              | 4.52833900  | -0.00000300 | 0.00005600  | C | -4.53333900 | -0.02999600 | 3.34469400  |
| H                                                                              | 4.36154300  | -0.00013000 | 2.15129200  | C | -4.08828100 | -1.12547500 | 4.08752600  |
| H                                                                              | 4.36169400  | 0.00012300  | -2.15119100 | C | -3.02438600 | -1.89331100 | 3.61298700  |
| H                                                                              | 5.61512900  | -0.00000400 | 0.00009300  | C | -2.40443700 | -1.57043600 | 2.40348400  |
| H                                                                              | -1.07581800 | 2.92140500  | -1.07320000 | C | -2.57159600 | -1.09777400 | -2.50317500 |
| H                                                                              | 0.78559600  | 3.10024800  | -0.00046900 | C | -3.39045000 | -1.52811300 | -3.54815500 |
| H                                                                              | -1.07454400 | 2.92106200  | 1.07436600  | C | -4.77292500 | -1.60164600 | -3.36952400 |
| H                                                                              | -1.07479200 | -2.92122800 | -1.07388700 | C | -5.33270800 | -1.24124400 | -2.14220300 |
| H                                                                              | -1.07514900 | -2.92123500 | 1.07369700  | C | -4.51575400 | -0.79944000 | -1.10050800 |
| H                                                                              | 0.78581900  | -3.10008700 | 0.00020000  | C | -1.97130300 | 2.59370400  | 1.00710800  |
| <i>t</i> - <b>9<sub>H</sub></b> [Pd(PH <sub>3</sub> ) <sub>2</sub> (Ph)(Cl)]   |             |             |             | C | -2.78542900 | 2.34755600  | -1.24955400 |
| Pd                                                                             | -0.70931500 | 0.00000000  | -0.00003700 | C | -2.98365900 | 3.72817400  | -1.32470900 |
| P                                                                              | -0.78832600 | 2.31619000  | 0.00016500  | C | -2.68583700 | 4.54453300  | -0.23373600 |
| P                                                                              | -0.78832700 | -2.31619000 | -0.00001300 | C | -2.17484100 | 3.97139900  | 0.93278200  |
| Cl                                                                             | -3.13043100 | 0.00000000  | -0.00008500 | C | 0.75837300  | 1.51323400  | -2.55801200 |
| C                                                                              | 1.31905100  | 0.00000000  | -0.00000500 | C | 1.00210400  | 3.40449600  | -1.07399200 |
| C                                                                              | 2.03810700  | -0.00005100 | 1.20592800  | C | 0.64075400  | 4.26033400  | -2.11670500 |
| C                                                                              | 2.03811800  | 0.00005100  | -1.20593100 | C | 0.35326600  | 3.74905900  | -3.38269600 |
| C                                                                              | 3.43790600  | -0.00005100 | 1.20529000  | C | 0.41004300  | 2.37107800  | -3.60146000 |
| H                                                                              | 1.50979600  | -0.00009300 | 2.15731900  | C | 2.00672700  | -2.23917100 | -0.02835600 |
| C                                                                              | 3.43791700  | 0.00005000  | -1.20528000 | C | 2.44867200  | -2.75312300 | 1.19799500  |
| H                                                                              | 1.50981500  | 0.00009200  | -2.15732800 | C | 2.71364400  | -2.56668800 | -1.19116000 |
| C                                                                              | 4.14222100  | -0.00000100 | 0.00000800  | C | 3.58339500  | -3.57024000 | 1.26012800  |
| H                                                                              | 3.97515800  | -0.00009100 | 2.15116400  | C | 3.84538400  | -3.38618800 | -1.12882500 |
| H                                                                              | 3.97517800  | 0.00009000  | -2.15115000 | C | 4.28752500  | -3.88745100 | 0.09718200  |
| H                                                                              | 5.22904700  | -0.00000100 | 0.00001300  | H | 3.88944400  | -0.25418300 | 1.52059700  |
| H                                                                              | -1.48329100 | 2.90912300  | -1.07334000 | H | 3.38746500  | 1.58661300  | -2.34477500 |
| H                                                                              | 0.37450500  | 3.11814300  | 0.00003400  | H | 5.80203500  | 1.36672700  | -2.75745100 |
| H                                                                              | -1.48286200 | 2.90888500  | 1.07408200  | H | 7.28230700  | 0.34284200  | -1.03929600 |
| H                                                                              | -1.48299200 | -2.90903600 | -1.07376300 | H | 6.30331900  | -0.46179500 | 1.10481600  |
| H                                                                              | -1.48316700 | -2.90897000 | 1.07365900  | H | 0.20634800  | 0.29594900  | 2.46663600  |
| H                                                                              | 0.37450200  | -3.11814400 | 0.00010200  | H | 3.18236800  | 3.09709900  | 1.11514800  |
| <i>c</i> - <b>9<sub>Ph</sub></b> [Pd(PPh <sub>3</sub> ) <sub>2</sub> (Ph)(Br)] |             |             |             | H | 3.18387200  | 4.16969200  | 3.33716400  |
| Pd                                                                             | 0.30756100  | -1.12249500 | -0.08137700 | H | 1.71364400  | 3.30305300  | 5.14643700  |
| Br                                                                             | -0.83421100 | -3.35896500 | -0.34477700 | H | 0.23288200  | 1.35135100  | 4.70629400  |
| P                                                                              | 1.64049000  | 0.79995300  | -0.02138100 | H | -4.26485400 | 1.16189600  | 1.58263600  |
| P                                                                              | -1.99752600 | -0.07644600 | 0.04315600  | H | -5.36213900 | 0.57431300  | 3.70440900  |
| C                                                                              | 3.45540500  | 0.68583500  | -0.37913100 | H | -4.56906400 | -1.37832600 | 5.02894900  |
| C                                                                              | 1.65664700  | 1.64670000  | 1.61863800  | H | -2.67326400 | -2.75205200 | 4.17886900  |
| C                                                                              | 1.07347000  | 2.02162900  | -1.28578100 | H | -1.59873500 | -2.19292700 | 2.02962200  |
|                                                                                |             |             |             | H | -1.49409400 | -1.08633200 | -2.63346400 |
|                                                                                |             |             |             | H | -2.94429300 | -1.82659700 | -4.49295700 |
|                                                                                |             |             |             | H | -5.41010200 | -1.94852900 | -4.17872800 |

|   |             |             |             |
|---|-------------|-------------|-------------|
| H | -6.40697800 | -1.30762800 | -1.99134900 |
| H | -4.96457500 | -0.53124100 | -0.14969200 |
| H | -1.58685300 | 2.16806300  | 1.92774200  |
| H | -3.03809300 | 1.72819300  | -2.10334500 |
| H | -3.38142100 | 4.16145200  | -2.23867100 |
| H | -2.85163000 | 5.61722800  | -0.29006000 |
| H | -1.93841100 | 4.59477500  | 1.79135100  |
| H | 0.79155500  | 0.44003400  | -2.73012800 |
| H | 1.21407400  | 3.81959900  | -0.09504000 |
| H | 0.58269500  | 5.32999700  | -1.93484200 |
| H | 0.07784100  | 4.41928200  | -4.19252000 |
| H | 0.17810200  | 1.96157700  | -4.58097500 |
| H | 1.89984900  | -2.53931400 | 2.11249400  |
| H | 2.38072500  | -2.19704300 | -2.15809400 |
| H | 3.90730100  | -3.96675100 | 2.22036300  |
| H | 4.37786100  | -3.63547200 | -2.04421100 |
| H | 5.16588900  | -4.52631600 | 0.14416500  |

*c*-**9**<sub>Ph</sub> [Pd(PPh<sub>3</sub>)<sub>2</sub>(Ph)(Cl)]

|    |             |             |             |
|----|-------------|-------------|-------------|
| Pd | 0.32425100  | -1.25009200 | -0.16012600 |
| P  | 1.57574500  | 0.70230200  | 0.01225100  |
| P  | -2.02749500 | -0.30955200 | 0.00170200  |
| Cl | -0.71487700 | -3.37282400 | -0.48468500 |
| C  | 3.39669300  | 0.67488200  | -0.33238500 |
| C  | 1.54786400  | 1.46045300  | 1.69502900  |
| C  | 0.97418800  | 1.97040900  | -1.18898200 |
| C  | -2.39560900 | 1.51216800  | -0.03483600 |
| C  | -2.86050400 | -0.83479500 | 1.57475800  |
| C  | -3.11526500 | -0.94236300 | -1.35138000 |
| C  | 4.25229700  | 0.06299200  | 0.59947700  |
| C  | 3.94995700  | 1.22927700  | -1.49469600 |
| C  | 5.32786300  | 1.17043400  | -1.72149700 |
| C  | 6.16804700  | 0.55944500  | -0.79216200 |
| C  | 5.62490800  | 0.00591600  | 0.37007000  |
| C  | 0.73672300  | 0.89291100  | 2.68849000  |
| C  | 2.36659100  | 2.55286100  | 2.03153100  |
| C  | 2.34298900  | 3.08432800  | 3.32085400  |
| C  | 1.51797400  | 2.52080600  | 4.29819500  |
| C  | 0.72065000  | 1.42032700  | 3.98237500  |
| C  | -3.94728900 | -0.12989800 | 2.12300300  |
| C  | -4.55490500 | -0.56271700 | 3.30257500  |
| C  | -4.08719000 | -1.70486200 | 3.95559300  |
| C  | -3.01183100 | -2.41353500 | 3.41884100  |
| C  | -2.40079600 | -1.98500200 | 2.23821600  |
| C  | -2.52889000 | -1.30992000 | -2.57091100 |
| C  | -3.32156200 | -1.73141800 | -3.63974800 |
| C  | -4.70787600 | -1.80525600 | -3.49707500 |
| C  | -5.29925100 | -1.45574200 | -2.28113500 |
| C  | -4.50878200 | -1.02503400 | -1.21507900 |
| C  | -2.12514400 | 2.30983600  | 1.09101200  |
| C  | -2.90917700 | 2.13404800  | -1.18304600 |
| C  | -3.15956300 | 3.50805200  | -1.19892600 |
| C  | -2.90368200 | 4.28538300  | -0.06942400 |
| C  | -2.38195500 | 3.68062600  | 1.07613100  |
| C  | 0.67539400  | 1.52008300  | -2.48660700 |
| C  | 0.85939000  | 3.33704900  | -0.90448100 |
| C  | 0.47165500  | 4.23524700  | -1.90109600 |

|   |             |             |             |
|---|-------------|-------------|-------------|
| C | 0.20217900  | 3.78287500  | -3.19318500 |
| C | 0.30203100  | 2.42076400  | -3.48435500 |
| C | 2.05338500  | -2.31395100 | -0.17480300 |
| C | 2.50417400  | -2.90701600 | 1.01166700  |
| C | 2.76449800  | -2.54465400 | -1.35774500 |
| C | 3.65503000  | -3.70358800 | 1.01615000  |
| C | 3.91151700  | -3.34525300 | -1.35355200 |
| C | 4.36438900  | -3.92309400 | -0.16600100 |
| H | 3.84591000  | -0.38461100 | 1.49994500  |
| H | 3.31420500  | 1.71371000  | -2.22732000 |
| H | 5.73961900  | 1.60761400  | -2.62735400 |
| H | 7.23891900  | 0.51208900  | -0.97094000 |
| H | 6.26920400  | -0.47944400 | 1.09777400  |
| H | 0.12603200  | 0.02693900  | 2.44912800  |
| H | 3.03803500  | 2.97675800  | 1.29076000  |
| H | 2.97875700  | 3.93096900  | 3.56565000  |
| H | 1.50851500  | 2.93068800  | 5.30458400  |
| H | 0.09015700  | 0.96414700  | 4.74067400  |
| H | -4.31640600 | 0.76765400  | 1.63765200  |
| H | -5.39401400 | -0.00458400 | 3.70997300  |
| H | -4.56027400 | -2.04023100 | 4.87491700  |
| H | -2.64461200 | -3.30853800 | 3.91397900  |
| H | -1.58639200 | -2.56138100 | 1.81219600  |
| H | -1.44856100 | -1.29744000 | -2.67168700 |
| H | -2.85183900 | -2.02173500 | -4.57562700 |
| H | -5.32447000 | -2.14392600 | -4.32554500 |
| H | -6.37719900 | -1.52204800 | -2.15897600 |
| H | -4.98113600 | -0.76424100 | -0.27323000 |
| H | -1.73108900 | 1.85817700  | 1.99510900  |
| H | -3.12883300 | 1.54442500  | -2.06659300 |
| H | -3.56453800 | 3.96673900  | -2.09719600 |
| H | -3.10994100 | 5.35247300  | -0.08006200 |
| H | -2.17776400 | 4.27361100  | 1.96399200  |
| H | 0.73808000  | 0.45837800  | -2.71249000 |
| H | 1.05790300  | 3.70624200  | 0.09545400  |
| H | 0.37964000  | 5.29142700  | -1.66305100 |
| H | -0.09332200 | 4.48605200  | -3.96721000 |
| H | 0.08305600  | 2.05655500  | -4.48450700 |
| H | 1.95140100  | -2.76898900 | 1.93820200  |
| H | 2.42524600  | -2.11124100 | -2.29561900 |
| H | 3.98802200  | -4.16058400 | 1.94593300  |
| H | 4.44872200  | -3.51774600 | -2.28378300 |
| H | 5.25587500  | -4.54535500 | -0.16375200 |

*t*-**9**<sub>Ph</sub> [Pd(PPh<sub>3</sub>)<sub>2</sub>(Ph)(Br)]

|    |             |             |             |
|----|-------------|-------------|-------------|
| Pd | -0.00001300 | -0.09400400 | -0.00004800 |
| Br | 0.00005500  | -2.68567000 | -0.00003900 |
| P  | 2.39586600  | -0.10525900 | -0.02580300 |
| P  | -2.39587800 | -0.10532600 | 0.02577300  |
| C  | 3.29912400  | 1.44892900  | 0.41387700  |
| C  | 3.08424000  | -0.53264600 | -1.68682400 |
| C  | 3.12033100  | -1.33805400 | 1.13906600  |
| C  | -3.08414400 | -0.53261500 | 1.68685600  |
| C  | -3.12044200 | -1.33816900 | -1.13899000 |
| C  | -3.29909000 | 1.44886700  | -0.41397000 |
| C  | 3.25876500  | 2.54574800  | -0.46394800 |
| C  | 3.99380800  | 1.58114000  | 1.62506400  |

|   |             |             |             |                                                                                 |             |             |             |
|---|-------------|-------------|-------------|---------------------------------------------------------------------------------|-------------|-------------|-------------|
| C | 4.63197100  | 2.78102700  | 1.95042700  | H                                                                               | -4.48774100 | -1.52849800 | 5.18421700  |
| C | 4.58881900  | 3.86158600  | 1.07056500  | H                                                                               | -2.23839700 | -2.31709800 | 4.46683900  |
| C | 3.90074000  | 3.73897500  | -0.13933500 | H                                                                               | 1.56362800  | -1.01923700 | 2.59853100  |
| C | 2.32834200  | -1.33590500 | -2.55609300 | H                                                                               | 4.78636900  | -1.91507400 | -0.11010300 |
| C | 4.35623200  | -0.09746400 | -2.09703300 | H                                                                               | 5.73633300  | -3.48439800 | 1.54045100  |
| C | 4.85740800  | -0.45609900 | -3.34948400 | H                                                                               | 4.62743800  | -3.80914100 | 3.74261100  |
| C | 4.09730500  | -1.25244200 | -4.20820800 | H                                                                               | 2.54006800  | -2.56059500 | 4.26959700  |
| C | 2.83485700  | -1.69241100 | -3.80716800 | H                                                                               | -0.26856500 | 2.12761700  | -2.13874900 |
| C | -4.29423100 | -2.04548700 | -0.84803300 | H                                                                               | 0.26828300  | 2.12744700  | 2.13882800  |
| C | -4.83142000 | -2.93373700 | -1.78207700 | H                                                                               | -0.25613100 | 4.59103800  | -2.13614200 |
| C | -4.20864200 | -3.11655300 | -3.01749600 | H                                                                               | 0.25555900  | 4.59086800  | 2.13645100  |
| C | -3.03865500 | -2.41396700 | -3.31507200 | H                                                                               | -0.00035900 | 5.84713700  | 0.00021400  |
| C | -2.49231100 | -1.53799600 | -2.37757900 | <i>t</i> - <b>9</b> <sub>Ph</sub> [Pd(PPh <sub>3</sub> ) <sub>2</sub> (Ph)(Cl)] |             |             |             |
| C | -3.25913700 | 2.54557000  | 0.46401900  | Pd                                                                              | 0.00000200  | 0.18689500  | 0.00007900  |
| C | -3.90098200 | 3.73883300  | 0.13927600  | P                                                                               | -2.39154000 | 0.22097000  | -0.02696600 |
| C | -4.58851500 | 3.86160100  | -1.07091600 | P                                                                               | 2.39154000  | 0.22115100  | 0.02699100  |
| C | -4.63124200 | 2.78116400  | -1.95095000 | Cl                                                                              | 0.00006500  | 2.63484100  | 0.00075800  |
| C | -3.99320900 | 1.58124300  | -1.62546300 | C                                                                               | -3.31612000 | -1.32397400 | 0.39323000  |
| C | -2.32813800 | -1.33575300 | 2.55614200  | C                                                                               | -3.07379500 | 0.70027700  | -1.67719100 |
| C | -4.35615600 | -0.09751600 | 2.09709200  | C                                                                               | -3.09060800 | 1.45170800  | 1.15394200  |
| C | -4.85724300 | -0.45611000 | 3.34958900  | C                                                                               | 3.07393900  | 0.69965200  | 1.67737300  |
| C | -4.09703400 | -1.25233400 | 4.20833100  | C                                                                               | 3.09040200  | 1.45239500  | -1.15351800 |
| C | -2.83456700 | -1.69222200 | 3.80726300  | C                                                                               | 3.31608300  | -1.32363200 | -0.39390200 |
| C | 2.49225700  | -1.53762400 | 2.37772500  | C                                                                               | -3.25792800 | -2.42554600 | -0.47781200 |
| C | 4.29399000  | -2.04558800 | 0.84811500  | C                                                                               | -4.04309900 | -1.44623400 | 1.58649100  |
| C | 4.83110300  | -2.93381100 | 1.78223100  | C                                                                               | -4.69706400 | -2.64067700 | 1.90015500  |
| C | 4.20838100  | -3.11637700 | 3.01771400  | C                                                                               | -4.63775300 | -3.72525900 | 1.02613300  |
| C | 3.03852700  | -2.41356600 | 3.31528700  | C                                                                               | -3.91656400 | -3.61298000 | -0.16538900 |
| C | -0.00011200 | 1.93231200  | 0.00002700  | C                                                                               | -2.34864400 | 1.60220700  | -2.47436000 |
| C | -0.14499000 | 2.65496600  | -1.19493500 | C                                                                               | -4.30673600 | 0.21677000  | -2.14602600 |
| C | 0.14466600  | 2.65487000  | 1.19505900  | C                                                                               | -4.79919900 | 0.62085300  | -3.38856800 |
| C | -0.14109300 | 4.05432400  | -1.19661900 | C                                                                               | -4.07026700 | 1.51290500  | -4.17660500 |
| C | 0.14059600  | 4.05422800  | 1.19687600  | C                                                                               | -2.84800200 | 2.00420200  | -3.71409100 |
| C | -0.00028900 | 4.75993000  | 0.00016200  | C                                                                               | 4.29110900  | 2.12893700  | -0.89862300 |
| H | 2.71751000  | 2.47249000  | -1.40096900 | C                                                                               | 4.81597900  | 3.01295200  | -1.84312800 |
| H | 4.04714200  | 0.74791200  | 2.31738400  | C                                                                               | 4.15225600  | 3.22347500  | -3.05288800 |
| H | 5.16777900  | 2.86345300  | 2.89247100  | C                                                                               | 2.95546000  | 2.55276600  | -3.31367600 |
| H | 5.08649900  | 4.79391000  | 1.32404200  | C                                                                               | 2.42256900  | 1.67908000  | -2.36590800 |
| H | 3.85474200  | 4.57642300  | -0.82998800 | C                                                                               | 3.25823200  | -2.42541700 | 0.47688600  |
| H | 1.35693800  | -1.70156800 | -2.23968300 | C                                                                               | 3.91677800  | -3.61276100 | 0.16393800  |
| H | 4.95501900  | 0.52851700  | -1.44353800 | C                                                                               | 4.63756000  | -3.72473400 | -1.02786500 |
| H | 5.84222300  | -0.11040800 | -3.65258000 | C                                                                               | 4.69653700  | -2.63992600 | -1.90163500 |
| H | 4.48807900  | -1.52863700 | -5.18405900 | C                                                                               | 4.04264300  | -1.44558100 | -1.58744600 |
| H | 2.23876800  | -2.31737700 | -4.46673300 | C                                                                               | 2.34855300  | 1.60056400  | 2.47545500  |
| H | -4.78665500 | -1.91478900 | 0.11013700  | C                                                                               | 4.30728300  | 0.21642400  | 2.14548700  |
| H | -5.73675200 | -3.48415400 | -1.54029000 | C                                                                               | 4.79988800  | 0.61979600  | 3.38819600  |
| H | -4.62775900 | -3.80934000 | -3.74233600 | C                                                                               | 4.07070100  | 1.51085400  | 4.17714100  |
| H | -2.54015200 | -2.56119400 | -4.26932800 | C                                                                               | 2.84805500  | 2.00186700  | 3.71536100  |
| H | -1.56358000 | -1.01979200 | -2.59838000 | C                                                                               | -2.42295200 | 1.67801900  | 2.36649600  |
| H | -2.71828900 | 2.47220400  | 1.40126800  | C                                                                               | -4.29142400 | 2.12812300  | 0.89919300  |
| H | -3.85530800 | 4.57618700  | 0.83006500  | C                                                                               | -4.81653300 | 3.01169700  | 1.84397700  |
| H | -5.08609800 | 4.79395000  | -1.32448800 | C                                                                               | -4.15295800 | 3.22188000  | 3.05388000  |
| H | -5.16661800 | 2.86371300  | -2.89322900 | C                                                                               | -2.95608500 | 2.55126700  | 3.31453600  |
| H | -4.04622100 | 0.74811100  | -2.31792400 | C                                                                               | 0.00011700  | -1.83415900 | -0.00017900 |
| H | -1.35671800 | -1.70135300 | 2.23971100  | C                                                                               | 0.15989100  | -2.55821600 | -1.19295300 |
| H | -4.95502500 | 0.52837600  | 1.44358600  | C                                                                               | -0.15951100 | -2.55841400 | 1.19249000  |
| H | -5.84207400 | -0.11048300 | 3.65270800  |                                                                                 |             |             |             |

|                                                                                                       |             |             |             |   |             |             |             |
|-------------------------------------------------------------------------------------------------------|-------------|-------------|-------------|---|-------------|-------------|-------------|
| C                                                                                                     | 0.15580500  | -3.95752200 | -1.19512900 | H | 0.00280200  | 4.54358200  | -2.15181100 |
| C                                                                                                     | -0.15515100 | -3.95771600 | 1.19447100  | C | -3.38109900 | -2.91796800 | -0.64601600 |
| C                                                                                                     | 0.00039900  | -4.66356700 | -0.00037400 | H | -3.61857200 | -3.61462700 | -1.46151000 |
| H                                                                                                     | -2.68897500 | -2.36051500 | -1.39892200 | H | -2.39531100 | -3.18026800 | -0.27162900 |
| H                                                                                                     | -4.10721400 | -0.60982600 | 2.27399900  | H | -4.12506600 | -3.08327400 | 0.13669500  |
| H                                                                                                     | -5.25715800 | -2.71611400 | 2.82853400  | C | -2.51478300 | -1.44793900 | -2.46783700 |
| H                                                                                                     | -5.14766000 | -4.65339600 | 1.27056100  | H | -2.86322300 | -2.19545600 | -3.19331800 |
| H                                                                                                     | -3.85680200 | -4.45428300 | -0.85025500 | H | -2.51562100 | -0.47720800 | -2.97018700 |
| H                                                                                                     | -1.40953700 | 2.00590900  | -2.10870600 | H | -1.48821800 | -1.70031500 | -2.19370100 |
| H                                                                                                     | -4.88286800 | -0.48039900 | -1.54694500 | C | -3.47449700 | 1.80582600  | -1.99234200 |
| H                                                                                                     | -5.75366100 | 0.23599100  | -3.73817600 | H | -3.87399500 | 2.79950200  | -2.23523400 |
| H                                                                                                     | -4.45411100 | 1.82452600  | -5.14454900 | H | -2.40900600 | 1.81679300  | -2.23721300 |
| H                                                                                                     | -2.27745500 | 2.70499400  | -4.31779000 | H | -3.97301100 | 1.09087600  | -2.64652800 |
| H                                                                                                     | 4.81481200  | 1.97450000  | 0.03957400  | C | -3.16395700 | 2.80735600  | 0.22830600  |
| H                                                                                                     | 5.74330400  | 3.53821300  | -1.63035300 | H | -3.84204700 | 3.63616700  | -0.01821500 |
| H                                                                                                     | 4.56148600  | 3.91329900  | -3.78623300 | H | -3.13694100 | 2.72623800  | 1.31253900  |
| H                                                                                                     | 2.42640700  | 2.72194800  | -4.24763300 | H | -2.17681800 | 3.08398000  | -0.12090500 |
| H                                                                                                     | 1.47503100  | 1.18409400  | -2.55681900 | C | -5.22516400 | 1.53556900  | -0.18402900 |
| H                                                                                                     | 2.68960500  | -2.36062600 | 1.39821900  | H | -5.41866500 | 1.68069800  | 0.88282300  |
| H                                                                                                     | 3.85727400  | -4.45422800 | 0.84861600  | H | -5.75470000 | 0.64347400  | -0.50771800 |
| H                                                                                                     | 5.14738800  | -4.65279800 | -1.27270800 | H | -5.67708000 | 2.39124500  | -0.70403600 |
| H                                                                                                     | 5.25631000  | -2.71511000 | -2.83023200 | C | -4.90650800 | -1.31507900 | -1.69797600 |
| H                                                                                                     | 4.10649100  | -0.60900000 | -2.27477900 | H | -5.61819000 | -1.39151000 | -0.87090700 |
| H                                                                                                     | 1.40917300  | 2.00412000  | 2.11035300  | H | -5.12761000 | -2.14344700 | -2.38397900 |
| H                                                                                                     | 4.88358700  | -0.48001300 | 1.54572900  | H | -5.10414700 | -0.39349800 | -2.24497600 |
| H                                                                                                     | 5.75464300  | 0.23516200  | 3.73724500  | C | -3.11662000 | 0.65679300  | 2.75935500  |
| H                                                                                                     | 4.45466300  | 1.82193200  | 5.14521300  | H | -3.19232200 | 0.31520200  | 3.79993000  |
| H                                                                                                     | 2.27731900  | 2.70189800  | 4.31975600  | H | -2.13014200 | 1.11329500  | 2.63320200  |
| H                                                                                                     | -1.47536200 | 1.18310200  | 2.55732300  | H | -3.87968100 | 1.42585500  | 2.61960300  |
| H                                                                                                     | -4.81502700 | 1.97393000  | -0.03909900 | C | -2.40800500 | -1.67991300 | 2.37828300  |
| H                                                                                                     | -5.74393800 | 3.53686600  | 1.63131700  | H | -2.69949000 | -1.88489300 | 3.41771600  |
| H                                                                                                     | -4.56237100 | 3.91136300  | 3.78744500  | H | -2.48161300 | -2.61159100 | 1.81933100  |
| H                                                                                                     | -2.42715100 | 2.72019600  | 4.24860800  | H | -1.35701300 | -1.38114100 | 2.36876900  |
| H                                                                                                     | 0.29572900  | -2.03081500 | -2.13503800 | C | -4.78997500 | -1.02116700 | 1.97104300  |
| H                                                                                                     | -0.29546600 | -2.03117600 | 2.13465500  | H | -4.99993000 | -1.93812600 | 1.41867800  |
| H                                                                                                     | 0.28248100  | -4.49402500 | -2.13330800 | H | -4.98447000 | -1.23346300 | 3.03123500  |
| H                                                                                                     | -0.28172400 | -4.49436900 | 2.13257400  | H | -5.50586800 | -0.26135300 | 1.65652200  |
| H                                                                                                     | 0.00050900  | -5.75079400 | -0.00044600 | C | 3.70542900  | 1.54811300  | 0.48124900  |
| <i>t</i> - <b>9</b> <sub>tBu</sub> [Pd(P <sup><i>i</i></sup> Bu <sub>3</sub> ) <sub>2</sub> (Ph)(Br)] |             |             |             | C | 3.32157600  | -0.56624700 | -1.83240000 |
| Pd                                                                                                    | 0.00095600  | -0.11252600 | -0.00006600 | C | 3.44186300  | -1.48499800 | 1.23306600  |
| Br                                                                                                    | -0.00004200 | -2.71176300 | 0.00005700  | C | 5.22475700  | 1.53568300  | 0.17994400  |
| P                                                                                                     | 2.74892300  | -0.11261200 | -0.02073500 | H | 5.67713600  | 2.39185800  | 0.69871800  |
| P                                                                                                     | -2.74937700 | -0.11258100 | 0.02062100  | H | 5.75415600  | 0.64383900  | 0.50451500  |
| C                                                                                                     | -3.44243000 | -1.48751600 | -1.23028500 | H | 5.41784200  | 1.67945800  | -0.88716300 |
| C                                                                                                     | -3.32199400 | -0.56253800 | 1.83316900  | C | 3.47493800  | 1.80954000  | 1.98852600  |
| C                                                                                                     | -3.70571800 | 1.54715500  | -0.48470000 | H | 2.40957200  | 1.82115200  | 2.23386200  |
| C                                                                                                     | -0.00056800 | 4.71289200  | -0.00006500 | H | 3.97363300  | 1.09572000  | 2.64380200  |
| C                                                                                                     | -0.00221100 | 4.00624000  | 1.20560800  | H | 3.87471100  | 2.80359900  | 2.22939100  |
| C                                                                                                     | -0.00073900 | 2.60624900  | 1.20348600  | C | 3.16369000  | 2.80722600  | -0.23375200 |
| C                                                                                                     | 0.00060400  | 1.88121400  | -0.00006600 | H | 2.17720700  | 3.08535900  | 0.11612900  |
| C                                                                                                     | 0.00125100  | 2.60625500  | -1.20361600 | H | 3.84271900  | 3.63602200  | 0.01021800  |
| C                                                                                                     | 0.00158000  | 4.00624500  | -1.20573900 | H | 3.13523500  | 2.72387900  | -1.31777400 |
| H                                                                                                     | -0.00099100 | 5.79965600  | -0.00006300 | C | 4.90631000  | -1.31228600 | 1.69952700  |
| H                                                                                                     | -0.00392900 | 4.54357400  | 2.15168000  | H | 5.61749100  | -1.39138900 | 0.87227900  |
| H                                                                                                     | -0.00296300 | 2.07929100  | 2.15512200  | H | 5.10491800  | -0.38943600 | 2.24402100  |
| H                                                                                                     | 0.00381500  | 2.07929700  | -2.15525000 | H | 5.12720100  | -2.13902600 | 2.38755600  |
|                                                                                                       |             |             |             | C | 2.51489000  | -1.44201600 | 2.47100200  |

|                                                                                                       |             |             |             |   |             |             |             |
|-------------------------------------------------------------------------------------------------------|-------------|-------------|-------------|---|-------------|-------------|-------------|
| H                                                                                                     | 2.51638000  | -0.47007200 | 2.97099700  | H | -5.70943000 | 0.40344700  | -0.51184500 |
| H                                                                                                     | 1.48808200  | -1.69463200 | 2.19799200  | H | -5.68142300 | 2.15650200  | -0.67218400 |
| H                                                                                                     | 2.86339800  | -2.18792300 | 3.19810300  | C | -4.79233800 | -1.52972800 | -1.70962900 |
| C                                                                                                     | 3.37953800  | -2.91678900 | 0.65218600  | H | -5.49857900 | -1.63776600 | -0.88138800 |
| H                                                                                                     | 2.39347600  | -3.17947300 | 0.27880200  | H | -4.98845900 | -2.35746900 | -2.40388700 |
| H                                                                                                     | 4.12313600  | -3.08431900 | -0.13040200 | H | -5.02156700 | -0.60902400 | -2.24576800 |
| H                                                                                                     | 3.61695800  | -3.61163600 | 1.46924000  | C | -3.08187400 | 0.45140500  | 2.76521100  |
| C                                                                                                     | 4.78925900  | -1.02617900 | -1.96916500 | H | -3.14457600 | 0.09556200  | 3.80193800  |
| H                                                                                                     | 4.99844400  | -1.94227300 | -1.41508100 | H | -2.11156500 | 0.94266200  | 2.64290000  |
| H                                                                                                     | 4.98371600  | -1.24059900 | -3.02893400 | H | -3.87086300 | 1.19557800  | 2.63491900  |
| H                                                                                                     | 5.50569600  | -0.26632500 | -1.65599700 | C | -2.29825800 | -1.85678500 | 2.36425700  |
| C                                                                                                     | 2.40700600  | -1.68397500 | -2.37579200 | H | -2.61140700 | -2.10359400 | 3.38827200  |
| H                                                                                                     | 2.69853200  | -1.89080400 | -3.41484600 | H | -2.31149900 | -2.77271500 | 1.77617400  |
| H                                                                                                     | 2.48003400  | -2.61478100 | -1.81530800 | H | -1.26280200 | -1.50962600 | 2.39668700  |
| H                                                                                                     | 1.35618400  | -1.38459900 | -2.36691600 | C | -4.69792100 | -1.27190200 | 1.95049400  |
| C                                                                                                     | 3.11721300  | 0.65160700  | -2.76074300 | H | -4.86940000 | -2.19720600 | 1.39864700  |
| H                                                                                                     | 2.13105400  | 1.10903200  | -2.63547800 | H | -4.89488100 | -1.48853000 | 3.00936600  |
| H                                                                                                     | 3.88081900  | 1.42035700  | -2.62227400 | H | -5.43807300 | -0.53940700 | 1.62724400  |
| H                                                                                                     | 3.19275300  | 0.30812700  | -3.80070600 | C | 3.68723100  | 1.36274200  | 0.46634500  |
| <i>t</i> - <b>9</b> <sub>tBu</sub> [Pd(P <sup><i>i</i></sup> Bu <sub>3</sub> ) <sub>2</sub> (Ph)(Cl)] |             |             |             | C | 3.24437800  | -0.76412100 | -1.82494300 |
| Pd                                                                                                    | 0.00111000  | -0.20055600 | 0.00000400  | C | 3.32221800  | -1.65720100 | 1.24636400  |
| P                                                                                                     | 2.68270300  | -0.27205500 | -0.02054500 | C | 5.20554800  | 1.30384800  | 0.16729400  |
| P                                                                                                     | -2.68331400 | -0.27202900 | 0.02051700  | H | 5.68093500  | 2.15646700  | 0.67113100  |
| Cl                                                                                                    | 0.00025300  | -2.64277200 | 0.00039700  | H | 5.70867200  | 0.40344600  | 0.51048800  |
| C                                                                                                     | -3.32248100 | -1.65771400 | -1.24589700 | H | 5.40460400  | 1.42199400  | -0.90173000 |
| C                                                                                                     | -3.24513700 | -0.76349800 | 1.82498800  | C | 3.46604900  | 1.64455400  | 1.97159500  |
| C                                                                                                     | -3.68789900 | 1.36236700  | -0.46716700 | H | 2.40195700  | 1.69378500  | 2.21746500  |
| C                                                                                                     | -0.00054800 | 4.62899800  | 0.00032800  | H | 3.94186300  | 0.92002300  | 2.63237000  |
| C                                                                                                     | 0.00479700  | 3.92171000  | 1.20557700  | H | 3.89838100  | 2.62700000  | 2.20360400  |
| C                                                                                                     | 0.00554800  | 2.52198400  | 1.20267500  | C | 3.17856000  | 2.62948100  | -0.26053800 |
| C                                                                                                     | 0.00068000  | 1.79408400  | 0.00000100  | H | 2.19736000  | 2.93441500  | 0.08341400  |
| C                                                                                                     | -0.00488100 | 2.52229400  | -1.20248400 | H | 3.87763300  | 3.44306200  | -0.02213300 |
| C                                                                                                     | -0.00536100 | 3.92201900  | -1.20508800 | H | 3.15019800  | 2.53718300  | -1.34400500 |
| H                                                                                                     | -0.00101400 | 5.71582000  | 0.00046100  | C | 4.79210900  | -1.52873200 | 1.70989500  |
| H                                                                                                     | 0.00806300  | 4.45878100  | 2.15188900  | H | 5.49828600  | -1.63729300 | 0.88167100  |
| H                                                                                                     | 0.00639200  | 1.99583600  | 2.15495900  | H | 5.02134900  | -0.60767600 | 2.24541500  |
| H                                                                                                     | -0.00529500 | 1.99634500  | -2.15488400 | H | 4.98831900  | -2.35601300 | 2.40466700  |
| H                                                                                                     | -0.00909400 | 4.45930300  | -2.15127500 | C | 2.39605700  | -1.57109800 | 2.48292600  |
| C                                                                                                     | -3.20832900 | -3.09395900 | -0.68151300 | H | 2.41357400  | -0.58947900 | 2.96312000  |
| H                                                                                                     | -3.42777300 | -3.78592700 | -1.50617000 | H | 1.36585700  | -1.81121300 | 2.21157700  |
| H                                                                                                     | -2.21138500 | -3.32391500 | -0.31566100 | H | 2.73137500  | -2.30791600 | 3.22552000  |
| H                                                                                                     | -3.94276700 | -3.29583400 | 0.10187500  | C | 3.20836900  | -3.09367100 | 0.68249000  |
| C                                                                                                     | -2.39622300 | -1.57180500 | -2.48239900 | H | 2.21137700  | -3.32405300 | 0.31704000  |
| H                                                                                                     | -2.73123700 | -2.30898600 | -3.22477400 | H | 3.94258100  | -3.29560400 | -0.10108200 |
| H                                                                                                     | -2.41396700 | -0.59036800 | -2.96295300 | H | 3.42832600  | -3.78527400 | 1.50731500  |
| H                                                                                                     | -1.36597400 | -1.81150800 | -2.21086300 | C | 4.69723700  | -1.27237400 | -1.95033600 |
| C                                                                                                     | -3.46642700 | 1.64368700  | -1.97249000 | H | 4.86895400  | -2.19744700 | -1.39818000 |
| H                                                                                                     | -3.89895500 | 2.62593000  | -2.20498100 | H | 4.89411800  | -1.48936600 | -3.00914400 |
| H                                                                                                     | -2.40227000 | 1.69308600  | -2.21812500 | H | 5.43730300  | -0.53964000 | -1.62745500 |
| H                                                                                                     | -3.94189400 | 0.91876900  | -2.63310800 | C | 2.29765100  | -1.85770500 | -2.36387400 |
| C                                                                                                     | -3.17909300 | 2.62928200  | 0.25930700  | H | 2.61107900  | -2.10497700 | -3.38769000 |
| H                                                                                                     | -3.87765300 | 3.44306100  | 0.02013400  | H | 2.31068900  | -2.77333200 | -1.77532700 |
| H                                                                                                     | -3.15128000 | 2.53756900  | 1.34284300  | H | 1.26221500  | -1.51052300 | -2.39676400 |
| H                                                                                                     | -2.19760300 | 2.93354700  | -0.08440600 | C | 3.08097400  | 0.45045900  | -2.76555800 |
| C                                                                                                     | -5.20624300 | 1.30372900  | -0.16839700 | H | 2.11062500  | 0.94164900  | -2.64338700 |
| H                                                                                                     | -5.40553900 | 1.42171200  | 0.90060500  | H | 3.86990900  | 1.19474100  | -2.63552900 |
|                                                                                                       |             |             |             | H | 3.14369000  | 0.09426500  | -3.80216100 |

|                                                                                                                                                          |             |             |             |   |             |             |             |
|----------------------------------------------------------------------------------------------------------------------------------------------------------|-------------|-------------|-------------|---|-------------|-------------|-------------|
| $\alpha$ - <b>10</b> <sub>Cy</sub> [( $\mu$ -Br) <sub>2</sub> Pd <sub>2</sub> (PCy <sub>3</sub> ) <sub>2</sub> (Ph) <sub>2</sub> ] (conformer <b>F</b> ) |             |             |             | H | -5.93138800 | -0.90912300 | -1.30069100 |
| Pd                                                                                                                                                       | -1.86021000 | 0.54458000  | -0.18606400 | H | -6.35313200 | 1.44110600  | -0.66489700 |
| Pd                                                                                                                                                       | 1.86017700  | -0.54456200 | -0.18603900 | H | -5.00092400 | 1.97634300  | -1.65123600 |
| Br                                                                                                                                                       | 0.45096000  | 1.68116700  | -0.36328800 | H | -7.54047400 | 0.56870100  | -2.64815300 |
| Br                                                                                                                                                       | -0.45098600 | -1.68114400 | -0.36329300 | H | -7.13356000 | 2.26782900  | -2.87251600 |
| P                                                                                                                                                        | 3.97950100  | 0.41540200  | 0.04721700  | H | -5.18740000 | 1.65504400  | -4.28789100 |
| P                                                                                                                                                        | -3.97951000 | -0.41542200 | 0.04726200  | H | -6.64719600 | 0.91281700  | -4.93809700 |
| C                                                                                                                                                        | 3.06918100  | -4.38434300 | -1.60849500 | C | -4.90940600 | 1.16701800  | 3.87306300  |
| C                                                                                                                                                        | 2.69647100  | -3.04013200 | -1.50282300 | C | -4.15518600 | 0.33372500  | 2.82264300  |
| C                                                                                                                                                        | 2.63576800  | -2.40154500 | -0.25198500 | C | -4.94877200 | 0.28855000  | 1.49643700  |
| C                                                                                                                                                        | 2.94602500  | -3.15486500 | 0.88893400  | C | -6.35174400 | -0.30879000 | 1.73954400  |
| C                                                                                                                                                        | 3.32005700  | -4.50088000 | 0.78365200  | C | -7.11364700 | 0.50943400  | 2.79908500  |
| C                                                                                                                                                        | 3.38936000  | -5.11994600 | -0.46473600 | C | -6.32473200 | 0.61878000  | 4.11226200  |
| H                                                                                                                                                        | 3.10194000  | -4.85600300 | -2.58838400 | H | -4.97418300 | 2.21017500  | 3.53056600  |
| H                                                                                                                                                        | 2.43339300  | -2.49505400 | -2.40595600 | H | -4.34286100 | 1.17915200  | 4.81292800  |
| H                                                                                                                                                        | 2.87443100  | -2.71037400 | 1.87687400  | H | -4.01624800 | -0.68020200 | 3.21293800  |
| H                                                                                                                                                        | 3.54796800  | -5.06489400 | 1.68586200  | H | -3.15199500 | 0.73968700  | 2.65453100  |
| H                                                                                                                                                        | 3.67752200  | -6.16491700 | -0.54561800 | H | -5.07911000 | 1.33321000  | 1.17998600  |
| C                                                                                                                                                        | -3.38942000 | 5.11993000  | -0.46512600 | H | -6.93571400 | -0.34277300 | 0.81243300  |
| C                                                                                                                                                        | -3.32010100 | 4.50096800  | 0.78331200  | H | -6.25400000 | -1.34520200 | 2.08887300  |
| C                                                                                                                                                        | -2.94607000 | 3.15496100  | 0.88870400  | H | -6.25400000 | 1.51785000  | 2.40311400  |
| C                                                                                                                                                        | -2.63583500 | 2.40154200  | -0.25215700 | H | -8.09602800 | 0.05489300  | 2.98109200  |
| C                                                                                                                                                        | -2.69654700 | 3.04002800  | -1.50304700 | H | -6.25147200 | -0.37779700 | 4.57262400  |
| C                                                                                                                                                        | -3.06925400 | 4.38423200  | -1.60882800 | H | -6.86483200 | 1.25329500  | 4.82630500  |
| H                                                                                                                                                        | -3.67758000 | 6.16489400  | -0.54609200 | C | 4.77270500  | 4.64567400  | -0.15689700 |
| H                                                                                                                                                        | -3.54799900 | 5.06505900  | 1.68547900  | C | 5.10283000  | 3.13959400  | -0.17115700 |
| H                                                                                                                                                        | -2.87445800 | 2.71055600  | 1.87668200  | C | 3.85617500  | 2.30422000  | 0.20142800  |
| H                                                                                                                                                        | -2.43347300 | 2.49487700  | -2.40613600 | C | 3.31537300  | 2.75363600  | 1.57715200  |
| H                                                                                                                                                        | -3.10201900 | 4.85581100  | -2.58875500 | C | 2.97052800  | 4.25184200  | 1.57373200  |
| C                                                                                                                                                        | -4.77250900 | -4.64576300 | -0.15610800 | C | 4.18664300  | 5.10294500  | 1.18568400  |
| C                                                                                                                                                        | -5.10272700 | -3.13970500 | -0.17058100 | H | 4.04896500  | 4.85730400  | -0.95745900 |
| C                                                                                                                                                        | -3.85610000 | -2.30420400 | 0.20180600  | H | 5.67858400  | 5.21796700  | -0.39605700 |
| C                                                                                                                                                        | -3.31519900 | -2.75336800 | 1.57757400  | H | 5.91992500  | 2.94008400  | 0.53458600  |
| C                                                                                                                                                        | -2.97025500 | -4.25155100 | 1.57436100  | H | 5.47251300  | 2.87631800  | -1.16730000 |
| C                                                                                                                                                        | -4.18633700 | -5.10279100 | 1.18650900  | H | 3.07823700  | 2.53950300  | -0.53667600 |
| H                                                                                                                                                        | -4.04880300 | -4.85747100 | -0.95668000 | H | 2.43049700  | 2.17072600  | 1.85042100  |
| H                                                                                                                                                        | -5.67836800 | -5.21814600 | -0.39512700 | H | 4.08130600  | 2.57395000  | 2.34313900  |
| H                                                                                                                                                        | -5.91979200 | -2.94013500 | 0.53517700  | H | 2.14805300  | 4.42824800  | 0.86701400  |
| H                                                                                                                                                        | -5.47247800 | -2.87660100 | -1.16674500 | H | 2.59990200  | 4.54431700  | 2.56453500  |
| H                                                                                                                                                        | -3.07818900 | -2.53958000 | -0.53629900 | H | 4.95664600  | 5.01394100  | 1.96708800  |
| H                                                                                                                                                        | -2.43035200 | -2.17035300 | 1.85071200  | H | 3.91336100  | 6.16462800  | 1.13634400  |
| H                                                                                                                                                        | -4.08111000 | -2.57362300 | 2.34356800  | C | 4.90902100  | -1.16632500 | 3.87340500  |
| H                                                                                                                                                        | -2.14780900 | -4.42801000 | 0.86762100  | C | 4.15488400  | -0.33330300 | 2.82271100  |
| H                                                                                                                                                        | -2.59955300 | -4.54385100 | 2.56518600  | C | 4.94863000  | -0.28833200 | 1.49659300  |
| H                                                                                                                                                        | -4.95630000 | -5.01371800 | 1.96794500  | C | 6.35156400  | 0.30908700  | 1.73974100  |
| H                                                                                                                                                        | -3.91299200 | -6.16446400 | 1.13731600  | C | 7.11335900  | -0.50886700 | 2.79956700  |
| C                                                                                                                                                        | -5.29057500 | -0.48110100 | -3.96522800 | C | 6.32427900  | -0.61794600 | 4.11266500  |
| C                                                                                                                                                        | -4.36639100 | -0.55785200 | -2.73822400 | H | 4.97390800  | -2.20955300 | 3.53114400  |
| C                                                                                                                                                        | -5.11624900 | -0.18654000 | -1.43821000 | H | 4.34235600  | -1.17828900 | 4.81320000  |
| C                                                                                                                                                        | -5.77195700 | 1.20514200  | -1.56365900 | H | 4.01580400  | 0.68069500  | 3.21277600  |
| C                                                                                                                                                        | -6.69895300 | 1.26343600  | -2.79196500 | H | 3.15175000  | -0.73938500 | 2.65454600  |
| C                                                                                                                                                        | -5.95716000 | 0.89628700  | -4.08482100 | H | 5.07902300  | -1.33303700 | 1.18031100  |
| H                                                                                                                                                        | -6.06844500 | -1.25524500 | -3.88361200 | H | 6.93564800  | 0.34284900  | 0.81269300  |
| H                                                                                                                                                        | -4.71660700 | -0.71018100 | -4.87208200 | H | 6.25376300  | 1.34558600  | 2.08879900  |
| H                                                                                                                                                        | -3.52087500 | 0.13007200  | -2.86913800 | H | 7.30365600  | -1.51736500 | 2.40384900  |
| H                                                                                                                                                        | -3.93311200 | -1.56284200 | -2.66369100 | H | 8.09569900  | -0.05424700 | 2.98159900  |
|                                                                                                                                                          |             |             |             | H | 6.25089600  | 0.37873600  | 4.57277700  |

|                                                                                                                                          |             |             |             |   |             |             |             |
|------------------------------------------------------------------------------------------------------------------------------------------|-------------|-------------|-------------|---|-------------|-------------|-------------|
| H                                                                                                                                        | 6.86432300  | -1.25225800 | 4.82693200  | H | 5.33164200  | -3.09169200 | 0.66160500  |
| C                                                                                                                                        | 5.29087200  | 0.48023500  | -3.96518700 | H | 2.90780000  | -2.58568200 | 0.19419400  |
| C                                                                                                                                        | 4.36658400  | 0.55722400  | -2.73827500 | H | 2.20055800  | -1.81265800 | -2.06716800 |
| C                                                                                                                                        | 5.11634500  | 0.18619200  | -1.43812600 | H | 3.80713400  | -2.20685600 | -2.69322500 |
| C                                                                                                                                        | 5.77206100  | -1.20551400 | -1.56323900 | H | 1.84065900  | -4.17532400 | -1.42645400 |
| C                                                                                                                                        | 6.69917700  | -1.26404100 | -2.79144300 | H | 2.23165900  | -4.05926000 | -3.13960900 |
| C                                                                                                                                        | 5.95749500  | -0.89716400 | -4.08444200 | H | 4.57830700  | -4.72225400 | -2.71036800 |
| H                                                                                                                                        | 6.06872000  | 1.25441100  | -3.88366900 | H | 3.50292000  | -5.93216300 | -2.01616000 |
| H                                                                                                                                        | 4.71697400  | 0.70911600  | -4.87213500 | C | 4.71806800  | -1.33776000 | 4.00780100  |
| H                                                                                                                                        | 3.52109300  | -0.13074300 | -2.86911600 | C | 3.94295600  | -1.17822500 | 2.68889400  |
| H                                                                                                                                        | 3.93328400  | 1.56222200  | -2.66398400 | C | 4.82329500  | -0.54424800 | 1.58784900  |
| H                                                                                                                                        | 5.93147600  | 0.90880200  | -1.30070300 | C | 5.40047100  | 0.80390200  | 2.06863600  |
| H                                                                                                                                        | 6.35314500  | -1.44130500 | -0.66437200 | C | 6.17707800  | 0.63388900  | 3.38685900  |
| H                                                                                                                                        | 5.00103600  | -1.97672800 | -1.65075500 | C | 5.31047000  | -0.00366200 | 4.48163500  |
| H                                                                                                                                        | 7.54067100  | -0.56926100 | -2.64769200 | H | 5.53110600  | -2.06564300 | 3.86548700  |
| H                                                                                                                                        | 7.13380800  | -2.26844200 | -2.87175100 | H | 4.05451800  | -1.75741700 | 4.77441300  |
| H                                                                                                                                        | 5.18776900  | -1.65597700 | -4.28742900 | H | 3.06351500  | -0.54096100 | 2.85191500  |
| H                                                                                                                                        | 6.64761000  | -0.91385100 | -4.93765100 | H | 3.55867500  | -2.15332600 | 2.36778200  |
| <b><math>\alpha</math>-10<sub>Cy</sub> [(μ-Cl)<sub>2</sub>Pd<sub>2</sub>(PCy<sub>3</sub>)<sub>2</sub>(Ph)<sub>2</sub>] (conformer F)</b> |             |             |             | H | 5.67360600  | -1.21597800 | 1.40638000  |
| Pd                                                                                                                                       | 1.78481900  | 0.55090200  | 0.16957100  | H | 6.06457100  | 1.23734300  | 1.31213500  |
| Pd                                                                                                                                       | -1.76755600 | -0.53784300 | 0.15420900  | H | 4.58686900  | 1.52162800  | 2.21160200  |
| P                                                                                                                                        | -3.86843200 | 0.44200200  | -0.02375400 | H | 7.06090000  | 0.00191500  | 3.21063800  |
| P                                                                                                                                        | 3.87942000  | -0.44577600 | -0.03968300 | H | 6.55343900  | 1.61050700  | 3.71678800  |
| Cl                                                                                                                                       | -0.43453700 | 1.58512600  | 0.34552800  | H | 4.49209400  | 0.68372200  | 4.74213600  |
| Cl                                                                                                                                       | 0.45349900  | -1.58463900 | 0.24829400  | H | 5.89890600  | -0.15090500 | 5.39628500  |
| C                                                                                                                                        | -2.96527300 | -4.39581200 | 1.50626700  | C | 5.37086900  | 1.59762900  | -3.43953700 |
| C                                                                                                                                        | -2.58461100 | -3.05247300 | 1.42355400  | C | 4.50010300  | 0.61104800  | -2.64310400 |
| C                                                                                                                                        | -2.54871200 | -2.38479900 | 0.18722000  | C | 5.05704300  | 0.43475000  | -1.21253000 |
| C                                                                                                                                        | -2.88956400 | -3.10886900 | -0.96388400 | C | 6.50488900  | -0.09798000 | -1.28582000 |
| C                                                                                                                                        | -3.27089100 | -4.45428600 | -0.88161300 | C | 7.39480100  | 0.87023800  | -2.08867200 |
| C                                                                                                                                        | -3.31736700 | -5.10170000 | 0.35335900  | C | 6.83380800  | 1.13127300  | -3.49466200 |
| H                                                                                                                                        | -2.98175200 | -4.89001800 | 2.47542600  | H | 5.31780800  | 2.58843700  | -2.96623400 |
| H                                                                                                                                        | -2.29922700 | -2.52904200 | 2.33277400  | H | 4.97046500  | 1.71086100  | -4.45516900 |
| H                                                                                                                                        | -2.83907900 | -2.64068300 | -1.94216300 | H | 4.50085000  | -0.35455700 | -3.16159000 |
| H                                                                                                                                        | -3.52429200 | -4.99525100 | -1.79112500 | H | 3.45918000  | 0.94872600  | -2.61567000 |
| H                                                                                                                                        | -3.61372000 | -6.14563700 | 0.41651100  | H | 5.09087600  | 1.43826500  | -0.76560200 |
| C                                                                                                                                        | 3.32707400  | 5.09994400  | 0.61665300  | H | 6.93069200  | -0.24265800 | -0.28690400 |
| C                                                                                                                                        | 3.24328000  | 4.52999600  | -0.65422400 | H | 6.51156200  | -1.07985900 | -1.77654900 |
| C                                                                                                                                        | 2.86360900  | 3.19032700  | -0.80730300 | H | 7.47002200  | 1.82216500  | -1.54289900 |
| C                                                                                                                                        | 2.56261800  | 2.39442400  | 0.30716700  | H | 8.41356100  | 0.46682500  | -2.15419700 |
| C                                                                                                                                        | 2.62937600  | 2.98638400  | 1.57980100  | H | 6.89331200  | 0.20389100  | -4.08365500 |
| C                                                                                                                                        | 3.01053400  | 4.32345800  | 1.73359900  | H | 7.45193100  | 1.87242500  | -4.01701300 |
| H                                                                                                                                        | 3.62304100  | 6.13915500  | 0.73537100  | C | -4.55898000 | 4.67567000  | 0.34139200  |
| H                                                                                                                                        | 3.46561900  | 5.12732500  | -1.53615100 | C | -4.92864800 | 3.17946000  | 0.29447200  |
| H                                                                                                                                        | 2.78284700  | 2.78217100  | -1.80991700 | C | -3.70273400 | 2.32952400  | -0.11220000 |
| H                                                                                                                                        | 2.36405100  | 2.40970100  | 2.46261600  | C | -3.15371400 | 2.81740000  | -1.47172700 |
| H                                                                                                                                        | 3.05280700  | 4.75777200  | 2.73027500  | C | -2.76773500 | 4.30405300  | -1.40714500 |
| C                                                                                                                                        | 4.48635500  | -4.66528600 | -0.55084400 | C | -3.95991600 | 5.17148200  | -0.98177500 |
| C                                                                                                                                        | 4.89518800  | -3.19465200 | -0.33741300 | H | -3.83047100 | 4.83515600  | 1.14953300  |
| C                                                                                                                                        | 3.67506900  | -2.26377100 | -0.52176100 | H | -5.44949600 | 5.26181200  | 0.60373900  |
| C                                                                                                                                        | 3.06553500  | -2.46769700 | -1.92721600 | H | -5.75012500 | 3.03053700  | -0.41911800 |
| C                                                                                                                                        | 2.64732200  | -3.93364300 | -2.13160000 | H | -5.30690000 | 2.88532600  | 1.27883100  |
| C                                                                                                                                        | 3.83040300  | -4.88908100 | -1.92020900 | H | -2.91558300 | 2.51892200  | 0.62884100  |
| H                                                                                                                                        | 3.78085600  | -4.95634900 | 0.24091300  | H | -2.28558800 | 2.22221700  | -1.76950000 |
| H                                                                                                                                        | 5.36765800  | -5.31012700 | -0.43767700 | H | -3.92597900 | 2.69052100  | -2.24216500 |
| H                                                                                                                                        | 5.68246200  | -2.93246800 | -1.05608300 | H | -1.94017200 | 4.42679400  | -0.69549800 |
|                                                                                                                                          |             |             |             | H | -2.39042000 | 4.62762600  | -2.38567100 |

|   |             |             |             |
|---|-------------|-------------|-------------|
| H | -4.73235800 | 5.13675200  | -1.76516200 |
| H | -3.65740900 | 6.22229100  | -0.88847400 |
| C | -4.83474800 | -0.98682600 | -3.89849300 |
| C | -4.06348000 | -0.20891100 | -2.81861900 |
| C | -4.85388300 | -0.19771700 | -1.48979200 |
| C | -6.24736100 | 0.43138300  | -1.70665000 |
| C | -7.02494400 | -0.33165400 | -2.79546400 |
| C | -6.23967400 | -0.40328800 | -4.11344500 |
| H | -4.91929200 | -2.04095800 | -3.59612800 |
| H | -4.26978700 | -0.97382300 | -4.83925500 |
| H | -3.90412400 | 0.81619400  | -3.16983900 |
| H | -3.06855000 | -0.64064800 | -2.66647800 |
| H | -4.99999000 | -1.25047600 | -1.20889300 |
| H | -6.82916400 | 0.43876800  | -0.77748500 |
| H | -6.13277200 | 1.47885700  | -2.01549000 |
| H | -7.23178900 | -1.35139400 | -2.43879700 |
| H | -7.99962300 | 0.14640500  | -2.95753300 |
| H | -6.14850800 | 0.60924100  | -4.53414600 |
| H | -6.79225700 | -0.99889100 | -4.85109400 |
| C | -5.16307000 | 0.40241100  | 3.99448500  |
| C | -4.24372100 | 0.51044800  | 2.76603700  |
| C | -5.00101500 | 0.18239100  | 1.45878300  |
| C | -5.66693700 | -1.20734700 | 1.54645000  |
| C | -6.58913400 | -1.29588600 | 2.77647200  |
| C | -5.83838900 | -0.97346100 | 4.07592600  |
| H | -5.93604000 | 1.18377500  | 3.93991800  |
| H | -4.58351500 | 0.60044100  | 4.90510100  |
| H | -3.40177300 | -0.18600500 | 2.87265400  |
| H | -3.80556300 | 1.51494600  | 2.71952800  |
| H | -5.81028800 | 0.91577700  | 1.34436700  |
| H | -6.25368700 | -1.41217900 | 0.64369300  |
| H | -4.90117200 | -1.98645300 | 1.60812700  |
| H | -7.42607300 | -0.59103100 | 2.65747900  |
| H | -7.03069100 | -2.29912200 | 2.82868500  |
| H | -5.07284300 | -1.74322900 | 4.25146900  |
| H | -6.52397500 | -1.01131700 | 4.93211800  |

$\alpha$ -**10<sub>H</sub>** [( $\mu$ -Br)<sub>2</sub>Pd<sub>2</sub>(PH<sub>3</sub>)<sub>2</sub>(Ph)<sub>2</sub>]

|    |             |             |             |
|----|-------------|-------------|-------------|
| Pd | 1.69591000  | -0.71538900 | -0.05713400 |
| Pd | -1.69592200 | 0.71539700  | -0.05697800 |
| Br | 0.75084700  | 1.64103700  | -0.30584600 |
| Br | -0.75087700 | -1.64101900 | -0.30585300 |
| P  | 2.68431000  | -2.73102400 | 0.18641900  |
| P  | -2.68431200 | 2.73102500  | 0.18668300  |
| C  | -5.31367600 | -1.00534900 | 1.48612100  |
| C  | -4.05711000 | -0.39803600 | 1.37936700  |
| C  | -3.55415800 | -0.03816500 | 0.12199900  |
| C  | -4.32803400 | -0.27342900 | -1.02225100 |
| C  | -5.58382800 | -0.88105000 | -0.90900900 |
| C  | -6.07939700 | -1.24716000 | 0.34389700  |
| H  | -5.68955900 | -1.29002600 | 2.46617300  |
| H  | -3.46724100 | -0.22811400 | 2.27682900  |
| H  | -3.95031200 | -0.00527700 | -2.00593500 |
| H  | -6.17092200 | -1.06865400 | -1.80504600 |
| H  | -7.05484400 | -1.71863600 | 0.42950700  |
| C  | 6.07945700  | 1.24712100  | 0.34318200  |
| C  | 5.58373400  | 0.88098500  | -0.90965600 |

|   |             |             |             |
|---|-------------|-------------|-------------|
| C | 4.32791800  | 0.27337800  | -1.02273300 |
| C | 3.55417400  | 0.03815600  | 0.12161600  |
| C | 4.05728100  | 0.39805300  | 1.37891400  |
| C | 5.31386800  | 1.00535200  | 1.48550300  |
| H | 7.05492100  | 1.71858500  | 0.42866300  |
| H | 6.17072400  | 1.06855700  | -1.80576700 |
| H | 3.95007600  | 0.00520500  | -2.00636500 |
| H | 3.46751500  | 0.22816400  | 2.27645100  |
| H | 5.68987100  | 1.29005000  | 2.46550300  |
| H | -1.87962700 | 3.89137500  | 0.15092300  |
| H | -3.67515800 | 3.10711600  | -0.74514900 |
| H | -3.40263100 | 2.98432700  | 1.37484300  |
| H | 1.87960400  | -3.89136400 | 0.15081300  |
| H | 3.67500400  | -3.10715200 | -0.74556100 |
| H | 3.40281400  | -2.98430800 | 1.37447200  |

*s*-**10<sub>H</sub>** [( $\mu$ -Br)<sub>2</sub>Pd<sub>2</sub>(PH<sub>3</sub>)<sub>2</sub>(Ph)<sub>2</sub>]

|    |             |             |             |
|----|-------------|-------------|-------------|
| Pd | -1.83796400 | -0.55004500 | -0.02505000 |
| Pd | 1.83640200  | -0.54976900 | -0.01305300 |
| Br | -0.00028400 | -2.44136900 | -0.12261000 |
| Br | 0.00024700  | 1.17765300  | -0.32671500 |
| P  | 3.58503800  | -1.95325700 | 0.28021700  |
| P  | -3.58862900 | -1.95331900 | 0.25639900  |
| C  | 4.44153300  | 2.60027700  | 1.29420700  |
| C  | 3.54610800  | 1.52491400  | 1.26733300  |
| C  | 3.20957800  | 0.91979400  | 0.04904000  |
| C  | 3.79024400  | 1.38923000  | -1.13680100 |
| C  | 4.68503100  | 2.46503200  | -1.10312800 |
| C  | 5.01313900  | 3.07171000  | 0.11079100  |
| H  | 4.68735600  | 3.06888700  | 2.24432400  |
| H  | 3.09951100  | 1.17754200  | 2.19579200  |
| H  | 3.53587500  | 0.93486600  | -2.09124400 |
| H  | 5.12146100  | 2.82766300  | -2.03089400 |
| H  | 5.70778200  | 3.90715800  | 0.13415600  |
| C  | -5.00738300 | 3.07630500  | 0.13782700  |
| C  | -4.68617100 | 2.47827400  | -1.08219300 |
| C  | -3.79388200 | 1.40084100  | -1.12814700 |
| C  | -3.20872000 | 0.92116500  | 0.05134000  |
| C  | -3.53836600 | 1.51759500  | 1.27579400  |
| C  | -4.43138800 | 2.59456700  | 1.31496700  |
| H  | -5.70009500 | 3.91303100  | 0.17081300  |
| H  | -5.12606800 | 2.84892700  | -2.00514000 |
| H  | -3.54491400 | 0.95314800  | -2.08716000 |
| H  | -3.08817000 | 1.16233100  | 2.19951400  |
| H  | -4.67185000 | 3.05640300  | 2.26976000  |
| H  | 4.62156500  | -1.94006800 | -0.67771000 |
| H  | 4.37121900  | -1.81137000 | 1.44396500  |
| H  | 3.33684500  | -3.34261100 | 0.33546200  |
| H  | -4.37098700 | -1.82231300 | 1.42397700  |
| H  | -4.62793000 | -1.92798500 | -0.69827000 |
| H  | -3.34298900 | -3.34365300 | 0.29634900  |

$\alpha$ -**10<sub>H</sub>** [( $\mu$ -Cl)<sub>2</sub>Pd<sub>2</sub>(PH<sub>3</sub>)<sub>2</sub>(Ph)<sub>2</sub>]

|    |             |             |             |
|----|-------------|-------------|-------------|
| Pd | 1.65390000  | -0.66405300 | -0.07427200 |
| Pd | -1.65391200 | 0.66407900  | -0.07442000 |
| P  | 2.65144200  | -2.67150600 | 0.09451700  |
| P  | -2.65155200 | 2.67149900  | 0.09417000  |



|    |             |             |             |
|----|-------------|-------------|-------------|
| Cl | 0.68101500  | 1.55600900  | -0.23183800 |
| Cl | -0.68098600 | -1.55589800 | -0.23273300 |
| C  | -5.27943400 | -1.09930200 | 1.37085100  |
| C  | -4.02959100 | -0.47422600 | 1.29562900  |
| C  | -3.50254400 | -0.10283100 | 0.05157300  |
| C  | -4.24629100 | -0.34384800 | -1.11119700 |
| C  | -5.49575500 | -0.96910900 | -1.02943800 |
| C  | -6.01503200 | -1.34688900 | 0.21021100  |
| H  | -5.67448500 | -1.39244600 | 2.34081100  |
| H  | -3.46350700 | -0.29770900 | 2.20697000  |
| H  | -3.85014200 | -0.06458900 | -2.08448200 |
| H  | -6.06002700 | -1.16007000 | -1.93932900 |
| H  | -6.98596600 | -1.83135900 | 0.27146200  |
| C  | 6.01511800  | 1.34677800  | 0.20977800  |
| C  | 5.49569300  | 0.96879100  | -1.02974700 |
| C  | 4.24619600  | 0.34356300  | -1.11125400 |
| C  | 3.50255900  | 0.10280400  | 0.05164800  |
| C  | 4.02975000  | 0.47441200  | 1.29557100  |
| C  | 5.27963400  | 1.09943900  | 1.37054100  |
| H  | 6.98608100  | 1.83121500  | 0.27083700  |
| H  | 6.05987900  | 1.15955600  | -1.93973200 |
| H  | 3.84994300  | 0.06412400  | -2.08444500 |
| H  | 3.46374400  | 0.29810500  | 2.20700000  |
| H  | 5.67480000  | 1.39274700  | 2.34040500  |
| H  | -1.83150800 | 3.82071700  | 0.07058000  |
| H  | -3.60065600 | 3.03898000  | -0.88328800 |
| H  | -3.41416800 | 2.95024200  | 1.24827000  |
| H  | 1.83140800  | -3.82071800 | 0.07028500  |
| H  | 3.60126500  | -3.03894400 | -0.88225500 |
| H  | 3.41320400  | -2.95031600 | 1.24916900  |

***s*-10<sub>H</sub> [(μ-Cl)<sub>2</sub>Pd<sub>2</sub>(PH<sub>3</sub>)<sub>2</sub>(Ph)<sub>2</sub>]**

|    |             |             |             |
|----|-------------|-------------|-------------|
| Pd | -1.78131000 | -0.62956700 | -0.01620300 |
| Pd | 1.78131000  | -0.62956800 | -0.01619500 |
| P  | 3.51143400  | -2.06420100 | 0.07046900  |
| P  | -3.51143700 | -2.06420300 | 0.07038100  |
| Cl | 0.00000000  | 1.01279400  | -0.09874600 |
| Cl | -0.00000100 | -2.39409800 | -0.04653000 |
| C  | 4.50366000  | 2.43542500  | 1.22600400  |
| C  | 3.59911900  | 1.36757700  | 1.21958800  |
| C  | 3.17031900  | 0.81637100  | 0.00481000  |
| C  | 3.66886000  | 1.33080900  | -1.19945000 |
| C  | 4.57311000  | 2.39878400  | -1.18626500 |
| C  | 4.99328500  | 2.95188800  | 0.02486500  |
| H  | 4.82222500  | 2.86201600  | 2.17430600  |
| H  | 3.21845000  | 0.98284800  | 2.16256200  |
| H  | 3.34309900  | 0.91665900  | -2.15048100 |
| H  | 4.94614600  | 2.79661700  | -2.12717300 |
| H  | 5.69632700  | 3.78061400  | 0.03251400  |
| C  | -4.99328300 | 2.95189000  | 0.02492000  |
| C  | -4.57309500 | 2.39882300  | -1.18622200 |
| C  | -3.66884600 | 1.33084800  | -1.19943100 |
| C  | -3.17031800 | 0.81637200  | 0.00481900  |
| C  | -3.59913100 | 1.36754100  | 1.21960900  |
| C  | -4.50367100 | 2.43538900  | 1.22604800  |
| H  | -5.69632400 | 3.78061600  | 0.03258700  |
| H  | -4.94612000 | 2.79668600  | -2.12712200 |

|   |             |             |             |
|---|-------------|-------------|-------------|
| H | -3.34307300 | 0.91672700  | -2.15047100 |
| H | -3.21847400 | 0.98278100  | 2.16257500  |
| H | -4.82224600 | 2.86195100  | 2.17436000  |
| H | 4.47919400  | -2.02470000 | -0.95595700 |
| H | 4.37865600  | -2.00903300 | 1.18248800  |
| H | 3.22051500  | -3.44596400 | 0.06757000  |
| H | -4.37871400 | -2.00905500 | 1.18235800  |
| H | -4.47914600 | -2.02468600 | -0.95609200 |
| H | -3.22051500 | -3.44596500 | 0.06747200  |

***a*-10<sub>Ph</sub> [(μ-Br)<sub>2</sub>Pd<sub>2</sub>(PPh<sub>3</sub>)<sub>2</sub>(Ph)<sub>2</sub>]**

|    |             |             |             |
|----|-------------|-------------|-------------|
| Pd | 1.81705600  | 0.52613200  | -0.22836800 |
| Pd | -1.80540000 | -0.54534200 | -0.11013900 |
| Br | -0.44623300 | 1.68756500  | -0.52535600 |
| Br | 0.44932900  | -1.73498000 | -0.36259000 |
| P  | -3.87113200 | 0.49777000  | 0.01453500  |
| P  | 3.88029600  | -0.49189600 | 0.04263400  |
| C  | -3.35171900 | -4.18494000 | 1.55899900  |
| C  | -2.87063700 | -2.87980200 | 1.40715400  |
| C  | -2.64556300 | -2.35025300 | 0.13003700  |
| C  | -2.91348400 | -3.14617600 | -0.99279300 |
| C  | -3.40052300 | -4.44964500 | -0.83785500 |
| C  | -3.62223900 | -4.97257700 | 0.43804600  |
| H  | -3.51614500 | -4.58292800 | 2.55806400  |
| H  | -2.66885000 | -2.28150900 | 2.29233400  |
| H  | -2.72952800 | -2.76156500 | -1.99308300 |
| H  | -3.59801200 | -5.05659700 | -1.71899400 |
| H  | -3.99711400 | -5.98597500 | 0.55760800  |
| C  | 3.58353700  | 4.98655800  | 0.19116200  |
| C  | 3.56449000  | 4.35756600  | -1.05543800 |
| C  | 3.09944100  | 3.04350100  | -1.17835100 |
| C  | 2.63963600  | 2.34577200  | -0.05425600 |
| C  | 2.65494000  | 2.98288400  | 1.19479600  |
| C  | 3.12586100  | 4.29578800  | 1.31539900  |
| H  | 3.94610700  | 6.00714600  | 0.28477500  |
| H  | 3.91160000  | 4.88792800  | -1.93956200 |
| H  | 3.09156800  | 2.57189400  | -2.15789700 |
| H  | 2.28678500  | 2.46625500  | 2.07809000  |
| H  | 3.12721900  | 4.77797500  | 2.29083400  |
| C  | -3.57045700 | 4.50288500  | 2.35793700  |
| C  | -4.37457400 | 4.43670500  | 1.21897800  |
| C  | -4.47164200 | 3.24661700  | 0.49497200  |
| C  | -3.75640000 | 2.11129100  | 0.90141000  |
| C  | -2.93923200 | 2.18992300  | 2.04035800  |
| C  | -2.85459300 | 3.37618500  | 2.76914300  |
| H  | -3.49383800 | 5.43107900  | 2.91777400  |
| H  | -4.92636300 | 5.31256400  | 0.88840100  |
| H  | -5.09819600 | 3.20903700  | -0.39028500 |
| H  | -2.35251300 | 1.32679600  | 2.34217100  |
| H  | -2.21558000 | 3.42414100  | 3.64652300  |
| C  | -7.43558900 | -1.68466900 | 2.07020800  |
| C  | -6.87852400 | -0.55525900 | 2.66891700  |
| C  | -5.81530500 | 0.11388400  | 2.05709000  |
| C  | -5.29372200 | -0.34411400 | 0.83862100  |
| C  | -5.85700200 | -1.48766500 | 0.24629500  |
| C  | -6.92172400 | -2.14805400 | 0.85617400  |
| H  | -8.26355800 | -2.20342800 | 2.54604000  |

|                                                                                                                      |             |             |             |   |             |             |             |
|----------------------------------------------------------------------------------------------------------------------|-------------|-------------|-------------|---|-------------|-------------|-------------|
| H                                                                                                                    | -7.27180300 | -0.18536200 | 3.61212600  | C | 2.88015200  | -2.90554000 | -1.33895900 |
| H                                                                                                                    | -5.40012600 | 0.99671900  | 2.53080900  | C | 2.60235700  | -2.33559700 | -0.09010400 |
| H                                                                                                                    | -5.45649400 | -1.87105100 | -0.68603200 | C | 2.82337000  | -3.09363500 | 1.06848300  |
| H                                                                                                                    | -7.34310300 | -3.03180000 | 0.38528700  | C | 3.31851400  | -4.39972800 | 0.97656200  |
| C                                                                                                                    | -5.44308300 | 1.58534600  | -4.22719600 | C | 3.59392800  | -4.96306200 | -0.27134700 |
| C                                                                                                                    | -6.34888200 | 1.44263000  | -3.17393100 | H | 3.57457600  | -4.64389300 | -2.40559200 |
| C                                                                                                                    | -5.89412800 | 1.10430200  | -1.89841300 | H | 2.71667300  | -2.33517200 | -2.25000100 |
| C                                                                                                                    | -4.52348300 | 0.90541800  | -1.66230800 | H | 2.59992200  | -2.67514200 | 2.04696400  |
| C                                                                                                                    | -3.62022800 | 1.04700500  | -2.72809900 | H | 3.48283000  | -4.97658600 | 1.88434100  |
| C                                                                                                                    | -4.07963700 | 1.38777100  | -4.00159100 | H | 3.97633500  | -5.97827400 | -0.34191200 |
| H                                                                                                                    | -5.79959300 | 1.84582400  | -5.22022200 | C | -3.53983500 | 4.96970700  | -0.06537000 |
| H                                                                                                                    | -7.41204000 | 1.59078700  | -3.34371700 | C | -3.49349100 | 4.30184200  | 1.16009700  |
| H                                                                                                                    | -6.60819700 | 0.98651700  | -1.08934100 | C | -3.02465700 | 2.98551800  | 1.23166700  |
| H                                                                                                                    | -2.55867300 | 0.89423800  | -2.55820900 | C | -2.58845100 | 2.32511800  | 0.07635200  |
| H                                                                                                                    | -3.36879800 | 1.49441700  | -4.81635000 | C | -2.63079700 | 3.00089100  | -1.15134600 |
| C                                                                                                                    | 7.73909700  | 1.91018000  | -0.97794400 | C | -3.10555300 | 4.31588000  | -1.22044700 |
| C                                                                                                                    | 7.35451500  | 0.84149300  | -1.78693200 | H | -3.90690900 | 5.99159200  | -0.11898100 |
| C                                                                                                                    | 6.20637100  | 0.10563700  | -1.48270400 | H | -3.82441400 | 4.80300100  | 2.06717400  |
| C                                                                                                                    | 5.42524200  | 0.43550900  | -0.36567700 | H | -2.99931100 | 2.48117900  | 2.19443400  |
| C                                                                                                                    | 5.81735500  | 1.51848000  | 0.44009600  | H | -2.28274800 | 2.51102900  | -2.05784100 |
| C                                                                                                                    | 6.96745100  | 2.24506100  | 0.13769700  | H | -3.12939200 | 4.82840500  | -2.17996800 |
| H                                                                                                                    | 8.63312000  | 2.48089400  | -1.21470900 | C | 3.59748000  | 4.49456000  | -2.36518200 |
| H                                                                                                                    | 7.94852700  | 0.57127200  | -2.65597300 | C | 4.41760600  | 4.41083900  | -1.23847400 |
| H                                                                                                                    | 5.92630400  | -0.72825700 | -2.11690700 | C | 4.47907800  | 3.22722300  | -0.50139500 |
| H                                                                                                                    | 5.21773000  | 1.80428300  | 1.29748200  | C | 3.71379300  | 2.11559400  | -0.88319000 |
| H                                                                                                                    | 7.25360000  | 3.08070600  | 0.77024200  | C | 2.88322500  | 2.21123700  | -2.01023100 |
| C                                                                                                                    | 4.48422600  | -1.97269100 | 4.41227600  | C | 2.83196200  | 3.39239000  | -2.75092000 |
| C                                                                                                                    | 5.60074300  | -1.67968300 | 3.62676100  | H | 3.54781900  | 5.41848100  | -2.93514300 |
| C                                                                                                                    | 5.43786200  | -1.22475500 | 2.31700500  | H | 5.00915400  | 5.26810900  | -0.92845700 |
| C                                                                                                                    | 4.15160900  | -1.05629300 | 1.77813300  | H | 5.11802800  | 3.17468500  | 0.37447700  |
| C                                                                                                                    | 3.03412000  | -1.35265200 | 2.57567100  | H | 2.26180400  | 1.36689700  | -2.29364700 |
| C                                                                                                                    | 3.20227700  | -1.81058200 | 3.88347800  | H | 2.18033700  | 3.45536900  | -3.61796600 |
| H                                                                                                                    | 4.61324400  | -2.32392500 | 5.43260100  | C | 7.45017600  | -1.66270200 | -1.89213800 |
| H                                                                                                                    | 6.60158400  | -1.80179100 | 4.03236600  | C | 6.91168300  | -0.53548800 | -2.51166100 |
| H                                                                                                                    | 6.31330400  | -0.99282400 | 1.71888700  | C | 5.82491800  | 0.13064600  | -1.93958100 |
| H                                                                                                                    | 2.03484100  | -1.23191400 | 2.16843100  | C | 5.26000800  | -0.32869000 | -0.74076200 |
| H                                                                                                                    | 2.32827300  | -2.03681000 | 4.48808000  | C | 5.80437000  | -1.47081100 | -0.12799400 |
| C                                                                                                                    | 4.22263900  | -4.26546200 | -2.65304100 | C | 6.89353400  | -2.12742600 | -0.69777400 |
| C                                                                                                                    | 4.75064700  | -4.29716600 | -1.36114500 | H | 8.29654000  | -2.17913500 | -2.33715000 |
| C                                                                                                                    | 4.64917500  | -3.17813500 | -0.53234500 | H | 7.33758600  | -0.16536900 | -3.44047600 |
| C                                                                                                                    | 4.00995400  | -2.01627400 | -0.98803200 | H | 5.42387200  | 1.01110600  | -2.42960300 |
| C                                                                                                                    | 3.46999900  | -1.99653600 | -2.28422400 | H | 5.36981900  | -1.85648200 | 0.78801500  |
| C                                                                                                                    | 3.58418200  | -3.11201900 | -3.11430600 | H | 7.29958000  | -3.01010600 | -0.21168400 |
| H                                                                                                                    | 4.30034200  | -5.13882000 | -3.29495200 | C | 5.13931400  | 1.68634000  | 4.31736300  |
| H                                                                                                                    | 5.24054000  | -5.19476200 | -0.99344100 | C | 6.10867100  | 1.42999000  | 3.34596300  |
| H                                                                                                                    | 5.06134800  | -3.21625900 | 0.47086100  | C | 5.72794900  | 1.06384000  | 2.05348800  |
| H                                                                                                                    | 2.94370200  | -1.11352300 | -2.63598600 | C | 4.36864600  | 0.94830100  | 1.71998300  |
| H                                                                                                                    | 3.15877200  | -3.08421500 | -4.11363000 | C | 3.39953800  | 1.20644100  | 2.70376000  |
| $\alpha$ -10 <sub>Ph</sub> [(μ-Cl) <sub>2</sub> Pd <sub>2</sub> (PPh <sub>3</sub> ) <sub>2</sub> (Ph) <sub>2</sub> ] |             |             |             | C | 3.78572300  | 1.57605600  | 3.99272900  |
| Pd                                                                                                                   | -1.75310700 | 0.51373200  | 0.16606000  | H | 5.43783900  | 1.96847200  | 5.32353400  |
| Pd                                                                                                                   | 1.74808000  | -0.53671200 | 0.06556900  | H | 7.16407900  | 1.51196900  | 3.59195000  |
| P                                                                                                                    | 3.80223400  | 0.51024300  | 0.01965500  | H | 6.49106000  | 0.85992400  | 1.30920300  |
| P                                                                                                                    | -3.80920900 | -0.51168400 | -0.01920700 | H | 2.34527600  | 1.12476500  | 2.45644600  |
| Cl                                                                                                                   | 0.42879000  | 1.58626000  | 0.37156300  | H | 3.02535800  | 1.77336200  | 4.74338700  |
| Cl                                                                                                                   | -0.43137100 | -1.63405300 | 0.18004400  | C | -7.63590400 | 1.89219800  | 1.10178900  |
| C                                                                                                                    | 3.36825500  | -4.21370200 | -1.42790600 | C | -7.22029700 | 0.83415400  | 1.90944700  |
|                                                                                                                      |             |             |             | C | -6.08165700 | 0.09725800  | 1.57361800  |

|                                                                                                                                      |             |             |             |   |             |             |             |
|--------------------------------------------------------------------------------------------------------------------------------------|-------------|-------------|-------------|---|-------------|-------------|-------------|
| C                                                                                                                                    | -5.34181600 | 0.41585900  | 0.42572700  | H | 5.85619400  | -3.19415500 | 1.17846300  |
| C                                                                                                                                    | -5.76353300 | 1.48942000  | -0.37739300 | H | 4.89663800  | -3.63495000 | 2.58801300  |
| C                                                                                                                                    | -6.90424400 | 2.21682100  | -0.04349000 | H | 6.19328000  | 0.07100700  | -2.23193200 |
| H                                                                                                                                    | -8.52251100 | 2.46369500  | 1.36328900  | H | 4.53407700  | 0.63887500  | -2.52292600 |
| H                                                                                                                                    | -7.78229900 | 0.57367400  | 2.80240200  | H | 5.25113200  | -0.59925900 | -3.56074100 |
| H                                                                                                                                    | -5.77507100 | -0.72768800 | 2.20749700  | H | 6.62469700  | -2.23012000 | -1.17667800 |
| H                                                                                                                                    | -5.19326100 | 1.76768000  | -1.25708700 | H | 5.89332400  | -2.80472200 | -2.67358200 |
| H                                                                                                                                    | -7.21414800 | 3.04527600  | -0.67429400 | H | 5.31826000  | -3.42081500 | -1.12944300 |
| C                                                                                                                                    | -4.52296500 | -2.09375300 | -4.33647200 | H | 2.87211800  | -2.71888800 | -1.84036400 |
| C                                                                                                                                    | -5.61812100 | -1.72208600 | -3.55469400 | H | 3.64721700  | -2.25615800 | -3.35789200 |
| C                                                                                                                                    | -5.42442000 | -1.23590000 | -2.26017800 | H | 2.62106900  | -1.10060100 | -2.48807000 |
| C                                                                                                                                    | -4.12788900 | -1.11379900 | -1.73438100 | H | 5.07466800  | 2.42112900  | 0.37226000  |
| C                                                                                                                                    | -3.03110100 | -1.49021900 | -2.52765600 | H | 5.87742900  | 1.65928300  | -0.99773700 |
| C                                                                                                                                    | -3.23108100 | -1.97970200 | -3.81902100 | H | 6.81043300  | 2.12161800  | 0.42236700  |
| H                                                                                                                                    | -4.67597700 | -2.46921100 | -5.34480800 | H | 7.03370300  | -1.41108200 | 1.01488100  |
| H                                                                                                                                    | -6.62658600 | -1.80745700 | -3.95078200 | H | 7.77612500  | 0.17431600  | 1.20800800  |
| H                                                                                                                                    | -6.28381600 | -0.94362800 | -1.66549400 | H | 7.36107300  | -0.40217300 | -0.40041000 |
| H                                                                                                                                    | -2.02422400 | -1.40875300 | -2.12923900 | H | 4.46175200  | 1.17459900  | 2.42127900  |
| H                                                                                                                                    | -2.37341500 | -2.26796600 | -4.42062900 | H | 6.20534300  | 1.37139800  | 2.60513100  |
| C                                                                                                                                    | -4.05673300 | -4.24013900 | 2.74516200  | H | 5.47041600  | -0.19402800 | 2.93618800  |
| C                                                                                                                                    | -4.73963000 | -4.24142300 | 1.52707200  | C | -5.66822300 | -0.34153500 | 0.78825700  |
| C                                                                                                                                    | -4.66221800 | -3.13659800 | 0.67817500  | C | -5.84694400 | -1.71252900 | 0.08897200  |
| C                                                                                                                                    | -3.89518600 | -2.01896300 | 1.03969700  | H | -5.07530400 | -2.42128900 | 0.37342300  |
| C                                                                                                                                    | -3.20392100 | -2.02914700 | 2.26073100  | H | -5.87631300 | -1.65920500 | -0.99745300 |
| C                                                                                                                                    | -3.29038000 | -3.13217600 | 3.11117700  | H | -6.81095500 | -2.12081200 | 0.42181400  |
| H                                                                                                                                    | -4.11478700 | -5.10353400 | 3.40256200  | C | -5.42274400 | -0.67389800 | 2.27789000  |
| H                                                                                                                                    | -5.33126400 | -5.10441400 | 1.23348800  | H | -4.46135900 | -1.17424000 | 2.42149700  |
| H                                                                                                                                    | -5.19396200 | -3.14957500 | -0.26814200 | H | -6.20490800 | -1.37130700 | 2.60544700  |
| H                                                                                                                                    | -2.58242900 | -1.18164400 | 2.53442200  | H | -5.47019500 | 0.19422600  | 2.93651200  |
| H                                                                                                                                    | -2.74447700 | -3.13050500 | 4.05049500  | C | -7.02418200 | 0.38991000  | 0.64028600  |
| $\alpha$ -10 <sub>t</sub> Bu [(μ-Br) <sub>2</sub> Pd <sub>2</sub> (P <sup>t</sup> Bu <sub>3</sub> ) <sub>2</sub> (Ph) <sub>2</sub> ] |             |             |             | H | -7.36109700 | 0.40231300  | -0.39988600 |
| Pd                                                                                                                                   | 1.96272900  | 0.42133600  | -0.13999200 | H | -7.03328900 | 1.41150100  | 1.01510400  |
| Pd                                                                                                                                   | -1.96271600 | -0.42144800 | -0.13990000 | H | -7.77584600 | -0.17377900 | 1.20875200  |
| Br                                                                                                                                   | -0.27403600 | 1.65584100  | -0.44121000 | C | -3.89378200 | 2.19397500  | 1.34742500  |
| Br                                                                                                                                   | 0.27411900  | -1.65626800 | -0.43945300 | C | -3.14987000 | 3.37636000  | 0.68698200  |
| P                                                                                                                                    | -4.13286500 | 0.68498300  | 0.10207600  | H | -3.76006600 | 3.90406400  | -0.04883000 |
| P                                                                                                                                    | 4.13300200  | -0.68490300 | 0.10198700  | H | -2.20789700 | 3.08634800  | 0.22652200  |
| C                                                                                                                                    | 3.89430000  | -2.19393400 | 1.34737800  | H | -2.90786300 | 4.09850400  | 1.47795900  |
| C                                                                                                                                    | 4.63411400  | -1.38440000 | -1.64910700 | C | -5.18647800 | 2.79363000  | 1.94539600  |
| C                                                                                                                                    | 5.66838600  | 0.34175600  | 0.78794100  | H | -5.85528300 | 3.19499500  | 1.17881900  |
| C                                                                                                                                    | 2.99401500  | -1.68494800 | 2.49927500  | H | -4.89571600 | 3.63470100  | 2.58872000  |
| C                                                                                                                                    | 3.15047400  | -3.37643500 | 0.68704500  | H | -5.74979500 | 2.10011800  | 2.57055600  |
| C                                                                                                                                    | 5.18715700  | -2.79342900 | 1.94517000  | C | -2.99340100 | 1.68489600  | 2.49921100  |
| C                                                                                                                                    | 5.18783800  | -0.23873400 | -2.52579700 | H | -3.42815300 | 0.84738600  | 3.04825800  |
| C                                                                                                                                    | 5.67830200  | -2.52236000 | -1.63402100 | H | -2.84060200 | 2.50561200  | 3.21305100  |
| C                                                                                                                                    | 3.36118500  | -1.89540000 | -2.36051600 | H | -2.01211400 | 1.37828500  | 2.12762800  |
| C                                                                                                                                    | 5.84696800  | 1.71275600  | 0.08865300  | C | -4.63425600 | 1.38461300  | -1.64887200 |
| C                                                                                                                                    | 7.02439300  | -0.38957900 | 0.63983600  | C | -3.36141900 | 1.89561200  | -2.36044100 |
| C                                                                                                                                    | 5.42305200  | 0.67411900  | 2.27759800  | H | -2.62140000 | 1.10076400  | -2.48824800 |
| H                                                                                                                                    | 2.01259800  | -1.37860300 | 2.12782500  | H | -2.87217200 | 2.71896600  | -1.84024800 |
| H                                                                                                                                    | 3.42867000  | -0.84728300 | 3.04815800  | H | -3.64760000 | 2.25655400  | -3.35770600 |
| H                                                                                                                                    | 2.84153900  | -2.50562900 | 3.21322500  | C | -5.67834600 | 2.52265500  | -1.63343700 |
| H                                                                                                                                    | 2.20838700  | -3.08657300 | 0.22673500  | H | -6.62490700 | 2.23023300  | -1.17655100 |
| H                                                                                                                                    | 2.90869800  | -4.09861800 | 1.47805800  | H | -5.89302600 | 2.80565900  | -2.67289400 |
| H                                                                                                                                    | 3.76064600  | -3.90403100 | -0.04885900 | H | -5.31836800 | 3.42077100  | -1.12820800 |
| H                                                                                                                                    | 5.75015500  | -2.10003500 | 2.57075100  | C | -5.18820700 | 0.23906600  | -2.52557700 |
|                                                                                                                                      |             |             |             | H | -4.53460700 | -0.63865900 | -2.52272900 |

|                                                                                                                                                    |             |             |             |   |             |             |             |
|----------------------------------------------------------------------------------------------------------------------------------------------------|-------------|-------------|-------------|---|-------------|-------------|-------------|
| H                                                                                                                                                  | -5.25142800 | 0.59961400  | -3.56051700 | H | -7.86995200 | -0.57747600 | -0.03094600 |
| H                                                                                                                                                  | -6.19371000 | -0.07049600 | -2.23171400 | H | -6.99294200 | -1.24651100 | 1.33735700  |
| C                                                                                                                                                  | -3.03420700 | -4.30253600 | 1.29519600  | H | -5.64235800 | 0.91792900  | 1.84937500  |
| C                                                                                                                                                  | -2.69339100 | -2.94662700 | 1.22450200  | H | -6.96407600 | 1.39637700  | 0.78869500  |
| C                                                                                                                                                  | -2.67896900 | -2.27983800 | -0.00844900 | H | -5.32190500 | 1.94213900  | 0.45318000  |
| C                                                                                                                                                  | -2.97634700 | -3.00223300 | -1.17201100 | H | -2.40983500 | -1.09776500 | -2.54041900 |
| C                                                                                                                                                  | -3.31505500 | -4.35782400 | -1.09948300 | H | -4.07318500 | -0.72688400 | -3.02060200 |
| C                                                                                                                                                  | -3.35403200 | -5.01124200 | 0.13483400  | H | -3.32364200 | -2.23926600 | -3.53941600 |
| H                                                                                                                                                  | -3.04241100 | -4.80383800 | 2.26076100  | H | -5.60965700 | -3.59732500 | -0.95925700 |
| H                                                                                                                                                  | -2.42409500 | -2.41911200 | 2.13606700  | H | -5.02371300 | -3.70812000 | -2.61714200 |
| H                                                                                                                                                  | -2.93561000 | -2.51669300 | -2.14370700 | H | -6.01447300 | -2.33710400 | -2.13962600 |
| H                                                                                                                                                  | -3.54377000 | -4.90285200 | -2.01279900 | H | -1.88031500 | -3.02630100 | -0.94636400 |
| H                                                                                                                                                  | -3.61840800 | -6.06404900 | 0.19018400  | H | -2.78006500 | -4.00556400 | -2.09740000 |
| C                                                                                                                                                  | 3.35315800  | 5.01128800  | 0.13675600  | H | -3.18582200 | -4.09538300 | -0.38819000 |
| C                                                                                                                                                  | 3.31424200  | 4.35849500  | -1.09789400 | C | 5.59115200  | -0.22133900 | 0.90715500  |
| C                                                                                                                                                  | 2.97579800  | 3.00287400  | -1.17110100 | C | 6.03431100  | 1.04224500  | 0.12804600  |
| C                                                                                                                                                  | 2.67864800  | 2.27981400  | -0.00789400 | H | 5.37286400  | 1.88566600  | 0.30158500  |
| C                                                                                                                                                  | 2.69299600  | 2.94598000  | 1.22539800  | H | 6.12257100  | 0.89501200  | -0.94638500 |
| C                                                                                                                                                  | 3.03353600  | 4.30192400  | 1.29677000  | H | 7.02971500  | 1.31922900  | 0.50157500  |
| H                                                                                                                                                  | 3.61733300  | 6.06411800  | 0.19263300  | C | 5.31369000  | 0.26198300  | 2.34892600  |
| H                                                                                                                                                  | 3.54279600  | 4.90403700  | -2.01094300 | H | 4.42999100  | 0.90406200  | 2.39166800  |
| H                                                                                                                                                  | 2.93509000  | 2.51782900  | -2.14304500 | H | 6.17066800  | 0.86298700  | 2.68020600  |
| H                                                                                                                                                  | 2.42386000  | 2.41794500  | 2.13671100  | H | 5.19430600  | -0.54962900 | 3.06775500  |
| H                                                                                                                                                  | 3.04169500  | 4.80273100  | 2.26259400  | C | 6.81333600  | -1.17086600 | 0.90718100  |
| <i>s</i> - <b>10</b> <sub>tBu</sub> [(μ-Br) <sub>2</sub> Pd <sub>2</sub> (P <sup><i>i</i></sup> Bu <sub>3</sub> ) <sub>2</sub> (Ph) <sub>2</sub> ] |             |             |             | H | 7.21130700  | -1.31123000 | -0.10163000 |
| Pd                                                                                                                                                 | -1.98982300 | 0.42368600  | -0.15256300 | H | 6.62695200  | -2.15152600 | 1.34074200  |
| Pd                                                                                                                                                 | 2.00282700  | 0.40093500  | -0.21473100 | H | 7.60963600  | -0.69790000 | 1.49725400  |
| Br                                                                                                                                                 | -0.01341600 | -1.37929600 | -0.59455500 | C | 3.38400400  | -2.38454900 | 1.51221600  |
| Br                                                                                                                                                 | 0.01136000  | 1.98729100  | -0.45934900 | C | 2.48772700  | -3.46897300 | 0.87331900  |
| P                                                                                                                                                  | -3.98604400 | -0.98626200 | 0.02103800  | H | 3.03145400  | -4.12567000 | 0.19079000  |
| P                                                                                                                                                  | 3.94823100  | -1.03492400 | 0.18910900  | H | 1.62591000  | -3.05022200 | 0.35600800  |
| C                                                                                                                                                  | -3.91930100 | -1.94996700 | 1.71427100  | H | 2.10319500  | -4.10096900 | 1.68530400  |
| C                                                                                                                                                  | -5.76093900 | -0.13946400 | -0.10781700 | C | 4.51933600  | -3.14075100 | 2.23675000  |
| C                                                                                                                                                  | -3.90120100 | -2.28995200 | -1.45467200 | H | 5.14702500  | -3.71390200 | 1.54859700  |
| C                                                                                                                                                  | -2.45315500 | -2.34806500 | 1.99699000  | H | 4.05498100  | -3.86205000 | 2.92219100  |
| C                                                                                                                                                  | -4.33873200 | -1.00766500 | 2.86428200  | H | 5.16231700  | -2.49925600 | 2.84055400  |
| C                                                                                                                                                  | -4.79623300 | -3.21866300 | 1.79118700  | C | 2.51514200  | -1.65328100 | 2.56305300  |
| C                                                                                                                                                  | -5.95671900 | 0.39242600  | -1.54667800 | H | 3.05972900  | -0.88175100 | 3.11073700  |
| C                                                                                                                                                  | -6.93633400 | -1.07807900 | 0.25837600  | H | 2.15963100  | -2.39035600 | 3.29572700  |
| C                                                                                                                                                  | -5.90645900 | 1.09972300  | 0.80964700  | H | 1.63914100  | -1.19037200 | 2.10013400  |
| C                                                                                                                                                  | -3.40148900 | -1.52802300 | -2.70609400 | C | 4.42114300  | -1.94449600 | -1.46966700 |
| C                                                                                                                                                  | -5.22580100 | -3.00724000 | -1.79641000 | C | 3.12066500  | -2.29908500 | -2.22563500 |
| C                                                                                                                                                  | -2.87216200 | -3.41019700 | -1.17912700 | H | 2.53592000  | -1.40632200 | -2.46364700 |
| H                                                                                                                                                  | -1.80145300 | -1.47217800 | 2.05778100  | H | 2.47046800  | -2.98080500 | -1.67828100 |
| H                                                                                                                                                  | -2.03235900 | -3.01727200 | 1.24744700  | H | 3.39524400  | -2.78695100 | -3.17090400 |
| H                                                                                                                                                  | -2.41894100 | -2.86581400 | 2.96551200  | C | 5.26248500  | -3.22900600 | -1.30326200 |
| H                                                                                                                                                  | -3.81454700 | -0.04798400 | 2.82440900  | H | 6.22020700  | -3.05320200 | -0.81103300 |
| H                                                                                                                                                  | -4.07567900 | -1.48867100 | 3.81547200  | H | 5.47945200  | -3.62957100 | -2.30287900 |
| H                                                                                                                                                  | -5.41456700 | -0.82068800 | 2.88687700  | H | 4.73570200  | -4.01205500 | -0.75473700 |
| H                                                                                                                                                  | -4.48512700 | -3.99103900 | 1.08531600  | C | 5.20107800  | -0.97793600 | -2.38815900 |
| H                                                                                                                                                  | -5.85608300 | -3.01637700 | 1.63035400  | H | 4.70029400  | -0.01037200 | -2.49110000 |
| H                                                                                                                                                  | -4.69608700 | -3.64660300 | 2.79792500  | H | 5.25917400  | -1.42714000 | -3.38816000 |
| H                                                                                                                                                  | -6.08702000 | -0.39215800 | -2.29351800 | H | 6.22669100  | -0.80986500 | -2.05217200 |
| H                                                                                                                                                  | -5.12697200 | 1.03503900  | -1.85308200 | C | 3.69776300  | 4.17758900  | 0.89090700  |
| H                                                                                                                                                  | -6.86669800 | 1.00653900  | -1.56265600 | C | 3.11805800  | 2.90479600  | 0.94514400  |
| H                                                                                                                                                  | -6.92135000 | -2.04648500 | -0.23860100 | C | 3.01885800  | 2.11951700  | -0.21189200 |
|                                                                                                                                                    |             |             |             | C | 3.47209600  | 2.64590500  | -1.42947800 |

|                                                                                                                                      |             |             |             |   |             |             |             |
|--------------------------------------------------------------------------------------------------------------------------------------|-------------|-------------|-------------|---|-------------|-------------|-------------|
| C                                                                                                                                    | 4.04871300  | 3.91978200  | -1.48124800 | H | -5.77017400 | 1.59243500  | 1.08967500  |
| C                                                                                                                                    | 4.17251500  | 4.68645000  | -0.32019100 | H | -6.72474800 | 2.06474900  | -0.31300500 |
| H                                                                                                                                    | 3.76782600  | 4.77334100  | 1.79841400  | H | -6.89610800 | -1.46393700 | -0.95678200 |
| H                                                                                                                                    | 2.73009200  | 2.53804400  | 1.89174800  | H | -7.66744400 | 0.11100100  | -1.12048800 |
| H                                                                                                                                    | 3.37212700  | 2.07138300  | -2.34696900 | H | -7.22608900 | -0.48033600 | 0.47552500  |
| H                                                                                                                                    | 4.39687700  | 4.31227100  | -2.43418700 | H | -4.38435700 | 1.18856200  | -2.35038300 |
| H                                                                                                                                    | 4.62002000  | 5.67603600  | -0.36135200 | H | -6.13300700 | 1.35532100  | -2.51510900 |
| C                                                                                                                                    | -3.94379300 | 4.70597900  | 0.81267000  | H | -5.37192400 | -0.19094900 | -2.87679100 |
| C                                                                                                                                    | -3.86786300 | 4.25504000  | -0.50689700 | C | 5.55867200  | -0.30889100 | -0.71938700 |
| C                                                                                                                                    | -3.35588400 | 2.98337500  | -0.79188700 | C | 5.75166500  | -1.66553800 | 0.00338000  |
| C                                                                                                                                    | -2.92314100 | 2.14333600  | 0.24358200  | H | 4.99279100  | -2.39006300 | -0.27588200 |
| C                                                                                                                                    | -2.97498100 | 2.61284000  | 1.56339800  | H | 5.77016600  | -1.59281700 | 1.08901400  |
| C                                                                                                                                    | -3.48695500 | 3.88350400  | 1.84541500  | H | 6.72463300  | -2.06489200 | -0.31381800 |
| H                                                                                                                                    | -4.34059000 | 5.69354300  | 1.03288000  | C | 5.33449600  | -0.66772900 | -2.20612000 |
| H                                                                                                                                    | -4.19975400 | 4.89396200  | -1.32235200 | H | 4.38415900  | -1.18827600 | -2.35082800 |
| H                                                                                                                                    | -3.28445600 | 2.65881600  | -1.82672900 | H | 6.13279200  | -1.35498200 | -2.51575000 |
| H                                                                                                                                    | -2.60925400 | 1.99522000  | 2.37987600  | H | 5.37165800  | 0.19134500  | -2.87707500 |
| H                                                                                                                                    | -3.52322700 | 4.23053300  | 2.87582800  | C | 6.90039700  | 0.44746000  | -0.56816700 |
| $\alpha$ -10 <sub>t</sub> Bu [(μ-Cl) <sub>2</sub> Pd <sub>2</sub> (P <sup>t</sup> Bu <sub>3</sub> ) <sub>2</sub> (Ph) <sub>2</sub> ] |             |             |             | H | 7.22617400  | 0.48007000  | 0.47511300  |
| Pd                                                                                                                                   | -1.86510600 | 0.42703700  | 0.16648800  | H | 6.89610500  | 1.46391100  | -0.95701900 |
| Pd                                                                                                                                   | 1.86508800  | -0.42700600 | 0.16628800  | H | 7.66735600  | -0.11103800 | -1.12103100 |
| P                                                                                                                                    | -4.00000700 | -0.69895100 | -0.06299400 | C | 3.73937500  | 2.18503500  | -1.33124900 |
| P                                                                                                                                    | 4.00003800  | 0.69891300  | -0.06310100 | C | 2.96184100  | 3.36267700  | -0.69986400 |
| Cl                                                                                                                                   | 0.28803600  | 1.56361900  | 0.42306100  | H | 3.54781200  | 3.91149000  | 0.04059900  |
| Cl                                                                                                                                   | -0.28800900 | -1.56354000 | 0.42340100  | H | 2.01534100  | 3.06167500  | -0.25627000 |
| C                                                                                                                                    | -3.73926100 | -2.18477300 | -1.33148600 | H | 2.72712000  | 4.07061300  | -1.50593600 |
| C                                                                                                                                    | -4.46701700 | -1.43316600 | 1.68182600  | C | 5.02747700  | 2.79964300  | -1.92379600 |
| C                                                                                                                                    | -5.55872900 | 0.30888800  | -0.71899500 | H | 5.68051000  | 3.22254000  | -1.15526500 |
| C                                                                                                                                    | -2.86150800 | -1.64034700 | -2.48491500 | H | 4.72893000  | 3.62688000  | -2.58119800 |
| C                                                                                                                                    | -2.96160000 | -3.36250300 | -0.70041900 | H | 5.61009400  | 2.10837800  | -2.53376800 |
| C                                                                                                                                    | -5.02732100 | -2.79934100 | -1.92416900 | C | 2.86155300  | 1.64093900  | -2.48478100 |
| C                                                                                                                                    | -5.03245300 | -0.31294700 | 2.58314800  | H | 3.31665600  | 0.80297900  | -3.01645300 |
| C                                                                                                                                    | -5.48908700 | -2.59079300 | 1.65713700  | H | 2.70245100  | 2.44768500  | -3.21306700 |
| C                                                                                                                                    | -3.17658800 | -1.93194700 | 2.37095000  | H | 1.88189200  | 1.32280600  | -2.11849900 |
| C                                                                                                                                    | -5.75174100 | 1.66538200  | 0.00405200  | C | 4.46708500  | 1.43279500  | 1.68185600  |
| C                                                                                                                                    | -6.90040800 | -0.44754800 | -0.56777900 | C | 3.17668800  | 1.93157000  | 2.37103700  |
| C                                                                                                                                    | -5.33468800 | 0.66800200  | -2.20568200 | H | 2.45163700  | 1.12445600  | 2.50709700  |
| H                                                                                                                                    | -1.88186400 | -1.32220900 | -2.11858200 | H | 2.67536500  | 2.73372500  | 1.83043200  |
| H                                                                                                                                    | -3.31668900 | -0.80230700 | -3.01639300 | H | 3.44703200  | 2.31666600  | 3.36376000  |
| H                                                                                                                                    | -2.70235100 | -2.44691700 | -3.21338200 | C | 5.48922300  | 2.59036500  | 1.65735600  |
| H                                                                                                                                    | -2.01508500 | -3.06152900 | -0.25683600 | H | 6.44792700  | 2.30721800  | 1.22021000  |
| H                                                                                                                                    | -2.72689400 | -4.07024000 | -1.50667200 | H | 5.68329700  | 2.89929800  | 2.69342000  |
| H                                                                                                                                    | -3.54747100 | -3.91152800 | 0.03996500  | H | 5.11881600  | 3.46998300  | 1.12774400  |
| H                                                                                                                                    | -5.60998000 | -2.10798600 | -2.53399800 | C | 5.03242800  | 0.31240600  | 2.58302500  |
| H                                                                                                                                    | -5.68032800 | -3.22244600 | -1.15573200 | H | 4.39504100  | -0.57725300 | 2.58654100  |
| H                                                                                                                                    | -4.72871200 | -3.62641500 | -2.58174900 | H | 5.07672700  | 0.69041000  | 3.61267700  |
| H                                                                                                                                    | -6.04698000 | -0.01764800 | 2.30590500  | H | 6.04697800  | 0.01714700  | 2.30582200  |
| H                                                                                                                                    | -4.39507400 | 0.57671800  | 2.58687400  | C | 2.96292800  | -4.30862000 | -1.22811600 |
| H                                                                                                                                    | -5.07683800 | -0.69112800 | 3.61273000  | C | 2.61941800  | -2.95271500 | -1.17290900 |
| H                                                                                                                                    | -6.44782000 | -2.30761700 | 1.22007100  | C | 2.59059600  | -2.27526300 | 0.05384100  |
| H                                                                                                                                    | -5.68311600 | -2.89992800 | 2.69314900  | C | 2.87417000  | -2.98785400 | 1.22686600  |
| H                                                                                                                                    | -5.11864800 | -3.47029200 | 1.12735500  | C | 3.21600400  | -4.34307200 | 1.16977400  |
| H                                                                                                                                    | -2.67521100 | -2.73400700 | 1.83025600  | C | 3.27115000  | -5.00657200 | -0.05840400 |
| H                                                                                                                                    | -3.44690700 | -2.31717800 | 3.36362600  | H | 2.98448200  | -4.81791800 | -2.18931700 |
| H                                                                                                                                    | -2.45158700 | -1.12480300 | 2.50710900  | H | 2.36365900  | -2.43227700 | -2.09248900 |
| H                                                                                                                                    | -4.99292300 | 2.39000100  | -0.27511300 | H | 2.82412300  | -2.49278200 | 2.19335800  |
|                                                                                                                                      |             |             |             | H | 3.43717900  | -4.87978100 | 2.08989600  |

|   |             |             |             |
|---|-------------|-------------|-------------|
| H | 3.54058300  | -6.05870300 | -0.10200300 |
| C | -3.27129000 | 5.00658200  | -0.05781800 |
| C | -3.21595000 | 4.34301200  | 1.17031300  |
| C | -2.87408200 | 2.98779400  | 1.22727300  |
| C | -2.59065900 | 2.27528300  | 0.05416300  |
| C | -2.61966900 | 2.95280800  | -1.17254000 |
| C | -2.96322300 | 4.30870500  | -1.22761700 |
| H | -3.54075400 | 6.05870800  | -0.10131500 |
| H | -3.43700400 | 4.87966000  | 2.09049800  |
| H | -2.82389200 | 2.49266200  | 2.19372800  |
| H | -2.36402500 | 2.43243100  | -2.09218600 |
| H | -2.98492600 | 4.81805900  | -2.18878500 |

**$\alpha$ -10<sub>tBu</sub> [( $\mu$ -I)<sub>2</sub>Pd<sub>2</sub>(P'<sup>t</sup>Bu<sub>3</sub>)<sub>2</sub>(Ph)<sub>2</sub>]**

|    |             |             |             |
|----|-------------|-------------|-------------|
| Pd | -2.11002200 | -0.41788600 | -0.12739900 |
| Pd | 2.11001600  | 0.41781300  | -0.12750100 |
| I  | 0.25376000  | -1.78621800 | -0.49055400 |
| I  | -0.25374300 | 1.78597200  | -0.49141200 |
| P  | -4.31357800 | 0.69080300  | 0.16124800  |
| P  | 4.31361100  | -0.69070900 | 0.16141000  |
| C  | -4.08001700 | 2.19607500  | 1.41367600  |
| C  | -4.85753600 | 1.39490000  | -1.57777600 |
| C  | -5.83243800 | -0.35226100 | 0.86617900  |
| C  | -3.15669700 | 1.69115400  | 2.54903000  |
| C  | -3.36455700 | 3.39237500  | 0.74897900  |
| C  | -5.37010500 | 2.77796300  | 2.03514600  |
| C  | -5.41082500 | 0.24565100  | -2.45011300 |
| C  | -5.91576700 | 2.51924800  | -1.53991100 |
| C  | -3.60564300 | 1.92633400  | -2.30964600 |
| C  | -6.00967700 | -1.72403200 | 0.16751000  |
| C  | -7.19646500 | 0.36801400  | 0.73667600  |
| C  | -5.56801700 | -0.68616600 | 2.35236400  |
| H  | -2.17932200 | 1.38941400  | 2.16258600  |
| H  | -3.57812400 | 0.85019200  | 3.10311300  |
| H  | -2.99630200 | 2.51088700  | 3.26232100  |
| H  | -2.42706500 | 3.11859600  | 0.27040100  |
| H  | -3.11675700 | 4.11401100  | 1.53847800  |
| H  | -3.99329900 | 3.91478000  | 0.02527800  |
| H  | -5.91881200 | 2.07387100  | 2.66101100  |
| H  | -6.05266400 | 3.18023700  | 1.28124700  |
| H  | -5.07823200 | 3.61569600  | 2.68240000  |
| H  | -6.40464600 | -0.08232800 | -2.13761400 |
| H  | -4.74303500 | -0.62122700 | -2.46643900 |
| H  | -5.50127500 | 0.61096700  | -3.48136300 |
| H  | -6.85188700 | 2.21217900  | -1.07159900 |
| H  | -6.14881200 | 2.80630600  | -2.57431700 |
| H  | -5.55997000 | 3.41878100  | -1.03409600 |
| H  | -3.12919300 | 2.76511500  | -1.80167000 |
| H  | -3.91078500 | 2.27488800  | -3.30559500 |
| H  | -2.85132300 | 1.14582900  | -2.44204000 |
| H  | -5.24292900 | -2.43427300 | 0.46081600  |
| H  | -6.02890800 | -1.67445800 | -0.91910200 |
| H  | -6.97747200 | -2.12910100 | 0.49328100  |
| H  | -7.20746800 | 1.39193000  | 1.10456200  |
| H  | -7.93372900 | -0.19782300 | 1.32171500  |
| H  | -7.55153000 | 0.37046200  | -0.29749000 |
| H  | -4.60143600 | -1.17907200 | 2.48550000  |

|   |             |             |             |
|---|-------------|-------------|-------------|
| H | -6.34087800 | -1.39126600 | 2.68558300  |
| H | -5.61645000 | 0.17908700  | 3.01455300  |
| C | 5.83242600  | 0.35256600  | 0.86612600  |
| C | 6.00948000  | 1.72427100  | 0.16727300  |
| H | 5.24289700  | 2.43458000  | 0.46085600  |
| H | 6.02822400  | 1.67462200  | -0.91934200 |
| H | 6.97743900  | 2.12930300  | 0.49259900  |
| C | 5.56811000  | 0.68664000  | 2.35229100  |
| H | 4.60151500  | 1.17950900  | 2.48545100  |
| H | 6.34095900  | 1.39183100  | 2.68534900  |
| H | 5.61665200  | -0.17852300 | 3.01458800  |
| C | 7.19649200  | -0.36763600 | 0.73660900  |
| H | 7.55148400  | -0.37019200 | -0.29758100 |
| H | 7.20758100  | -1.39150800 | 1.10462100  |
| H | 7.93376300  | 0.19831800  | 1.32152600  |
| C | 4.08018000  | -2.19581300 | 1.41406100  |
| C | 3.36477000  | -3.39225300 | 0.74956200  |
| H | 3.99351700  | -3.91473500 | 0.02592200  |
| H | 2.42725000  | -3.11859500 | 0.27096900  |
| H | 3.11702900  | -4.11378400 | 1.53917600  |
| C | 5.37033100  | -2.77752800 | 2.03556300  |
| H | 6.05280600  | -3.18000600 | 1.28169600  |
| H | 5.07852600  | -3.61508100 | 2.68308100  |
| H | 5.91910900  | -2.07326300 | 2.66116600  |
| C | 3.15686200  | -1.69078300 | 2.54937000  |
| H | 3.57830400  | -0.84979500 | 3.10340100  |
| H | 2.99643200  | -2.51046100 | 3.26271700  |
| H | 2.17950000  | -1.38904300 | 2.16289100  |
| C | 4.85757500  | -1.39504900 | -1.57751100 |
| C | 3.60568200  | -1.92662700 | -2.30927700 |
| H | 2.85130400  | -1.14618100 | -2.44169800 |
| H | 3.12931600  | -2.76539700 | -1.80120400 |
| H | 3.91079700  | -2.27524300 | -3.30521300 |
| C | 5.91583600  | -2.51936400 | -1.53947500 |
| H | 6.85193400  | -2.21221100 | -1.07117300 |
| H | 6.14892000  | -2.80654700 | -2.57383800 |
| H | 5.56004800  | -3.41884200 | -1.03355700 |
| C | 5.41082000  | -0.24592200 | -2.45003700 |
| H | 4.74297300  | 0.62090900  | -2.46653300 |
| H | 5.50131300  | -0.61141800 | -3.48121900 |
| H | 6.40461300  | 0.08217800  | -2.13757500 |
| C | 3.24033400  | 4.28160900  | 1.34260300  |
| C | 2.85671700  | 2.93804200  | 1.25794500  |
| C | 2.84166100  | 2.27845100  | 0.02103500  |
| C | 3.18258100  | 2.99729400  | -1.13281800 |
| C | 3.56338800  | 4.34086500  | -1.04662400 |
| C | 3.60178200  | 4.98627600  | 0.19193700  |
| H | 3.24808200  | 4.77700500  | 2.31119800  |
| H | 2.55301800  | 2.41515800  | 2.16132600  |
| H | 3.14257000  | 2.51896200  | -2.10807300 |
| H | 3.82475800  | 4.88306700  | -1.95281400 |
| H | 3.89739100  | 6.03009100  | 0.25780300  |
| C | -3.60205200 | -4.98624200 | 0.19232500  |
| C | -3.56354300 | -4.34091700 | -1.04627800 |
| C | -3.18265200 | -2.99737300 | -1.13253900 |
| C | -2.84176800 | -2.27847100 | 0.02128800  |
| C | -2.85694800 | -2.93797600 | 1.25824300  |

|                                                                                                                  |             |             |             |   |             |             |             |
|------------------------------------------------------------------------------------------------------------------|-------------|-------------|-------------|---|-------------|-------------|-------------|
| C                                                                                                                | -3.24064400 | -4.28151600 | 1.34296700  | H | -5.36020200 | 1.45266800  | -3.11103200 |
| H                                                                                                                | -3.89772300 | -6.03003600 | 0.25824300  | H | -6.47926500 | 0.71172600  | -1.97502700 |
| H                                                                                                                | -3.82488300 | -4.88316600 | -1.95244700 | C | -4.02476300 | 4.43413500  | -0.50567300 |
| H                                                                                                                | -3.14255700 | -2.51910800 | -2.10782200 | H | -4.87904800 | 5.12230400  | -0.45206000 |
| H                                                                                                                | -2.55328300 | -2.41504700 | 2.16161100  | H | -3.46823000 | 4.54615500  | 0.43595500  |
| H                                                                                                                | -3.24848600 | -4.77684500 | 2.31159500  | C | -3.95525700 | -3.14943700 | 0.81676200  |
| <i>s</i> - <b>10</b> <sub>SP</sub> [(μ-Br) <sub>2</sub> Pd <sub>2</sub> (SPhos) <sub>2</sub> (Ph) <sub>2</sub> ] |             |             |             | H | -3.96744500 | -2.50367400 | 1.68920400  |
| Pd                                                                                                               | -1.92634300 | -1.22721500 | -0.22732900 | C | -3.55028500 | -0.61218400 | -3.34479400 |
| Pd                                                                                                               | 1.92743400  | -1.22733100 | 0.22560900  | H | -3.13834600 | 0.33955300  | -3.69943500 |
| Br                                                                                                               | 0.00233100  | 0.59588300  | -0.01452100 | H | -2.70705500 | -1.20024900 | -2.96845400 |
| Br                                                                                                               | 0.00031400  | -2.91865100 | 0.00150300  | C | -2.48754400 | 2.35968900  | -1.94203900 |
| P                                                                                                                | -3.76108200 | 0.16986900  | -0.59406000 | H | -1.64743400 | 1.66823000  | -2.04611800 |
| P                                                                                                                | 3.76015700  | 0.17148800  | 0.59555300  | H | -3.10325700 | 2.27701100  | -2.84751500 |
| C                                                                                                                | -1.77355900 | 2.67957100  | 3.92717300  | C | -4.72765400 | -5.16464400 | -0.29429700 |
| H                                                                                                                | -0.96960300 | 3.22141000  | 4.41826500  | H | -5.32105500 | -6.07559700 | -0.29105800 |
| C                                                                                                                | -1.63318500 | 1.31585800  | 3.69400100  | C | -4.71864100 | -4.32338800 | 0.81938300  |
| H                                                                                                                | -0.73334400 | 0.80275800  | 4.00747000  | H | -5.30967100 | -4.57429200 | 1.69784300  |
| O                                                                                                                | -2.65245300 | -0.72905200 | 2.86403100  | C | -3.95728000 | -4.82872600 | -1.40993400 |
| C                                                                                                                | -3.34372700 | 2.00749800  | -0.70535600 | H | -3.94049700 | -5.48247400 | -2.27957200 |
| H                                                                                                                | -2.70992500 | 2.15528100  | 0.17867400  | C | -3.11008600 | 4.81053400  | -1.68044800 |
| C                                                                                                                | -5.09932700 | 0.02931800  | 0.70541100  | H | -2.71237300 | 5.82482700  | -1.54434100 |
| C                                                                                                                | -4.57575700 | -0.36198200 | -2.21253700 | H | -3.70325100 | 4.82992700  | -2.60734000 |
| H                                                                                                                | -4.96106600 | -1.35619900 | -1.95170500 | C | -4.22399400 | -1.33874300 | -4.52171500 |
| C                                                                                                                | -7.29761100 | -0.90567600 | 1.27842200  | H | -3.49284800 | -1.49750400 | -5.32524100 |
| H                                                                                                                | -8.17225800 | -1.47161100 | 0.96971700  | H | -4.54580300 | -2.33571100 | -4.18805700 |
| C                                                                                                                | -2.66976600 | 0.61724400  | 3.05650400  | C | -5.43672500 | -0.55985200 | -5.05508400 |
| C                                                                                                                | -3.96300000 | 2.65468800  | 2.92764600  | H | -5.08990300 | 0.37921400  | -5.51189800 |
| C                                                                                                                | -3.83000000 | 1.28496000  | 2.61185000  | H | -5.93520700 | -1.12799600 | -5.85082000 |
| C                                                                                                                | -2.93312200 | 3.36120200  | 3.56091400  | C | -6.43161700 | -0.23279600 | -3.93173800 |
| H                                                                                                                | -3.03098800 | 4.41780400  | 3.77717300  | H | -6.88876800 | -1.16422000 | -3.56600800 |
| C                                                                                                                | -6.26126600 | -0.69319000 | 0.37253300  | H | -7.25172900 | 0.38663100  | -4.31732200 |
| H                                                                                                                | -6.36868900 | -1.12360700 | -0.61337900 | C | 1.78131000  | 2.67562600  | -3.93588000 |
| C                                                                                                                | -3.18108700 | -2.80183200 | -0.29973600 | H | 0.97867100  | 3.21578400  | -4.43097800 |
| O                                                                                                                | -5.16037900 | 3.22695100  | 2.58893100  | C | 1.64251900  | 1.31170700  | -3.70326600 |
| C                                                                                                                | -7.19548600 | -0.39824700 | 2.56983400  | H | 0.74510600  | 0.79686700  | -4.02087400 |
| H                                                                                                                | -7.99059500 | -0.55276600 | 3.29429200  | O | 2.66137000  | -0.73106500 | -2.86756600 |
| C                                                                                                                | -1.53498200 | -1.47663400 | 3.34185600  | C | 3.33899800  | 2.00824200  | 0.70592500  |
| H                                                                                                                | -0.61211000 | -1.17282700 | 2.83815100  | H | 2.71105600  | 2.15559200  | -0.18236200 |
| H                                                                                                                | -1.74805400 | -2.51514700 | 3.08891600  | C | 5.10183500  | 0.03332600  | -0.70054900 |
| H                                                                                                                | -1.43195800 | -1.36923200 | 4.42958200  | C | 4.57163900  | -0.35992600 | 2.21590500  |
| C                                                                                                                | -5.42037100 | 4.55725900  | 3.00741200  | H | 4.96017800  | -1.35284400 | 1.95487600  |
| H                                                                                                                | -5.33371600 | 4.65842500  | 4.09696500  | C | 7.30354400  | -0.89718700 | -1.26781700 |
| H                                                                                                                | -6.44758100 | 4.76791800  | 2.70368300  | H | 8.17892200  | -1.46060100 | -0.95657500 |
| H                                                                                                                | -4.74732300 | 5.27571000  | 2.52267900  | C | 2.67729400  | 0.61510500  | -3.06054200 |
| C                                                                                                                | -1.96315700 | 3.80195400  | -1.83651100 | C | 3.96606000  | 2.65523400  | -2.92596300 |
| H                                                                                                                | -1.36262900 | 4.04048600  | -2.72410200 | C | 3.83438500  | 1.28515400  | -2.61113000 |
| H                                                                                                                | -1.28526900 | 3.87039100  | -0.97410200 | C | 2.93768200  | 3.35966500  | -3.56402600 |
| C                                                                                                                | -4.98955700 | 0.52742500  | 2.03280900  | H | 3.03440800  | 4.41645900  | -3.77987000 |
| C                                                                                                                | -4.53613500 | 2.98511500  | -0.61056700 | C | 6.26485100  | -0.68595600 | -0.36432300 |
| H                                                                                                                | -5.16869500 | 2.75803900  | 0.24929200  | H | 6.37137900  | -1.11476900 | 0.62239900  |
| H                                                                                                                | -5.16220300 | 2.89346800  | -1.50630400 | C | 3.18391000  | -2.80053700 | 0.29985400  |
| C                                                                                                                | -3.18817000 | -3.65935800 | -1.41221200 | O | 5.16071400  | 3.22986700  | -2.58162100 |
| H                                                                                                                | -2.57240600 | -3.43792900 | -2.27951800 | C | 7.20280700  | -0.39172200 | -2.56010400 |
| C                                                                                                                | -6.05006000 | 0.30476600  | 2.92804100  | H | 7.99969600  | -0.54538000 | -3.28279100 |
| H                                                                                                                | -5.95505000 | 0.69838800  | 3.93570700  | C | 1.54478000  | -1.48012000 | -3.34501400 |
| C                                                                                                                | -5.74562200 | 0.48813600  | -2.75655800 | H | 0.62103000  | -1.17477600 | -2.84384100 |
|                                                                                                                  |             |             |             | H | 1.75756400  | -2.51781200 | -3.08855300 |

|                                                                                                          |            |             |             |    |           |          |           |
|----------------------------------------------------------------------------------------------------------|------------|-------------|-------------|----|-----------|----------|-----------|
| H                                                                                                        | 1.44363500 | -1.37604600 | -4.43319300 | Cl | 0.000000  | 0.000000 | -0.395262 |
| C                                                                                                        | 5.41951500 | 4.56105100  | -2.99797900 | O  | 2.434028  | 2.885267 | 0.850758  |
| H                                                                                                        | 5.33856200 | 4.66253600  | -4.08795800 | C  | -1.087350 | 3.045717 | -1.937578 |
| H                                                                                                        | 6.44448000 | 4.77423900  | -2.68851100 | H  | -0.106343 | 2.566051 | -2.045797 |
| H                                                                                                        | 4.74192400 | 5.27750900  | -2.51663300 | C  | 0.000000  | 5.028379 | 0.026046  |
| C                                                                                                        | 1.94644500 | 3.79820700  | 1.82922500  | C  | -2.824970 | 4.109900 | 0.359832  |
| H                                                                                                        | 1.33902800 | 4.03436700  | 2.71274800  | H  | -2.651144 | 4.546606 | 1.351959  |
| H                                                                                                        | 1.27457200 | 3.86602300  | 0.96207900  | C  | 0.243024  | 7.299425 | 0.928624  |
| C                                                                                                        | 4.99373400 | 0.52986500  | -2.02865700 | H  | -0.195300 | 8.132681 | 1.470969  |
| C                                                                                                        | 4.52981100 | 2.98853700  | 0.61999500  | C  | 2.661976  | 2.926314 | -0.488641 |
| H                                                                                                        | 5.16793800 | 2.76374100  | -0.23638700 | C  | 2.415816  | 4.182147 | -2.539323 |
| H                                                                                                        | 5.15052000 | 2.89714700  | 1.51944400  | C  | 2.086677  | 4.015572 | -1.176228 |
| C                                                                                                        | 3.18982900 | -3.65950600 | 1.41124600  | C  | 3.204900  | 3.246598 | -3.219727 |
| H                                                                                                        | 2.57180300 | -3.44012300 | 2.27745200  | H  | 3.436149  | 3.369515 | -4.270535 |
| C                                                                                                        | 6.05658300 | 0.30840000  | -2.92143300 | C  | -0.506601 | 6.144628 | 0.718833  |
| H                                                                                                        | 5.96279500 | 0.70069400  | -3.92973800 | H  | -1.507997 | 6.121425 | 1.126040  |
| C                                                                                                        | 5.73764200 | 0.49250600  | 2.76468500  | C  | -0.783420 | 3.031795 | 2.867909  |
| H                                                                                                        | 5.34847500 | 1.45525300  | 3.11995800  | O  | 1.925892  | 5.315610 | -3.131378 |
| H                                                                                                        | 6.47279300 | 0.71976100  | 1.98566500  | C  | 1.547028  | 7.367956 | 0.448263  |
| C                                                                                                        | 4.01590100 | 4.43659300  | 0.51360800  | H  | 2.151467  | 8.257945 | 0.601499  |
| H                                                                                                        | 4.86898100 | 5.12674100  | 0.46666300  | C  | 3.069266  | 1.867963 | 1.624241  |
| H                                                                                                        | 3.46555000 | 4.54859700  | -0.43164500 | H  | 2.733783  | 0.871238 | 1.321401  |
| C                                                                                                        | 3.96112100 | -3.14552300 | -0.81533000 | H  | 2.758758  | 2.045608 | 2.653575  |
| H                                                                                                        | 3.97428700 | -2.49869600 | -1.68696500 | H  | 4.161346  | 1.944901 | 1.541916  |
| C                                                                                                        | 3.54368300 | -0.61420600 | 3.34500900  | C  | 2.328060  | 5.619733 | -4.457307 |
| H                                                                                                        | 3.12867300 | 0.33608100  | 3.69995400  | H  | 3.420196  | 5.696037 | -4.537681 |
| H                                                                                                        | 2.70281900 | -1.20366800 | 2.96556900  | H  | 1.878793  | 6.587539 | -4.688086 |
| C                                                                                                        | 2.47341900 | 2.35712300  | 1.93688700  | H  | 1.963624  | 4.873668 | -5.174792 |
| H                                                                                                        | 1.63427900 | 1.66350900  | 2.03421700  | C  | -1.921230 | 1.456592 | -3.722246 |
| H                                                                                                        | 3.08299600 | 2.27492200  | 2.84654900  | H  | -2.687983 | 0.710078 | -3.966367 |
| C                                                                                                        | 4.73394500 | -5.16112500 | 0.29481900  | H  | -0.955846 | 0.931954 | -3.751443 |
| H                                                                                                        | 5.32870600 | -6.07119100 | 0.29171900  | C  | 1.339772  | 5.094519 | -0.445908 |
| C                                                                                                        | 4.72620700 | -4.31838700 | -0.81774100 | C  | -1.159682 | 4.214693 | -2.945529 |
| H                                                                                                        | 5.31964600 | -4.56718400 | -1.69517100 | H  | -0.421974 | 4.985271 | -2.714043 |
| C                                                                                                        | 3.96059700 | -4.82778000 | 1.40916600  | H  | -2.147929 | 4.687065 | -2.895974 |
| H                                                                                                        | 3.94275500 | -5.48271000 | 2.27789600  | C  | -1.904062 | 2.877028 | 3.699807  |
| C                                                                                                        | 3.09220200 | 4.80945300  | 1.68252400  | H  | -2.666995 | 2.141719 | 3.458836  |
| H                                                                                                        | 2.69331500 | 5.82307900  | 1.54491700  | C  | 2.075052  | 6.272186 | -0.226396 |
| H                                                                                                        | 3.67882300 | 4.82892700  | 2.61357700  | H  | 3.094350  | 6.311675 | -0.598930 |
| C                                                                                                        | 4.21588700 | -1.34104900 | 4.52261000  | C  | -3.498861 | 5.173577 | -0.532704 |
| H                                                                                                        | 3.48291200 | -1.50287100 | 5.32386500  | H  | -3.764291 | 4.724015 | -1.497916 |
| H                                                                                                        | 4.54094900 | -2.33669900 | 4.18819400  | H  | -2.818390 | 6.003388 | -0.749374 |
| C                                                                                                        | 5.42528900 | -0.56017500 | 5.06059100  | C  | -0.928768 | 3.693351 | -4.376260 |
| H                                                                                                        | 5.07497700 | 0.37724700  | 5.51812000  | H  | -0.992919 | 4.528292 | -5.086851 |
| H                                                                                                        | 5.92301100 | -1.12850600 | 5.85666700  | H  | 0.093138  | 3.294070 | -4.447106 |
| C                                                                                                        | 6.42236300 | -0.22865800 | 3.94047800  | C  | 0.200078  | 3.960994 | 3.236749  |
| H                                                                                                        | 6.88291300 | -1.15827100 | 3.57441300  | H  | 1.073947  | 4.102555 | 2.608333  |
| H                                                                                                        | 7.23983900 | 0.39222700  | 4.32930600  | C  | -3.806593 | 2.938817 | 0.604074  |
| <i>s</i> -10 <sub>SP</sub> [(μ-Cl) <sub>2</sub> Pd <sub>2</sub> (SPhos) <sub>2</sub> (Ph) <sub>2</sub> ] |            |             |             | H  | -4.066161 | 2.458316 | -0.346290 |
| C                                                                                                        | 3.707815   | 2.151626    | -2.518984   | H  | -3.330764 | 2.174329 | 1.226347  |
| H                                                                                                        | 4.322370   | 1.422590    | -3.040401   | C  | -2.154324 | 1.987360 | -2.297256 |
| C                                                                                                        | 3.454667   | 1.984079    | -1.162033   | H  | -2.138170 | 1.155334 | -1.588917 |
| H                                                                                                        | 3.873447   | 1.137835    | -0.633437   | H  | -3.151298 | 2.446261 | -2.255764 |
| P                                                                                                        | -1.094202  | 3.519109    | -0.111154   | C  | -1.056921 | 4.562148 | 5.224503  |
| Pd                                                                                                       | -0.496445  | 1.792092    | 1.315271    | H  | -1.160969 | 5.150295 | 6.132941  |
| Cl                                                                                                       | 0.000000   | 0.000000    | 2.920259    | C  | 0.065414  | 4.715235 | 4.408779  |
|                                                                                                          |            |             |             | H  | 0.842769  | 5.427303 | 4.678327  |



|    |           |           |           |
|----|-----------|-----------|-----------|
| C  | -2.041169 | 3.638462  | 4.865711  |
| H  | -2.915084 | 3.497689  | 5.498489  |
| C  | -1.927722 | 2.590806  | -4.756847 |
| H  | -1.700134 | 2.199052  | -5.757007 |
| H  | -2.938313 | 3.023188  | -4.813531 |
| C  | -5.092303 | 3.452786  | 1.275472  |
| H  | -5.788992 | 2.618196  | 1.428179  |
| H  | -4.842722 | 3.840742  | 2.273488  |
| C  | -5.763919 | 4.559018  | 0.447534  |
| H  | -6.128620 | 4.130529  | -0.498154 |
| H  | -6.644595 | 4.948304  | 0.974029  |
| C  | -4.783648 | 5.699374  | 0.134612  |
| H  | -4.519790 | 6.220497  | 1.066861  |
| H  | -5.260224 | 6.444349  | -0.515602 |
| C  | -3.707815 | -2.151626 | -2.518984 |
| H  | -4.322370 | -1.422590 | -3.040401 |
| C  | -3.454667 | -1.984079 | -1.162033 |
| H  | -3.873447 | -1.137835 | -0.633437 |
| P  | 1.094202  | -3.519109 | -0.111154 |
| Pd | 0.496445  | -1.792092 | 1.315271  |
| O  | -2.434028 | -2.885267 | 0.850758  |
| C  | 1.087350  | -3.045717 | -1.937578 |
| H  | 0.106343  | -2.566051 | -2.045797 |
| C  | 0.000000  | -5.028379 | 0.026046  |
| C  | 2.824970  | -4.109900 | 0.359832  |
| H  | 2.651144  | -4.546606 | 1.351959  |
| C  | -0.243024 | -7.299425 | 0.928624  |
| H  | 0.195300  | -8.132681 | 1.470969  |
| C  | -2.661976 | -2.926314 | -0.488641 |
| C  | -2.415816 | -4.182147 | -2.539323 |
| C  | -2.086677 | -4.015572 | -1.176228 |
| C  | -3.204900 | -3.246598 | -3.219727 |
| H  | -3.436149 | -3.369515 | -4.270535 |
| C  | 0.506601  | -6.144628 | 0.718833  |
| H  | 1.507997  | -6.121425 | 1.126040  |
| C  | 0.783420  | -3.031795 | 2.867909  |
| O  | -1.925892 | -5.315610 | -3.131378 |
| C  | -1.547028 | -7.367956 | 0.448263  |
| H  | -2.151467 | -8.257945 | 0.601499  |
| C  | -3.069266 | -1.867963 | 1.624241  |
| H  | -2.733783 | -0.871238 | 1.321401  |
| H  | -2.758758 | -2.045608 | 2.653575  |
| H  | -4.161346 | -1.944901 | 1.541916  |
| C  | -2.328060 | -5.619733 | -4.457307 |
| H  | -3.420196 | -5.696037 | -4.537681 |
| H  | -1.878793 | -6.587539 | -4.688086 |
| H  | -1.963624 | -4.873668 | -5.174792 |
| C  | 1.921230  | -1.456592 | -3.722246 |
| H  | 2.687983  | -0.710078 | -3.966367 |
| H  | 0.955846  | -0.931954 | -3.751443 |
| C  | -1.339772 | -5.094519 | -0.445908 |
| C  | 1.159682  | -4.214693 | -2.945529 |
| H  | 0.421974  | -4.985271 | -2.714043 |
| H  | 2.147929  | -4.687065 | -2.895974 |
| C  | 1.904062  | -2.877028 | 3.699807  |
| H  | 2.666995  | -2.141719 | 3.458836  |
| C  | -2.075052 | -6.272186 | -0.226396 |

|   |           |           |           |
|---|-----------|-----------|-----------|
| H | -3.094350 | -6.311675 | -0.598930 |
| C | 3.498861  | -5.173577 | -0.532704 |
| H | 3.764291  | -4.724015 | -1.497916 |
| H | 2.818390  | -6.003388 | -0.749374 |
| C | 0.928768  | -3.693351 | -4.376260 |
| H | 0.992919  | -4.528292 | -5.086851 |
| H | -0.093138 | -3.294070 | -4.447106 |
| C | -0.200078 | -3.960994 | 3.236749  |
| H | -1.073947 | -4.102555 | 2.608333  |
| C | 3.806593  | -2.938817 | 0.604074  |
| H | 4.066161  | -2.458316 | -0.346290 |
| H | 3.330764  | -2.174329 | 1.226347  |
| C | 2.154324  | -1.987360 | -2.297256 |
| H | 2.138170  | -1.155334 | -1.588917 |
| H | 3.151298  | -2.446261 | -2.255764 |
| C | 1.056921  | -4.562148 | 5.224503  |
| H | 1.160969  | -5.150295 | 6.132941  |
| C | -0.065414 | -4.715235 | 4.408779  |
| H | -0.842769 | -5.427303 | 4.678327  |
| C | 2.041169  | -3.638462 | 4.865711  |
| H | 2.915084  | -3.497689 | 5.498489  |
| C | 1.927722  | -2.590806 | -4.756847 |
| H | 1.700134  | -2.199052 | -5.757007 |
| H | 2.938313  | -3.023188 | -4.813531 |
| C | 5.092303  | -3.452786 | 1.275472  |
| H | 5.788992  | -2.618196 | 1.428179  |
| H | 4.842722  | -3.840742 | 2.273488  |
| C | 5.763919  | -4.559018 | 0.447534  |
| H | 6.128620  | -4.130529 | -0.498154 |
| H | 6.644595  | -4.948304 | 0.974029  |
| C | 4.783648  | -5.699374 | 0.134612  |
| H | 4.519790  | -6.220497 | 1.066861  |
| H | 5.260224  | -6.444349 | -0.515602 |

**11<sub>Cy</sub> [Pd(PCy<sub>3</sub>)<sub>3</sub>] (conformer F)**

|    |             |             |             |
|----|-------------|-------------|-------------|
| Pd | 0.03885100  | -0.00534600 | 0.08012000  |
| P  | 1.81376200  | -1.65380100 | -0.17078200 |
| P  | 0.62184500  | 2.35151500  | 0.21084300  |
| P  | -2.33264800 | -0.68605100 | 0.07295200  |
| C  | 1.80710800  | -2.62014800 | -1.81020600 |
| C  | 1.71347900  | -3.06360800 | 1.10514900  |
| C  | 3.64381700  | -1.05694400 | -0.16481400 |
| C  | 4.74018400  | -1.92548100 | -0.82623400 |
| C  | 6.09209700  | -1.18558100 | -0.86892200 |
| C  | 6.54466000  | -0.72491900 | 0.52309800  |
| C  | 5.45568600  | 0.11591100  | 1.20279900  |
| C  | 4.11350600  | -0.63463500 | 1.24331900  |
| C  | 2.79451500  | -4.16454000 | 1.09859600  |
| C  | 2.43668400  | -5.30593200 | 2.06934400  |
| C  | 2.21259600  | -4.78301700 | 3.49553100  |
| C  | 1.15065600  | -3.67331800 | 3.51834400  |
| C  | 1.49253000  | -2.53461400 | 2.54131400  |
| C  | 1.94827800  | -1.65519300 | -3.00842200 |
| C  | 1.99570600  | -2.40584300 | -4.35058300 |
| C  | 0.76841300  | -3.30817400 | -4.53777000 |
| C  | 0.59823900  | -4.25918000 | -3.34505300 |
| C  | 0.55555400  | -3.49454300 | -2.00968800 |

|   |             |             |             |   |             |             |             |
|---|-------------|-------------|-------------|---|-------------|-------------|-------------|
| C | 0.95195600  | 3.02149700  | 1.96311400  | H | 0.69466500  | -1.78152600 | 2.53664200  |
| C | -3.35749700 | -0.07656800 | 1.56554300  | H | 2.39716600  | -2.02719600 | 2.89795600  |
| C | -0.68236000 | 3.61287700  | -0.40638400 | H | 1.09248400  | -0.96579100 | -3.00356500 |
| C | 2.26260500  | 2.80299100  | -0.65573000 | H | 2.84521900  | -1.03325200 | -2.90843100 |
| C | -2.66256100 | -2.56585400 | -0.00655500 | H | 2.90732600  | -3.02111200 | -4.39003100 |
| C | -3.16230600 | 0.05885800  | -1.47238000 | H | 2.06993500  | -1.68646100 | -5.17679700 |
| C | 2.11794900  | 2.29364000  | 2.66151700  | H | -0.13030700 | -2.68018700 | -4.62978300 |
| C | -0.57861900 | 5.10090300  | -0.00139100 | H | 0.84994500  | -3.87726700 | -5.47298600 |
| C | -0.92986200 | 3.50787500  | -1.92623300 | H | 1.43572200  | -4.97259200 | -3.32779200 |
| C | 2.75033200  | 4.26639600  | -0.63075200 | H | -0.31651700 | -4.85581200 | -3.46011400 |
| C | 2.34526700  | 2.25054500  | -2.09534900 | H | 0.44324600  | -4.21181000 | -1.18827300 |
| C | -1.84302200 | 5.87754300  | -0.41670400 | H | -0.33055200 | -2.84837000 | -1.98938000 |
| C | -2.12204900 | 5.75237800  | -1.92057300 | H | 1.22675500  | 4.08200900  | 1.87603600  |
| C | -2.19248000 | 4.27933800  | -2.34885200 | H | -2.69598900 | -0.34379700 | 2.40477800  |
| C | 3.76707300  | 2.37800400  | -2.67071300 | H | -1.58928200 | 3.22152400  | 0.07520400  |
| C | 4.27799100  | 3.82527900  | -2.61348600 | H | 2.97868400  | 2.21283300  | -0.06382800 |
| C | 4.18017200  | 4.39025500  | -1.18959100 | H | -1.90886700 | -2.88021700 | -0.73988100 |
| C | 2.37335900  | 2.83481600  | 4.07953800  | H | -2.82594600 | 1.10363000  | -1.40578900 |
| C | 1.11228100  | 2.76128100  | 4.95018400  | H | 3.03892200  | 2.38071200  | 2.07416800  |
| C | -0.06221100 | 3.47359100  | 4.26754900  | H | 1.87813500  | 1.22335100  | 2.71687000  |
| C | -0.30828800 | 2.93031400  | 2.84911700  | H | -0.43589000 | 5.20887800  | 1.07863400  |
| C | -3.44989500 | 1.46339500  | 1.55165700  | H | 0.29244800  | 5.56462100  | -0.47865400 |
| C | -4.74684000 | -0.67923800 | 1.88034500  | H | -1.01047700 | 2.45545700  | -2.22480400 |
| C | -4.01008900 | -3.13364200 | -0.50627100 | H | -0.07167100 | 3.92591600  | -2.46887000 |
| C | -2.25600200 | -3.21860900 | 1.33455200  | H | 2.08382700  | 4.88594200  | -1.24459300 |
| C | -4.69977000 | 0.09995700  | -1.62522100 | H | 2.71786100  | 4.67900000  | 0.38404700  |
| C | -2.50340500 | -0.52962100 | -2.74183700 | H | 1.65603700  | 2.80082100  | -2.74782100 |
| C | -4.01842700 | 2.02360200  | 2.86473300  | H | 2.01738700  | 1.20584200  | -2.10721300 |
| C | -5.39037200 | 1.41613700  | 3.18721500  | H | -2.70568700 | 5.48907700  | 0.14546900  |
| C | -5.31847800 | -0.11638600 | 3.19658000  | H | -1.73915100 | 6.93387200  | -0.13501700 |
| C | -2.23615600 | -4.75383300 | 1.24882000  | H | -1.31659100 | 6.25198900  | -2.47965200 |
| C | -3.58341400 | -5.30592200 | 0.76507000  | H | -3.05253400 | 6.27287300  | -2.18213000 |
| C | -3.98084700 | -4.67365500 | -0.57552500 | H | -2.33046700 | 4.20464100  | -3.43580700 |
| C | -2.93490500 | 0.21446300  | -4.01654300 | H | -3.07464800 | 3.80972900  | -1.88826600 |
| C | -4.46267100 | 0.25386600  | -4.15917800 | H | 3.78568100  | 2.00829100  | -3.70461700 |
| C | -5.11405900 | 0.85248000  | -2.90508700 | H | 4.45054200  | 1.73447200  | -2.09691600 |
| H | 2.67663800  | -3.29096900 | -1.80859900 | H | 5.31214500  | 3.88122200  | -2.97751900 |
| H | 0.76820900  | -3.54337400 | 0.81322000  | H | 3.67406500  | 4.44870200  | -3.28983300 |
| H | 3.56934500  | -0.13621500 | -0.76124000 | H | 4.87411800  | 3.84459000  | -0.53264600 |
| H | 4.86453900  | -2.86392100 | -0.27216900 | H | 4.49779300  | 5.44133600  | -1.17339500 |
| H | 4.46468100  | -2.20199900 | -1.84854500 | H | 3.19394800  | 2.27430000  | 4.54663600  |
| H | 5.99908200  | -0.30840700 | -1.52680200 | H | 2.70800600  | 3.88115000  | 4.01417500  |
| H | 6.85348500  | -1.83383800 | -1.32288400 | H | 1.30298500  | 3.19618800  | 5.93992800  |
| H | 6.75852400  | -1.60765700 | 1.14431600  | H | 0.84832400  | 1.70594300  | 5.11579500  |
| H | 7.48224400  | -0.15821200 | 0.45265100  | H | -0.97577900 | 3.36778400  | 4.86740200  |
| H | 5.32903100  | 1.06078300  | 0.65339200  | H | 0.15090400  | 4.55182900  | 4.21150500  |
| H | 5.76233300  | 0.38651500  | 2.22206500  | H | -0.61850400 | 1.87809800  | 2.90945800  |
| H | 3.35295900  | -0.01663000 | 1.72863800  | H | -1.14341000 | 3.47618300  | 2.39670300  |
| H | 4.24145800  | -1.52824700 | 1.86878200  | H | -2.45878400 | 1.88097900  | 1.36220900  |
| H | 3.76019800  | -3.74014300 | 1.40181000  | H | -4.09518100 | 1.78786700  | 0.72351700  |
| H | 2.93327200  | -4.57080300 | 0.08919700  | H | -4.69317700 | -1.76790000 | 1.96207100  |
| H | 1.52191400  | -5.80604100 | 1.71788100  | H | -5.44721500 | -0.46186000 | 1.06482600  |
| H | 3.23006600  | -6.06510700 | 2.06112200  | H | -4.83339400 | -2.82046600 | 0.14518300  |
| H | 3.16118200  | -4.38457200 | 3.88593100  | H | -4.23695300 | -2.74527500 | -1.50332500 |
| H | 1.92142200  | -5.60503700 | 4.16238000  | H | -2.96001800 | -2.92639500 | 2.12501500  |
| H | 0.17566000  | -4.10390200 | 3.24772000  | H | -1.27345600 | -2.84366900 | 1.64018900  |
| H | 1.04225400  | -3.27164100 | 4.53473500  | H | -5.11326500 | -0.91365200 | -1.66170800 |

|                                                          |             |             |             |   |             |             |             |
|----------------------------------------------------------|-------------|-------------|-------------|---|-------------|-------------|-------------|
| H                                                        | -5.15956100 | 0.59170900  | -0.76228600 | C | 1.27570600  | 3.86199800  | -0.06687700 |
| H                                                        | -2.77706600 | -1.58984900 | -2.84392900 | C | 2.04571600  | 4.96859900  | -0.42009900 |
| H                                                        | -1.41251500 | -0.49407100 | -2.63458900 | H | 2.15678500  | 6.76032500  | -1.62059300 |
| H                                                        | -3.32073800 | 1.79987600  | 3.68536000  | H | -0.10559800 | 6.43864800  | -2.60518500 |
| H                                                        | -4.08938300 | 3.11789600  | 2.80405300  | H | -1.47929600 | 4.49684700  | -1.95758200 |
| H                                                        | -6.11772800 | 1.74047100  | 2.42776700  | H | 1.67964500  | 3.13127700  | 0.62831300  |
| H                                                        | -5.75926900 | 1.78782400  | 4.15203800  | H | 3.03717600  | 5.09156500  | 0.00710200  |
| H                                                        | -6.31308700 | -0.54474600 | 3.37854300  | C | -2.33697400 | 3.33912800  | 4.24136100  |
| H                                                        | -4.68189200 | -0.44252000 | 4.03290800  | C | -2.04567100 | 4.34862400  | 3.32110300  |
| H                                                        | -1.97769400 | -5.17897200 | 2.22781100  | C | -1.62947000 | 4.02376700  | 2.02826400  |
| H                                                        | -1.44566500 | -5.07005400 | 0.55174300  | C | -1.50044000 | 2.68202100  | 1.63275800  |
| H                                                        | -3.54043900 | -6.39903600 | 0.67386700  | C | -1.78373100 | 1.67685500  | 2.57262800  |
| H                                                        | -4.35682700 | -5.08431000 | 1.51591000  | C | -2.20372900 | 2.00149100  | 3.86416000  |
| H                                                        | -3.25959800 | -4.98507300 | -1.34621900 | H | -2.65829500 | 3.59425500  | 5.24793900  |
| H                                                        | -4.96161600 | -5.04644800 | -0.89951900 | H | -2.13941600 | 5.39267400  | 3.60942900  |
| H                                                        | -2.54910000 | 1.24398000  | -3.98126400 | H | -1.39674200 | 4.81875800  | 1.32601000  |
| H                                                        | -2.47991000 | -0.25975100 | -4.89642600 | H | -1.65958000 | 0.63514700  | 2.28773000  |
| H                                                        | -4.83989500 | -0.76873700 | -4.31142200 | H | -2.41723600 | 1.20794600  | 4.57572900  |
| H                                                        | -4.74970300 | 0.82816600  | -5.04965400 | C | 4.06328500  | 0.25372300  | 4.25752200  |
| H                                                        | -6.20794700 | 0.84347000  | -3.00073100 | C | 4.77033100  | -0.52495100 | 3.33863900  |
| H                                                        | -4.81759900 | 1.90836100  | -2.81516100 | C | 4.28764700  | -0.69235600 | 2.03878200  |
| <b>11<sub>H</sub> [Pd(PH<sub>3</sub>)<sub>3</sub>]</b>   |             |             |             | C | 3.08852200  | -0.08166500 | 1.63551000  |
| Pd                                                       | 0.00535700  | -0.00488600 | -0.00130500 | C | 2.38117000  | 0.68875500  | 2.57376800  |
| P                                                        | -1.62871200 | -1.67398500 | -0.00615700 | C | 2.86636400  | 0.86024100  | 3.87172600  |
| P                                                        | -0.65627700 | 2.23404600  | 0.00031900  | H | 4.43968800  | 0.38079300  | 5.26932300  |
| P                                                        | 2.27801200  | -0.55287100 | 0.00477800  | H | 5.69971000  | -1.00609500 | 3.63309700  |
| H                                                        | -1.41604300 | -2.98804700 | -0.50924100 | H | 4.84415200  | -1.30721000 | 1.33772800  |
| H                                                        | -2.12988400 | -2.10736100 | 1.25096000  | H | 1.43760400  | 1.14312700  | 2.28297100  |
| H                                                        | -2.91185600 | -1.53744600 | -0.60620800 | H | 2.30254300  | 1.46009000  | 4.58161200  |
| H                                                        | 0.21967100  | 3.35659500  | 0.00071300  | C | 4.63772100  | 2.90153200  | -2.67040300 |
| H                                                        | -1.48056200 | 2.73746700  | -1.04280500 | C | 5.16854800  | 2.54796000  | -1.42878300 |
| H                                                        | -1.47178200 | 2.73035600  | 1.05351000  | C | 4.51844100  | 1.60569500  | -0.62699900 |
| H                                                        | 3.04370000  | -0.28096700 | -1.16130300 | C | 3.32117100  | 1.01114700  | -1.05244200 |
| H                                                        | 3.19304000  | 0.06595800  | 0.90034200  | C | 2.78918100  | 1.38814100  | -2.29662500 |
| H                                                        | 2.81194200  | -1.85962500 | 0.18995800  | C | 3.44546500  | 2.31662300  | -3.10405700 |
| <b>11<sub>Ph</sub> [Pd(PPh<sub>3</sub>)<sub>3</sub>]</b> |             |             |             | H | 5.14503100  | 3.63383900  | -3.29310800 |
| Pd                                                       | 0.01692600  | -0.00151600 | -0.09855200 | H | 6.09367800  | 3.00206500  | -1.08198200 |
| P                                                        | -0.96070500 | 2.16479200  | -0.06964600 | H | 4.94696000  | 1.33558800  | 0.33329100  |
| P                                                        | 2.37587100  | -0.25247100 | -0.07364200 | H | 1.84276100  | 0.96077100  | -2.61993500 |
| P                                                        | -1.40055800 | -1.90688900 | -0.06176000 | H | 3.01732400  | 2.59633800  | -4.06306900 |
| C                                                        | -4.78017200 | 2.50516500  | -2.73520100 | C | 4.32513500  | -4.29105000 | -1.40820800 |
| C                                                        | -4.75309700 | 3.17560000  | -1.51112900 | C | 4.86323600  | -3.09282200 | -1.87778700 |
| C                                                        | -3.62554700 | 3.09724700  | -0.68939700 | C | 4.30488100  | -1.86992800 | -1.49373200 |
| C                                                        | -2.51095500 | 2.33854600  | -1.07700800 | C | 3.19267500  | -1.82801700 | -0.63923200 |
| C                                                        | -2.55708100 | 1.65750900  | -2.30447500 | C | 2.65349200  | -3.04292100 | -0.18451600 |
| C                                                        | -3.67644100 | 1.74665900  | -3.13173000 | C | 3.21770700  | -4.26201400 | -0.55665200 |
| H                                                        | -5.65822600 | 2.56698000  | -3.37286100 | H | 4.76032300  | -5.24104800 | -1.70773100 |
| H                                                        | -5.60984500 | 3.76489200  | -1.19324900 | H | 5.72330000  | -3.10405800 | -2.54295600 |
| H                                                        | -3.61856400 | 3.62799000  | 0.25764600  | H | 4.74204700  | -0.94752100 | -1.86167900 |
| H                                                        | -1.71239200 | 1.03921900  | -2.59913400 | H | 1.77779700  | -3.03311500 | 0.45780500  |
| H                                                        | -3.69335100 | 1.21054800  | -4.07703300 | H | 2.77997800  | -5.18876800 | -0.19590400 |
| C                                                        | 1.55352500  | 5.90187500  | -1.33646100 | C | 0.06071800  | -5.35593800 | -2.85342100 |
| C                                                        | 0.28622000  | 5.71985700  | -1.88953700 | C | -0.48078900 | -5.68159900 | -1.60866600 |
| C                                                        | -0.49158900 | 4.61662100  | -1.52463800 | C | -0.92994000 | -4.67455900 | -0.75010900 |
| C                                                        | -0.00818300 | 3.67290800  | -0.60582500 | C | -0.83351100 | -3.32465500 | -1.11999800 |
|                                                          |             |             |             | C | -0.27255600 | -3.01022700 | -2.36905300 |
|                                                          |             |             |             | C | 0.16115000  | -4.01550200 | -3.23312600 |

|                                                          |             |             |             |   |             |             |             |
|----------------------------------------------------------|-------------|-------------|-------------|---|-------------|-------------|-------------|
| H                                                        | 0.40870300  | -6.14043500 | -3.52039700 | C | -4.43789700 | 0.09717800  | 2.27814600  |
| H                                                        | -0.55899900 | -6.72228000 | -1.30342500 | H | -6.31390000 | 0.89632800  | 2.96722700  |
| H                                                        | -1.35320700 | -4.94527100 | 0.21229300  | H | -4.91182400 | -0.73973600 | 1.77668300  |
| H                                                        | -0.16236400 | -1.96650900 | -2.65394900 | C | -2.06754000 | 2.82823800  | -1.44706600 |
| H                                                        | 0.59169000  | -3.75139700 | -4.19553300 | C | 0.23447900  | 2.25441700  | -3.03592600 |
| C                                                        | -5.91385300 | -1.47470000 | -1.22193700 | C | 0.70013200  | 2.97184300  | 2.24619700  |
| C                                                        | -5.13927300 | -2.44117700 | -1.86247000 | C | 2.97578000  | 2.24029700  | 0.68828100  |
| C                                                        | -3.79096400 | -2.60159300 | -1.52773500 | C | 2.25137900  | 0.68632700  | 2.97269100  |
| C                                                        | -3.19473400 | -1.79064400 | -0.55070000 | C | 2.81635200  | -1.45801200 | -2.08311900 |
| C                                                        | -3.98459500 | -0.81252900 | 0.07806700  | C | 0.52792800  | -3.16068500 | -2.03198900 |
| C                                                        | -5.33110100 | -0.66090600 | -0.24643000 | C | 2.26057500  | -3.03293900 | 0.23569800  |
| H                                                        | -6.96186400 | -1.35138400 | -1.48265400 | C | -2.46881900 | 1.33252200  | 2.91371000  |
| H                                                        | -5.58177300 | -3.07929600 | -2.62359600 | H | -1.39535700 | 1.47825000  | 2.88356700  |
| H                                                        | -3.20727600 | -3.36646500 | -2.02915500 | C | -1.61383300 | -0.70968600 | -3.64259200 |
| H                                                        | -3.53996300 | -0.15939200 | 0.82380900  | H | -0.69928200 | -1.15327400 | -3.26537400 |
| H                                                        | -5.92109000 | 0.10403100  | 0.25110800  | C | -2.35503100 | -1.39564800 | -4.60506500 |
| C                                                        | -1.66049500 | -3.78736100 | 4.21069500  | H | -1.99989900 | -2.35640300 | -4.96671500 |
| C                                                        | -2.70179100 | -4.00595000 | 3.30564700  | C | -3.99689500 | 0.37182400  | -4.58900400 |
| C                                                        | -2.64810200 | -3.45269700 | 2.02471600  | H | -4.92726900 | 0.80157200  | -4.95232300 |
| C                                                        | -1.54971700 | -2.67248700 | 1.62608900  | C | -3.24567500 | 1.06424000  | -3.63477400 |
| C                                                        | -0.51494700 | -2.45144900 | 2.55004300  | H | -3.60178400 | 2.02365400  | -3.27558600 |
| C                                                        | -0.56669200 | -3.00804300 | 3.82982900  | C | 4.87514800  | -0.72998000 | -3.87000900 |
| H                                                        | -1.70547400 | -4.21645900 | 5.20839300  | H | 5.66952100  | -0.44977900 | -4.55722300 |
| H                                                        | -3.56000500 | -4.60652700 | 3.59672000  | C | 3.64432400  | -3.24164100 | 2.23165300  |
| H                                                        | -3.46828500 | -3.62344600 | 1.33389000  | H | 4.16248700  | -2.76411200 | 3.05836900  |
| H                                                        | 0.32862200  | -1.82883900 | 2.26329900  | C | 2.94717000  | -2.45466400 | 1.31490300  |
| H                                                        | 0.24438700  | -2.82319100 | 4.52950300  | H | 2.92635700  | -1.37977600 | 1.45134200  |
| <b>12<sub>H</sub> [Pd(PH<sub>3</sub>)<sub>4</sub>]</b>   |             |             |             | C | 2.28232600  | -4.43186500 | 0.10855100  |
| Pd                                                       | 0.00014100  | 0.00109200  | -0.00534400 | H | 1.76685200  | -4.91166100 | -0.71628700 |
| P                                                        | 1.17731600  | 2.01675800  | 0.44188500  | C | 2.96812600  | -5.22333600 | 1.03462200  |
| P                                                        | -0.80117800 | -0.91571800 | 2.03355200  | H | 2.96994600  | -6.30431800 | 0.91726700  |
| P                                                        | -1.84788200 | 0.44735100  | -1.42701300 | C | 3.65460500  | -4.63191100 | 2.09653300  |
| P                                                        | 1.47197700  | -1.54991100 | -1.03843300 | H | 4.19080400  | -5.24864500 | 2.81341500  |
| H                                                        | 1.31812900  | 2.53288900  | 1.76132300  | C | 4.08643700  | -2.05110400 | -1.99640200 |
| H                                                        | 2.55428400  | 2.17544800  | 0.11755600  | H | 4.28419400  | -2.80438900 | -1.24152400 |
| H                                                        | 0.79011000  | 3.26604300  | -0.12041000 | C | 5.10750100  | -1.68509500 | -2.87854400 |
| H                                                        | -0.59581300 | -0.27322700 | 3.28737600  | H | 6.08369800  | -2.15616700 | -2.79202000 |
| H                                                        | -2.18484300 | -1.16005400 | 2.26435600  | C | 3.61513700  | -0.13557500 | -3.96944400 |
| H                                                        | -0.38823600 | -2.19559100 | 2.50097000  | H | 3.41900900  | 0.61900900  | -4.72590100 |
| H                                                        | -2.17240400 | 1.76094500  | -1.87027500 | C | 2.60191300  | -0.49210700 | -3.07927000 |
| H                                                        | -1.98195800 | -0.13518000 | -2.71929600 | H | 1.63888900  | -0.00089900 | -3.15327900 |
| H                                                        | -3.17938900 | 0.13544100  | -1.03117000 | C | 1.05605100  | -3.65315800 | -3.23678700 |
| H                                                        | 1.72178900  | -2.83671700 | -0.48287700 | H | 2.01306700  | -3.29350000 | -3.59873200 |
| H                                                        | 1.25952800  | -2.03963200 | -2.35844300 | C | 0.36299100  | -4.61193400 | -3.98135900 |
| H                                                        | 2.84879600  | -1.25781000 | -1.25315500 | H | 0.78973900  | -4.97764100 | -4.91218800 |
| <b>12<sub>Ph</sub> [Pd(PPh<sub>3</sub>)<sub>4</sub>]</b> |             |             |             | C | -0.71023500 | -3.65986200 | -1.59681100 |
| Pd                                                       | 0.00080100  | -0.00365000 | 0.00055100  | H | -1.15157500 | -3.28032500 | -0.68220000 |
| P                                                        | -0.95933800 | 1.39008800  | -1.88769900 | C | -5.09746500 | -3.54447600 | -0.86181100 |
| P                                                        | -1.89513800 | -0.95973800 | 1.38411800  | H | -5.84411400 | -4.12662000 | -1.39607700 |
| P                                                        | 1.46667200  | 1.45798100  | 1.46308000  | C | -3.66235800 | -1.60355600 | -0.71033300 |
| P                                                        | 1.38726500  | -1.89392300 | -0.96127800 | H | -3.28906400 | -0.68659600 | -1.15064900 |
| C                                                        | -2.04133400 | 0.53193900  | -3.14585600 | C | -2.83597900 | 5.12981000  | -1.66307500 |
| C                                                        | -3.15879700 | -2.03645400 | 0.52646100  | H | -2.73696300 | 6.10760900  | -2.12832600 |
| C                                                        | -3.04088700 | 0.23851100  | 2.24584600  | C | -1.96430200 | 4.10105600  | -2.03211300 |
| C                                                        | -5.23409800 | 1.02434100  | 2.95666400  | H | -1.20524300 | 4.29591000  | -2.78195200 |
|                                                          |             |             |             | C | -3.06848500 | 2.61939300  | -0.48491900 |
|                                                          |             |             |             | H | -3.15444800 | 1.65428200  | 0.00091700  |

|   |             |             |             |   |             |             |             |
|---|-------------|-------------|-------------|---|-------------|-------------|-------------|
| C | -0.69661300 | 4.94963900  | 1.95962600  | C | -4.62682800 | -2.34244000 | -1.39568400 |
| H | -1.32558400 | 5.55930800  | 1.31714200  | H | -4.99376000 | -1.98269000 | -2.35280500 |
| C | -0.11566500 | 3.78947200  | 1.44711300  | C | -3.26050400 | 2.25149900  | 3.60332800  |
| H | -0.31103200 | 3.51299400  | 0.41739200  | H | -2.78815800 | 3.09060300  | 4.10604100  |
| C | -0.48614000 | 5.30840600  | 3.29316000  | C | -4.64902900 | 2.10180400  | 3.62463800  |
| H | -0.94312300 | 6.20800800  | 3.69772000  | H | -5.26988400 | 2.81962500  | 4.15479100  |
| C | 0.31473000  | 4.50135600  | 4.10280500  | C | -3.64343300 | -3.24436800 | 1.05449900  |
| H | 0.48821800  | 4.77116300  | 5.14176100  | H | -3.27953700 | -3.60495100 | 2.01046000  |
| C | 0.90823200  | 3.34703600  | 3.58335500  | C | -4.59966700 | -3.99374800 | 0.36260200  |
| H | 1.53864600  | 2.74195500  | 4.22601400  | H | -4.95956600 | -4.92686400 | 0.78933700  |
| C | 3.28692500  | -0.50449400 | 5.31199700  | C | 1.33864700  | 2.90883800  | -2.46722000 |
| H | 3.68730300  | -0.96330500 | 6.21253500  | H | 1.49473200  | 2.86411200  | -1.39573800 |
| C | 1.95050000  | -0.69968600 | 4.95609100  | C | 2.25294400  | 3.60332600  | -3.26010300 |
| H | 1.30117100  | -1.31880200 | 5.56864400  | H | 3.09930200  | 4.09642100  | -2.79051500 |
| C | 1.44407700  | -0.11628200 | 3.79444800  |   |             |             |             |
| H | 0.41190900  | -0.29988300 | 3.51898500  |   |             |             |             |
| C | 3.59257500  | 0.87798700  | 3.34389600  |   |             |             |             |
| H | 4.24361900  | 1.49589100  | 2.73538600  |   |             |             |             |
| C | 4.10583200  | 0.28229500  | 4.49989200  |   |             |             |             |
| H | 5.14749100  | 0.44302500  | 4.76715300  |   |             |             |             |
| C | 5.30942800  | 3.27460900  | -0.51434700 |   |             |             |             |
| H | 6.20786200  | 3.67458600  | -0.97761200 |   |             |             |             |
| C | 4.95025800  | 1.93924300  | -0.71042100 |   |             |             |             |
| H | 5.55784500  | 1.29018300  | -1.33463700 |   |             |             |             |
| C | -0.73323600 | -3.84038000 | 4.89502600  |   |             |             |             |
| H | -0.45329700 | -4.52187500 | 5.69441200  |   |             |             |             |
| C | -1.69620900 | -2.85434700 | 5.11688500  |   |             |             |             |
| H | -2.17343600 | -2.76603000 | 6.08992200  |   |             |             |             |
| C | -2.06220100 | -1.98014300 | 4.08939100  |   |             |             |             |
| H | -2.82195200 | -1.23016100 | 4.28009100  |   |             |             |             |
| C | -0.13068100 | -3.94234200 | 3.63900900  |   |             |             |             |
| H | 0.62974100  | -4.69509000 | 3.45127000  |   |             |             |             |
| C | -0.48676900 | -3.05928900 | 2.61923300  |   |             |             |             |
| H | 0.00951800  | -3.13299500 | 1.65889900  |   |             |             |             |
| C | -0.86304600 | -5.10487300 | -3.53059200 |   |             |             |             |
| H | -1.39838700 | -5.85333200 | -4.10940400 |   |             |             |             |
| C | -1.39681200 | -4.62697600 | -2.33147200 |   |             |             |             |
| H | -2.35512800 | -4.98963500 | -1.97068800 |   |             |             |             |
| C | -1.46028300 | -2.06868900 | 2.82316600  |   |             |             |             |
| C | 4.50351800  | 4.09284700  | 0.27971800  |   |             |             |             |
| H | 4.77345600  | 5.13368700  | 0.44140700  |   |             |             |             |
| C | 3.35050500  | 3.57994400  | 0.88132900  |   |             |             |             |
| H | 2.74637800  | 4.22949500  | 1.50511800  |   |             |             |             |
| C | 3.79123200  | 1.43356600  | -0.12114900 |   |             |             |             |
| H | 3.51244100  | 0.40242300  | -0.30585200 |   |             |             |             |
| C | 2.08879900  | 3.64235400  | -4.64663400 |   |             |             |             |
| H | 2.80294300  | 4.17636300  | -5.26845300 |   |             |             |             |
| C | 1.00172800  | 2.98764900  | -5.22854600 |   |             |             |             |
| H | 0.86297100  | 3.01192600  | -6.30670900 |   |             |             |             |
| C | 0.07861600  | 2.30503100  | -4.43121700 |   |             |             |             |
| H | -0.76591900 | 1.81460700  | -4.90322700 |   |             |             |             |
| C | -3.55334200 | -0.85746200 | -5.08036600 |   |             |             |             |
| H | -4.13728700 | -1.39218100 | -5.82528800 |   |             |             |             |
| C | -3.94844900 | 3.64050800  | -0.12575600 |   |             |             |             |
| H | -4.70992000 | 3.44866000  | 0.62491300  |   |             |             |             |
| C | -3.83325200 | 4.90296800  | -0.71288500 |   |             |             |             |
| H | -4.51284300 | 5.70311100  | -0.43055200 |   |             |             |             |

SI only:

Table SI2c – Jaguar optimization of PCy<sub>3</sub> ligand in different coordination environments.

PCy<sub>3</sub>

Conformer A

|     |               |               |               |
|-----|---------------|---------------|---------------|
| P1  | -3.2574170903 | 2.2783635060  | 10.1373892104 |
| C4  | -0.0063605452 | 1.3181065668  | 7.5834871162  |
| C5  | -0.9326974843 | 2.0838555331  | 8.5444367810  |
| C6  | -2.2271303780 | 1.2960482872  | 8.8605609559  |
| C7  | -2.9472615855 | 0.9788880307  | 7.5321259506  |
| C8  | -2.0346584024 | 0.1986987210  | 6.5666470368  |
| C9  | -0.7283213265 | 0.9521363026  | 6.2788697023  |
| H10 | 0.3466231795  | 0.3986933432  | 8.0746248076  |
| H11 | 0.8874918433  | 1.9188111233  | 7.3699485749  |
| H12 | -0.3887252061 | 2.3316249509  | 9.4611738151  |
| H13 | -1.2155763422 | 3.0446186778  | 8.0903893842  |
| H14 | -1.9536470211 | 0.3313619822  | 9.3154462097  |
| H15 | -3.8590071896 | 0.3977249834  | 7.7071365542  |
| H16 | -3.2553181600 | 1.9171913415  | 7.0483337093  |
| H17 | -1.7998830419 | -0.7816071247 | 7.0077977626  |
| H18 | -2.5735104089 | -0.0024875354 | 5.6313157122  |
| H19 | -0.9581281536 | 1.8734432136  | 5.7231812347  |
| H20 | -0.0751261943 | 0.3519498095  | 5.6322454026  |
| C21 | -2.6272911726 | 1.9529328357  | 14.3230425898 |
| C22 | -3.0385914233 | 2.5025282929  | 12.9457938800 |
| C23 | -2.6129411095 | 1.5640465624  | 11.7905765557 |
| C24 | -1.0855020002 | 1.3505773550  | 11.8684350646 |
| C25 | -0.6621163887 | 0.7863486651  | 13.2381367058 |
| C26 | -1.1167731852 | 1.6881859183  | 14.3943268219 |
| H27 | -3.1708528462 | 1.0159978746  | 14.5174952700 |
| H28 | -2.9291533218 | 2.6561443558  | 15.1103225879 |
| H29 | -2.5639954002 | 3.4817454976  | 12.7872962618 |
| H30 | -4.1177018086 | 2.6837042429  | 12.9288701356 |
| H31 | -3.0837291169 | 0.5800648214  | 11.9411418205 |
| H32 | -0.7418393340 | 0.6697997218  | 11.0824097250 |
| H33 | -0.5722770702 | 2.3095339960  | 11.7060593752 |
| H34 | -1.0992466166 | -0.2154965278 | 13.3643781991 |
| H35 | 0.4277999772  | 0.6550928626  | 13.2622210531 |
| H36 | -0.5795235094 | 2.6465879099  | 14.3371025278 |
| H37 | -0.8497646427 | 1.2373639616  | 15.3589372352 |
| C38 | -7.1743345810 | 1.5144850934  | 8.6920326316  |
| C39 | -5.8085037655 | 2.1824271484  | 8.9287837481  |
| C40 | -4.9652706860 | 1.4318306771  | 9.9879421549  |
| C41 | -5.7781701590 | 1.3502451459  | 11.2983382320 |
| C42 | -7.1426233056 | 0.6700648434  | 11.0763413045 |
| C43 | -7.9701757323 | 1.3842185517  | 9.9983895041  |
| H44 | -7.0197212318 | 0.5148997312  | 8.2584400427  |
| H45 | -7.7465259812 | 2.0889377101  | 7.9517345007  |
| H46 | -5.9624800814 | 3.2136134305  | 9.2784004730  |
| H47 | -5.2686358830 | 2.2624493184  | 7.9801975110  |
| H48 | -4.8030360696 | 0.3980970720  | 9.6449256085  |
| H49 | -5.2285844988 | 0.7998713277  | 12.0694258991 |
| H50 | -5.9465907237 | 2.3641589877  | 11.6895231465 |
| H51 | -6.9778999361 | -0.3754246107 | 10.7754929526 |
| H52 | -7.6966689799 | 0.6371073002  | 12.0237745085 |
| H53 | -8.2409987604 | 2.3882436006  | 10.3575990017 |

H54 -8.9130643364 0.8500017961 9.8235681144

Conformer B

|     |               |               |               |
|-----|---------------|---------------|---------------|
| P1  | -3.0325148996 | 2.2068339318  | 10.3318354146 |
| C4  | -1.4085398983 | 2.2424180899  | 6.4414797387  |
| C5  | -2.2381407344 | 2.6124831118  | 7.6832002670  |
| C6  | -2.1376862307 | 1.5423070624  | 8.7966448288  |
| C7  | -2.5232456477 | 0.1584184417  | 8.2300088362  |
| C8  | -1.6823967890 | -0.2112554211 | 6.9918768122  |
| C9  | -1.7864723623 | 0.8578011453  | 5.8952254082  |
| H10 | -0.3410340075 | 2.2465835902  | 6.7087185729  |
| H11 | -1.5376671768 | 3.0086614431  | 5.6659184155  |
| H12 | -1.9214159992 | 3.5861108041  | 8.0746129728  |
| H13 | -3.2933735537 | 2.7277155226  | 7.3900724727  |
| H14 | -1.0825465698 | 1.5000653732  | 9.1121415508  |
| H15 | -2.4127707994 | -0.6191819919 | 8.9919113990  |
| H16 | -3.5839254033 | 0.1691549972  | 7.9414704545  |
| H17 | -0.6293800872 | -0.3219914900 | 7.2913961798  |
| H18 | -1.9997637793 | -1.1888604140 | 6.6049791680  |
| H19 | -2.8191271470 | 0.8868672924  | 5.5160415912  |
| H20 | -1.1480765919 | 0.5946901246  | 5.0419119458  |
| C21 | -0.5389300319 | 1.6012487657  | 13.6785017800 |
| C22 | -1.1197583982 | 2.1723084593  | 12.3732137525 |
| C23 | -2.2651915364 | 1.2976445855  | 11.8102656647 |
| C24 | -1.7772324174 | -0.1578902705 | 11.6402458786 |
| C25 | -1.2047873301 | -0.7293020816 | 12.9525904529 |
| C26 | -0.0738814177 | 0.1477325244  | 13.5076016108 |
| H27 | -1.3092117527 | 1.6444768554  | 14.4632239231 |
| H28 | 0.2915741616  | 2.2310390996  | 14.0234060237 |
| H29 | -0.3177855239 | 2.2420483911  | 11.6217990928 |
| H30 | -1.4787925683 | 3.1954316791  | 12.5336468884 |
| H31 | -3.0728459811 | 1.3012844111  | 12.5603037303 |
| H32 | -2.5873111043 | -0.8017210420 | 11.2847488662 |
| H33 | -0.9902898298 | -0.1882289824 | 10.8732129241 |
| H34 | -2.0110858949 | -0.7960987095 | 13.6983879909 |
| H35 | -0.8480331014 | -1.7548911834 | 12.7881296542 |
| H36 | 0.7789796290  | 0.1191541771  | 12.8127791377 |
| H37 | 0.2884902928  | -0.2538485357 | 14.4627821163 |
| C38 | -7.2246356249 | 2.1963801108  | 10.7829558607 |
| C39 | -5.7360312083 | 2.5373921848  | 10.9688161748 |
| C40 | -4.8120739967 | 1.5602948772  | 10.2033583552 |
| C41 | -5.1296450674 | 0.1065983155  | 10.6175009043 |
| C42 | -6.6197093531 | -0.2338365861 | 10.4192007872 |
| C43 | -7.5298915082 | 0.7436175733  | 11.1753866890 |
| H44 | -7.4994253801 | 2.3512736746  | 9.7287029440  |
| H45 | -7.8415236902 | 2.8894007242  | 11.3699079105 |
| H46 | -5.4886808665 | 2.5001634826  | 12.0412186586 |
| H47 | -5.5394202231 | 3.5658419209  | 10.6446892345 |
| H48 | -5.0469837579 | 1.6678210034  | 9.1319362323  |
| H49 | -4.5154724212 | -0.6026732584 | 10.0546936334 |
| H50 | -4.8777929187 | -0.0301928548 | 11.6787208854 |
| H51 | -6.8583489575 | -0.1954677232 | 9.3457194477  |
| H52 | -6.8125715255 | -1.2651861652 | 10.7436784744 |
| H53 | -7.3720062011 | 0.6197027407  | 12.2573839168 |
| H54 | -8.5852492209 | 0.5088893937  | 10.9856848212 |

Conformer C

P1 -3.3746198672 2.0579945812 10.0496616395  
C4 -0.0817779886 0.7650186797 7.6966123898  
C5 -0.8851841177 1.3872011849 8.8535865750  
C6 -2.4061434234 1.1701829065 8.6862115429  
C7 -2.8570830803 1.7024185989 7.3055154374  
C8 -2.0603442082 1.0710625778 6.1504782184  
C9 -0.5504772087 1.2839153480 6.3297689492  
H10 -0.1963332934 -0.3289234283 7.7267039726  
H11 0.9878164541 0.9694169682 7.8368786572  
H12 -0.5360265741 0.9610435077 9.8013155573  
H13 -0.6775282391 2.4668320614 8.9007667918  
H14 -2.6012585664 0.0889057842 8.7204372177  
H15 -3.9283769310 1.5242919407 7.1535211665  
H16 -2.7213971709 2.7935918812 7.2856332590  
H17 -2.2732352372 -0.0076509010 6.1079837655  
H18 -2.3948968336 1.4924989979 5.1934761913  
H19 -0.3253983862 2.3581406585 6.2530590296  
H20 0.0054336937 0.7893643779 5.5227273367  
C21 -1.9253432409 -0.5985543234 13.1381734394  
C22 -2.6436776736 -0.1895221993 11.8379494408  
C23 -2.6353828243 1.3398939685 11.6414917415  
C24 -3.2496419534 2.0431886527 12.8736831887  
C25 -2.5410672779 1.6313729639 14.1768909753  
C26 -2.5314590503 0.1060884188 14.3613461189  
H27 -0.8593896418 -0.3373225371 13.0594449825  
H28 -1.9702453884 -1.6884016810 13.2648082001  
H29 -3.6823532191 -0.5453319552 11.8838055241  
H30 -2.1768371182 -0.6934249011 10.9824047953  
H31 -1.5846056972 1.6644356923 11.5923774595  
H32 -3.2032021650 3.1317867022 12.7459396282  
H33 -4.3161120565 1.7842369582 12.9538878995  
H34 -1.5047549304 2.0000705054 14.1538580817  
H35 -3.0247519421 2.1159805194 15.0351366956  
H36 -3.5635714978 -0.2473028542 14.5061822664  
H37 -1.9791568234 -0.1646349966 15.2704990574  
C38 -6.7154035642 -0.6397556763 9.4681208693  
C39 -5.2653393034 -0.1291984261 9.3635507909  
C40 -5.1110596934 1.2727074545 9.9919192931  
C41 -6.1147364789 2.2593428686 9.3486194930  
C42 -7.5629680319 1.7477435128 9.4405410954  
C43 -7.7095106095 0.3442705824 8.8335283775  
H44 -6.9728424925 -0.7825400416 10.5284496698  
H45 -6.7985282919 -1.6260623067 8.9924672080  
H46 -4.9844818552 -0.0912039258 8.3021869958  
H47 -4.5867663210 -0.8463796036 9.8379230464  
H48 -5.3891017960 1.1875666081 11.0542232992  
H49 -6.0292233066 3.2422336136 9.8271950814  
H50 -5.8515691679 2.4113310425 8.2912408853  
H51 -7.8667769437 1.7172516218 10.4979156141  
H52 -8.2420948906 2.4521340404 8.9424825337  
H53 -7.5232916751 0.3968458792 7.7502273843  
H54 -8.7378276600 -0.0199470020 8.9556527518

#### Conformer D

P1 -3.3068046427 2.1710874949 10.0913229291  
C4 -0.1755493830 0.4331696354 7.6948829705  
C5 -0.8834835259 1.0234209883 8.9296952292

C6 -2.3662417345 1.3464597840 8.6448522098  
C7 -2.4528367536 2.2813031062 7.4126728190  
C8 -1.7604385286 1.6859325919 6.1752100120  
C9 -0.2920485655 1.3478320991 6.4677579364  
H10 -0.6228596469 -0.5445045112 7.4606987813  
H11 0.8797136924 0.2428138782 7.9312816292  
H12 -0.7912951700 0.3146383294 9.7596357210  
H13 -0.3608858573 1.9415369473 9.2389979820  
H14 -2.8699384764 0.3983868485 8.3998024915  
H15 -3.4960792065 2.5193209334 7.1775610716  
H16 -1.9764994361 3.2383721807 7.6702634462  
H17 -2.2899252279 0.7727871330 5.8637318334  
H18 -1.8309200722 2.3884194305 5.3343812949  
H19 0.2623548059 2.2794316755 6.6557637642  
H20 0.1766718636 0.8757656362 5.5945858426  
C21 -1.8506310159 -0.5113654631 13.1486417792  
C22 -2.6970707059 -0.0466367533 11.9482180062  
C23 -2.4636568708 1.4447939183 11.6329528761  
C24 -2.7222158534 2.3179048967 12.8841390276  
C25 -1.8749642200 1.8482234793 14.0803949362  
C26 -2.1040344062 0.3601754515 14.3885324194  
H27 -0.7845071200 -0.4593155410 12.8811253566  
H28 -2.0641356238 -1.5650017773 13.3725671827  
H29 -3.7579034232 -0.2134773932 12.1806055502  
H30 -2.4717819688 -0.6669082243 11.0710275001  
H31 -1.3955573465 1.5692316972 11.4045505323  
H32 -2.5051981269 3.3682410748 12.6546272595  
H33 -3.7833899844 2.2773375614 13.1637204261  
H34 -0.8103777517 2.0107353949 13.8538752146  
H35 -2.1017564005 2.4596560538 14.9636736547  
H36 -3.1419454796 0.2162632670 14.7248620062  
H37 -1.4607082741 0.0385486588 15.2177722226  
C38 -7.0406578980 0.7806526581 8.5749447318  
C39 -5.6631198999 1.4651475578 8.6428194165  
C40 -4.9621826932 1.2389643670 10.0016062157  
C41 -5.8992750371 1.6768141365 11.1499720998  
C42 -7.2769289796 0.9936355812 11.0788444185  
C43 -7.9558868572 1.2270898053 9.7227524630  
H44 -6.9047222459 -0.3101809585 8.6238231458  
H45 -7.5100647381 0.9924096586 7.6052602024  
H46 -5.7880606681 2.5454717087 8.4759598961  
H47 -5.0403778586 1.0908201943 7.8228660315  
H48 -4.7687126282 0.1603022531 10.1012342243  
H49 -5.4427152742 1.4611242283 12.1217261692  
H50 -6.0318773395 2.7678291258 11.1053661906  
H51 -7.1542382192 -0.0878423474 11.2408162632  
H52 -7.9136325086 1.3599085599 11.8948631675  
H53 -8.1839812111 2.2975438063 9.6103065895  
H54 -8.9153922163 0.6958478562 9.6769271707

#### Conformer E

P1 -3.2428978097 2.0218127661 10.0039265920  
C4 -0.0160019013 1.1267896809 7.3985588197  
C5 -0.8097106448 1.6658813417 8.6022159382  
C6 -2.2957444589 1.2382030338 8.5628447428  
C7 -2.9146566021 1.6785995537 7.2154474282  
C8 -2.1268108893 1.1381963866 6.0084285207

C9 -0.6493259360 1.5504888275 6.0661380578  
H10 0.0190309416 0.0282629652 7.4508082134  
H11 1.0239139080 1.4743535758 7.4557116285  
H12 -0.3330543036 1.3276735992 9.5285000053  
H13 -0.7553777160 2.7645419601 8.6094680012  
H14 -2.3436754547 0.1412675363 8.6250196002  
H15 -3.9574470199 1.3516475450 7.1419426473  
H16 -2.9313341575 2.7777373350 7.1747299147  
H17 -2.1969459490 0.0402484876 5.9921589333  
H18 -2.5868988722 1.4932806897 5.0769344179  
H19 -0.5740651909 2.6430369952 5.9606340078  
H20 -0.0964020404 1.1158149847 5.2233555428  
C21 -1.0087250456 1.6457185402 13.5946707514  
C22 -1.4641038912 2.1569612113 12.2165808735  
C23 -2.5188147737 1.2233288830 11.5755414799  
C24 -1.9890546321 -0.2250253814 11.5073018755  
C25 -1.5302670452 -0.7300665118 12.8891501862  
C26 -0.4857744826 0.2033768132 13.5187992023  
H27 -1.8584488439 1.6855688459 14.2929109590  
H28 -0.2377955966 2.3111336670 14.0049656663  
H29 -0.5880838882 2.2361543045 11.5575485182  
H30 -1.8730667720 3.1706604678 12.3040737211  
H31 -3.3851271219 1.2220308732 12.2568244792  
H32 -2.7553737493 -0.8995963568 11.1102755268  
H33 -1.1395579657 -0.2777775148 10.8128559214  
H34 -2.4031925110 -0.7974821899 13.5556638232  
H35 -1.1284572686 -1.7481239074 12.7991626063  
H36 0.4317830516 0.1822251506 12.9115858435  
H37 -0.2067467491 -0.1560533980 14.5177498925  
C38 -6.5805871794 -0.7165816203 9.5583874623  
C39 -5.1300725989 -0.2140746875 9.4258493483  
C40 -4.9743406894 1.2257887044 9.9600733729  
C41 -5.9817496894 2.1725075257 9.2641211683  
C42 -7.4282845651 1.6650873727 9.3949640042  
C43 -7.5742636813 0.2295114878 8.8689225936  
H44 -6.8380978783 -0.7974217917 10.6251320112  
H45 -6.6638852705 -1.7288135226 9.1407471891  
H46 -4.8398619839 -0.2507844451 8.3669993134  
H47 -4.4577496250 -0.8988008579 9.9542239997  
H48 -5.2510309516 1.2081931836 11.0266628195  
H49 -5.8940124684 3.1807442267 9.6861957504  
H50 -5.7296245348 2.2639493005 8.1980512384  
H51 -7.7260682750 1.6939536846 10.4540214942  
H52 -8.1114988920 2.3388626182 8.8613840578  
H53 -7.3884543883 0.2207534625 7.7842533249  
H54 -8.6023450590 -0.1278311433 9.0113858422

#### Conformer F

P1 -3.3729228310 2.1626085597 10.2146282600  
C4 -0.1987679424 0.8436849475 7.7295598944  
C5 -0.9659721929 1.5384585475 8.8682796276  
C6 -2.4774947685 1.2125302130 8.8390682512  
C7 -3.0577925887 1.5641357290 7.4498456282  
C8 -2.2915179030 0.8697564494 6.3096281400  
C9 -0.7909205881 1.1889410263 6.3563467696  
H10 -0.2380379655 -0.2458642436 7.8784666358  
H11 0.8616850277 1.1251005144 7.7707599679

H12 -0.5256461199 1.2485632121 9.8294386847  
H13 -0.8348794100 2.6274265327 8.7825381053  
H14 -2.5965816070 0.1295601867 8.9907651650  
H15 -4.1162326250 1.2852603910 7.3899658223  
H16 -3.0135249125 2.6540604316 7.3068310030  
H17 -2.4331611910 -0.2184944518 6.3896018749  
H18 -2.7160181841 1.1682084411 5.3420719395  
H19 -0.6423364503 2.2608054088 6.1573701598  
H20 -0.2597429551 0.6473603311 5.5629096194  
C21 -1.4261820640 -0.3705961774 13.1440148336  
C22 -2.2901068302 -0.0580109066 11.9066926481  
C23 -2.5418141751 1.4594908058 11.7741890630  
C24 -3.1957269663 2.0041109630 13.0640425812  
C25 -2.3374727530 1.6938978591 14.3035902139  
C26 -2.0528257871 0.1892672074 14.4303399302  
H27 -0.4267256850 0.0688980153 13.0063020922  
H28 -1.2790803707 -1.4551299620 13.2329009058  
H29 -3.2459934526 -0.5883219963 11.9974532158  
H30 -1.7990460669 -0.4538046323 11.0102539528  
H31 -1.5522752931 1.9412274420 11.7112839279  
H32 -3.3611075156 3.0856498224 12.9796905242  
H33 -4.1846659271 1.5437559360 13.1965752265  
H34 -1.3851523027 2.2395222875 14.2272122715  
H35 -2.8373003828 2.0643678597 15.2082508504  
H36 -2.9961863217 -0.3404592272 14.6316455327  
H37 -1.3976785140 -0.0043410800 15.2895997401  
C38 -7.5871148485 1.9309895374 10.6297479088  
C39 -6.1264734510 2.2881194267 10.9583268370  
C40 -5.1398693752 1.4811649332 10.0825755869  
C41 -5.3992188887 -0.0305276616 10.2415389491  
C42 -6.8585032138 -0.3875020043 9.9012753028  
C43 -7.8470976490 0.4216786204 10.7548008849  
H44 -7.8130940786 2.2532530849 9.6021541014  
H45 -8.2664466729 2.4895757655 11.2869533389  
H46 -5.9400385817 2.0787364018 12.0203358763  
H47 -5.9594272502 3.3632286385 10.8187227964  
H48 -5.3854941888 1.7423488906 9.0408494359  
H49 -4.7164098517 -0.6127994469 9.6107140119  
H50 -5.1991470552 -0.3282375905 11.2794514451  
H51 -7.0427929335 -0.1811700165 8.8362126328  
H52 -7.0241754802 -1.4637131751 10.0431568515  
H53 -7.7408115854 0.1229031702 11.8086277653  
H54 -8.8803659855 0.1874965350 10.4675602055

#### Conformer G

P1 -3.0368929221 2.2868326457 10.1490392312  
C4 -1.0179959205 2.3951463001 6.4356824706  
C5 -1.9661309939 2.7742445153 7.5867002156  
C6 -2.0919163001 1.6380101858 8.6318932610  
C7 -2.5260555262 0.3293419931 7.9370139905  
C8 -1.5676592338 -0.0507617831 6.7913373638  
C9 -1.4378063270 1.0806508252 5.7612377417  
H10 0.0029892510 2.2876194179 6.8321963982  
H11 -0.9809082487 3.2081116085 5.6986564063  
H12 -1.6192884480 3.6922481785 8.0752267936  
H13 -2.9603520768 3.0017688116 7.1749239758  
H14 -1.0802928666 1.4754728937 9.0398215498



|     |               |               |               |
|-----|---------------|---------------|---------------|
| H15 | -2.5843006529 | -0.4938591088 | 8.6554671611  |
| H16 | -3.5348232727 | 0.4564878319  | 7.5212896862  |
| H17 | -0.5754832513 | -0.2758132199 | 7.2108298850  |
| H18 | -1.9155226343 | -0.9720487263 | 6.3053182415  |
| H19 | -2.4063429806 | 1.2242726726  | 5.2589172718  |
| H20 | -0.7187657157 | 0.8049823875  | 4.9789398704  |
| C21 | -0.7516248767 | 1.3430315684  | 13.5758724710 |
| C22 | -1.2373260285 | 2.0286779697  | 12.2871291946 |
| C23 | -2.3877851039 | 1.2497617114  | 11.6041048183 |
| C24 | -1.9548198467 | -0.2117581555 | 11.3574108887 |
| C25 | -1.4808522441 | -0.8973126974 | 12.6537384135 |
| C26 | -0.3427459300 | -0.1157730139 | 13.3251739717 |
| H27 | -1.5600986078 | 1.3684141044  | 14.3220788576 |
| H28 | 0.0862910912  | 1.9069757212  | 14.0063396894 |
| H29 | -0.3935923253 | 2.1132235872  | 11.5844181422 |
| H30 | -1.5592842247 | 3.0542648443  | 12.5019222110 |
| H31 | -3.2356409046 | 1.2370347591  | 12.3083095328 |
| H32 | -2.7710180133 | -0.7918852408 | 10.9148592269 |
| H33 | -1.1293799050 | -0.2282934025 | 10.6316351805 |
| H34 | -2.3283424214 | -0.9756327957 | 13.3512939989 |
| H35 | -1.1621573088 | -1.9252645257 | 12.4352427192 |
| H36 | 0.5437787916  | -0.1373102735 | 12.6735407022 |
| H37 | -0.0499913113 | -0.5990363236 | 14.2663001997 |
| C38 | -6.8254781065 | 0.1618542627  | 10.1725629708 |
| C39 | -5.2909677761 | 0.3008978300  | 10.1250658253 |
| C40 | -4.8633174255 | 1.7821479419  | 10.0402523145 |
| C41 | -5.5455903295 | 2.4805240458  | 8.8413452742  |
| C42 | -7.0765035709 | 2.3309768806  | 8.8882211753  |
| C43 | -7.4977391127 | 0.8565108861  | 8.9790626084  |
| H44 | -7.1991592393 | 0.6071481307  | 11.1069060317 |
| H45 | -7.1023333071 | -0.9003580870 | 10.2021151095 |
| H46 | -4.9091231543 | -0.2518336850 | 9.2582984433  |
| H47 | -4.8594024024 | -0.1703314950 | 11.0154096857 |
| H48 | -5.2548750079 | 2.2723910796  | 10.9480246028 |
| H49 | -5.2716581115 | 3.5428405627  | 8.8206112599  |
| H50 | -5.1757011694 | 2.0437643617  | 7.9027805074  |
| H51 | -7.4641398289 | 2.8734495130  | 9.7633773597  |
| H52 | -7.5256397248 | 2.8033705994  | 8.0047330100  |
| H53 | -7.2107604546 | 0.3398433664  | 8.0507355506  |
| H54 | -8.5897486585 | 0.7754379407  | 9.0559921549  |

#### [AuCl(PCy<sub>3</sub>)]

##### Conformer A

|     |               |              |               |
|-----|---------------|--------------|---------------|
| P1  | -3.2621072308 | 2.1897166790 | 10.1526791723 |
| Au2 | -3.2311957131 | 4.4841969398 | 9.9508515126  |
| Cl3 | -3.1915173916 | 6.8105502914 | 9.7564759190  |
| C4  | -0.0032194628 | 1.3305294968 | 7.5769670004  |
| C5  | -0.9177271937 | 2.0969397889 | 8.5491270404  |
| C6  | -2.2176834392 | 1.3099582668 | 8.8452404656  |
| C7  | -2.9496758268 | 1.0197656547 | 7.5155056296  |
| C8  | -2.0410464459 | 0.2464761363 | 6.5404629529  |
| C9  | -0.7285331459 | 0.9941388903 | 6.2667846952  |
| H10 | 0.3416256866  | 0.4011022592 | 8.0552416576  |
| H11 | 0.8943370262  | 1.9280401661 | 7.3741612095  |
| H12 | -0.3740646660 | 2.3251937126 | 9.4697731464  |
| H13 | -1.1928076780 | 3.0650183126 | 8.1089094924  |
| H14 | -1.9529417013 | 0.3388774339 | 9.2924624289  |

|     |               |               |               |
|-----|---------------|---------------|---------------|
| H15 | -3.8633933244 | 0.4410389157  | 7.6860190967  |
| H16 | -3.2497599954 | 1.9693832529  | 7.0511509082  |
| H17 | -1.8179194339 | -0.7442411591 | 6.9645978937  |
| H18 | -2.5826808687 | 0.0682979523  | 5.6027595402  |
| H19 | -0.9487601633 | 1.9260486576  | 5.7259709607  |
| H20 | -0.0805534382 | 0.3972265664  | 5.6126642091  |
| C21 | -2.6098771303 | 1.9725289839  | 14.3358971869 |
| C22 | -3.0387542946 | 2.5203791068  | 12.9627202694 |
| C23 | -2.6040285876 | 1.5763304042  | 11.8143921298 |
| C24 | -1.0741542547 | 1.3708441004  | 11.8727840621 |
| C25 | -0.6418194066 | 0.8168130424  | 13.2432495501 |
| C26 | -1.0962820691 | 1.7230473656  | 14.3958930660 |
| H27 | -3.1453514769 | 1.0321891408  | 14.5375401166 |
| H28 | -2.9131011045 | 2.6779015804  | 15.1195726460 |
| H29 | -2.5746961728 | 3.5020379978  | 12.7971223641 |
| H30 | -4.1192076793 | 2.6898604656  | 12.9497723818 |
| H31 | -3.0732196114 | 0.5914710650  | 11.9642739231 |
| H32 | -0.7380729140 | 0.6853699997  | 11.0873366824 |
| H33 | -0.5711699702 | 2.3322820285  | 11.7002226151 |
| H34 | -1.0699418386 | -0.1883384456 | 13.3762752018 |
| H35 | 0.4487378084  | 0.6948009022  | 13.2578293679 |
| H36 | -0.5684830394 | 2.6855978013  | 14.3305900645 |
| H37 | -0.8187726397 | 1.2773131818  | 15.3593618309 |
| C38 | -7.1745656354 | 1.5127138450  | 8.6761050196  |
| C39 | -5.8129978062 | 2.1893478532  | 8.9111152040  |
| C40 | -4.9910661439 | 1.4454615677  | 9.9922396344  |
| C41 | -5.8068113744 | 1.4001691393  | 11.3041775637 |
| C42 | -7.1702422998 | 0.7169817316  | 11.0789463674 |
| C43 | -7.9847533121 | 1.4076382379  | 9.9755466829  |
| H44 | -7.0140149018 | 0.5064744930  | 8.2599843680  |
| H45 | -7.7364342367 | 2.0759831293  | 7.9205931791  |
| H46 | -5.9687610346 | 3.2225517993  | 9.2499462737  |
| H47 | -5.2632749173 | 2.2585100561  | 7.9686037301  |
| H48 | -4.8283581011 | 0.4059768024  | 9.6674209445  |
| H49 | -5.2636826971 | 0.8627503708  | 12.0900217793 |
| H50 | -5.9705492769 | 2.4245782032  | 11.6673266397 |
| H51 | -7.0033113730 | -0.3362629066 | 10.8072637565 |
| H52 | -7.7321079781 | 0.7109469968  | 12.0214694684 |
| H53 | -8.2627980500 | 2.4178079798  | 10.3096079015 |
| H54 | -8.9227952415 | 0.8664055464  | 9.7983942424  |

##### Conformer B

|     |               |               |               |
|-----|---------------|---------------|---------------|
| P1  | -3.0377119766 | 2.1701536429  | 10.3190273242 |
| Au2 | -2.9216485065 | 4.4775747245  | 10.5050518955 |
| Cl3 | -2.8096711332 | 6.7998252192  | 10.6973781834 |
| C4  | -1.4262487217 | 2.2317873608  | 6.4012939645  |
| C5  | -2.2732499475 | 2.6211703390  | 7.6257460473  |
| C6  | -2.1338213116 | 1.5851065063  | 8.7688774228  |
| C7  | -2.4958496959 | 0.1755241515  | 8.2462261322  |
| C8  | -1.6321502931 | -0.2086300171 | 7.0291846866  |
| C9  | -1.7577597377 | 0.8200732383  | 5.8971344770  |
| H10 | -0.3613842560 | 2.2806951523  | 6.6730184474  |
| H11 | -1.5777283322 | 2.9707035397  | 5.6049254204  |
| H12 | -1.9815763391 | 3.6156506128  | 7.9794485812  |
| H13 | -3.3303286831 | 2.6944362342  | 7.3295846531  |
| H14 | -1.0788870466 | 1.5788295836  | 9.0842984875  |
| H15 | -2.3783203606 | -0.5801470220 | 9.0281256097  |

|     |               |               |               |
|-----|---------------|---------------|---------------|
| H16 | -3.5526233576 | 0.1632821221  | 7.9453458608  |
| H17 | -0.5800639283 | -0.2817715023 | 7.3422288712  |
| H18 | -1.9226484025 | -1.2067465883 | 6.6771843948  |
| H19 | -2.7860136593 | 0.8046068320  | 5.5063066846  |
| H20 | -1.1013261388 | 0.5485228644  | 5.0609985858  |
| C21 | -0.4981429670 | 1.5963053576  | 13.6607141746 |
| C22 | -1.0542851821 | 2.1760880753  | 12.3482453526 |
| C23 | -2.2509686747 | 1.3450813797  | 11.8224115392 |
| C24 | -1.8324228564 | -0.1343704619 | 11.6607150446 |
| C25 | -1.2907952976 | -0.7084060447 | 12.9840865410 |
| C26 | -0.1130494949 | 0.1172667853  | 13.5189918549 |
| H27 | -1.2588493171 | 1.7009029546  | 14.4484948279 |
| H28 | 0.3662719636  | 2.1896607767  | 13.9829709080 |
| H29 | -0.2585064939 | 2.1889958381  | 11.5886245390 |
| H30 | -1.3547677357 | 3.2181554426  | 12.4996447533 |
| H31 | -3.0489222651 | 1.3976853852  | 12.5797825964 |
| H32 | -2.6685268804 | -0.7478086466 | 11.3132799707 |
| H33 | -1.0447737603 | -0.2047297724 | 10.8977623966 |
| H34 | -2.0992047374 | -0.7202549418 | 13.7301541963 |
| H35 | -0.9911991169 | -1.7533089596 | 12.8327477470 |
| H36 | 0.7363798217  | 0.0266154348  | 12.8257530980 |
| H37 | 0.2263139940  | -0.2831909967 | 14.4824866802 |
| C38 | -7.2354422168 | 2.1717417428  | 10.8639609272 |
| C39 | -5.7501332513 | 2.5281937151  | 11.0517592756 |
| C40 | -4.8330459156 | 1.6069470507  | 10.2104294941 |
| C41 | -5.1157892222 | 0.1273047908  | 10.5589450745 |
| C42 | -6.6023491295 | -0.2221356543 | 10.3530057234 |
| C43 | -7.5187699050 | 0.6949783200  | 11.1747565342 |
| H44 | -7.5260752741 | 2.3871631465  | 9.8251003750  |
| H45 | -7.8473780528 | 2.8237494845  | 11.4992307215 |
| H46 | -5.4835764960 | 2.4324780438  | 12.1148790311 |
| H47 | -5.5814515069 | 3.5765137275  | 10.7835331812 |
| H48 | -5.0821280934 | 1.7688432514  | 9.1499967334  |
| H49 | -4.4976285135 | -0.5469607937 | 9.9590578062  |
| H50 | -4.8556055565 | -0.0512497322 | 11.6114391141 |
| H51 | -6.8507140812 | -0.1268665638 | 9.2855604539  |
| H52 | -6.7691995287 | -1.2737678048 | 10.6191584520 |
| H53 | -7.3504133400 | 0.5088924850  | 12.2458937500 |
| H54 | -8.5717519116 | 0.4575212667  | 10.9780052708 |

#### Conformer C

|     |               |               |               |
|-----|---------------|---------------|---------------|
| P1  | -3.3810099893 | 1.9890534321  | 10.0629077579 |
| Au2 | -3.2560637686 | 4.2912089290  | 9.9923770185  |
| Cl3 | -3.1028024626 | 6.6171083403  | 9.9244854771  |
| C4  | -0.0859888076 | 0.7927032772  | 7.6976773486  |
| C5  | -0.8846158103 | 1.4257186198  | 8.8519525577  |
| C6  | -2.4033483549 | 1.1968122552  | 8.6754442268  |
| C7  | -2.8681164609 | 1.7278599772  | 7.2989125108  |
| C8  | -2.0689631674 | 1.0864931774  | 6.1508672767  |
| C9  | -0.5590245905 | 1.3022291231  | 6.3286907035  |
| H10 | -0.1983827508 | -0.3011721795 | 7.7382824675  |
| H11 | 0.9818962629  | 1.0021466132  | 7.8371742947  |
| H12 | -0.5361035913 | 1.0082747545  | 9.8039415050  |
| H13 | -0.6852883110 | 2.5060944117  | 8.8874542111  |
| H14 | -2.5980541469 | 0.1156856288  | 8.7171006499  |
| H15 | -3.9388516944 | 1.5446009741  | 7.1519437754  |
| H16 | -2.7325847312 | 2.8179454800  | 7.2753347329  |

|     |               |               |               |
|-----|---------------|---------------|---------------|
| H17 | -2.2832178973 | 0.0077090263  | 6.1146904989  |
| H18 | -2.4061773187 | 1.5044800010  | 5.1942019695  |
| H19 | -0.3346295365 | 2.3752209248  | 6.2433700770  |
| H20 | -0.0046155035 | 0.8009690270  | 5.5253565633  |
| C21 | -1.8599269347 | -0.5716048105 | 13.1309513446 |
| C22 | -2.6017602948 | -0.1802995396 | 11.8383801939 |
| C23 | -2.6383295725 | 1.3538913481  | 11.6677941972 |
| C24 | -3.2869301529 | 2.0248672038  | 12.9003085428 |
| C25 | -2.5531597817 | 1.6260001167  | 14.1933411786 |
| C26 | -2.4835208524 | 0.1003115678  | 14.3643514489 |
| H27 | -0.8049228046 | -0.2724734708 | 13.0454340979 |
| H28 | -1.8670021058 | -1.6632443337 | 13.2431254722 |
| H29 | -3.6278400839 | -0.5689672305 | 11.8900372064 |
| H30 | -2.1228213227 | -0.6603453333 | 10.9759313298 |
| H31 | -1.6014202991 | 1.7159457778  | 11.6169157095 |
| H32 | -3.2792029216 | 3.1148403098  | 12.7835047098 |
| H33 | -4.3407868202 | 1.7208119299  | 12.9786159936 |
| H34 | -1.5337630674 | 2.0377409351  | 14.1677222877 |
| H35 | -3.0528506572 | 2.0860694555  | 15.0547874999 |
| H36 | -3.4991552548 | -0.2949617753 | 14.5158868766 |
| H37 | -1.9118383947 | -0.1557718957 | 15.2651037046 |
| C38 | -6.7454829993 | -0.5919856771 | 9.5024705415  |
| C39 | -5.2888746049 | -0.1003227379 | 9.4025932604  |
| C40 | -5.1440954532 | 1.3236015015  | 9.9882054627  |
| C41 | -6.1135204013 | 2.3008937871  | 9.2831132041  |
| C42 | -7.5661959169 | 1.8017165985  | 9.3716256148  |
| C43 | -7.7184995140 | 0.3778307043  | 8.8152378139  |
| H44 | -7.0197660643 | -0.6951744716 | 10.5628379784 |
| H45 | -6.8243113576 | -1.5936630521 | 9.0608796106  |
| H46 | -4.9907967154 | -0.0945493774 | 8.3458044587  |
| H47 | -4.6244934083 | -0.8068262349 | 9.9121956006  |
| H48 | -5.4394002475 | 1.2832086693  | 11.0473586720 |
| H49 | -6.0298787928 | 3.2990007742  | 9.7271096821  |
| H50 | -5.8276177985 | 2.4075790762  | 8.2274987698  |
| H51 | -7.8885042745 | 1.8176251419  | 10.4234616102 |
| H52 | -8.2238207196 | 2.4962570513  | 8.8345405714  |
| H53 | -7.5164817658 | 0.3867908198  | 7.7338249267  |
| H54 | -8.7515842885 | 0.0287331292  | 8.9369346109  |

#### Conformer D

|     |               |               |               |
|-----|---------------|---------------|---------------|
| P1  | -3.2996259897 | 2.0783624294  | 10.1010948410 |
| Au2 | -3.3523974068 | 4.3816380604  | 10.0472817783 |
| Cl3 | -3.3819768174 | 6.7135251816  | 10.0015763515 |
| C4  | -0.1090560388 | 0.5179909292  | 7.7141163224  |
| C5  | -0.8353093015 | 1.1145181381  | 8.9356707072  |
| C6  | -2.3377168623 | 1.3386250323  | 8.6475442742  |
| C7  | -2.4952720823 | 2.2227211725  | 7.3841108065  |
| C8  | -1.7832863281 | 1.6081930297  | 6.1667338014  |
| C9  | -0.2941019102 | 1.3728054859  | 6.4530692232  |
| H10 | -0.4981651546 | -0.4942325486 | 7.5273681996  |
| H11 | 0.9571328552  | 0.4032331523  | 7.9476248479  |
| H12 | -0.6951028843 | 0.4416610800  | 9.7886171078  |
| H13 | -0.3700700218 | 2.0745393902  | 9.2033870551  |
| H14 | -2.7949908520 | 0.3565525415  | 8.4503314683  |
| H15 | -3.5503273459 | 2.3961050476  | 7.1528367358  |
| H16 | -2.0655683381 | 3.2111173819  | 7.5961426047  |
| H17 | -2.2626620469 | 0.6533819534  | 5.9022530467  |

|     |               |               |               |
|-----|---------------|---------------|---------------|
| H18 | -1.9070816737 | 2.2702490360  | 5.3006588959  |
| H19 | 0.2045619910  | 2.3428818764  | 6.5936301240  |
| H20 | 0.1913395537  | 0.8913262080  | 5.5947869256  |
| C21 | -1.7772471300 | -0.5252079988 | 13.1164507623 |
| C22 | -2.6401894465 | -0.0642434999 | 11.9261144368 |
| C23 | -2.4579971964 | 1.4464724626  | 11.6635333804 |
| C24 | -2.7733992502 | 2.2730294046  | 12.9330201645 |
| C25 | -1.9060661309 | 1.8036765143  | 14.1150074161 |
| C26 | -2.0693882016 | 0.2989056127  | 14.3796588195 |
| H27 | -0.7143517656 | -0.4214283715 | 12.8525413991 |
| H28 | -1.9493070198 | -1.5925956792 | 13.3056143507 |
| H29 | -3.6956395176 | -0.2731066456 | 12.1490097512 |
| H30 | -2.3864566546 | -0.6506691822 | 11.0331329918 |
| H31 | -1.3958025374 | 1.6252067577  | 11.4481909029 |
| H32 | -2.6040619768 | 3.3383588508  | 12.7397196499 |
| H33 | -3.8313759791 | 2.1690657633  | 13.2029268815 |
| H34 | -0.8503014868 | 2.0246322382  | 13.8982233270 |
| H35 | -2.1664410065 | 2.3792719677  | 15.0119590284 |
| H36 | -3.0990951623 | 0.0986255761  | 14.7114476198 |
| H37 | -1.4106114795 | -0.0182226154 | 15.1979612216 |
| C38 | -7.0629680730 | 0.7877462487  | 8.5923632543  |
| C39 | -5.6718495676 | 1.4473452975  | 8.6353846175  |
| C40 | -4.9978690385 | 1.2693311416  | 10.0153228223 |
| C41 | -5.9295807098 | 1.7852964267  | 11.1373884340 |
| C42 | -7.3201003498 | 1.1269270862  | 11.0805574783 |
| C43 | -7.9789804850 | 1.3097879085  | 9.7069466634  |
| H44 | -6.9487560510 | -0.3019541217 | 8.6950914002  |
| H45 | -7.5158421298 | 0.9624159638  | 7.6082037665  |
| H46 | -5.7692012754 | 2.5198593812  | 8.4151973438  |
| H47 | -5.0494675836 | 1.0134745070  | 7.8453600825  |
| H48 | -4.8246140382 | 0.1935680315  | 10.1704843730 |
| H49 | -5.4857639344 | 1.6040994329  | 12.1211057980 |
| H50 | -6.0343245453 | 2.8747316453  | 11.0377491932 |
| H51 | -7.2230571322 | 0.0524665211  | 11.2984106214 |
| H52 | -7.9545207715 | 1.5489592346  | 11.8701419815 |
| H53 | -8.1832497577 | 2.3774269028  | 9.5408210313  |
| H54 | -8.9478673710 | 0.7953953474  | 9.6756391699  |

#### Conformer E

|     |               |              |               |
|-----|---------------|--------------|---------------|
| P1  | -3.2439855580 | 1.9644431422 | 10.0051465304 |
| Au2 | -3.2521128180 | 4.2734057632 | 10.0320827623 |
| Cl3 | -3.2567448764 | 6.6059636886 | 10.0534870539 |
| C4  | -0.0237047623 | 1.1563744527 | 7.3787189767  |
| C5  | -0.8033680060 | 1.7012915366 | 8.5894692704  |
| C6  | -2.2911708960 | 1.2804430584 | 8.5422318967  |
| C7  | -2.9236606193 | 1.7317725793 | 7.2039515973  |
| C8  | -2.1411676650 | 1.1842295262 | 5.9966397243  |
| C9  | -0.6610455715 | 1.5876755613 | 6.0504125740  |
| H10 | 0.0044776945  | 0.0573989913 | 7.4304763564  |
| H11 | 1.0174875294  | 1.4983248763 | 7.4337125906  |
| H12 | -0.3293353719 | 1.3515444194 | 9.5126839367  |
| H13 | -0.7439992586 | 2.7987381631 | 8.6015649010  |
| H14 | -2.3479855694 | 0.1841564833 | 8.6058441753  |
| H15 | -3.9678277900 | 1.4081536889 | 7.1372627926  |
| H16 | -2.9330389623 | 2.8302071922 | 7.1678785594  |
| H17 | -2.2209722554 | 0.0867029553 | 5.9794666009  |
| H18 | -2.6041098913 | 1.5455767633 | 5.0697295825  |

|     |               |               |               |
|-----|---------------|---------------|---------------|
| H19 | -0.5785287707 | 2.6792034516  | 5.9455887346  |
| H20 | -0.1154415379 | 1.1482414405  | 5.2058669867  |
| C21 | -0.9874773611 | 1.6545855051  | 13.5983062553 |
| C22 | -1.4232903049 | 2.1699347360  | 12.2152720563 |
| C23 | -2.5102560967 | 1.2576798000  | 11.5976522779 |
| C24 | -2.0189957708 | -0.2061779406 | 11.5276402801 |
| C25 | -1.5785711380 | -0.7108001870 | 12.9155235601 |
| C26 | -0.5083652444 | 0.1965959959  | 13.5393213182 |
| H27 | -1.8353302274 | 1.7318816054  | 14.2952903386 |
| H28 | -0.1972870774 | 2.3028689512  | 13.9969651094 |
| H29 | -0.5487221684 | 2.2115857962  | 11.5527044367 |
| H30 | -1.7986343124 | 3.1960564120  | 12.2971867724 |
| H31 | -3.3739993143 | 1.2888400312  | 12.2803006602 |
| H32 | -2.8000071167 | -0.8655280607 | 11.1344273313 |
| H33 | -1.1688229550 | -0.2776408205 | 10.8358311538 |
| H34 | -2.4556831061 | -0.7489667963 | 13.5786023944 |
| H35 | -1.2079863878 | -1.7403028761 | 12.8290054383 |
| H36 | 0.4112827632  | 0.1396484562  | 12.9379261227 |
| H37 | -0.2476973608 | -0.1607286232 | 14.5435292643 |
| C38 | -6.5757034003 | -0.7063081019 | 9.5803143334  |
| C39 | -5.1287750750 | -0.1950724364 | 9.4394826073  |
| C40 | -4.9966296562 | 1.2551674041  | 9.9593387433  |
| C41 | -6.0003471903 | 2.1849790992  | 9.2349622887  |
| C42 | -7.4417589086 | 1.6630789540  | 9.3724319612  |
| C43 | -7.5770046909 | 0.2174359796  | 8.8720967289  |
| H44 | -6.8319658174 | -0.7719310577 | 10.6482503076 |
| H45 | -6.6429435760 | -1.7261408344 | 9.1801128532  |
| H46 | -4.8396749457 | -0.2354982791 | 8.3808265978  |
| H47 | -4.4525210738 | -0.8697791123 | 9.9749216400  |
| H48 | -5.2757054075 | 1.2548418119  | 11.0246928893 |
| H49 | -5.9283113350 | 3.2009730369  | 9.6386196168  |
| H50 | -5.7413001905 | 2.2558925974  | 8.1701443042  |
| H51 | -7.7436593278 | 1.7124073253  | 10.4293472306 |
| H52 | -8.1232287392 | 2.3247503365  | 8.8234108544  |
| H53 | -7.3931601747 | 0.1884628139  | 7.7876491656  |
| H54 | -8.6011606930 | -0.1455636631 | 9.0251569405  |

#### Conformer F

|     |               |               |               |
|-----|---------------|---------------|---------------|
| P1  | -3.3734826959 | 2.0635407525  | 10.2163861496 |
| Au2 | -3.2150817163 | 4.3586730345  | 10.0671885649 |
| Cl3 | -3.0269602435 | 6.6786655846  | 9.9217436052  |
| C4  | -0.1925827242 | 0.8559960451  | 7.7091671049  |
| C5  | -0.9553133316 | 1.5388608829  | 8.8584968313  |
| C6  | -2.4655609574 | 1.2069996007  | 8.8149570410  |
| C7  | -3.0578754134 | 1.5755466455  | 7.4344515403  |
| C8  | -2.2847984060 | 0.8957123047  | 6.2893754099  |
| C9  | -0.7854120302 | 1.2214156733  | 6.3410153190  |
| H10 | -0.2311689082 | -0.2353787142 | 7.8445784051  |
| H11 | 0.8660784448  | 1.1395066426  | 7.7572515715  |
| H12 | -0.5181805529 | 1.2354468092  | 9.8172013907  |
| H13 | -0.8289605004 | 2.6281279728  | 8.7862916150  |
| H14 | -2.5868047399 | 0.1241540638  | 8.9645957545  |
| H15 | -4.1137843387 | 1.2875188757  | 7.3744840134  |
| H16 | -3.0190843027 | 2.6664735287  | 7.3069116413  |
| H17 | -2.4238739186 | -0.1938396115 | 6.3557185636  |
| H18 | -2.7125079856 | 1.2068000359  | 5.3282281726  |
| H19 | -0.6400629515 | 2.2956612657  | 6.1572915573  |

|     |               |                |               |
|-----|---------------|----------------|---------------|
| H20 | -0.2534713498 | 0.6908596861   | 5.5414378136  |
| C21 | -1.4192101261 | -0.35297778311 | 13.1654283173 |
| C22 | -2.2736051903 | -0.0537279160  | 11.9179874330 |
| C23 | -2.5341066572 | 1.4636772605   | 11.7896031511 |
| C24 | -3.2061400161 | 2.0145856994   | 13.0677658950 |
| C25 | -2.3489452301 | 1.7116900215   | 14.3094998970 |
| C26 | -2.0598679195 | 0.2086613138   | 14.4440018591 |
| H27 | -0.4216555299 | 0.0906292745   | 13.0320009285 |
| H28 | -1.2692970155 | -1.4361735609  | 13.2564541159 |
| H29 | -3.2263409182 | -0.5913733430  | 11.9995818057 |
| H30 | -1.7682248591 | -0.4430498662  | 11.0262889843 |
| H31 | -1.5559667357 | 1.9608406017   | 11.7099289158 |
| H32 | -3.3706549675 | 3.0949401971   | 12.9760465853 |
| H33 | -4.1917887758 | 1.5473980312   | 13.1948501669 |
| H34 | -1.4009980452 | 2.2638789010   | 14.2349887846 |
| H35 | -2.8575289006 | 2.0849536540   | 15.2070120165 |
| H36 | -3.0017153048 | -0.3251427814  | 14.6407968599 |
| H37 | -1.4091223804 | 0.0213655596   | 15.3072893178 |
| C38 | -7.5909219433 | 1.9512213048   | 10.6336649730 |
| C39 | -6.1304063692 | 2.3062325501   | 10.9668659100 |
| C40 | -5.1574578521 | 1.4919492142   | 10.0824815695 |
| C41 | -5.4085091072 | -0.0226723750  | 10.2446064329 |
| C42 | -6.8711993257 | -0.3711045521  | 9.9074568383  |
| C43 | -7.8558264715 | 0.4430137214   | 10.7612780652 |
| H44 | -7.8145087517 | 2.2762104568   | 9.6070008006  |
| H45 | -8.2643127816 | 2.5140679938   | 11.2917098380 |
| H46 | -5.9419187287 | 2.0920494552   | 12.0263389517 |
| H47 | -5.9604058379 | 3.3798589755   | 10.8257733547 |
| H48 | -5.3913572892 | 1.7600871880   | 9.0417713910  |
| H49 | -4.7302469308 | -0.6061306156  | 9.6098885343  |
| H50 | -5.2051831155 | -0.3173244237  | 11.2821312123 |
| H51 | -7.0548317121 | -0.1669179516  | 8.8423624168  |
| H52 | -7.0363522444 | -1.4462103151  | 10.0519965524 |
| H53 | -7.7520719967 | 0.1440685750   | 11.8150818566 |
| H54 | -8.8888016761 | 0.2124679849   | 10.4723111147 |

#### Conformer G

|     |               |               |               |
|-----|---------------|---------------|---------------|
| P1  | -3.0694984766 | 2.2220856361  | 10.1620644116 |
| Au2 | -2.9351552008 | 4.5026805952  | 10.5375458355 |
| Cl3 | -2.8310291802 | 6.7986770544  | 10.9353351069 |
| C4  | -1.0381022175 | 2.4385511655  | 6.4430790203  |
| C5  | -2.0021191630 | 2.8196738011  | 7.5803210422  |
| C6  | -2.0873927186 | 1.6945914457  | 8.6406461406  |
| C7  | -2.5036012185 | 0.3637007775  | 7.9716917459  |
| C8  | -1.5275837912 | -0.0146929676 | 6.8416456637  |
| C9  | -1.4180300366 | 1.1005152463  | 5.7921979735  |
| H10 | -0.0166913205 | 2.3706156432  | 6.8460306204  |
| H11 | -1.0235396590 | 3.2392175232  | 5.6933863981  |
| H12 | -1.6789647683 | 3.7557870933  | 8.0481889893  |
| H13 | -3.0013743179 | 3.0082479786  | 7.1644203675  |
| H14 | -1.0745352193 | 1.5644569877  | 9.0539809347  |
| H15 | -2.5547965612 | -0.4495922749 | 8.7011492720  |
| H16 | -3.5098593319 | 0.4728153893  | 7.5462393390  |
| H17 | -0.5348035016 | -0.2115210236 | 7.2728853927  |
| H18 | -1.8554927077 | -0.9519303753 | 6.3740312189  |
| H19 | -2.3845052994 | 1.2080536312  | 5.2776177430  |
| H20 | -0.6842303459 | 0.8280595911  | 5.0233252860  |

|     |               |               |               |
|-----|---------------|---------------|---------------|
| C21 | -0.6593840980 | 1.3214406302  | 13.5250124848 |
| C22 | -1.1557712662 | 2.0098200734  | 12.2417386322 |
| C23 | -2.3702855286 | 1.2674019391  | 11.6304800314 |
| C24 | -2.0070105282 | -0.2146784294 | 11.3810461660 |
| C25 | -1.5271350548 | -0.8978703495 | 12.6758015268 |
| C26 | -0.3315750209 | -0.1600631013 | 13.2935496797 |
| H27 | -1.4360275135 | 1.4065771506  | 14.2993326620 |
| H28 | 0.2198072345  | 1.8547648231  | 13.9068312757 |
| H29 | -0.3395420868 | 2.0392294089  | 11.5044295355 |
| H30 | -1.4181298898 | 3.0513874401  | 12.4550264255 |
| H31 | -3.1893015602 | 1.3053934959  | 12.3659277945 |
| H32 | -2.8550620052 | -0.7690325866 | 10.9678183567 |
| H33 | -1.2001771608 | -0.2678192485 | 10.6370913546 |
| H34 | -2.3555992051 | -0.9245136040 | 13.3990215241 |
| H35 | -1.2663294045 | -1.9421460609 | 12.4616318219 |
| H36 | 0.5318468719  | -0.2409575600 | 12.6165202563 |
| H37 | -0.0349549263 | -0.6372574704 | 14.2359096836 |
| C38 | -6.8500926425 | 0.1660031123  | 10.1672920754 |
| C39 | -5.3145617044 | 0.2998065666  | 10.1456572192 |
| C40 | -4.8968738199 | 1.7825578871  | 10.0356630988 |
| C41 | -5.5470861712 | 2.4574522807  | 8.8048681476  |
| C42 | -7.0784076403 | 2.3077407587  | 8.8344021825  |
| C43 | -7.5014566334 | 0.8354124411  | 8.9480640455  |
| H44 | -7.2374340371 | 0.6299258942  | 11.0862396805 |
| H45 | -7.1225097827 | -0.8959793063 | 10.2150957675 |
| H46 | -4.9157118646 | -0.2711042996 | 9.2984467475  |
| H47 | -4.9031109856 | -0.1482554847 | 11.0568056944 |
| H48 | -5.2891464453 | 2.2968112766  | 10.9268676716 |
| H49 | -5.2746635515 | 3.5190782259  | 8.7703173328  |
| H50 | -5.1605967901 | 1.9969701144  | 7.8850767683  |
| H51 | -7.4779688855 | 2.8711449848  | 9.6899235908  |
| H52 | -7.5077391075 | 2.7630388895  | 7.9333249225  |
| H53 | -7.2014461242 | 0.2989403436  | 8.0353162616  |
| H54 | -8.5938814189 | 0.7563613159  | 9.0114919485  |

#### [PdCl<sub>3</sub>(PCy<sub>3</sub>)]<sup>-</sup>

##### Conformer A, $\tau_1$

|     |               |               |               |
|-----|---------------|---------------|---------------|
| P1  | -0.2337132352 | 0.1676683730  | 0.0714302330  |
| Pd1 | -0.0225274647 | 0.0751322013  | 2.4471358697  |
| C4  | -0.1970464065 | 4.3587988089  | -0.8459243437 |
| C5  | 0.0064042017  | 3.0474023031  | -0.0678318469 |
| C6  | -0.6348125624 | 1.8399386550  | -0.7858020215 |
| C7  | -2.1321213476 | 2.1305946378  | -1.0343434274 |
| C8  | -2.3382456957 | 3.4503707306  | -1.8045358461 |
| C9  | -1.6820684778 | 4.6442945757  | -1.1006555942 |
| H10 | 0.3306931654  | 4.3016921984  | -1.8116804888 |
| H11 | 0.2637879529  | 5.1850880304  | -0.2886430496 |
| H12 | 1.0675957100  | 2.8806682007  | 0.1113451880  |
| H13 | -0.4367502953 | 3.1385311037  | 0.9315871179  |
| H14 | -0.1712243606 | 1.7355635012  | -1.7796071579 |
| H15 | -2.5954877941 | 1.3261774182  | -1.6116588086 |
| H16 | -2.6614987524 | 2.1879525892  | -0.0732924949 |
| H17 | -1.9084209054 | 3.3464467033  | -2.8132745722 |
| H18 | -3.4144111841 | 3.6251407862  | -1.9422773679 |
| H19 | -2.1861053642 | 4.8206923079  | -0.1388860344 |
| H20 | -1.8100513275 | 5.5588525803  | -1.6968169653 |
| C21 | 3.3891315145  | -1.9390879259 | -0.6233314978 |

|     |               |               |               |
|-----|---------------|---------------|---------------|
| C22 | 2.1538246071  | -1.3800417513 | 0.1049530324  |
| C23 | 1.4109023575  | -0.3340335931 | -0.7607757277 |
| C24 | 2.3893044764  | 0.8061412085  | -1.1221510866 |
| C25 | 3.6229407129  | 0.2540151464  | -1.8632501044 |
| C26 | 4.3525951801  | -0.8177325267 | -1.0399257476 |
| H27 | 3.0702135549  | -2.4959435459 | -1.5193928722 |
| H28 | 3.9030187787  | -2.6610652675 | 0.0253730445  |
| H29 | 2.4593924716  | -0.8918365908 | 1.0377298080  |
| H30 | 1.4886980718  | -2.1991884557 | 0.3948109699  |
| H31 | 1.1062581888  | -0.8074374027 | -1.7080644383 |
| H32 | 1.9076231326  | 1.5591278660  | -1.7564805384 |
| H33 | 2.7046755841  | 1.3066906185  | -0.2004830842 |
| H34 | 3.3078803817  | -0.1798812999 | -2.8260692285 |
| H35 | 4.3057573860  | 1.0809565770  | -2.1034984914 |
| H36 | 4.7715188871  | -0.3518762788 | -0.1367217435 |
| H37 | 5.1998019082  | -1.2267850464 | -1.6088186927 |
| C38 | -3.8377889394 | -1.8319867579 | -1.1275656097 |
| C39 | -2.8912114230 | -0.9754904261 | -0.2673186095 |
| C40 | -1.4447869467 | -1.0099907378 | -0.8213916434 |
| C41 | -0.9664761160 | -2.4824582163 | -0.8573165442 |
| C42 | -1.9138030600 | -3.3616118093 | -1.6963816052 |
| C43 | -3.3634884784 | -3.2901266229 | -1.1975481122 |
| H44 | -3.8994866298 | -1.4180414114 | -2.1479136203 |
| H45 | -4.8528326954 | -1.7840463793 | -0.7100592321 |
| H46 | -2.8761946403 | -1.3610742155 | 0.7556780456  |
| H47 | -3.2794334936 | 0.0422703360  | -0.2053890228 |
| H48 | -1.4589058466 | -0.6364067503 | -1.8609317592 |
| H49 | 0.0390888933  | -2.5628926252 | -1.2815896825 |
| H50 | -0.9223795032 | -2.8580547731 | 0.1717604525  |
| H51 | -1.8775650283 | -3.0334594590 | -2.7478792160 |
| H52 | -1.5543270317 | -4.3999263763 | -1.6823143253 |
| H53 | -3.4228900789 | -3.7331103016 | -0.1936616953 |
| H54 | -4.0218668835 | -3.8829058896 | -1.8486495058 |

#### Conformer A, $\tau_2$

|     |               |               |               |
|-----|---------------|---------------|---------------|
| Pd1 | -0.2374135785 | 0.0542683030  | 2.4648490980  |
| Cl2 | -0.4488848483 | -0.1291644777 | 4.8276199866  |
| Cl3 | 0.4211852368  | -2.2518764486 | 2.4311058816  |
| Cl4 | -1.3188404662 | 2.1813816499  | 2.6254620228  |
| P1  | 0.0501324500  | 0.1787356507  | 0.1005535940  |
| C4  | 0.2160805585  | 4.2974965479  | -1.0623373182 |
| C5  | 0.3916290447  | 3.0456692728  | -0.1847186886 |
| C6  | -0.3175171629 | 1.8178854516  | -0.8096004695 |
| C7  | -1.8204450022 | 2.1495197329  | -0.9727793147 |
| C8  | -2.0202848093 | 3.4109217038  | -1.8358482218 |
| C9  | -1.2694196263 | 4.6251070629  | -1.2713631390 |
| H10 | 0.6966364358  | 4.1423322238  | -2.0427719610 |
| H11 | 0.7304363422  | 5.1481270074  | -0.5946235840 |
| H12 | 1.4552127243  | 2.8608935358  | -0.0199320460 |
| H13 | -0.0454332088 | 3.2183742735  | 0.8041799437  |
| H14 | 0.0901612585  | 1.6499281775  | -1.8220534324 |
| H15 | -2.3617521366 | 1.3226898133  | -1.4436467977 |
| H16 | -2.2535564700 | 2.3038748729  | 0.0221108020  |
| H17 | -1.6643397820 | 3.2098155216  | -2.8593809115 |
| H18 | -3.0938658949 | 3.6306615237  | -1.9180887540 |
| H19 | -1.7120016451 | 4.9040644938  | -0.3049753338 |
| H20 | -1.3863490994 | 5.4913229718  | -1.9383690417 |

|     |               |               |               |
|-----|---------------|---------------|---------------|
| C21 | 3.6930225311  | -1.9243426885 | -0.7990304075 |
| C22 | 2.4500869578  | -1.4626783510 | -0.0179353518 |
| C23 | 1.7229755424  | -0.2979514713 | -0.7238614942 |
| C24 | 2.7227712380  | 0.8628015620  | -0.9334245056 |
| C25 | 3.9760370731  | 0.4052372629  | -1.7064176733 |
| C26 | 4.6816731987  | -0.7743407947 | -1.0267480843 |
| H27 | 3.3854626257  | -2.3354055785 | -1.7742295718 |
| H28 | 4.1778387086  | -2.7457418368 | -0.2548796903 |
| H29 | 2.7452034275  | -1.1377345159 | 0.9868836472  |
| H30 | 1.7804081550  | -2.3050677405 | 0.1471557366  |
| H31 | 1.4175693189  | -0.6331722373 | -1.7286109402 |
| H32 | 2.2641564816  | 1.6832733708  | -1.4908865344 |
| H33 | 3.0279083232  | 1.2646441152  | 0.0426829866  |
| H34 | 3.6786929865  | 0.1094932270  | -2.7248348384 |
| H35 | 4.6634413763  | 1.2553490248  | -1.8186621537 |
| H36 | 5.0832876429  | -0.4464350478 | -0.0565317376 |
| H37 | 5.5399715141  | -1.1065736784 | -1.6278204904 |
| C38 | -3.5678765748 | -1.8959513052 | -0.6704127577 |
| C39 | -2.4890004199 | -1.0791187109 | 0.0623009054  |
| C40 | -1.1791644106 | -0.9996888492 | -0.7580630931 |
| C41 | -0.6767871103 | -2.4321200042 | -1.0473122685 |
| C42 | -1.7500491110 | -3.2516523450 | -1.7901889277 |
| C43 | -3.0703640822 | -3.3090148067 | -1.0080988477 |
| H44 | -3.8550345175 | -1.3793696114 | -1.6006167571 |
| H45 | -4.4730975555 | -1.9483453769 | -0.0508985817 |
| H46 | -2.2572671343 | -1.5485380226 | 1.0262299176  |
| H47 | -2.8700621420 | -0.0811285939 | 0.2979207057  |
| H48 | -1.3937031937 | -0.5283256186 | -1.7307669042 |
| H49 | 0.2344423643  | -2.4158634417 | -1.6560334589 |
| H50 | -0.4277435714 | -2.9196226955 | -0.0980414101 |
| H51 | -1.9339734206 | -2.8020917392 | -2.7794459035 |
| H52 | -1.3722028485 | -4.2668763104 | -1.9753808632 |
| H53 | -2.9093891709 | -3.8648567711 | -0.0734396726 |
| H54 | -3.8303691003 | -3.8608944772 | -1.5794381478 |

#### Conformer A, $\tau_3$

|     |               |               |               |
|-----|---------------|---------------|---------------|
| Pd1 | -0.0943182107 | 0.2896767971  | 2.4631551060  |
| Cl2 | -0.1880281754 | 0.6940977698  | 4.8058877287  |
| Cl3 | -2.4213516220 | 0.8535602006  | 2.3636812921  |
| Cl4 | 2.2794914114  | 0.1183444228  | 2.6951251421  |
| P1  | -0.0646149408 | -0.0758012037 | 0.1030459701  |
| C4  | -0.0356823373 | 4.0869736310  | -0.7188588923 |
| C5  | 0.1171990140  | 2.7546781329  | 0.0362490011  |
| C6  | -0.4495583680 | 1.5694887878  | -0.7814964258 |
| C7  | -1.9352554535 | 1.8445943181  | -1.1060017909 |
| C8  | -2.0944351726 | 3.1735189627  | -1.8698773512 |
| C9  | -1.5009494821 | 4.3569204922  | -1.0914464211 |
| H10 | 0.5748521440  | 4.0647925794  | -1.6361724305 |
| H11 | 0.3581086389  | 4.9058708229  | -0.1022418896 |
| H12 | 1.1669505387  | 2.5898469974  | 0.2971607508  |
| H13 | -0.4258780128 | 2.8020962753  | 0.9881217629  |
| H14 | 0.0881039652  | 1.5094695935  | -1.7416189049 |
| H15 | -2.3641148816 | 1.0388078574  | -1.7126322150 |
| H16 | -2.5014050823 | 1.8852195262  | -0.1685895202 |
| H17 | -1.5928101592 | 3.0950333289  | -2.8480006233 |
| H18 | -3.1586735649 | 3.3500567244  | -2.0794311273 |
| H19 | -2.0823261264 | 4.5083090705  | -0.1709033808 |

|     |               |               |               |
|-----|---------------|---------------|---------------|
| H20 | -1.5871929031 | 5.2827825479  | -1.6779345998 |
| C21 | 3.4612196734  | -2.2699885531 | -0.9449632578 |
| C22 | 2.2575454986  | -1.8016675522 | -0.1083393971 |
| C23 | 1.5655690630  | -0.5762651762 | -0.7564763028 |
| C24 | 2.6026081998  | 0.5643479738  | -0.8918351178 |
| C25 | 3.8248052785  | 0.1094217884  | -1.7133787740 |
| C26 | 4.4879939018  | -1.1418419986 | -1.1206558009 |
| H27 | 3.1218656553  | -2.6120004872 | -1.9369184115 |
| H28 | 3.9293032981  | -3.1372893746 | -0.4596245332 |
| H29 | 2.5918720201  | -1.5095709656 | 0.8906648016  |
| H30 | 1.5639395837  | -2.6331465159 | 0.0321607794  |
| H31 | 1.2465527561  | -0.8483302708 | -1.7779607272 |
| H32 | 2.1657746141  | 1.4410568620  | -1.3813506340 |
| H33 | 2.9194922105  | 0.8699770837  | 0.1118556633  |
| H34 | 3.5083074803  | -0.1044951746 | -2.7472210839 |
| H35 | 4.5497666504  | 0.9329499691  | -1.7746363009 |
| H36 | 4.9141761456  | -0.8919933521 | -0.1390402309 |
| H37 | 5.3220412276  | -1.4708518603 | -1.7569970173 |
| C38 | -3.6813140445 | -2.1841668390 | -0.8751465055 |
| C39 | -2.6770126563 | -1.3383764559 | -0.0728810489 |
| C40 | -1.2897667004 | -1.2921844625 | -0.7484701718 |
| C41 | -0.7803403298 | -2.7379065655 | -0.9475617439 |
| C42 | -1.7856667331 | -3.5920521365 | -1.7456858360 |
| C43 | -3.1741780457 | -3.6146926876 | -1.0952441869 |
| H44 | -3.8641002072 | -1.7109219035 | -1.8534200816 |
| H45 | -4.6459048081 | -2.1949126549 | -0.3505388799 |
| H46 | -2.5649695835 | -1.7551806101 | 0.9354301450  |
| H47 | -3.0745970780 | -0.3366698130 | 0.0824357986  |
| H48 | -1.4064712399 | -0.8608036048 | -1.7557661306 |
| H49 | 0.1732938669  | -2.7515710534 | -1.4812904793 |
| H50 | -0.6100918266 | -3.2048392972 | 0.0324929638  |
| H51 | -1.8710713062 | -3.1841206020 | -2.7651521546 |
| H52 | -1.3909036428 | -4.6121977311 | -1.8517369911 |
| H53 | -3.1113296901 | -4.1287686613 | -0.1246543778 |
| H54 | -3.8780428213 | -4.1907224544 | -1.7124924476 |

#### Conformer B, $\tau_2$

|     |           |           |           |
|-----|-----------|-----------|-----------|
| P1  | 0.000000  | 0.000000  | 0.000000  |
| Pd1 | 0.000000  | 0.000000  | 2.354868  |
| C4  | 4.196101  | 0.000000  | -0.581032 |
| C5  | 2.821713  | -0.161040 | 0.091348  |
| C6  | 1.678957  | 0.368638  | -0.811827 |
| C7  | 1.951881  | 1.847947  | -1.169387 |
| C8  | 3.327409  | 2.011000  | -1.844073 |
| C9  | 4.463626  | 1.461669  | -0.968899 |
| H10 | 4.244565  | -0.630761 | -1.483531 |
| H11 | 4.980236  | -0.364243 | 0.096344  |
| H12 | 2.656362  | -1.211411 | 0.351986  |
| H13 | 2.799025  | 0.399074  | 1.033085  |
| H14 | 1.684869  | -0.208554 | -1.749541 |
| H15 | 1.180562  | 2.239480  | -1.840892 |
| H16 | 1.914266  | 2.443251  | -0.251082 |
| H17 | 3.327155  | 1.480692  | -2.810300 |
| H18 | 3.500167  | 3.072166  | -2.071538 |
| H19 | 4.537577  | 2.067019  | -0.054474 |
| H20 | 5.427182  | 1.552906  | -1.490367 |
| C21 | -0.063513 | -4.134230 | -0.913508 |

|     |           |           |           |
|-----|-----------|-----------|-----------|
| C22 | 0.450701  | -2.768547 | -0.429945 |
| C23 | -0.527411 | -1.629170 | -0.807022 |
| C24 | -0.757676 | -1.630879 | -2.333946 |
| C25 | -1.264945 | -3.002197 | -2.824755 |
| C26 | -0.320336 | -4.144475 | -2.426658 |
| H27 | -0.993615 | -4.369978 | -0.377360 |
| H28 | 0.659310  | -4.915876 | -0.643009 |
| H29 | 1.434162  | -2.583534 | -0.886274 |
| H30 | 0.573669  | -2.794571 | 0.656729  |
| H31 | -1.475776 | -1.851191 | -0.300372 |
| H32 | -1.480654 | -0.866682 | -2.626468 |
| H33 | 0.180738  | -1.390499 | -2.855997 |
| H34 | -2.258342 | -3.188964 | -2.390132 |
| H35 | -1.400431 | -2.976171 | -3.915400 |
| H36 | 0.636210  | -4.024130 | -2.959078 |
| H37 | -0.735873 | -5.111242 | -2.744127 |
| C38 | -3.348748 | 2.546399  | 0.221973  |
| C39 | -2.524233 | 1.250566  | 0.328089  |
| C40 | -1.206648 | 1.376014  | -0.474656 |
| C41 | -1.539560 | 1.686559  | -1.950309 |
| C42 | -2.314240 | 3.014790  | -2.051451 |
| C43 | -3.616430 | 2.954564  | -1.236025 |
| H44 | -2.799194 | 3.351323  | 0.730738  |
| H45 | -4.297347 | 2.426828  | 0.762211  |
| H46 | -3.112656 | 0.402154  | -0.052966 |
| H47 | -2.304748 | 1.035534  | 1.378958  |
| H48 | -0.668212 | 2.237612  | -0.054468 |
| H49 | -0.642296 | 1.721251  | -2.577948 |
| H50 | -2.178927 | 0.895041  | -2.360551 |
| H51 | -1.682150 | 3.833630  | -1.677460 |
| H52 | -2.533829 | 3.241278  | -3.104577 |
| H53 | -4.291462 | 2.218912  | -1.700650 |
| H54 | -4.136053 | 3.922169  | -1.274273 |

#### Conformer C, $\tau_1$

|     |               |               |               |
|-----|---------------|---------------|---------------|
| Pd1 | -0.2755037115 | 0.4293312556  | 2.3196700834  |
| Cl2 | -0.3817243969 | 0.8428094505  | 4.6637777093  |
| Cl3 | 1.7021300734  | -0.8772716983 | 2.6429021374  |
| Cl4 | -2.1719873762 | 1.8626741404  | 1.9745897151  |
| P1  | -0.1375264524 | 0.0791147602  | 0.0076732790  |
| C4  | 3.2153116719  | 2.4511685614  | -1.0834976103 |
| C5  | 2.3801906967  | 1.3201579192  | -0.4552347159 |
| C6  | 0.8738787928  | 1.4731269652  | -0.7816806804 |
| C7  | 0.3953754108  | 2.8687487249  | -0.3166129432 |
| C8  | 1.2224048336  | 3.9956040056  | -0.9591947759 |
| C9  | 2.7193701416  | 3.8394477194  | -0.6567562224 |
| H10 | 3.1656475713  | 2.3722808498  | -2.1815556745 |
| H11 | 4.2709882584  | 2.3195638267  | -0.8092671115 |
| H12 | 2.7666565873  | 0.3598996811  | -0.8114335627 |
| H13 | 2.5098648702  | 1.3164544946  | 0.6342680477  |
| H14 | 0.7465923092  | 1.3983089650  | -1.8735180050 |
| H15 | -0.6651723157 | 3.0156052145  | -0.5307695498 |
| H16 | 0.4826944963  | 2.9218442827  | 0.7753381635  |
| H17 | 1.0699486450  | 3.9920638407  | -2.0507678678 |
| H18 | 0.8580280127  | 4.9661073963  | -0.5966499204 |
| H19 | 2.8819257493  | 3.9637731576  | 0.4235295883  |
| H20 | 3.3017126123  | 4.6256468121  | -1.1578251799 |

|     |               |               |               |
|-----|---------------|---------------|---------------|
| C21 | 2.0314455230  | -2.8162613729 | -2.2840517111 |
| C22 | 1.1204696243  | -1.6011635087 | -2.0185988285 |
| C23 | 0.8045332157  | -1.4724417153 | -0.5123074113 |
| C24 | 0.1460009608  | -2.7693988680 | 0.0056641619  |
| C25 | 1.0595944825  | -3.9814375906 | -0.2488318636 |
| C26 | 1.4203697224  | -4.1156022825 | -1.7368293137 |
| H27 | 3.0057130865  | -2.6436109128 | -1.8033992833 |
| H28 | 2.2253283805  | -2.9096061350 | -3.3621309206 |
| H29 | 0.1901033173  | -1.7282013018 | -2.5913168772 |
| H30 | 1.6018858520  | -0.6953393948 | -2.4052927618 |
| H31 | 1.7438169578  | -1.3704717267 | 0.0424022165  |
| H32 | -0.0580177835 | -2.6748457526 | 1.0767607022  |
| H33 | -0.8121678914 | -2.9375787965 | -0.5068672283 |
| H34 | 1.9763582149  | -3.8628532811 | 0.3453937592  |
| H35 | 0.5709513259  | -4.8987508098 | 0.1068791310  |
| H36 | 0.5097231827  | -4.3522041939 | -2.3094328289 |
| H37 | 2.1126968420  | -4.9547534848 | -1.8927353696 |
| C38 | -3.5697477218 | 0.8949183984  | -2.4493420280 |
| C39 | -2.3295214214 | 1.1962250064  | -1.5867745039 |
| C40 | -1.7481959017 | -0.1007724413 | -0.9832215723 |
| C41 | -2.8363191520 | -0.8299126854 | -0.1587981167 |
| C42 | -4.0679807310 | -1.1404919901 | -1.0278258137 |
| C43 | -4.6449309103 | 0.1380986879  | -1.6544240249 |
| H44 | -3.2712355295 | 0.2919912435  | -3.3220275109 |
| H45 | -3.9786963707 | 1.8348477197  | -2.8454439601 |
| H46 | -2.6044613018 | 1.8736780543  | -0.7706970507 |
| H47 | -1.5799412402 | 1.7068088756  | -2.2037839837 |
| H48 | -1.4737346771 | -0.7550130743 | -1.8244797059 |
| H49 | -2.4414232333 | -1.7533289803 | 0.2772470011  |
| H50 | -3.1238365650 | -0.1841593351 | 0.6765516860  |
| H51 | -3.7929639540 | -1.8467755433 | -1.8278482589 |
| H52 | -4.8318983296 | -1.6405759830 | -0.4174072722 |
| H53 | -5.0235290665 | 0.7884089725  | -0.8531823221 |
| H54 | -5.5008075827 | -0.1003143736 | -2.3018486444 |

#### Conformer C, $\tau_2$

|     |               |               |               |
|-----|---------------|---------------|---------------|
| Pd1 | -0.2150919156 | -0.0103711875 | 2.4077358844  |
| Cl2 | -0.3489608572 | -0.3963241165 | 4.7530013459  |
| Cl3 | -1.9920978770 | -1.5999561147 | 2.0809783247  |
| Cl4 | 1.5821286235  | 1.5107980754  | 2.7992551744  |
| P1  | -0.0873018452 | 0.2498423661  | 0.0607887509  |
| C4  | 2.9149886840  | 2.9883159155  | -1.2904909557 |
| C5  | 2.3013642079  | 1.7426121273  | -0.6241523432 |
| C6  | 0.7571009451  | 1.7609838490  | -0.7134071007 |
| C7  | 0.1962676016  | 3.0768268778  | -0.1240242836 |
| C8  | 0.8245736986  | 4.3129993535  | -0.7912332926 |
| C9  | 2.3564160489  | 4.2880409249  | -0.6937149422 |
| H10 | 2.7061150481  | 2.9694784954  | -2.3727853738 |
| H11 | 4.0080580213  | 2.9578194855  | -1.1837253493 |
| H12 | 2.7064391079  | 0.8482457505  | -1.1116273935 |
| H13 | 2.5943242806  | 1.7004470432  | 0.4297344142  |
| H14 | 0.4889987081  | 1.7281244004  | -1.7802646794 |
| H15 | -0.8920427064 | 3.1167812941  | -0.2447866582 |
| H16 | 0.4021947469  | 3.0905483305  | 0.9519773333  |
| H17 | 0.5298373282  | 4.3514258422  | -1.8526448060 |
| H18 | 0.4263022028  | 5.2238079027  | -0.3236780946 |
| H19 | 2.6506435304  | 4.3548937272  | 0.3628813977  |

|     |               |               |               |
|-----|---------------|---------------|---------------|
| H20 | 2.7886518406  | 5.1609698664  | -1.2033768854 |
| C21 | 2.1088557683  | -2.3638201939 | -2.5570011346 |
| C22 | 1.0755949348  | -1.2900890829 | -2.1649653753 |
| C23 | 0.9274683125  | -1.1953431218 | -0.6299347716 |
| C24 | 0.5143280627  | -2.5702313239 | -0.0606910431 |
| C25 | 1.5298649812  | -3.6572377916 | -0.4573365975 |
| C26 | 1.7350329516  | -3.7368299539 | -1.9779094185 |
| H27 | 3.0993374183  | -2.0660178641 | -2.1808829986 |
| H28 | 2.1931731227  | -2.4180976262 | -3.6516761708 |
| H29 | 0.1079570439  | -1.5661260952 | -2.6050638351 |
| H30 | 1.3607150543  | -0.3261394029 | -2.6029537320 |
| H31 | 1.9186103016  | -0.9691110975 | -0.2097729544 |
| H32 | 0.4223230603  | -2.5179178945 | 1.0265331347  |
| H33 | -0.4821550643 | -2.8442888963 | -0.4329741055 |
| H34 | 2.4943729030  | -3.4403884338 | 0.0263567282  |
| H35 | 1.1986212642  | -4.6284648434 | -0.0665587453 |
| H36 | 0.8032381011  | -4.0829397304 | -2.4513266987 |
| H37 | 2.5065034418  | -4.4790641292 | -2.2264584893 |
| C38 | -3.2636386749 | 0.3298338689  | -2.8403666034 |
| C39 | -1.8638299037 | 0.6161577195  | -2.2611933991 |
| C40 | -1.7919168546 | 0.2030459743  | -0.7734541706 |
| C41 | -2.8655273437 | 0.9870134092  | 0.0208037004  |
| C42 | -4.2695059558 | 0.7071603154  | -0.5430460235 |
| C43 | -4.3658892473 | 1.0406055257  | -2.0400984321 |
| H44 | -3.4430323688 | -0.7557062883 | -2.8220824509 |
| H45 | -3.2989877310 | 0.6352124954  | -3.8959698297 |
| H46 | -1.6601322544 | 1.6925474280  | -2.3547232794 |
| H47 | -1.1096940039 | 0.1033162627  | -2.8651367229 |
| H48 | -2.0582550774 | -0.8587676464 | -0.6867321036 |
| H49 | -2.8271022010 | 0.7048384535  | 1.0746188479  |
| H50 | -2.6635153031 | 2.0654396134  | -0.0429590835 |
| H51 | -4.5065113154 | -0.3545798530 | -0.3837010653 |
| H52 | -5.0165296089 | 1.2809807560  | 0.0218247589  |
| H53 | -4.2603880313 | 2.1282554408  | -2.1760399923 |
| H54 | -5.3558469218 | 0.7715081293  | -2.4346996828 |

#### Conformer C, $\tau_3$

|     |               |               |               |
|-----|---------------|---------------|---------------|
| Pd1 | -0.1469378082 | 0.4241210017  | 2.3262967397  |
| Cl2 | -0.2458272155 | 0.8443073240  | 4.6701909889  |
| Cl3 | -2.0091322395 | 1.9027356269  | 1.9898358404  |
| Cl4 | 1.8084391982  | -0.9177014990 | 2.6488854775  |
| P1  | -0.0197489069 | 0.0546650123  | 0.0119227354  |
| C4  | 3.3597900339  | 2.3691663025  | -1.1240912565 |
| C5  | 2.5149358541  | 1.2518965212  | -0.4840511138 |
| C6  | 1.0074426359  | 1.4283215764  | -0.7914942414 |
| C7  | 0.5556555630  | 2.8320288828  | -0.3235633878 |
| C8  | 1.3916545377  | 3.9438612069  | -0.9804226336 |
| C9  | 2.8893882641  | 3.7661909300  | -0.6954628961 |
| H10 | 3.2973300318  | 2.2885365186  | -2.2213791075 |
| H11 | 4.4163028405  | 2.2225806436  | -0.8608437502 |
| H12 | 2.8819361341  | 0.2850006840  | -0.8426420327 |
| H13 | 2.6576877652  | 1.2481321624  | 0.6041156567  |
| H14 | 0.8636527375  | 1.3557486608  | -1.8814732427 |
| H15 | -0.5053059232 | 2.9939768992  | -0.5253297078 |
| H16 | 0.6575944400  | 2.8868022427  | 0.7666650240  |
| H17 | 1.2257811257  | 3.9383931659  | -2.0701030286 |
| H18 | 1.0465788780  | 4.9211219872  | -0.6173307579 |

|     |               |               |               |
|-----|---------------|---------------|---------------|
| H19 | 3.0667606146  | 3.8910957698  | 0.3824116335  |
| H20 | 3.4770343881  | 4.5425526384  | -1.2058277599 |
| C21 | 2.1082174618  | -2.8952011066 | -2.2493476977 |
| C22 | 1.2117214407  | -1.6667272874 | -1.9970699342 |
| C23 | 0.8975908549  | -1.5179496011 | -0.4918192597 |
| C24 | 0.2213108360  | -2.8009041538 | 0.0381454531  |
| C25 | 1.1188851776  | -4.0272246557 | -0.2048192162 |
| C26 | 1.4805394009  | -4.1820585950 | -1.6908737020 |
| H27 | 3.0835079981  | -2.7300849689 | -1.7679979850 |
| H28 | 2.3033227500  | -3.0000970540 | -3.3261444933 |
| H29 | 0.2796853204  | -1.7903208386 | -2.5674888723 |
| H30 | 1.7026254814  | -0.7707829354 | -2.3950358641 |
| H31 | 1.8388544639  | -1.4260189736 | 0.0617642875  |
| H32 | 0.0195082330  | -2.6945031452 | 1.1083491925  |
| H33 | -0.7395235209 | -2.9590327765 | -0.4728241136 |
| H34 | 2.0362011458  | -3.9152981904 | 0.3899681655  |
| H35 | 0.6172917481  | -4.9340363663 | 0.1596884936  |
| H36 | 0.5680953711  | -4.4132327675 | -2.2627500113 |
| H37 | 2.1631443495  | -5.0309942740 | -1.8365142857 |
| C38 | -3.4377005219 | 0.9173806822  | -2.4495287322 |
| C39 | -2.1908894692 | 1.2008501810  | -1.5906427687 |
| C40 | -1.6339171106 | -0.1035467651 | -0.9794714058 |
| C41 | -2.7356620549 | -0.8067345999 | -0.1502847826 |
| C42 | -3.9812048097 | -1.0910403526 | -1.0087235285 |
| C43 | -4.5298016002 | 0.1943309398  | -1.6469974008 |
| H44 | -3.1527592488 | 0.2961640680  | -3.3140037308 |
| H45 | -3.8257960370 | 1.8607298326  | -2.8584412790 |
| H46 | -2.4504551217 | 1.8878410291  | -0.7780002848 |
| H47 | -1.4332806488 | 1.6930602093  | -2.2124307598 |
| H48 | -1.3709149156 | -0.7632707715 | -1.8203292552 |
| H49 | -2.3622445740 | -1.7418826971 | 0.2799350623  |
| H50 | -2.9984152070 | -0.1599046600 | 0.6931554921  |
| H51 | -3.7297439217 | -1.8115199894 | -1.8040972854 |
| H52 | -4.7534030919 | -1.5670512589 | -0.3893992631 |
| H53 | -4.8927243722 | 0.8614947208  | -0.8524476868 |
| H54 | -5.3912777886 | -0.0314421562 | -2.2916551464 |

Conformer D,  $\tau_1$

|     |               |               |               |
|-----|---------------|---------------|---------------|
| Pd1 | -0.0468355899 | 0.1607319399  | 2.4072383678  |
| Cl2 | 0.2575423411  | 0.2783741142  | 4.7665048826  |
| Cl3 | 2.2973387590  | 0.5983434321  | 2.0834810804  |
| Cl4 | -2.3704210870 | -0.2473666695 | 2.7521872161  |
| P1  | -0.1941180496 | 0.0854621019  | 0.0593306396  |
| C4  | 1.7743801852  | 3.4230033296  | -1.8094258922 |
| C5  | 1.6172599298  | 2.0317513520  | -1.1661206601 |
| C6  | 0.1560296247  | 1.7810858834  | -0.7321739421 |
| C7  | -0.3014345208 | 2.9073655143  | 0.2263219152  |
| C8  | -0.1472729137 | 4.2967335583  | -0.4159506865 |
| C9  | 1.2970641830  | 4.5448736470  | -0.8753873089 |
| H10 | 1.1935669727  | 3.4604322505  | -2.7452036451 |
| H11 | 2.8253165159  | 3.5803437864  | -2.0892628552 |
| H12 | 1.9474915800  | 1.2720970880  | -1.8841805964 |
| H13 | 2.2672049397  | 1.9496921397  | -0.2874055197 |
| H14 | -0.4709741351 | 1.8170781846  | -1.6373359821 |
| H15 | -1.3385907459 | 2.7525167978  | 0.5421202877  |
| H16 | 0.3049937501  | 2.8495054638  | 1.1386154062  |
| H17 | -0.8238229185 | 4.3812680936  | -1.2817323511 |

|     |               |               |               |
|-----|---------------|---------------|---------------|
| H18 | -0.4585234859 | 5.0693658711  | 0.2996620627  |
| H19 | 1.9524502288  | 4.5813784755  | 0.0064633542  |
| H20 | 1.3816708698  | 5.5203565624  | -1.3750348659 |
| C21 | 2.1736002889  | -2.2160097492 | -2.6655527498 |
| C22 | 0.9633309617  | -1.4058214613 | -2.1622914834 |
| C23 | 1.1043695054  | -1.0818223414 | -0.6600900230 |
| C24 | 1.2751866746  | -2.3762308655 | 0.1677511622  |
| C25 | 2.4811533042  | -3.1865741625 | -0.3408269275 |
| C26 | 2.3737084669  | -3.4984945855 | -1.8424234802 |
| H27 | 3.0783606979  | -1.5940212362 | -2.5931468053 |
| H28 | 2.0446522430  | -2.4595914544 | -3.7297781551 |
| H29 | 0.0509020131  | -1.9934479220 | -2.3345104629 |
| H30 | 0.8589645753  | -0.4889369701 | -2.7568552695 |
| H31 | 2.0274468175  | -0.5093443666 | -0.5097059326 |
| H32 | 1.4139025976  | -2.1158385457 | 1.2212100742  |
| H33 | 0.3709855299  | -2.9965190428 | 0.1049862745  |
| H34 | 3.3997355817  | -2.6120851450 | -0.1519855265 |
| H35 | 2.5718459639  | -4.1177394334 | 0.2343377681  |
| H36 | 1.5183079708  | -4.1705606568 | -2.0130580475 |
| H37 | 3.2671180415  | -4.0361676313 | -2.1896438825 |
| C38 | -4.1928187484 | 0.2544776260  | -1.4239462032 |
| C39 | -2.9248766959 | 0.6527928621  | -0.6461763852 |
| C40 | -1.7964090119 | -0.3887674121 | -0.8320253225 |
| C41 | -2.2931229844 | -1.8029583295 | -0.4560927375 |
| C42 | -3.5676398675 | -2.1835868822 | -1.2313373502 |
| C43 | -4.6825234367 | -1.1470408258 | -1.0323650930 |
| H44 | -3.9843237071 | 0.2747927896  | -2.5061411978 |
| H45 | -4.9802935743 | 0.9991637992  | -1.2441482391 |
| H46 | -3.1546164698 | 0.7369006145  | 0.4215284435  |
| H47 | -2.5957971004 | 1.6404474595  | -0.9898174199 |
| H48 | -1.5240889788 | -0.3936179855 | -1.9003101151 |
| H49 | -1.5164046545 | -2.5485277713 | -0.6592231542 |
| H50 | -2.4914974728 | -1.8285462688 | 0.6210374376  |
| H51 | -3.3366075556 | -2.2635581351 | -2.3061457080 |
| H52 | -3.9074739178 | -3.1778963588 | -0.9107495568 |
| H53 | -4.9845233864 | -1.1410615969 | 0.0241164558  |
| H54 | -5.5711840737 | -1.4210680881 | -1.6186431357 |

Conformer D,  $\tau_2$

|     |               |               |               |
|-----|---------------|---------------|---------------|
| Pd1 | -0.0501381643 | 0.1644832961  | 2.4221421648  |
| Cl2 | 0.2617270192  | 0.2839515188  | 4.7818053489  |
| Cl3 | -2.3456507582 | -0.3731776651 | 2.7768563133  |
| Cl4 | 2.2721196695  | 0.6982845572  | 2.0829960704  |
| P1  | -0.2050004962 | 0.0895866229  | 0.0749352666  |
| C4  | 1.6911491074  | 3.4446499357  | -1.8450512376 |
| C5  | 1.5637647345  | 2.0536924808  | -1.1943781548 |
| C6  | 0.1150437796  | 1.7884755139  | -0.7270591512 |
| C7  | -0.3312465483 | 2.9138548387  | 0.2362479264  |
| C8  | -0.2098346622 | 4.3024952041  | -0.4141307538 |
| C9  | 1.2215185267  | 4.5649816960  | -0.9050295507 |
| H10 | 1.0895883695  | 3.4717166429  | -2.7679458846 |
| H11 | 2.7338768346  | 3.6131044455  | -2.1482985794 |
| H12 | 1.8870491846  | 1.2960216557  | -1.9175878990 |
| H13 | 2.2326194415  | 1.9813567064  | -0.3291853409 |
| H14 | -0.5308994027 | 1.8162921993  | -1.6190843887 |
| H15 | -1.3572266396 | 2.7461638624  | 0.5797369699  |
| H16 | 0.3002365064  | 2.8677835871  | 1.1317614702  |



|     |               |               |               |
|-----|---------------|---------------|---------------|
| H17 | -0.9085345351 | 4.3765669567  | -1.2633201273 |
| H18 | -0.5116620398 | 5.0742463004  | 0.3065247900  |
| H19 | 1.8951412833  | 4.6124455432  | -0.0375149655 |
| H20 | 1.2845158656  | 5.5392721751  | -1.4101618577 |
| C21 | 2.1891365820  | -2.1850350887 | -2.6501440453 |
| C22 | 0.9681232426  | -1.3928682684 | -2.1442048425 |
| C23 | 1.1127253667  | -1.0552507920 | -0.6450978194 |
| C24 | 1.3157923182  | -2.3391687228 | 0.1914840367  |
| C25 | 2.5321337670  | -3.1315849899 | -0.3210189772 |
| C26 | 2.4178159725  | -3.4574741916 | -1.8191529260 |
| H27 | 3.0830897172  | -1.5465401631 | -2.5885406494 |
| H28 | 2.0572008002  | -2.4388800035 | -3.7116103223 |
| H29 | 0.0653538152  | -1.9978592415 | -2.3058733712 |
| H30 | 0.8432260289  | -0.4823078564 | -2.7442872762 |
| H31 | 2.0249944849  | -0.4637766180 | -0.5030825321 |
| H32 | 1.4588074162  | -2.0669155239 | 1.2413894032  |
| H33 | 0.4226731299  | -2.9765988441 | 0.1431347744  |
| H34 | 3.4419445112  | -2.5395497224 | -0.1443174627 |
| H35 | 2.6441798242  | -4.0564960584 | 0.2604960937  |
| H36 | 1.5723610973  | -4.1450218708 | -1.9773140483 |
| H37 | 3.3171632386  | -3.9828539076 | -2.1698575158 |
| C38 | -4.2091422510 | 0.1894386692  | -1.3906687738 |
| C39 | -2.9525079196 | 0.5953146711  | -0.5993784886 |
| C40 | -1.7998206729 | -0.4126651609 | -0.8152433821 |
| C41 | -2.2631665449 | -1.8464735927 | -0.4713810898 |
| C42 | -3.5235539877 | -2.2377964870 | -1.2638311514 |
| C43 | -4.6639050771 | -1.2345151121 | -1.0421495489 |
| H44 | -4.0003320183 | 0.2473103697  | -2.4714235225 |
| H45 | -5.0155376329 | 0.9080821611  | -1.1899067521 |
| H46 | -3.1838699224 | 0.6397350615  | 0.4704987909  |
| H47 | -2.6483628895 | 1.6012676348  | -0.9104960305 |
| H48 | -1.5346802290 | -0.3853800941 | -1.8850511746 |
| H49 | -1.4685705000 | -2.5690804145 | -0.6878396380 |
| H50 | -2.4649155301 | -1.9003279004 | 0.6039723611  |
| H51 | -3.2858120177 | -2.2844920288 | -2.3392439296 |
| H52 | -3.8417658147 | -3.2477052047 | -0.9709757924 |
| H53 | -4.9701515534 | -1.2660298999 | 0.0126751102  |
| H54 | -5.5435878606 | -1.5137366268 | -1.6395822575 |

#### Conformer D, $\tau_3$

|     |               |               |               |
|-----|---------------|---------------|---------------|
| Pd1 | -0.0567793036 | 0.1354558407  | 2.4087730523  |
| Cl2 | 0.2522707815  | 0.2134338713  | 4.7701341842  |
| Cl3 | -2.3909423319 | -0.2225452994 | 2.7430619217  |
| Cl4 | 2.2928139120  | 0.5468475629  | 2.0836609145  |
| P1  | -0.2045587145 | 0.0677410760  | 0.0616671337  |
| C4  | 1.8314536245  | 3.3628386522  | -1.8086164772 |
| C5  | 1.6458512660  | 1.9764381211  | -1.1625009175 |
| C6  | 0.1782990595  | 1.7535581015  | -0.7348423633 |
| C7  | -0.2647897262 | 2.8908348100  | 0.2174502964  |
| C8  | -0.0815895065 | 4.2754522246  | -0.4276847618 |
| C9  | 1.3695911954  | 4.4956945585  | -0.8800292225 |
| H10 | 1.2563772323  | 3.4084125075  | -2.7475989599 |
| H11 | 2.8865196227  | 3.5007122495  | -2.0832597627 |
| H12 | 1.9654024380  | 1.2085634533  | -1.8770626257 |
| H13 | 2.2899284064  | 1.8837341817  | -0.2805728705 |
| H14 | -0.4434327526 | 1.7977809029  | -1.6430658146 |
| H15 | -1.3063211940 | 2.7557594580  | 0.5279240150  |

|     |               |               |               |
|-----|---------------|---------------|---------------|
| H16 | 0.3354444427  | 2.8239996689  | 1.1332467347  |
| H17 | -0.7518484754 | 4.3701004405  | -1.2972995579 |
| H18 | -0.3822737552 | 5.0557949012  | 0.2841355965  |
| H19 | 2.0208609439  | 4.5225421434  | 0.0052246789  |
| H20 | 1.4747565600  | 5.4681581452  | -1.3817436412 |
| C21 | 2.1412305975  | -2.2717970009 | -2.6514778474 |
| C22 | 0.9390030136  | -1.4462961641 | -2.1539754363 |
| C23 | 1.0789554970  | -1.1207149943 | -0.6521851549 |
| C24 | 1.2326556548  | -2.4141804577 | 0.1800428753  |
| C25 | 2.4304011307  | -3.2399933206 | -0.3231952943 |
| C26 | 2.3233085140  | -3.5545425301 | -1.8243161714 |
| H27 | 3.0530442903  | -1.6603599230 | -2.5775612486 |
| H28 | 2.0128693152  | -2.5164960201 | -3.7155272775 |
| H29 | 0.0205412040  | -2.0239908493 | -2.3279898406 |
| H30 | 0.8474077262  | -0.5293450765 | -2.7507419993 |
| H31 | 2.0089334023  | -0.5599286422 | -0.5004015053 |
| H32 | 1.3723803155  | -2.1524034069 | 1.2329457254  |
| H33 | 0.3216402110  | -3.0242821377 | 0.1177217595  |
| H34 | 3.3550988458  | -2.6756450108 | -0.1336552473 |
| H35 | 2.5087853986  | -4.1705127482 | 0.2547946600  |
| H36 | 1.4603352129  | -4.2166406370 | -1.9958014443 |
| H37 | 3.2111665428  | -4.1039782675 | -2.1673460631 |
| C38 | -4.1972596111 | 0.2929240435  | -1.4320314843 |
| C39 | -2.9273318141 | 0.6723306199  | -0.6481855997 |
| C40 | -1.8119723280 | -0.3830804103 | -0.8330582805 |
| C41 | -2.3291084812 | -1.7912669752 | -0.4605097776 |
| C42 | -3.6051539187 | -2.1533738740 | -1.2423648237 |
| C43 | -4.7072000408 | -1.1027393229 | -1.0460973407 |
| H44 | -3.9837884030 | 0.3129960699  | -2.5132753626 |
| H45 | -4.9756490753 | 1.0475177055  | -1.2537838295 |
| H46 | -3.1595887887 | 0.7545092235  | 0.4191828866  |
| H47 | -2.5848727142 | 1.6570385856  | -0.9870219447 |
| H48 | -1.5375035493 | -0.3888934019 | -1.9006961098 |
| H49 | -1.5613827556 | -2.5465779098 | -0.6620901185 |
| H50 | -2.5315270318 | -1.8149796749 | 0.6159374005  |
| H51 | -3.3705621744 | -2.2343490270 | -2.3163719398 |
| H52 | -3.9599329104 | -3.1436022043 | -0.9253239253 |
| H53 | -5.0135013536 | -1.0954133797 | 0.0091311084  |
| H54 | -5.5969674636 | -1.3634264631 | -1.6368504157 |

#### Conformer E, $\tau_1$

|     |               |               |               |
|-----|---------------|---------------|---------------|
| Pd1 | -0.3114693764 | 0.1491062542  | 2.3825710954  |
| Cl2 | -0.8821795907 | 0.1786260642  | 4.6956223583  |
| Cl3 | 1.9996834644  | 0.0673746815  | 2.9630546729  |
| Cl4 | -2.6496686954 | 0.2295475213  | 1.7887570064  |
| P1  | 0.0741591358  | 0.1196507326  | 0.0628361042  |
| C4  | 3.9627800268  | -1.2725353663 | -0.9696426683 |
| C5  | 2.5703957464  | -1.2319064128 | -0.3134755006 |
| C6  | 1.8052824249  | 0.0593139311  | -0.6878082052 |
| C7  | 2.6499041524  | 1.3035535879  | -0.3247599732 |
| C8  | 4.0417687798  | 1.2517015075  | -0.9810461729 |
| C9  | 4.7954326526  | -0.0336255783 | -0.6103106590 |
| H10 | 3.8536263404  | -1.3295486670 | -2.0650497849 |
| H11 | 4.4864180948  | -2.1875435047 | -0.6604145881 |
| H12 | 2.0055144558  | -2.1182602371 | -0.6216597433 |
| H13 | 2.6698978552  | -1.2747046692 | 0.7767953034  |
| H14 | 1.6494357665  | 0.0588555898  | -1.7787227471 |

|     |               |               |               |
|-----|---------------|---------------|---------------|
| H15 | 2.1410598636  | 2.2209505525  | -0.6395643803 |
| H16 | 2.7525699095  | 1.3487593397  | 0.7651200528  |
| H17 | 3.9360503917  | 1.3055598777  | -2.0769354225 |
| H18 | 4.6216507766  | 2.1348935951  | -0.6798623439 |
| H19 | 4.9940667098  | -0.0349400009 | 0.4703766728  |
| H20 | 5.7710470073  | -0.0665191413 | -1.1160603037 |
| C21 | -1.7162327242 | -3.7130104198 | -0.2612065921 |
| C22 | -0.7820034153 | -2.5982703670 | 0.2393166688  |
| C23 | -0.8583997362 | -1.3548412621 | -0.6788922858 |
| C24 | -0.5446416043 | -1.7383975491 | -2.1413262154 |
| C25 | -1.4814103762 | -2.8591435127 | -2.6339259936 |
| C26 | -1.4228098799 | -4.0924454073 | -1.7206428659 |
| H27 | -2.7577106719 | -3.3705520206 | -0.1747415983 |
| H28 | -1.6222538284 | -4.5939328386 | 0.3878335853  |
| H29 | 0.2471571772  | -2.9804780684 | 0.2786416927  |
| H30 | -1.0527349511 | -2.3112987108 | 1.2597267768  |
| H31 | -1.8962814550 | -1.0000214046 | -0.6261828394 |
| H32 | -0.6413877985 | -0.8741255469 | -2.8071287737 |
| H33 | 0.4948355324  | -2.0839687480 | -2.2272105295 |
| H34 | -2.5132267042 | -2.4777608671 | -2.6597344825 |
| H35 | -1.2222568606 | -3.1326191320 | -3.6667540706 |
| H36 | -0.4187601757 | -4.5400833456 | -1.7847383659 |
| H37 | -2.1288742013 | -4.8582950095 | -2.0712919313 |
| C38 | -1.2871088825 | 3.1296284087  | -2.7051246525 |
| C39 | -0.4179591566 | 1.9687447836  | -2.1818696135 |
| C40 | -0.7661308947 | 1.6312193542  | -0.7156429825 |
| C41 | -0.6255474616 | 2.8867898597  | 0.1781577355  |
| C42 | -1.4913663157 | 4.0424984386  | -0.3520859801 |
| C43 | -1.1672601476 | 4.3766874847  | -1.8163473590 |
| H44 | -2.3383043054 | 2.8054665446  | -2.7324832998 |
| H45 | -1.0051859659 | 3.3667767283  | -3.7409619962 |
| H46 | 0.6395322242  | 2.2556999542  | -2.2626691249 |
| H47 | -0.5545061626 | 1.0986978909  | -2.8330612228 |
| H48 | -1.8232554618 | 1.3381608156  | -0.6668058151 |
| H49 | -0.9198399521 | 2.6370099534  | 1.2017080640  |
| H50 | 0.4236755520  | 3.2099950429  | 0.2179144022  |
| H51 | -2.5509978077 | 3.7604591870  | -0.2674645698 |
| H52 | -1.3528933908 | 4.9291548699  | 0.2809370594  |
| H53 | -0.1397653433 | 4.7671982862  | -1.8812274644 |
| H54 | -1.8282305250 | 5.1724766608  | -2.1875539511 |

#### Conformer E, $\tau_2$

|     |               |               |               |
|-----|---------------|---------------|---------------|
| Pd1 | -0.3022762449 | 0.1431643225  | 2.3759942718  |
| Cl2 | -0.8689923743 | 0.1595712214  | 4.6895496717  |
| Cl3 | -2.6417632079 | 0.0931482390  | 1.7845996254  |
| Cl4 | 2.0084412174  | 0.2623744617  | 2.9511165612  |
| P1  | 0.0800652012  | 0.1102625848  | 0.0545721691  |
| C4  | 3.9897553507  | -1.2426267355 | -0.9203182440 |
| C5  | 2.6000516777  | -1.1880994374 | -0.2605604829 |
| C6  | 1.8115846144  | 0.0692446954  | -0.6991939155 |
| C7  | 2.6353519011  | 1.3448065267  | -0.4066023818 |
| C8  | 4.0277026745  | 1.2786246700  | -1.0618091183 |
| C9  | 4.8028275699  | 0.0264510288  | -0.6275149310 |
| H10 | 3.8784994935  | -1.3578629514 | -2.0109208036 |
| H11 | 4.5289078659  | -2.1318371890 | -0.5659534322 |
| H12 | 2.0468218950  | -2.0992678126 | -0.5134949308 |
| H13 | 2.7058974211  | -1.1684911217 | 0.8297495475  |

|     |               |               |               |
|-----|---------------|---------------|---------------|
| H14 | 1.6535540499  | 0.0117875066  | -1.7880096644 |
| H15 | 2.1123362653  | 2.2337347576  | -0.7749860543 |
| H16 | 2.7376129803  | 1.4544234135  | 0.6786512252  |
| H17 | 3.9190794237  | 1.2734553983  | -2.1587429012 |
| H18 | 4.5943672385  | 2.1853331842  | -0.8091289793 |
| H19 | 5.0036355254  | 0.0834282340  | 0.4512757322  |
| H20 | 5.7778120330  | -0.0160630350 | -1.1337259843 |
| C21 | -1.7176250887 | -3.7187473597 | -0.3173770969 |
| C22 | -0.7998219831 | -2.6058849481 | 0.2168747837  |
| C23 | -0.8223286007 | -1.3717389788 | -0.7165994277 |
| C24 | -0.4287066464 | -1.7796254957 | -2.1535678271 |
| C25 | -1.3548767451 | -2.8912037984 | -2.6846928210 |
| C26 | -1.3598112465 | -4.1157722139 | -1.7575955679 |
| H27 | -2.7588103223 | -3.3663834933 | -0.2826001925 |
| H28 | -1.6624603069 | -4.5940639603 | 0.3435617966  |
| H29 | 0.2248290824  | -2.9928719694 | 0.3078687470  |
| H30 | -1.1181521384 | -2.3061821066 | 1.2190435976  |
| H31 | -1.8607508039 | -1.0153303535 | -0.7304840973 |
| H32 | -0.4647789857 | -0.9248104952 | -2.8373119195 |
| H33 | 0.6065072948  | -2.1468508687 | -2.1695825050 |
| H34 | -2.3784334427 | -2.4960234605 | -2.7686659995 |
| H35 | -1.0458399528 | -3.1791478759 | -3.6997498377 |
| H36 | -0.3605344948 | -4.5781618473 | -1.7688873319 |
| H37 | -2.0591797515 | -4.8749555227 | -2.1351396437 |
| C38 | -1.4123750857 | 3.0843977495  | -2.6801242233 |
| C39 | -0.5300160545 | 1.9204426546  | -2.1870990526 |
| C40 | -0.7963906050 | 1.6097673605  | -0.6989663404 |
| C41 | -0.6143490297 | 2.8755304430  | 0.1730740775  |
| C42 | -1.5002970327 | 4.0270746132  | -0.3317640183 |
| C43 | -1.2388169045 | 4.3398534149  | -1.8129354849 |
| H44 | -2.4664756341 | 2.7701355199  | -2.6519363014 |
| H45 | -1.1795949626 | 3.3070626366  | -3.7312614368 |
| H46 | 0.5255413841  | 2.1875413511  | -2.3359365337 |
| H47 | -0.7214411409 | 1.0414077908  | -2.8117797693 |
| H48 | -1.8479360611 | 1.3120389672  | -0.5895753654 |
| H49 | -0.8629672763 | 2.6359141062  | 1.2117451047  |
| H50 | 0.4348079314  | 3.1996983016  | 0.1656768238  |
| H51 | -2.5563744598 | 3.7507641800  | -0.1980474661 |
| H52 | -1.3309370040 | 4.9214366323  | 0.2826003380  |
| H53 | -0.2113034125 | 4.7186722082  | -1.9283815823 |
| H54 | -1.9072198006 | 5.1385795166  | -2.1639143641 |

#### Conformer E, $\tau_3$

|     |               |               |               |
|-----|---------------|---------------|---------------|
| Pd1 | -0.2637242763 | 0.1875268085  | 2.4336294604  |
| Cl2 | -0.8086942466 | 0.1075779325  | 4.7495263382  |
| Cl3 | -2.5685163515 | 0.6443517899  | 1.9222610120  |
| Cl4 | 1.9902825629  | -0.3932231002 | 2.9552456637  |
| P1  | 0.0788295431  | 0.1832650432  | 0.0880681690  |
| C4  | 3.9429785895  | -1.2112347260 | -1.1398621869 |
| C5  | 2.5435387534  | -1.2462607575 | -0.4949367262 |
| C6  | 1.8149245436  | 0.1048149691  | -0.6639429666 |
| C7  | 2.6870315622  | 1.2644086331  | -0.1191433336 |
| C8  | 4.0808651437  | 1.2829779056  | -0.7693733373 |
| C9  | 4.7989710092  | -0.0621517976 | -0.5889447737 |
| H10 | 3.8429667345  | -1.0937905295 | -2.2315091066 |
| H11 | 4.4457316313  | -2.1742385510 | -0.9756031823 |
| H12 | 1.9614541589  | -2.0496892772 | -0.9599041147 |

|     |               |               |               |
|-----|---------------|---------------|---------------|
| H13 | 2.6266341000  | -1.4766010064 | 0.5722070861  |
| H14 | 1.6725599489  | 0.2626107171  | -1.7437443666 |
| H15 | 2.1953065386  | 2.2288356151  | -0.2873323026 |
| H16 | 2.7880780587  | 1.1438200534  | 0.9652046993  |
| H17 | 3.9874016647  | 1.5034435725  | -1.8452698318 |
| H18 | 4.6775870888  | 2.0962061270  | -0.3340747647 |
| H19 | 4.9822099284  | -0.2304961898 | 0.4813521915  |
| H20 | 5.7803363663  | -0.0441545860 | -1.0841330756 |
| C21 | -1.6495829155 | -3.6974686409 | -0.1869363913 |
| C22 | -0.6628919130 | -2.5941594825 | 0.2362755891  |
| C23 | -0.9155717197 | -1.2915073052 | -0.5607868782 |
| C24 | -0.8551723605 | -1.5516947033 | -2.0810176780 |
| C25 | -1.8298910432 | -2.6724185941 | -2.4951149456 |
| C26 | -1.5898249723 | -3.9627126009 | -1.6986864715 |
| H27 | -2.6698225018 | -3.3952420506 | 0.0911188094  |
| H28 | -1.4349566460 | -4.6204679917 | 0.3680607810  |
| H29 | 0.3618178064  | -2.9518605523 | 0.0792187562  |
| H30 | -0.7625941553 | -2.3887810104 | 1.3074306035  |
| H31 | -1.9324181530 | -0.9670764906 | -0.2995030222 |
| H32 | -1.1027975206 | -0.6429607390 | -2.6409330045 |
| H33 | 0.1659048485  | -1.8366444454 | -2.3742086633 |
| H34 | -2.8608446744 | -2.3292939119 | -2.3225965841 |
| H35 | -1.7406891206 | -2.8656356254 | -3.5738203452 |
| H36 | -0.5989396943 | -4.3677898097 | -1.9570173564 |
| H37 | -2.3244345993 | -4.7277191858 | -1.9871313324 |
| C38 | -1.0294044238 | 3.1382782737  | -2.8668738642 |
| C39 | -0.1761583231 | 2.0284086620  | -2.2191865163 |
| C40 | -0.7231533882 | 1.6614037671  | -0.8214113362 |
| C41 | -0.7755040695 | 2.9162833455  | 0.0785459037  |
| C42 | -1.6003594504 | 4.0403084494  | -0.5765690887 |
| C43 | -1.0929562022 | 4.3918595579  | -1.9832808061 |
| H44 | -2.0490613215 | 2.7587469589  | -3.0329480095 |
| H45 | -0.6224826937 | 3.3892261817  | -3.8567195154 |
| H46 | 0.8580748114  | 2.3886075288  | -2.1383094176 |
| H47 | -0.1510091348 | 1.1560960721  | -2.8820330268 |
| H48 | -1.7628554605 | 1.3277587379  | -0.9430083657 |
| H49 | -1.2568051080 | 2.6779850605  | 1.0439751479  |
| H50 | 0.2396842621  | 3.2817168759  | 0.2858443911  |
| H51 | -2.6503245763 | 3.7184059724  | -0.6412631472 |
| H52 | -1.5891734037 | 4.9332985809  | 0.0623811167  |
| H53 | -0.0850418043 | 4.8279784925  | -1.9045033122 |
| H54 | -1.7294749971 | 5.1554974837  | -2.4526773528 |

#### Conformer F, $\tau_1$

|     |               |               |               |
|-----|---------------|---------------|---------------|
| Pd1 | -0.0420110260 | 0.1077329135  | 2.4274465275  |
| Cl2 | -0.0566077282 | 0.2870336599  | 4.8037115421  |
| Cl3 | 2.1159202988  | -0.9206078094 | 2.5232520962  |
| Cl4 | -2.1486937793 | 1.2568298872  | 2.3326166839  |
| P1  | -0.0468609356 | -0.0216932237 | 0.0801888057  |
| C4  | 2.6295617034  | 3.1484888258  | -0.7557516215 |
| C5  | 2.0490711317  | 1.8524709730  | -0.1639836045 |
| C6  | 0.6187843408  | 1.5721745259  | -0.6822784218 |
| C7  | -0.2982085286 | 2.7870704979  | -0.4177210163 |
| C8  | 0.2947974809  | 4.0790945792  | -1.0079545988 |
| C9  | 1.7129126737  | 4.3501267646  | -0.4857733861 |
| H10 | 2.7617214152  | 3.0312947098  | -1.8434792930 |
| H11 | 3.6292600718  | 3.3264535767  | -0.3371879994 |

|     |               |               |               |
|-----|---------------|---------------|---------------|
| H12 | 2.7158941698  | 1.0131083478  | -0.3922849963 |
| H13 | 2.0212671208  | 1.9234726017  | 0.9306269252  |
| H14 | 0.6699224792  | 1.4182220396  | -1.7710834006 |
| H15 | -1.2923929178 | 2.6193635107  | -0.8478973676 |
| H16 | -0.4519037886 | 2.8998236939  | 0.6616330098  |
| H17 | 0.3251836836  | 4.0015765116  | -2.1069477662 |
| H18 | -0.3665670451 | 4.9241614733  | -0.7736383597 |
| H19 | 1.6696639613  | 4.5336804317  | 0.5974105800  |
| H20 | 2.1241786782  | 5.2597839029  | -0.9458364201 |
| C21 | 2.6129104194  | -2.3014808441 | -2.4083527366 |
| C22 | 1.5127170069  | -1.2672697887 | -2.0951698767 |
| C23 | 1.1029617244  | -1.3490900346 | -0.6091202643 |
| C24 | 0.6344827538  | -2.7762396373 | -0.2517726383 |
| C25 | 1.7356469875  | -3.8046821845 | -0.5629619009 |
| C26 | 2.1817199797  | -3.7278880736 | -2.0317750715 |
| H27 | 3.5201867180  | -2.0388328410 | -1.8447471253 |
| H28 | 2.8787182677  | -2.2504291221 | -3.4738828946 |
| H29 | 0.6499865404  | -1.4588480644 | -2.7462779469 |
| H30 | 1.8805286014  | -0.2660858566 | -2.3481076002 |
| H31 | 1.9980869818  | -1.1712645862 | 0.0005745711  |
| H32 | 0.3735166472  | -2.8232966966 | 0.8105336985  |
| H33 | -0.2645989537 | -3.0341182510 | -0.8290585734 |
| H34 | 2.5934319612  | -3.6114282256 | 0.0959021863  |
| H35 | 1.3782294978  | -4.8163147262 | -0.3264251500 |
| H36 | 1.3459767155  | -4.0339225679 | -2.6808464368 |
| H37 | 3.0006894305  | -4.4351035215 | -2.2238818496 |
| C38 | -4.0618865802 | -1.2648939297 | -0.4642664512 |
| C39 | -2.5925544212 | -1.3465827084 | -0.0150380465 |
| C40 | -1.7712673689 | -0.2058929854 | -0.6563520979 |
| C41 | -1.8769876037 | -0.2571248101 | -2.1943780531 |
| C42 | -3.3493796222 | -0.1719576299 | -2.6416042137 |
| C43 | -4.1981477438 | -1.2787310049 | -1.9954639993 |
| H44 | -4.5008046035 | -0.3400808583 | -0.0637504839 |
| H45 | -4.6312844854 | -2.0958737287 | -0.0261976810 |
| H46 | -2.1828860126 | -2.3239352224 | -0.3021666291 |
| H47 | -2.5326467568 | -1.2662431880 | 1.0740895991  |
| H48 | -2.2435398831 | 0.7206318219  | -0.3066042779 |
| H49 | -1.3026558362 | 0.5541056548  | -2.6594828405 |
| H50 | -1.4523534048 | -1.1992812960 | -2.5668600770 |
| H51 | -3.7549664899 | 0.8098551177  | -2.3554597165 |
| H52 | -3.4121776421 | -0.2307964391 | -3.7376049582 |
| H53 | -3.8655250054 | -2.2555035609 | -2.3806111957 |
| H54 | -5.2515081931 | -1.1700138255 | -2.2896009446 |

#### Conformer F, $\tau_2$

|     |               |               |               |
|-----|---------------|---------------|---------------|
| Pd1 | -0.1199858544 | 0.1659032772  | 2.3765413413  |
| Cl2 | -0.0979698019 | 0.3800784459  | 4.7491742699  |
| Cl3 | 1.9650296156  | -1.0080510215 | 2.4796048986  |
| Cl4 | -2.1503251245 | 1.4361760357  | 2.2811362505  |
| P1  | -0.1217187697 | 0.0381323357  | 0.0275426971  |
| C4  | 2.6522171264  | 3.1292790144  | -0.7692144503 |
| C5  | 2.0167861309  | 1.8662535483  | -0.1624423855 |
| C6  | 0.6018717861  | 1.6073328557  | -0.7314974152 |
| C7  | -0.2945665609 | 2.8485817965  | -0.5288823381 |
| C8  | 0.3511142922  | 4.1097163676  | -1.1317630654 |
| C9  | 1.7574268110  | 4.3609912745  | -0.5690012308 |
| H10 | 2.8205436216  | 2.9760212387  | -1.8474633343 |

|     |               |               |               |
|-----|---------------|---------------|---------------|
| H11 | 3.6401838396  | 3.2959227808  | -0.3194865564 |
| H12 | 2.6705668013  | 1.0037776839  | -0.3349431029 |
| H13 | 1.9435939074  | 1.9736612964  | 0.9272896592  |
| H14 | 0.6911127189  | 1.4332580409  | -1.8147368086 |
| H15 | -1.2758831132 | 2.6935179754  | -0.9923626086 |
| H16 | -0.4838898853 | 2.9924687151  | 0.5412127151  |
| H17 | 0.4163513439  | 4.0006181575  | -2.2265796395 |
| H18 | -0.2960756578 | 4.9771940064  | -0.9438379756 |
| H19 | 1.6820757435  | 4.5803585344  | 0.5057078510  |
| H20 | 2.2072836910  | 5.2451101073  | -1.0426023932 |
| C21 | 2.4619358231  | -2.3263916456 | -2.4645203428 |
| C22 | 1.3976115457  | -1.2550459064 | -2.1517643099 |
| C23 | 0.9819111715  | -1.3258083458 | -0.6662316636 |
| C24 | 0.4622185094  | -2.7370880781 | -0.3148057254 |
| C25 | 1.5293162880  | -3.8013139116 | -0.6239952531 |
| C26 | 1.9822244212  | -3.7375899759 | -2.0910534317 |
| H27 | 3.3766907474  | -2.0953748490 | -1.8990497389 |
| H28 | 2.7314280538  | -2.2832289301 | -3.5295126852 |
| H29 | 0.5297434774  | -1.4144782086 | -2.8049223347 |
| H30 | 1.8023001757  | -0.2679174370 | -2.4026606178 |
| H31 | 1.8822341493  | -1.1840473294 | -0.0550373303 |
| H32 | 0.1963442248  | -2.7774136589 | 0.7462226635  |
| H33 | -0.4428147676 | -2.9605677450 | -0.8972427656 |
| H34 | 2.3902840430  | -3.6373585018 | 0.0385945698  |
| H35 | 1.1384358290  | -4.8012920180 | -0.3908628622 |
| H36 | 1.1388420908  | -4.0149389266 | -2.7431641173 |
| H37 | 2.7781981588  | -4.4709200603 | -2.2816103721 |
| C38 | -4.1809125999 | -1.0504121859 | -0.5206221802 |
| C39 | -2.7158243885 | -1.1881182970 | -0.0709444156 |
| C40 | -1.8508046632 | -0.0784480255 | -0.7101860209 |
| C41 | -1.9588370147 | -0.1215591122 | -2.2484889816 |
| C42 | -3.4269086054 | 0.0184119789  | -2.6958431647 |
| C43 | -4.3163323934 | -1.0570543180 | -2.0519441187 |
| H44 | -4.5843386233 | -0.1101695890 | -0.1188963290 |
| H45 | -4.7820336407 | -1.8597791791 | -0.0843769804 |
| H46 | -2.3429982003 | -2.1798339944 | -0.3596477632 |
| H47 | -2.6531015389 | -1.1143222791 | 1.0185179925  |
| H48 | -2.2858246679 | 0.8653127863  | -0.3572445986 |
| H49 | -1.3547215534 | 0.6688998325  | -2.7117191417 |
| H50 | -1.5681646008 | -1.0776302249 | -2.6227068173 |
| H51 | -3.7961376777 | 1.0140950407  | -2.4083540146 |
| H52 | -3.4916795525 | -0.0366268527 | -3.7919267833 |
| H53 | -4.0197845751 | -2.0450698228 | -2.4379734575 |
| H54 | -5.3646381171 | -0.9089400829 | -2.3468825071 |

#### Conformer F, $\tau_3$

|     |               |               |               |
|-----|---------------|---------------|---------------|
| Pd1 | -0.1175973952 | 0.1723037657  | 2.3761720803  |
| Cl2 | -0.1330441251 | 0.3466409277  | 4.7533467691  |
| Cl3 | -2.2183062338 | 1.3265462011  | 2.2877336814  |
| Cl4 | 2.0375631711  | -0.8647473895 | 2.4785821477  |
| P1  | -0.1110380582 | 0.0371527664  | 0.0282764297  |
| C4  | 2.6127912452  | 3.1624579058  | -0.8269004647 |
| C5  | 2.0212219185  | 1.8732905612  | -0.2300633886 |
| C6  | 0.5809633253  | 1.6192589150  | -0.7324217597 |
| C7  | -0.3139170631 | 2.8478459057  | -0.4514187769 |
| C8  | 0.2893253953  | 4.1330029123  | -1.0467570872 |
| C9  | 1.7191865712  | 4.3787097987  | -0.5436398695 |

|     |               |               |               |
|-----|---------------|---------------|---------------|
| H10 | 2.7283764460  | 3.0448063576  | -1.9164691950 |
| H11 | 3.6206775432  | 3.3247721748  | -0.4219014873 |
| H12 | 2.6714997623  | 1.0247725226  | -0.4716809209 |
| H13 | 2.0089207154  | 1.9401294323  | 0.8649291254  |
| H14 | 0.6182110932  | 1.4701687153  | -1.8223824004 |
| H15 | -1.3172424064 | 2.6960731040  | -0.8658561026 |
| H16 | -0.4482839370 | 2.9601366138  | 0.6309423933  |
| H17 | 0.3023071092  | 4.0580293146  | -2.1461796877 |
| H18 | -0.3551092684 | 4.9876358160  | -0.8001743631 |
| H19 | 1.6931913455  | 4.5618527710  | 0.5401812382  |
| H20 | 2.1398653077  | 5.2817839849  | -1.0080687530 |
| C21 | 2.4949652128  | -2.2931833120 | -2.4668192754 |
| C22 | 1.3934271011  | -1.2608238878 | -2.1524030879 |
| C23 | 1.0225287390  | -1.3070593278 | -0.6546912591 |
| C24 | 0.5697701400  | -2.7280738037 | -0.2533343979 |
| C25 | 1.6720316452  | -3.7555279728 | -0.5637473471 |
| C26 | 2.0854265262  | -3.7128283980 | -2.0434446181 |
| H27 | 3.4135550997  | -2.0084198215 | -1.9329963328 |
| H28 | 2.7339867098  | -2.2677443662 | -3.5396202242 |
| H29 | 0.5146760253  | -1.4803782255 | -2.7730118818 |
| H30 | 1.7425809350  | -0.2632922941 | -2.4437493962 |
| H31 | 1.9318041780  | -1.1127382891 | -0.0718524835 |
| H32 | 0.3319903903  | -2.7513264043 | 0.8147258705  |
| H33 | -0.3388790855 | -3.0050827694 | -0.8060040485 |
| H34 | 2.5418907590  | -3.5394497063 | 0.0716962622  |
| H35 | 1.3283199155  | -4.7637921306 | -0.2948413662 |
| H36 | 1.2387234773  | -4.0429205442 | -2.6659775334 |
| H37 | 2.9066648604  | -4.4175088904 | -2.2352613372 |
| C38 | -4.1300818705 | -1.1692462281 | -0.5515578175 |
| C39 | -2.6570667751 | -1.2795330357 | -0.1208798080 |
| C40 | -1.8356311103 | -0.1129265771 | -0.7138248581 |
| C41 | -1.9517441849 | -0.0955585635 | -2.2519410522 |
| C42 | -3.4273219828 | 0.0176307780  | -2.6828730966 |
| C43 | -4.2786076198 | -1.1116909238 | -2.0805492239 |
| H44 | -4.5594243963 | -0.2618259905 | -0.1041404741 |
| H45 | -4.7003963664 | -2.0169380661 | -0.1478597560 |
| H46 | -2.2555126344 | -2.2426653885 | -0.4628586813 |
| H47 | -2.5867634943 | -1.2580075709 | 0.9704839839  |
| H48 | -2.3024484479 | 0.7991500196  | -0.3208246793 |
| H49 | -1.3771405633 | 0.7326880725  | -2.6852645110 |
| H50 | -1.5345739358 | -1.0217652704 | -2.6699372541 |
| H51 | -3.8245504244 | 0.9879980451  | -2.3499816366 |
| H52 | -3.4989904410 | 0.0080575521  | -3.7798739783 |
| H53 | -3.9560741700 | -2.0721777226 | -2.5125028174 |
| H54 | -5.3334669660 | -0.9825897712 | -2.3606963472 |

#### Conformer G, $\tau_1$

|     |               |               |               |
|-----|---------------|---------------|---------------|
| Pd1 | -0.1175973952 | 0.1723037657  | 2.3761720803  |
| Cl2 | -0.1330441251 | 0.3466409277  | 4.7533467691  |
| Cl3 | -2.2183062338 | 1.3265462011  | 2.2877336814  |
| Cl4 | 2.0375631711  | -0.8647473895 | 2.4785821477  |
| P1  | -0.1110380582 | 0.0371527664  | 0.0282764297  |
| C4  | 2.6127912452  | 3.1624579058  | -0.8269004647 |
| C5  | 2.0212219185  | 1.8732905612  | -0.2300633886 |
| C6  | 0.5809633253  | 1.6192589150  | -0.7324217597 |
| C7  | -0.3139170631 | 2.8478459057  | -0.4514187769 |
| C8  | 0.2893253953  | 4.1330029123  | -1.0467570872 |

|     |               |               |               |
|-----|---------------|---------------|---------------|
| C9  | 1.7191865712  | 4.3787097987  | -0.5436398695 |
| H10 | 2.7283764460  | 3.0448063576  | -1.9164691950 |
| H11 | 3.6206775432  | 3.3247721748  | -0.4219014873 |
| H12 | 2.6714997623  | 1.0247725226  | -0.4716809209 |
| H13 | 2.0089207154  | 1.9401294323  | 0.8649291254  |
| H14 | 0.6182110932  | 1.4701687153  | -1.8223824004 |
| H15 | -1.3172424064 | 2.6960731040  | -0.8658561026 |
| H16 | -0.4482839370 | 2.9601366138  | 0.6309423933  |
| H17 | 0.3023071092  | 4.0580293146  | -2.1461796877 |
| H18 | -0.3551092684 | 4.9876358160  | -0.8001743631 |
| H19 | 1.6931913455  | 4.5618527710  | 0.5401812382  |
| H20 | 2.1398653077  | 5.2817839849  | -1.0080687530 |
| C21 | 2.4949652128  | -2.2931833120 | -2.4668192754 |
| C22 | 1.3934271011  | -1.2608238878 | -2.1524030879 |
| C23 | 1.0225287390  | -1.3070593278 | -0.6546912591 |
| C24 | 0.5697701400  | -2.7280738037 | -0.2533343979 |
| C25 | 1.6720316452  | -3.7555279728 | -0.5637473471 |
| C26 | 2.0854265262  | -3.7128283980 | -2.0434446181 |
| H27 | 3.4135550997  | -2.0084198215 | -1.9329963328 |
| H28 | 2.7339867098  | -2.2677443662 | -3.5396202242 |
| H29 | 0.5146760253  | -1.4803782255 | -2.7730118818 |
| H30 | 1.7425809350  | -0.2632922941 | -2.4437493962 |
| H31 | 1.9318041780  | -1.1127382891 | -0.0718524835 |
| H32 | 0.3319903903  | -2.7513264043 | 0.8147258705  |
| H33 | -0.3388790855 | -3.0050827694 | -0.8060040485 |
| H34 | 2.5418907590  | -3.5394497063 | 0.0716962622  |
| H35 | 1.3283199155  | -4.7637921306 | -0.2948413662 |
| H36 | 1.2387234773  | -4.0429205442 | -2.6659775334 |
| H37 | 2.9066648604  | -4.4175088904 | -2.2352613372 |
| C38 | -4.1300818705 | -1.1692462281 | -0.5515578175 |
| C39 | -2.6570667751 | -1.2795330357 | -0.1208798080 |
| C40 | -1.8356311103 | -0.1129265771 | -0.7138248581 |
| C41 | -1.9517441849 | -0.0955585635 | -2.2519410522 |
| C42 | -3.4273219828 | 0.0176307780  | -2.6828730966 |
| C43 | -4.2786076198 | -1.1116909238 | -2.0805492239 |
| H44 | -4.5594243963 | -0.2618259905 | -0.1041404741 |
| H45 | -4.7003963664 | -2.0169380661 | -0.1478597560 |
| H46 | -2.2555126344 | -2.2426653885 | -0.4628586813 |
| H47 | -2.5867634943 | -1.2580075709 | 0.9704839839  |
| H48 | -2.3024484479 | 0.7991500196  | -0.3208246793 |
| H49 | -1.3771405633 | 0.7326880725  | -2.6852645110 |
| H50 | -1.5345739358 | -1.0217652704 | -2.6699372541 |
| H51 | -3.8245504244 | 0.9879980451  | -2.3499816366 |
| H52 | -3.4989904410 | 0.0080575521  | -3.7798739783 |
| H53 | -3.9560741700 | -2.0721777226 | -2.5125028174 |
| H54 | -5.3334669660 | -0.9825897712 | -2.3606963472 |

#### Conformer G, $\tau_2$

|     |               |               |               |
|-----|---------------|---------------|---------------|
| Pd1 | 0.1405589811  | 0.1680897506  | 2.3815304684  |
| Cl2 | 0.7236377655  | 0.3735903998  | 4.6763964075  |
| Cl3 | -1.2222718379 | -1.6953735002 | 2.9585485991  |
| Cl4 | 1.8414791656  | 1.7910235470  | 1.8562443893  |
| P1  | -0.3016946105 | 0.0842601822  | 0.0324973956  |
| C4  | -4.1484842358 | -1.7431761522 | -0.5451863011 |
| C5  | -2.7783174442 | -1.4832525248 | 0.1053237993  |
| C6  | -1.9175524695 | -0.5482016771 | -0.7671119054 |
| C7  | -1.7643615815 | -1.1501338936 | -2.1849411428 |

|     |               |               |               |
|-----|---------------|---------------|---------------|
| C8  | -3.1360527537 | -1.4118731864 | -2.8363137273 |
| C9  | -4.0157802483 | -2.3169409395 | -1.9627228099 |
| H10 | -4.7152809644 | -0.7995388433 | -0.5906480470 |
| H11 | -4.7306411143 | -2.4239441202 | 0.0899479123  |
| H12 | -2.9046363046 | -1.0633515609 | 1.1039916460  |
| H13 | -2.2562581859 | -2.4354308618 | 0.2587266599  |
| H14 | -2.4874734381 | 0.3881717975  | -0.8716349916 |
| H15 | -1.1752154103 | -0.4991405527 | -2.8357837125 |
| H16 | -1.2219941249 | -2.1016484095 | -2.1146184131 |
| H17 | -3.6489585496 | -0.4504959563 | -2.9948786312 |
| H18 | -2.9935488788 | -1.8561738975 | -3.8315809001 |
| H19 | -3.5588340214 | -3.3166435062 | -1.9061751761 |
| H20 | -5.0044701162 | -2.4499457289 | -2.4241628390 |
| C21 | -0.8722464447 | 4.2544650515  | -0.2881936353 |
| C22 | -1.0634096383 | 2.7911249572  | 0.1393658435  |
| C23 | -0.1894169586 | 1.8299172040  | -0.7016878384 |
| C24 | -0.4932541976 | 2.0272702505  | -2.2030425430 |
| C25 | -0.2709805031 | 3.4930084056  | -2.6235735134 |
| C26 | -1.1291999042 | 4.4542470994  | -1.7881485720 |
| H27 | 0.1556433656  | 4.5579976792  | -0.0437151063 |
| H28 | -1.5375711787 | 4.9000135622  | 0.3011810169  |
| H29 | -2.1265589091 | 2.5202420122  | 0.0335736643  |
| H30 | -0.7976323294 | 2.6827992024  | 1.1950482202  |
| H31 | 0.8528497320  | 2.1057040308  | -0.5085954958 |
| H32 | 0.1288884401  | 1.3752995390  | -2.8245592527 |
| H33 | -1.5388788665 | 1.7650462292  | -2.4167435002 |
| H34 | 0.7908547270  | 3.7488762000  | -2.4928362084 |
| H35 | -0.4930077075 | 3.6080572430  | -3.6940700466 |
| H36 | -2.1927006191 | 4.2673232980  | -2.0055150537 |
| H37 | -0.9295588253 | 5.4953857647  | -2.0775411413 |
| C38 | 3.0438583333  | -1.5395113551 | -2.1739522451 |
| C39 | 1.7091669028  | -0.7845187822 | -2.0099418063 |
| C40 | 1.1924998849  | -0.9108884196 | -0.5610381152 |
| C41 | 1.0569699546  | -2.3942098896 | -0.1412997432 |
| C42 | 2.3905056727  | -3.1404819450 | -0.3200574489 |
| C43 | 2.9243222120  | -3.0133373768 | -1.7556602686 |
| H44 | 3.8081483221  | -1.0494803621 | -1.5533697141 |
| H45 | 3.3880494413  | -1.4631453351 | -3.2151305036 |
| H46 | 0.9799825507  | -1.1926195014 | -2.7213600442 |
| H47 | 1.8612743909  | 0.2688869077  | -2.2710113093 |
| H48 | 1.9594391191  | -0.4646339596 | 0.0878640046  |
| H49 | 0.7217131842  | -2.4620558029 | 0.8995964060  |
| H50 | 0.2897468455  | -2.8889981662 | -0.7544418296 |
| H51 | 3.1280311557  | -2.7268649709 | 0.3826645781  |
| H52 | 2.2624327096  | -4.1979080147 | -0.0519865384 |
| H53 | 2.2376445875  | -3.5301807247 | -2.4446384465 |
| H54 | 3.8976947472  | -3.5143893201 | -1.8508081676 |

#### Conformer G, $\tau_3$

|     |               |               |               |
|-----|---------------|---------------|---------------|
| Pd1 | -0.2552812227 | 0.2092978599  | 2.3853647031  |
| Cl2 | -0.4619594635 | 0.4593799127  | 4.7476211995  |
| Cl3 | -2.5457873469 | 0.9048043994  | 2.1078987568  |
| Cl4 | 2.0624078864  | -0.3208388711 | 2.6515526032  |
| P1  | -0.0999717823 | -0.0026259347 | 0.0448351269  |
| C4  | -3.6263027183 | -2.3092076508 | -0.3385656126 |
| C5  | -2.2231910289 | -1.8995100969 | 0.1405665318  |
| C6  | -1.6675913982 | -0.7357097859 | -0.7193512022 |

|     |               |               |               |
|-----|---------------|---------------|---------------|
| C7  | -1.6279096199 | -1.1728898413 | -2.2013795373 |
| C8  | -3.0328342395 | -1.5771078876 | -2.6909745917 |
| C9  | -3.6377453767 | -2.6926510404 | -1.8260954825 |
| H10 | -4.3149254896 | -1.4695021692 | -0.1672547303 |
| H11 | -3.9956512556 | -3.1444687909 | 0.2715843732  |
| H12 | -2.2669249761 | -1.5961511441 | 1.1884005966  |
| H13 | -1.5504587885 | -2.7655044348 | 0.0724547531  |
| H14 | -2.3792499954 | 0.0944658608  | -0.6131754691 |
| H15 | -1.2354991279 | -0.3848206423 | -2.8485912484 |
| H16 | -0.9559939402 | -2.0352933885 | -2.3107611996 |
| H17 | -3.6900025308 | -0.6950232239 | -2.6585799491 |
| H18 | -2.9828467644 | -1.8916449426 | -3.7433521380 |
| H19 | -3.0495651321 | -3.6128575202 | -1.9675708787 |
| H20 | -4.6596397639 | -2.9214694470 | -2.1601912641 |
| C21 | 0.1360085764  | 4.2343994421  | -0.2761816939 |
| C22 | -0.2802756054 | 2.8468432392  | 0.2398176387  |
| C23 | 0.2116603633  | 1.7200936177  | -0.6989006185 |
| C24 | -0.2910734554 | 1.9731475671  | -2.1373247001 |
| C25 | 0.1222978966  | 3.3670245454  | -2.6485030010 |
| C26 | -0.3550956441 | 4.4831062743  | -1.7095125017 |
| H27 | 1.2334938010  | 4.3213392312  | -0.2510970517 |
| H28 | -0.2528602144 | 5.0066177605  | 0.4004080735  |
| H29 | -1.3710971277 | 2.7943333935  | 0.3387156914  |
| H30 | 0.1128637074  | 2.6846477101  | 1.2484600518  |
| H31 | 1.3122109721  | 1.7674568446  | -0.7102951674 |
| H32 | 0.0879599485  | 1.2141988285  | -2.8291849310 |
| H33 | -1.3876968632 | 1.9010363444  | -2.1538981810 |
| H34 | 1.2193997908  | 3.4078775656  | -2.7313117510 |
| H35 | -0.2726139494 | 3.5192342529  | -3.6631147761 |
| H36 | -1.4552374816 | 4.5128120882  | -1.7153614046 |
| H37 | -0.0125460954 | 5.4615277704  | -2.0748888121 |
| C38 | 3.2268854419  | -1.5765283325 | -2.1770445237 |
| C39 | 1.8787757406  | -0.8542398742 | -1.9784065454 |
| C40 | 1.4006355104  | -0.9933141707 | -0.5171370226 |
| C41 | 1.3009517942  | -2.4798688045 | -0.1102218731 |
| C42 | 2.6486326275  | -3.1936418310 | -0.3125509039 |
| C43 | 3.1538816500  | -3.0527215925 | -1.7567419529 |
| H44 | 3.9944599459  | -1.0686072082 | -1.5748537142 |
| H45 | 3.5431561629  | -1.4917278091 | -3.2265454242 |
| H46 | 1.1403663450  | -1.2783150214 | -2.6717232137 |
| H47 | 1.9998302198  | 0.2007350584  | -2.2497837847 |
| H48 | 2.1714554763  | -0.5554476082 | 0.1314108052  |
| H49 | 1.0010757476  | -2.5523594506 | 0.9398162594  |
| H50 | 0.5341633301  | -2.9864906491 | -0.7140642921 |
| H51 | 3.3812217609  | -2.7591183512 | 0.3813556717  |
| H52 | 2.5522440668  | -4.2548958588 | -0.0451689059 |
| H53 | 2.4696745799  | -3.5868496985 | -2.4349455754 |
| H54 | 4.1384676506  | -3.5279302041 | -1.8688636985 |

Table SI4a

**3<sub>tBu</sub>,[Pd(PhI)L], $\eta^2$ -meta-para**

|    |          |           |           |
|----|----------|-----------|-----------|
| Pd | 0.349329 | -1.050091 | -0.268000 |
| P  | 2.278054 | 0.239273  | 0.027285  |
| C  | 2.087685 | 1.450608  | 1.542459  |
| C  | 3.822994 | -0.907517 | 0.355495  |

|   |           |           |           |
|---|-----------|-----------|-----------|
| C | 2.639656  | 1.306818  | -1.565417 |
| C | -1.254372 | -2.632136 | -0.048232 |
| C | -1.963223 | -2.334576 | 1.141880  |
| C | -2.949309 | -1.355625 | 1.160357  |
| C | -3.222046 | -0.637782 | -0.016640 |
| C | -2.530307 | -0.878990 | -1.193828 |
| C | -1.540838 | -1.894463 | -1.222666 |
| H | -0.634851 | -3.524092 | -0.094104 |
| H | -1.757508 | -2.905444 | 2.043350  |
| H | -3.500868 | -1.151593 | 2.071484  |
| H | -2.756785 | -0.327699 | -2.099856 |
| H | -1.139902 | -2.205879 | -2.183945 |
| C | 2.164453  | 0.643003  | 2.857272  |
| H | 1.859256  | 1.297461  | 3.684418  |
| H | 1.482983  | -0.214020 | 2.845356  |
| H | 3.172426  | 0.288860  | 3.085378  |
| C | 3.105569  | 2.606033  | 1.621676  |
| H | 4.140577  | 2.256082  | 1.655945  |
| H | 2.923551  | 3.179582  | 2.540914  |
| H | 3.010547  | 3.304739  | 0.786947  |
| C | 0.655882  | 2.038460  | 1.501773  |
| H | 0.494981  | 2.635863  | 2.409762  |
| H | 0.478650  | 2.691210  | 0.646991  |
| H | -0.094342 | 1.241334  | 1.476128  |
| C | 3.385881  | -2.027725 | 1.330404  |
| H | 4.204029  | -2.755529 | 1.420627  |
| H | 3.160158  | -1.663778 | 2.332740  |
| H | 2.499112  | -2.548474 | 0.953699  |
| C | 5.079693  | -0.214968 | 0.922191  |
| H | 4.917613  | 0.193305  | 1.923311  |
| H | 5.445713  | 0.592179  | 0.282521  |
| H | 5.887186  | -0.955453 | 1.006871  |
| C | 4.209780  | -1.625968 | -0.955955 |
| H | 4.944901  | -2.407328 | -0.721479 |
| H | 3.344753  | -2.111931 | -1.419556 |
| H | 4.672394  | -0.959941 | -1.687549 |
| C | 4.056902  | 1.905458  | -1.676002 |
| H | 4.114515  | 2.517171  | -2.586992 |
| H | 4.310004  | 2.554402  | -0.833591 |
| H | 4.831099  | 1.138417  | -1.759496 |
| C | 1.614234  | 2.459618  | -1.653563 |
| H | 1.699559  | 2.924903  | -2.644509 |
| H | 0.587405  | 2.095278  | -1.545819 |
| H | 1.786642  | 3.247021  | -0.916093 |
| C | 2.370222  | 0.420707  | -2.806085 |
| H | 2.459133  | 1.041880  | -3.707972 |
| H | 3.071681  | -0.407246 | -2.909742 |
| H | 1.359041  | 0.001805  | -2.773511 |
| I | -4.747372 | 0.862760  | 0.016335  |

**3<sub>tBu</sub>,[Pd(PhI)L], $\eta^2$ -ortho-meta**

|    |           |           |           |
|----|-----------|-----------|-----------|
| Pd | 0.069455  | -0.909625 | -0.505010 |
| P  | 2.048548  | 0.206657  | 0.045797  |
| C  | 2.649342  | -0.273123 | 1.839452  |
| C  | 3.458707  | -0.271172 | -1.213477 |
| C  | 1.800085  | 2.140746  | -0.018115 |
| C  | -1.540067 | -2.347742 | -1.081753 |
| C  | -1.723002 | -3.209711 | 0.028577  |

|   |           |           |           |
|---|-----------|-----------|-----------|
| C | -2.532276 | -2.824133 | 1.088612  |
| C | -3.171511 | -1.569700 | 1.084336  |
| C | -2.967513 | -0.709943 | 0.015881  |
| C | -2.155105 | -1.067476 | -1.085362 |
| H | -1.090232 | -2.732886 | -1.994804 |
| H | -1.256038 | -4.190453 | 0.022703  |
| H | -2.688822 | -3.494754 | 1.929170  |
| H | -2.162455 | -0.462454 | -1.985970 |
| C | 3.195842  | -1.718230 | 1.822537  |
| H | 3.346213  | -2.045613 | 2.859909  |
| H | 2.487530  | -2.411685 | 1.356822  |
| H | 4.159870  | -1.807091 | 1.316693  |
| C | 3.715228  | 0.645286  | 2.470309  |
| H | 4.625225  | 0.712656  | 1.868578  |
| H | 4.000802  | 0.239711  | 3.450810  |
| H | 3.346003  | 1.659610  | 2.641806  |
| C | 1.405944  | -0.312489 | 2.761184  |
| H | 1.709425  | -0.696616 | 3.744971  |
| H | 0.952775  | 0.666394  | 2.918626  |
| H | 0.637347  | -0.977266 | 2.353029  |
| C | 3.357608  | -1.791368 | -1.489917 |
| H | 4.069016  | -2.052652 | -2.285583 |
| H | 3.596314  | -2.408760 | -0.623567 |
| H | 2.350143  | -2.058951 | -1.826787 |
| C | 4.901018  | 0.065797  | -0.784031 |
| H | 5.218396  | -0.496911 | 0.097556  |
| H | 5.044083  | 1.129327  | -0.576876 |
| H | 5.587914  | -0.202763 | -1.598586 |
| C | 3.179957  | 0.412762  | -2.570136 |
| H | 3.864066  | -0.006802 | -3.319784 |
| H | 2.156960  | 0.224796  | -2.912358 |
| H | 3.350900  | 1.491045  | -2.548061 |
| C | 3.087831  | 2.988187  | -0.072221 |
| H | 2.814588  | 4.052079  | -0.044335 |
| H | 3.753218  | 2.801871  | 0.774367  |
| H | 3.656446  | 2.830779  | -0.992465 |
| C | 0.970389  | 2.587810  | 1.206134  |
| H | 0.671292  | 3.633967  | 1.059111  |
| H | 0.055910  | 1.995661  | 1.313220  |
| H | 1.531211  | 2.544033  | 2.142518  |
| C | 0.926242  | 2.472119  | -1.252487 |
| H | 0.694389  | 3.545952  | -1.239019 |
| H | 1.414935  | 2.255598  | -2.202762 |
| H | -0.016988 | 1.917268  | -1.223704 |
| H | -3.814017 | -1.284084 | 1.910155  |
| I | -3.949847 | 1.189928  | -0.006397 |

**3<sub>tBu</sub>,[Pd(PhI)L],ipso**

|    |               |               |               |
|----|---------------|---------------|---------------|
| Pd | 0.5223738719  | 0.195650641   | -0.0107399179 |
| P  | -1.8176880524 | 0.3872286617  | 0.003051137   |
| C  | -2.6211117034 | -1.2331990796 | -0.7249152935 |
| C  | -2.4714055331 | 0.6299965635  | 1.8235243052  |
| C  | -2.4182502666 | 1.9034023119  | -1.0669615558 |
| C  | 3.5614895651  | 2.6635666565  | -0.1103180242 |
| C  | 3.3342422377  | 2.0431862479  | 1.1216333631  |
| C  | 2.8617092113  | 0.7279738134  | 1.182125486   |
| C  | 2.6036358334  | 0.0252410983  | -0.0226074028 |

|   |               |               |               |
|---|---------------|---------------|---------------|
| C | 2.8134079759  | 0.6634146934  | -1.2717418977 |
| C | 3.2872631483  | 1.9804177304  | -1.2978474021 |
| H | 3.9512548713  | 3.6769604971  | -0.1442499814 |
| H | 3.5390812088  | 2.5746918881  | 2.0474500981  |
| H | 2.7504069098  | 0.2271210368  | 2.1375886028  |
| H | 2.6701624549  | 0.1131651898  | -2.1951859641 |
| H | 3.4567775669  | 2.4621880972  | -2.2574318754 |
| C | -2.4571001686 | -2.3874902087 | 0.2894131849  |
| H | -2.7351731426 | -3.326478733  | -0.2072538977 |
| H | -1.419773107  | -2.4881158981 | 0.6249642182  |
| H | -3.1027157881 | -2.2866857391 | 1.1648837394  |
| C | -4.1085317668 | -1.1366846883 | -1.1194700343 |
| H | -4.7499365048 | -0.8401945791 | -0.2855793026 |
| H | -4.4515926494 | -2.1230287391 | -1.46100234   |
| H | -4.2777926267 | -0.4384460359 | -1.9429361199 |
| C | -1.7965630738 | -1.656121467  | -1.9657371459 |
| H | -2.1689086015 | -2.6268113025 | -2.3209196714 |
| H | -1.872181428  | -0.9548421066 | -2.796877114  |
| H | -0.736789128  | -1.7699558205 | -1.7143528286 |
| C | -1.6490491281 | -0.2994883616 | 2.7490328636  |
| H | -1.9376056939 | -0.1041787585 | 3.7910718733  |
| H | -1.8137473981 | -1.3598199852 | 2.5572935292  |
| H | -0.5764385127 | -0.1018508404 | 2.6483000692  |
| C | -3.973533269  | 0.3616094536  | 2.0494715374  |
| H | -4.2444489849 | -0.68164396   | 1.8677658131  |
| H | -4.6153765414 | 0.9916232673  | 1.4280918993  |
| H | -4.2211179213 | 0.5782983017  | 3.0978031427  |
| C | -2.154554588  | 2.0666709587  | 2.2949139137  |
| H | -2.3411980134 | 2.1268516521  | 3.3753502447  |
| H | -1.1039912438 | 2.3248089452  | 2.1254580668  |
| H | -2.7831569858 | 2.823255933   | 1.8195417055  |
| C | -3.8761813342 | 2.3564529913  | -0.8467647665 |
| H | -4.1029700925 | 3.1791579737  | -1.5390059644 |
| H | -4.6007050233 | 1.5610955655  | -1.0392767937 |
| H | -4.0481549154 | 2.7350572205  | 0.1639966423  |
| C | -2.2284155799 | 1.5781670495  | -2.5653123501 |
| H | -2.3821664343 | 2.4991675091  | -3.143099624  |
| H | -1.2147335352 | 1.221412266   | -2.7760898809 |
| H | -2.9446929656 | 0.8430072126  | -2.9390143903 |
| C | -1.4707707793 | 3.0937104351  | -0.7795251067 |
| H | -1.7191701976 | 3.9140613479  | -1.4669085194 |
| H | -1.5582092199 | 3.4816645657  | 0.2353510924  |
| H | -0.4254444075 | 2.81181968    | -0.9428607753 |
| I | 2.5584706801  | -2.1912579671 | 0.0396588949  |

**3<sub>tBu</sub>,[Pd(PhI)L],via I**

|   |           |           |           |
|---|-----------|-----------|-----------|
| P | -2.205643 | 0.182870  | 0.006251  |
| C | -2.590811 | 1.498964  | -1.384624 |
| C | -3.336211 | -1.377425 | -0.304724 |
| C | -2.699714 | 0.958151  | 1.729665  |
| C | -2.559633 | 0.803186  | -2.763240 |
| H | -2.573104 | 1.575206  | -3.544253 |
| H | -1.646619 | 0.213031  | -2.894528 |
| H | -3.423559 | 0.157541  | -2.936404 |
| C | -3.922069 | 2.266369  | -1.254418 |
| H | -4.793036 | 1.605668  | -1.240354 |
| H | -4.035032 | 2.934028  | -2.120070 |

|    |           |           |           |
|----|-----------|-----------|-----------|
| H  | -3.958623 | 2.895633  | -0.361359 |
| C  | -1.422268 | 2.514112  | -1.409214 |
| H  | -1.567677 | 3.199523  | -2.255906 |
| H  | -1.355416 | 3.119713  | -0.505374 |
| H  | -0.464937 | 1.998689  | -1.542866 |
| C  | -2.680823 | -2.226367 | -1.421170 |
| H  | -3.239241 | -3.167549 | -1.521687 |
| H  | -2.686074 | -1.737529 | -2.395613 |
| H  | -1.641406 | -2.463605 | -1.170922 |
| C  | -4.800790 | -1.086538 | -0.689900 |
| H  | -4.886947 | -0.575073 | -1.652165 |
| H  | -5.325534 | -0.489328 | 0.059993  |
| H  | -5.341025 | -2.038732 | -0.784968 |
| C  | -3.328905 | -2.271901 | 0.955050  |
| H  | -3.797849 | -3.232083 | 0.702217  |
| H  | -2.309091 | -2.479592 | 1.295366  |
| H  | -3.897298 | -1.847418 | 1.785869  |
| C  | -4.210089 | 1.049418  | 2.027410  |
| H  | -4.355022 | 1.554127  | 2.992716  |
| H  | -4.755652 | 1.624265  | 1.274905  |
| H  | -4.679811 | 0.065671  | 2.109528  |
| C  | -2.089788 | 2.372507  | 1.841945  |
| H  | -2.204953 | 2.720897  | 2.876940  |
| H  | -1.018999 | 2.366203  | 1.611998  |
| H  | -2.583471 | 3.106118  | 1.200605  |
| C  | -2.016126 | 0.123518  | 2.839876  |
| H  | -2.176203 | 0.623500  | 3.805317  |
| H  | -2.413756 | -0.887875 | 2.925985  |
| H  | -0.938181 | 0.046409  | 2.662491  |
| Pd | 0.016054  | -0.413986 | -0.024653 |
| C  | 3.870539  | 0.209128  | -0.000629 |
| C  | 3.393957  | 1.517658  | -0.060107 |
| C  | 5.234505  | -0.072718 | 0.066093  |
| C  | 4.315812  | 2.568508  | -0.052086 |
| H  | 2.326865  | 1.711098  | -0.110085 |
| C  | 6.141782  | 0.990726  | 0.073020  |
| H  | 5.592318  | -1.096672 | 0.111992  |
| C  | 5.685855  | 2.308917  | 0.014142  |
| H  | 3.954812  | 3.592556  | -0.097925 |
| H  | 7.206914  | 0.781457  | 0.124913  |
| H  | 6.396156  | 3.130826  | 0.019899  |
| I  | 2.472194  | -1.426107 | -0.011859 |

**5<sub>tBu</sub>[Pd(Ph)(I)L],*trans* halide**

|    |           |           |           |
|----|-----------|-----------|-----------|
| Pd | 0.664963  | -0.418604 | -0.027780 |
| P  | -1.696760 | -0.082029 | -0.014058 |
| C  | -2.261081 | -1.627611 | -1.061258 |
| C  | -2.332263 | -0.304384 | 1.812779  |
| C  | -2.481668 | 1.525594  | -0.769861 |
| C  | 2.397331  | 4.045373  | -0.019667 |
| C  | 1.955075  | 3.476912  | 1.175145  |
| C  | 1.437300  | 2.175178  | 1.196623  |
| C  | 1.350807  | 1.444210  | 0.008690  |
| C  | 1.818185  | 1.998380  | -1.189107 |
| C  | 2.332240  | 3.300119  | -1.198378 |
| H  | 2.802030  | 5.053705  | -0.030109 |
| H  | 2.018870  | 4.037285  | 2.105047  |

|   |           |           |           |
|---|-----------|-----------|-----------|
| H | 1.120481  | 1.745458  | 2.140025  |
| H | 1.801957  | 1.421278  | -2.108202 |
| H | 2.694974  | 3.720794  | -2.133180 |
| C | -1.287953 | -2.789635 | -0.738304 |
| H | -1.510164 | -3.632305 | -1.406445 |
| H | -0.240270 | -2.513782 | -0.931712 |
| H | -1.361605 | -3.157643 | 0.284312  |
| C | -2.076287 | -1.331188 | -2.566165 |
| H | -2.221482 | -2.267182 | -3.120576 |
| H | -2.803937 | -0.614166 | -2.951666 |
| H | -1.068056 | -0.969795 | -2.792738 |
| C | -1.691537 | 1.923784  | -2.038517 |
| H | -2.105995 | 2.868377  | -2.415234 |
| H | -0.635353 | 2.088181  | -1.819341 |
| H | -1.767168 | 1.194211  | -2.844461 |
| C | -2.320617 | 2.700575  | 0.221835  |
| H | -2.645128 | 3.618526  | -0.284799 |
| H | -2.939524 | 2.593452  | 1.115344  |
| H | -1.279356 | 2.845372  | 0.523999  |
| C | -3.974019 | 1.391092  | -1.140090 |
| H | -4.603135 | 1.111990  | -0.292141 |
| H | -4.140832 | 0.668578  | -1.942895 |
| H | -4.329562 | 2.363440  | -1.506045 |
| C | -3.709505 | -2.101762 | -0.831243 |
| H | -3.884963 | -2.442044 | 0.191639  |
| H | -3.908336 | -2.956029 | -1.492329 |
| H | -4.447697 | -1.330683 | -1.065491 |
| C | -1.505595 | 0.627173  | 2.729780  |
| H | -1.877556 | 0.522188  | 3.757609  |
| H | -0.451468 | 0.336555  | 2.724460  |
| H | -1.570074 | 1.681407  | 2.462019  |
| C | -2.030660 | -1.737373 | 2.308180  |
| H | -2.232797 | -1.774040 | 3.386482  |
| H | -2.658982 | -2.498046 | 1.840540  |
| H | -0.979097 | -2.008393 | 2.167767  |
| C | -3.834523 | -0.023741 | 2.023507  |
| H | -4.475037 | -0.632164 | 1.380400  |
| H | -4.092789 | -0.264824 | 3.063202  |
| H | -4.092523 | 1.026416  | 1.867825  |
| I | 3.057288  | -1.500114 | 0.039090  |

**5<sub>tBu</sub>[Pd(Ph)(I)L],*trans* aryl**

|    |           |           |           |
|----|-----------|-----------|-----------|
| Pd | -0.712815 | 0.243561  | 0.000271  |
| P  | 1.770622  | 0.284902  | -0.000719 |
| C  | 2.480103  | 0.013427  | 1.785106  |
| C  | 2.643398  | -0.934685 | -1.231759 |
| C  | 2.132105  | 2.116027  | -0.554125 |
| C  | -4.998118 | 2.212388  | -0.000987 |
| C  | -4.416638 | 1.822715  | -1.210137 |
| C  | -3.241019 | 1.063869  | -1.214711 |
| C  | -2.623501 | 0.736579  | 0.000712  |
| C  | -3.233359 | 1.079112  | 1.215792  |
| C  | -4.408934 | 1.838047  | 1.209228  |
| H  | -5.919986 | 2.788035  | -0.001686 |
| H  | -4.886217 | 2.091369  | -2.153487 |
| H  | -2.812404 | 0.732737  | -2.157113 |
| H  | -2.798970 | 0.760043  | 2.159782  |



|   |           |           |           |
|---|-----------|-----------|-----------|
| H | -4.872283 | 2.118900  | 2.152110  |
| C | 1.810748  | -1.249401 | 2.381182  |
| H | 2.136086  | -1.353362 | 3.424995  |
| H | 0.719781  | -1.170269 | 2.371729  |
| H | 2.078904  | -2.169666 | 1.863273  |
| C | 2.045282  | 1.183807  | 2.695581  |
| H | 2.305330  | 0.930084  | 3.731259  |
| H | 2.549771  | 2.123459  | 2.459987  |
| H | 0.962520  | 1.346954  | 2.663604  |
| C | 1.054348  | 3.010817  | 0.107831  |
| H | 1.159541  | 4.037964  | -0.266637 |
| H | 0.038289  | 2.679527  | -0.157843 |
| H | 1.120247  | 3.048610  | 1.194748  |
| C | 1.905874  | 2.259355  | -2.076833 |
| H | 1.941852  | 3.326568  | -2.332381 |
| H | 2.672678  | 1.760844  | -2.672955 |
| H | 0.924655  | 1.882712  | -2.384845 |
| C | 3.531145  | 2.671898  | -0.221114 |
| H | 4.332883  | 2.079867  | -0.670539 |
| H | 3.716728  | 2.733747  | 0.853902  |
| H | 3.615596  | 3.692225  | -0.619925 |
| C | 4.012614  | -0.133562 | 1.877191  |
| H | 4.377815  | -1.025381 | 1.361962  |
| H | 4.297596  | -0.234041 | 2.933261  |
| H | 4.545820  | 0.732762  | 1.477135  |
| C | 1.768332  | -1.031096 | -2.505247 |
| H | 2.203186  | -1.790629 | -3.168471 |
| H | 0.748207  | -1.342714 | -2.262461 |
| H | 1.718244  | -0.099657 | -3.069967 |
| C | 2.662895  | -2.357412 | -0.628522 |
| H | 3.006923  | -3.052052 | -1.405885 |
| H | 3.351438  | -2.455370 | 0.213765  |
| H | 1.666383  | -2.683345 | -0.316370 |
| C | 4.083599  | -0.549057 | -1.625712 |
| H | 4.752672  | -0.480793 | -0.763846 |
| H | 4.486960  | -1.323466 | -2.291948 |
| H | 4.133062  | 0.397635  | -2.169663 |
| I | -1.609366 | -2.227879 | -0.000340 |

**5<sub>tBu</sub>\*,[Pd(Ph)(I)L]\*,“Y”**

|    |               |               |               |
|----|---------------|---------------|---------------|
| Pd | -0.6500019723 | -0.158480147  | -0.0787082551 |
| P  | 1.8307301948  | 0.3964636437  | 0.0864906564  |
| C  | 2.2616342002  | 0.7870954935  | 1.9415366694  |
| C  | 2.9212683528  | -1.0965678968 | -0.5214246906 |
| C  | 2.2181258579  | 1.9591657395  | -1.0023719784 |
| C  | -4.4614928886 | 2.4210346669  | 0.8955172532  |
| C  | -4.0113722941 | 2.3209818189  | -0.4229885677 |
| C  | -2.9926991748 | 1.4216960724  | -0.7585699899 |
| C  | -2.3986916404 | 0.6595503992  | 0.2532736409  |
| C  | -2.8781723416 | 0.7086451542  | 1.5667802822  |
| C  | -3.8982205731 | 1.6125125557  | 1.8854377274  |
| H  | -5.2630224221 | 3.1104200279  | 1.1464285143  |
| H  | -4.4640787407 | 2.9283224549  | -1.2030575693 |
| H  | -2.6703930837 | 1.3210475304  | -1.7905251296 |
| H  | -2.4677810189 | 0.0562282493  | 2.331652203   |
| H  | -4.2626195836 | 1.6657522153  | 2.9085255968  |
| C  | 1.5415981061  | -0.2570114306 | 2.8302579818  |

|   |               |               |               |
|---|---------------|---------------|---------------|
| H | 1.685653457   | 0.0213381728  | 3.8827849062  |
| H | 0.4649973486  | -0.2767703585 | 2.6299221186  |
| H | 1.9220715937  | -1.2706452911 | 2.7064036432  |
| C | 1.6552323953  | 2.1543047501  | 2.328569709   |
| H | 1.7377799141  | 2.2743172253  | 3.4165046896  |
| H | 2.1769694185  | 2.9992216798  | 1.8736974656  |
| H | 0.5921819484  | 2.2182969601  | 2.0733203569  |
| C | 1.0554021999  | 2.966375639   | -0.8218198389 |
| H | 1.1999528141  | 3.7984248244  | -1.5238763926 |
| H | 0.0869773093  | 2.5059488144  | -1.0469852644 |
| H | 0.9991453856  | 3.3943513909  | 0.178947891   |
| C | 2.1951320333  | 1.5611377482  | -2.4948890797 |
| H | 2.2396524796  | 2.4779478963  | -3.0968721057 |
| H | 3.0475189343  | 0.9445269958  | -2.787135596  |
| H | 1.2726869074  | 1.0363915104  | -2.7642505824 |
| C | 3.553312639   | 2.670343855   | -0.7042488008 |
| H | 4.4168808124  | 2.0112365905  | -0.8231478914 |
| H | 3.5861554918  | 3.0961371618  | 0.3016866026  |
| H | 3.6775200709  | 3.5036354511  | -1.4090351515 |
| C | 3.7635316758  | 0.8000854754  | 2.2907645117  |
| H | 4.2298840043  | -0.1808770099 | 2.169505463   |
| H | 3.8816876439  | 1.08366922    | 3.3453289302  |
| H | 4.3282396535  | 1.5206894503  | 1.693697708   |
| C | 2.2646722684  | -1.6873966562 | -1.7931094106 |
| H | 2.826035441   | -2.5841955777 | -2.0873297761 |
| H | 1.2284433043  | -1.9884585357 | -1.6089187001 |
| H | 2.273022658   | -1.0066554269 | -2.6443778696 |
| C | 2.880836427   | -2.2257771759 | 0.5319923196  |
| H | 3.35196159    | -3.1163023955 | 0.0965634527  |
| H | 3.4342825122  | -1.9836731588 | 1.4419778857  |
| H | 1.8556321596  | -2.4993530397 | 0.801082667   |
| C | 4.3947923411  | -0.7541019982 | -0.8191978269 |
| H | 4.9100264865  | -0.3207914247 | 0.0417705188  |
| H | 4.9249165217  | -1.6776619408 | -1.0882425122 |
| H | 4.5047773864  | -0.068205603  | -1.6630894896 |
| I | -2.0693841151 | -2.260068438  | -0.6847697389 |

**3<sub>tBu</sub> [Pd(PhBr)L] η<sup>2</sup>-meta-para**

|    |               |               |               |
|----|---------------|---------------|---------------|
| Pd | 0.2793144643  | 0.7811420745  | -0.5785832375 |
| Br | -1.8195528879 | 2.6643853394  | 2.8611136014  |
| P  | 0.7683224321  | -1.5002784899 | -0.5009464473 |
| C  | 0.1685590781  | -2.2847952695 | 1.1828918862  |
| C  | -0.1215845948 | -2.4421937388 | -1.9613627313 |
| C  | 2.6894734606  | -1.804954942  | -0.663373243  |
| C  | -1.1119502228 | 3.0369304571  | -1.7806444447 |
| C  | -2.4031969348 | 3.0186353244  | -1.266859457  |
| C  | -2.6219102533 | 2.9131855859  | 0.1183587552  |
| C  | -1.5302529382 | 2.7957432019  | 0.9654817363  |
| C  | -0.2030423784 | 2.807140954   | 0.4842408576  |
| C  | 0.0060775561  | 2.9586188269  | -0.9119772532 |
| H  | -0.9483407657 | 3.153677985   | -2.8479974757 |
| H  | -3.2572505449 | 3.0986331464  | -1.9336610258 |
| H  | -3.6297891102 | 2.9190172279  | 0.5190700661  |
| H  | 0.6233373591  | 2.8865393777  | 1.1819706699  |
| H  | 1.0004308454  | 3.191703755   | -1.2880563682 |
| C  | -1.3729931097 | -2.384063972  | 1.177530168   |
| H  | -1.7085536336 | -2.6323458296 | 2.1931028158  |

|   |               |               |               |
|---|---------------|---------------|---------------|
| H | -1.8389826213 | -1.4329280917 | 0.9000055931  |
| H | -1.7489644239 | -3.1677555597 | 0.5156849025  |
| C | 0.7472240251  | -3.6723343629 | 1.5263719452  |
| H | 0.5445900164  | -4.4197130948 | 0.7550944345  |
| H | 0.285961675   | -4.0297639438 | 2.4573241255  |
| H | 1.8264039685  | -3.6446545614 | 1.6974031307  |
| C | 0.5162125924  | -1.2974038719 | 2.3233380846  |
| H | 0.0961349387  | -1.6846365735 | 3.2618347148  |
| H | 1.58833685    | -1.1693930111 | 2.4747439412  |
| H | 0.0806872915  | -0.310760884  | 2.1357909877  |
| C | -1.5549146112 | -1.8710018159 | -2.0901571226 |
| H | -2.0251103386 | -2.2974101664 | -2.9872921955 |
| H | -2.1947063552 | -2.1127994769 | -1.2414067357 |
| H | -1.5354584611 | -0.7811920936 | -2.1953621278 |
| C | -0.2037509183 | -3.9772455423 | -1.8376646485 |
| H | -0.8117544643 | -4.2955115272 | -0.9871692304 |
| H | 0.7786395428  | -4.448022706  | -1.7490178299 |
| H | -0.6800550152 | -4.3830306267 | -2.7409301445 |
| C | 0.5815714271  | -2.0974770143 | -3.2930082993 |
| H | -0.0368755926 | -2.4711380766 | -4.1199839206 |
| H | 0.6906740857  | -1.0157177097 | -3.424873118  |
| H | 1.5641046521  | -2.5642744259 | -3.3938185107 |
| C | 3.1226374854  | -3.241837211  | -1.0162812279 |
| H | 4.2202413611  | -3.2923639324 | -1.0233078643 |
| H | 2.7671019871  | -3.9797545644 | -0.2928188583 |
| H | 2.7837929972  | -3.5484128179 | -2.0090290279 |
| C | 3.384860276   | -1.3935271228 | 0.6529443736  |
| H | 4.4701348011  | -1.3850358203 | 0.4850196212  |
| H | 3.0904849362  | -0.3871656407 | 0.9684297555  |
| H | 3.1936789808  | -2.0880168483 | 1.4737825395  |
| C | 3.2333935995  | -0.8344713144 | -1.7403223708 |
| H | 4.3298372999  | -0.9055594493 | -1.7589674096 |
| H | 2.8748344838  | -1.057970947  | -2.7453819618 |
| H | 2.9590012598  | 0.2002229338  | -1.5071759561 |

**3<sub>tBu</sub>** [Pd(PhBr)L]  $\eta^2$ -*ortho-meta*

|    |          |          |          |
|----|----------|----------|----------|
| Pd | -0.31887 | -0.77944 | -0.51323 |
| P  | 1.75746  | 0.13657  | 0.04427  |
| C  | 2.27736  | -0.36995 | 1.85532  |
| C  | 3.13306  | -0.49841 | -1.18578 |
| C  | 1.70255  | 2.0845   | -0.05238 |
| C  | -2.08453 | -2.01131 | -1.08868 |
| C  | -2.34555 | -2.84507 | 0.0281   |
| C  | -3.10034 | -2.37335 | 1.09436  |
| C  | -3.60698 | -1.06054 | 1.08941  |
| C  | -3.32183 | -0.23238 | 0.01516  |
| C  | -2.5599  | -0.67351 | -1.09016 |
| H  | -1.68762 | -2.44462 | -2.00459 |
| H  | -1.98364 | -3.86915 | 0.02273  |
| H  | -3.31642 | -3.02111 | 1.93944  |
| H  | -2.51253 | -0.0672  | -1.98849 |
| C  | 2.67415  | -1.86267 | 1.8706   |
| H  | 2.768    | -2.1881  | 2.91514  |
| H  | 1.91048  | -2.48817 | 1.39652  |
| H  | 3.63512  | -2.05481 | 1.38865  |
| C  | 3.42167  | 0.44542  | 2.4911   |
| H  | 4.34459  | 0.40864  | 1.90644  |

|    |          |          |          |
|----|----------|----------|----------|
| H  | 3.64741  | 0.02963  | 3.48286  |
| H  | 3.15541  | 1.49488  | 2.63984  |
| C  | 1.02235  | -0.26643 | 2.75693  |
| H  | 1.2735   | -0.65342 | 3.75422  |
| H  | 0.66282  | 0.75466  | 2.88416  |
| H  | 0.19886  | -0.8641  | 2.35206  |
| C  | 2.88547  | -2.00612 | -1.4356  |
| H  | 3.56198  | -2.34892 | -2.23069 |
| H  | 3.0719   | -2.62639 | -0.55856 |
| H  | 1.85378  | -2.18252 | -1.75943 |
| C  | 4.59482  | -0.29642 | -0.73844 |
| H  | 4.84249  | -0.87211 | 0.157    |
| H  | 4.83731  | 0.75181  | -0.54628 |
| H  | 5.26417  | -0.64521 | -1.53705 |
| C  | 2.94315  | 0.18527  | -2.55792 |
| H  | 3.59243  | -0.315   | -3.28876 |
| H  | 1.9118   | 0.09543  | -2.91476 |
| H  | 3.22222  | 1.24102  | -2.5523  |
| C  | 3.06924  | 2.79815  | -0.08999 |
| H  | 2.90469  | 3.88454  | -0.08358 |
| H  | 3.69498  | 2.55957  | 0.77387  |
| H  | 3.63821  | 2.56864  | -0.99466 |
| C  | 0.89843  | 2.63152  | 1.14758  |
| H  | 0.70648  | 3.69943  | 0.97907  |
| H  | -0.07176 | 2.13379  | 1.24466  |
| H  | 1.43499  | 2.54876  | 2.09548  |
| C  | 0.89021  | 2.48083  | -1.30901 |
| H  | 0.77429  | 3.57326  | -1.32059 |
| H  | 1.36884  | 2.1929   | -2.24514 |
| H  | -0.10722 | 2.02996  | -1.28758 |
| Br | -4.02974 | 1.55436  | -0.01126 |
| H  | -4.21059 | -0.70032 | 1.91538  |

**3<sub>tBu</sub>** [Pd(PhBr)L]  $\eta^2$ -*ipso-ortho*

|    |          |          |          |
|----|----------|----------|----------|
| Pd | -0.68457 | 0.13647  | 0.09715  |
| P  | 1.65473  | -0.02993 | -0.00793 |
| C  | 2.46112  | 1.67095  | -0.51914 |
| C  | 2.40843  | -0.57531 | 1.70605  |
| C  | 2.13914  | -1.36445 | -1.34469 |
| C  | -2.64699 | 0.82816  | 1.2139   |
| C  | -2.75399 | 2.23709  | 1.21906  |
| C  | -3.02948 | 2.93505  | 0.04863  |
| C  | -3.16225 | 2.2431   | -1.16726 |
| C  | -3.06285 | 0.85571  | -1.21172 |
| C  | -2.82817 | 0.13301  | -0.01135 |
| H  | -2.60378 | 0.28238  | 2.15038  |
| H  | -2.6504  | 2.76479  | 2.16352  |
| H  | -3.13711 | 4.01566  | 0.07155  |
| C  | 2.41129  | 2.64244  | 0.6815   |
| H  | 2.69374  | 3.64342  | 0.32936  |
| H  | 1.40324  | 2.7125   | 1.10277  |
| H  | 3.10852  | 2.37585  | 1.47913  |
| C  | 3.91371  | 1.60665  | -1.03409 |
| H  | 4.60048  | 1.16004  | -0.31052 |
| H  | 4.26763  | 2.62791  | -1.23207 |
| H  | 4.00186  | 1.05236  | -1.97218 |
| C  | 1.56779  | 2.31384  | -1.60815 |

|    |          |          |          |
|----|----------|----------|----------|
| H  | 1.94935  | 3.32115  | -1.82534 |
| H  | 1.5615   | 1.75901  | -2.54671 |
| H  | 0.53244  | 2.40384  | -1.26331 |
| C  | 1.67925  | 0.21469  | 2.82014  |
| H  | 2.01938  | -0.15857 | 3.7959   |
| H  | 1.87729  | 1.28629  | 2.79299  |
| H  | 0.59583  | 0.0714   | 2.75445  |
| C  | 3.93043  | -0.38842 | 1.87046  |
| H  | 4.23125  | 0.66163  | 1.82949  |
| H  | 4.50766  | -0.93565 | 1.12065  |
| H  | 4.23233  | -0.76934 | 2.85588  |
| C  | 2.06517  | -2.05967 | 1.95857  |
| H  | 2.30437  | -2.30047 | 3.00284  |
| H  | 0.99864  | -2.2579  | 1.80937  |
| H  | 2.64149  | -2.74457 | 1.33243  |
| C  | 3.59316  | -1.87521 | -1.30068 |
| H  | 3.74963  | -2.57853 | -2.13017 |
| H  | 4.32728  | -1.0732  | -1.41176 |
| H  | 3.81746  | -2.4165  | -0.37815 |
| C  | 1.86299  | -0.79318 | -2.75338 |
| H  | 1.96076  | -1.60706 | -3.48388 |
| H  | 0.84624  | -0.39478 | -2.83631 |
| H  | 2.57028  | -0.01406 | -3.04567 |
| C  | 1.17793  | -2.56873 | -1.18969 |
| H  | 1.34516  | -3.26116 | -2.02617 |
| H  | 1.33091  | -3.13002 | -0.26792 |
| H  | 0.13168  | -2.24581 | -1.21658 |
| H  | -3.35897 | 2.78919  | -2.08626 |
| Br | -3.32372 | -1.75765 | 0.02752  |
| H  | -3.21646 | 0.31487  | -2.13963 |

**3<sub>t</sub>Bu** [Pd(PhBr)L] ipso

|    |               |               |               |
|----|---------------|---------------|---------------|
| Pd | -0.1630513562 | 0.6792382418  | 0.075349362   |
| P  | 0.4745160689  | -1.5259499674 | -0.3927204973 |
| C  | -0.120517688  | -2.6923648198 | 1.0527834239  |
| C  | -0.3232801374 | -2.1587974901 | -2.0553555271 |
| C  | 2.413411906   | -1.6863231781 | -0.5473605445 |
| C  | -1.6532257385 | -2.8704215296 | 0.9687260288  |
| H  | -1.9979537436 | -3.3568354827 | 1.8908854256  |
| H  | -2.1699104381 | -1.9080545592 | 0.8914837621  |
| H  | -1.9663552597 | -3.5050959473 | 0.1366083002  |
| C  | 0.5301122877  | -4.0885966301 | 1.1108331668  |
| H  | 0.3881321455  | -4.6614306718 | 0.1908203568  |
| H  | 0.070758709   | -4.6621961078 | 1.9275922838  |
| H  | 1.601741207   | -4.0411949172 | 1.3198018669  |
| C  | 0.1372547863  | -1.9589524693 | 2.3920915717  |
| H  | -0.291802399  | -2.5564382817 | 3.2082263779  |
| H  | 1.1956377662  | -1.8189273902 | 2.6126606368  |
| H  | -0.3420369411 | -0.9741700841 | 2.4008123243  |
| C  | -1.7832040186 | -1.6468947257 | -2.108505074  |
| H  | -2.2045478124 | -1.8867023448 | -3.0944587647 |
| H  | -2.4295789782 | -2.1036393843 | -1.3586669188 |
| H  | -1.8215673789 | -0.5612495883 | -1.9717636352 |
| C  | -0.3192635278 | -3.6851339802 | -2.2759424011 |
| H  | -0.9315972052 | -4.2159957561 | -1.5425629558 |
| H  | 0.6862046387  | -4.112617867  | -2.2525694383 |
| H  | -0.7442100089 | -3.9039707164 | -3.2653675671 |

|    |               |               |               |
|----|---------------|---------------|---------------|
| C  | 0.3927779859  | -1.4907794891 | -3.2503031716 |
| H  | -0.1864566293 | -1.6943308197 | -4.1608006394 |
| H  | 0.4505584911  | -0.4040388584 | -3.1305900085 |
| H  | 1.3990648133  | -1.8807685709 | -3.4190137577 |
| C  | 2.9443843594  | -2.9885449615 | -1.1806697445 |
| H  | 4.0429092687  | -2.9723704305 | -1.1599676281 |
| H  | 2.6226191855  | -3.8842990934 | -0.643205192  |
| H  | 2.6486521573  | -3.0957334369 | -2.2273775651 |
| C  | 3.0472463657  | -1.5306811298 | 0.8530140605  |
| H  | 4.1340786893  | -1.4285946001 | 0.7339270823  |
| H  | 2.6847460299  | -0.6322799448 | 1.3636066548  |
| H  | 2.8763586459  | -2.3944712006 | 1.4994550028  |
| C  | 2.9280474405  | -0.4808035525 | -1.3717240794 |
| H  | 4.0265155228  | -0.48067575   | -1.3459586068 |
| H  | 2.6279358652  | -0.5133802743 | -2.4192910809 |
| H  | 2.5726242397  | 0.4647339476  | -0.9494828591 |
| C  | 0.0074750658  | 3.7860642958  | -1.8519881537 |
| C  | -1.2745712286 | 3.2471901204  | -1.715036488  |
| C  | -1.684030717  | 2.6688395798  | -0.5054575912 |
| C  | -0.7833640468 | 2.643511431   | 0.5918089417  |
| C  | 0.5392068093  | 3.1340699825  | 0.4316077525  |
| C  | 0.9149262861  | 3.7049108906  | -0.7921022799 |
| H  | 0.3020382948  | 4.2579165961  | -2.784871408  |
| H  | -1.9785298948 | 3.290811789   | -2.5418846551 |
| H  | -2.708156359  | 2.3393259049  | -0.3690327868 |
| H  | 1.2110340759  | 3.1580986439  | 1.2825255276  |
| H  | 1.9195801222  | 4.1052134585  | -0.8992788469 |
| Br | -1.5081766459 | 2.4639970875  | 2.4006844621  |

**3<sub>t</sub>Bu** [Pd(PhBr)L] via Br

|   |               |               |               |
|---|---------------|---------------|---------------|
| P | 1.611640786   | 1.082256294   | 0.3379932312  |
| C | 1.1710795084  | 2.1089501747  | 1.9412852727  |
| C | 3.3713521525  | 0.2772598923  | 0.5990701792  |
| C | 1.7314543742  | 2.3251522262  | -1.1634750239 |
| C | 1.4232364889  | 1.2313315714  | 3.1868829989  |
| H | 0.9909250597  | 1.734151057   | 4.0623444426  |
| H | 0.9398646923  | 0.2533180137  | 3.0922687341  |
| H | 2.4845373367  | 1.0801367599  | 3.3962656208  |
| C | 1.9133179577  | 3.4477901188  | 2.1260013693  |
| H | 2.9998844315  | 3.3312532723  | 2.1521126829  |
| H | 1.6112018035  | 3.8937501865  | 3.0839794482  |
| H | 1.6683576837  | 4.1739435956  | 1.3467259287  |
| C | -0.3535435559 | 2.3761058935  | 1.9275425066  |
| H | -0.6383142381 | 2.8477313483  | 2.8785262411  |
| H | -0.6696323471 | 3.0426377519  | 1.1248270512  |
| H | -0.9094103538 | 1.4376928503  | 1.8272858878  |
| C | 3.1917076455  | -0.9910986855 | 1.4680347297  |
| H | 4.1549214079  | -1.5170296191 | 1.5264683973  |
| H | 2.8743149294  | -0.775010671  | 2.4882768913  |
| H | 2.4531613695  | -1.6663079209 | 1.023281836   |
| C | 4.4421313783  | 1.1801475916  | 1.2448892254  |
| H | 4.1941051172  | 1.4563247243  | 2.2731550812  |
| H | 4.6197543669  | 2.0988387348  | 0.6801626992  |
| H | 5.3941172607  | 0.6326042516  | 1.2837749387  |
| C | 3.9102630197  | -0.2247620884 | -0.75895159   |
| H | 4.7988643007  | -0.842712014  | -0.5730977016 |
| H | 3.1750087659  | -0.8482629981 | -1.2780556978 |

|    |               |               |               |
|----|---------------|---------------|---------------|
| H  | 4.2173173781  | 0.5852312264  | -1.4244358364 |
| C  | 2.986449505   | 3.2203049552  | -1.2085538335 |
| H  | 2.9036795061  | 3.9099695167  | -2.0601058561 |
| H  | 3.1050948169  | 3.8284241454  | -0.3083421371 |
| H  | 3.9051726344  | 2.6458132049  | -1.3534343426 |
| C  | 0.4816943737  | 3.233080661   | -1.1725739281 |
| H  | 0.4597325849  | 3.7864961635  | -2.1207861553 |
| H  | -0.4402906827 | 2.6454525374  | -1.1108552668 |
| H  | 0.4820953843  | 3.9744187621  | -0.3700470862 |
| C  | 1.6529694002  | 1.5016612869  | -2.4721763339 |
| H  | 1.5972922211  | 2.1961356206  | -3.3221425025 |
| H  | 2.5191699945  | 0.8591085061  | -2.6318638639 |
| H  | 0.7595784378  | 0.868390388   | -2.4803470288 |
| Pd | 0.0498215925  | -0.5371846765 | -0.0665048095 |
| Br | -1.4232580718 | -2.5157814291 | -0.6162486674 |
| C  | -3.2910418362 | -2.0063254224 | -0.6487143493 |
| C  | -3.6563813596 | -0.7202365213 | -0.2592532256 |
| C  | -4.2276295639 | -2.9471327097 | -1.0718354139 |
| C  | -5.0096519703 | -0.3734730697 | -0.2930929762 |
| H  | -2.8964317311 | -0.0121489386 | 0.0572190717  |
| C  | -5.5761009706 | -2.581421004  | -1.0983080194 |
| H  | -3.9174008127 | -3.9423247097 | -1.3739514057 |
| C  | -5.9686164192 | -1.2987828698 | -0.7101427687 |
| H  | -5.3094249708 | 0.6265249307  | 0.0082346812  |
| H  | -6.3172433685 | -3.3055000364 | -1.4253963092 |
| H  | -7.0185162775 | -1.0213619139 | -0.733795232  |

| $3_{\text{tBu}}^{\dagger}$ | $[\text{Pd}(\text{PhBr})\text{L}]^{\dagger}$ | <i>meta</i>   |
|----------------------------|----------------------------------------------|---------------|
| Pd                         | -0.3233358674                                | -0.7494847824 |
| Br                         | -4.0610163488                                | 1.4666572436  |
| P                          | 1.7556751014                                 | 0.1707761206  |
| C                          | 1.5656198705                                 | 2.0300815342  |
| C                          | 2.5883206381                                 | -0.8221516778 |
| C                          | 2.9568483872                                 | 0.1152536922  |
| C                          | -2.2882696797                                | -2.8906002254 |
| C                          | -3.0251089988                                | -2.4952455416 |
| C                          | -3.5584868414                                | -1.195735083  |
| C                          | -3.3179919359                                | -0.3035077201 |
| C                          | -2.5766862004                                | -0.6661766952 |
| C                          | -2.0736302617                                | -1.991129041  |
| H                          | -1.9050425299                                | -3.904413324  |
| H                          | -3.205575599                                 | -3.1931613055 |
| H                          | -4.1476439753                                | -0.8947836814 |
| H                          | -2.564360737                                 | -0.0097219978 |
| H                          | -1.6908302573                                | -2.3644367691 |
| C                          | 0.9304868135                                 | 2.0766989801  |
| H                          | 0.6448003266                                 | 3.1143059036  |
| H                          | 0.0234407937                                 | 1.4663336371  |
| H                          | 1.6167709917                                 | 1.7619531876  |
| C                          | 2.8617138561                                 | 2.8649864109  |
| H                          | 3.6287116858                                 | 2.4398340096  |
| H                          | 2.6312427782                                 | 3.8703549452  |
| H                          | 3.2937797459                                 | 2.9908881866  |
| C                          | 0.5410703453                                 | 2.7094459297  |
| H                          | 0.3399579132                                 | 3.7230742826  |
| H                          | 0.8929747265                                 | 2.8042232768  |
| H                          | -0.4036973033                                | 2.1561917979  |

|   |              |               |
|---|--------------|---------------|
| C | 1.4925028797 | -1.1446982787 |
| H | 1.9203542999 | -1.8118423558 |
| H | 1.1144596554 | -0.2619189526 |
| H | 0.6411494123 | -1.6523121296 |
| C | 3.768688721  | -0.1296715921 |
| H | 3.4672131921 | 0.7863535994  |
| H | 4.5872784688 | 0.1161654684  |
| H | 4.1721675016 | -0.8078227101 |
| C | 3.0725901436 | -2.1917252038 |
| H | 3.3593235239 | -2.8125904592 |
| H | 2.2804099201 | -2.7207016976 |
| H | 3.9491132192 | -2.1166631645 |
| C | 4.4560723201 | 0.3210186446  |
| H | 5.0110709497 | 0.327819213   |
| H | 4.6609935597 | 1.2686618978  |
| H | 4.8758580875 | -0.4843871148 |
| C | 2.5149432751 | 1.1750183826  |
| H | 3.0654104543 | 1.0004707358  |
| H | 1.4462596612 | 1.0977284341  |
| H | 2.7338957386 | 2.1984194542  |
| C | 2.7679946565 | -1.2515551828 |
| H | 3.3551480479 | -1.2537563388 |
| H | 3.1033871363 | -2.0980820828 |
| H | 1.7158062688 | -1.4163732877 |

| $3_{\text{tBu}}^{\dagger}$ | $[\text{Pd}(\text{PhBr})\text{L}]^{\dagger}$ | <i>ortho</i>  |
|----------------------------|----------------------------------------------|---------------|
| Pd                         | -0.62613655                                  | -0.2742197081 |
| P                          | 1.570141002                                  | 0.3556750393  |
| C                          | 1.6201485105                                 | 2.2654503851  |
| C                          | 2.2116353                                    | -0.6063356686 |
| C                          | 2.7906108474                                 | 0.0018004119  |
| C                          | -2.2233213942                                | -2.994529376  |
| C                          | -2.8434777736                                | -2.864313593  |
| C                          | -3.3541613907                                | -1.6184524315 |
| C                          | -3.2857464141                                | -0.5141931695 |
| C                          | -2.6953821164                                | -0.6521726141 |
| C                          | -2.1352436253                                | -1.8963150141 |
| H                          | -1.8268508435                                | -3.9548705493 |
| H                          | -2.9296006482                                | -3.7234181171 |
| H                          | -3.8222951641                                | -1.5105694581 |
| H                          | -1.8074802242                                | -2.0472065834 |
| C                          | 0.9615957021                                 | 2.5248088096  |
| H                          | 0.8188901636                                 | 3.6072269602  |
| H                          | -0.0233863707                                | 2.0522468998  |
| H                          | 1.5753931279                                 | 2.1902741656  |
| C                          | 3.0149154605                                 | 2.9225130531  |
| H                          | 3.7012655601                                 | 2.4579473061  |
| H                          | 2.9124716582                                 | 3.9786499053  |
| H                          | 3.4849594336                                 | 2.9034413323  |
| C                          | 0.7212589983                                 | 2.9868513965  |
| H                          | 0.6545619096                                 | 4.0489396301  |
| H                          | 1.1055576816                                 | 2.9344617051  |
| H                          | -0.2914399248                                | 2.5692879536  |
| C                          | 1.0487909945                                 | -0.6850654428 |
| H                          | 1.3549501333                                 | -1.3341365786 |
| H                          | 0.7792399796                                 | 0.2823824964  |
| H                          | 0.1520923976                                 | -1.1133979349 |

|    |               |               |               |
|----|---------------|---------------|---------------|
| C  | 3.4547427427  | -0.0199181335 | 2.649003784   |
| H  | 3.2678236944  | 0.9687607717  | 3.0755315888  |
| H  | 4.320499702   | 0.0548792204  | 1.9859311125  |
| H  | 3.738273481   | -0.6787294921 | 3.4814384932  |
| C  | 2.5168217475  | -2.0692704398 | 1.5562168915  |
| H  | 2.6873122783  | -2.6469777356 | 2.4743812302  |
| H  | 1.675971845   | -2.5285422682 | 1.0264418375  |
| H  | 3.4159751467  | -2.1698306093 | 0.9441785893  |
| C  | 4.2941464182  | 0.0337299616  | -0.7605851887 |
| H  | 4.8726239466  | -0.1292699453 | -1.68042182   |
| H  | 4.6131659925  | 0.991312457   | -0.341499758  |
| H  | 4.5799386401  | -0.7548966107 | -0.0601893572 |
| C  | 2.5214232183  | 1.0140548271  | -2.236970364  |
| H  | 3.0696937775  | 0.6878575784  | -3.1306714987 |
| H  | 1.4587484936  | 1.0555667061  | -2.4978003916 |
| H  | 2.8649741331  | 2.0237784833  | -2.0018653235 |
| C  | 2.4375816538  | -1.3849253656 | -1.6934084922 |
| H  | 3.0419144795  | -1.5444033144 | -2.5970043889 |
| H  | 2.641828762   | -2.2128924581 | -1.0142249937 |
| H  | 1.3801338257  | -1.4322906839 | -1.9732725973 |
| Br | -3.1665542433 | 0.6616028707  | -1.9475653846 |
| H  | -3.7256755599 | 0.4349936994  | 0.9925742745  |

| <b>3<sub>tBu</sub><sup>†</sup></b> | <b>[Pd(PhBr)L]<sup>‡</sup> <i>ipso</i></b> |               |               |
|------------------------------------|--------------------------------------------|---------------|---------------|
| Pd                                 | -0.6530421319                              | -0.2257818544 | -0.1264649742 |
| P                                  | 1.4010207976                               | 0.7460564296  | 0.4600458569  |
| C                                  | 1.2034083415                               | 2.6336586283  | 0.908191904   |
| C                                  | 2.1807862114                               | -0.1693508885 | 1.9977256918  |
| C                                  | 2.6455027872                               | 0.5979856536  | -1.0345452222 |
| C                                  | -2.613766486                               | -2.1141743222 | 0.4267692334  |
| C                                  | -3.3563946083                              | -1.6539152248 | 1.5116650554  |
| C                                  | -3.9203315516                              | -0.3678722755 | 1.50300102    |
| C                                  | -3.7025387111                              | 0.4792588085  | 0.4213557253  |
| C                                  | -2.9552602761                              | 0.0480667186  | -0.695839509  |
| C                                  | -2.429926761                               | -1.2714275228 | -0.7017455871 |
| H                                  | -2.2248938318                              | -3.1265492236 | 0.4065285219  |
| H                                  | -3.50875251                                | -2.3099483286 | 2.3645241541  |
| H                                  | -4.520783709                               | -0.0335673267 | 2.344116492   |
| C                                  | 0.5171149181                               | 2.7542866117  | 2.2868625863  |
| H                                  | 0.2315048651                               | 3.802884308   | 2.4436813279  |
| H                                  | -0.3948435028                              | 2.1504959525  | 2.3385892867  |
| H                                  | 1.171889597                                | 2.4744278189  | 3.1151635023  |
| C                                  | 2.5024908346                               | 3.4641516756  | 0.9348970593  |
| H                                  | 3.2419125861                               | 3.0684213435  | 1.6355805943  |
| H                                  | 2.2652052548                               | 4.4884943883  | 1.2538135684  |
| H                                  | 2.9719762211                               | 3.5379845319  | -0.0493460058 |
| C                                  | 0.2199612227                               | 3.2688659064  | -0.1046451817 |
| H                                  | -0.0078548673                              | 4.2929577628  | 0.2216341057  |
| H                                  | 0.6210976609                               | 3.3313266641  | -1.1167552883 |
| H                                  | -0.716328018                               | 2.7031188917  | -0.1471342199 |
| C                                  | 1.0523844569                               | -0.4273942365 | 3.0262798342  |
| H                                  | 1.4495690447                               | -1.0624551512 | 3.8301997575  |
| H                                  | 0.6725654194                               | 0.4837223324  | 3.488866061   |
| H                                  | 0.2066955662                               | -0.9464553907 | 2.5632437878  |
| C                                  | 3.3471580444                               | 0.5507757741  | 2.7047197822  |
| H                                  | 3.0387103466                               | 1.4905088799  | 3.1701363007  |
| H                                  | 4.1833243768                               | 0.7623889146  | 2.0334838968  |

|    |               |               |               |
|----|---------------|---------------|---------------|
| H  | 3.7285024388  | -0.0934556241 | 3.5090429772  |
| C  | 2.6657833318  | -1.5674356964 | 1.5542029719  |
| H  | 2.9173748419  | -2.1503052478 | 2.4501008617  |
| H  | 1.8860453008  | -2.1136219314 | 1.0126763705  |
| H  | 3.563566647   | -1.5309308278 | 0.9332614942  |
| C  | 4.1353161569  | 0.81504238    | -0.7034422064 |
| H  | 4.7187627843  | 0.7596140171  | -1.6327203575 |
| H  | 4.3321798422  | 1.7915270724  | -0.253540266  |
| H  | 4.5305748401  | 0.0468143284  | -0.0340558064 |
| C  | 2.2371456448  | 1.6013113897  | -2.1360954496 |
| H  | 2.8127044534  | 1.3753945804  | -3.0434293531 |
| H  | 1.1752496164  | 1.5145570762  | -2.3887860175 |
| H  | 2.4521337549  | 2.6387316812  | -1.8705418304 |
| C  | 2.467877913   | -0.80491233   | -1.666026786  |
| H  | 3.0741366712  | -0.8576147625 | -2.5808776696 |
| H  | 2.7901524587  | -1.6175719201 | -1.0146346766 |
| H  | 1.4224610461  | -0.985471199  | -1.9383438777 |
| H  | -4.1347098905 | 1.4764441307  | 0.4078873618  |
| Br | -1.9765407155 | -2.1096606812 | -2.4096538404 |
| H  | -2.9268469745 | 0.6498486611  | -1.5977652086 |

| <b>5<sub>tBu</sub></b> | <b>[Pd(Ph)(Br)L] <i>trans</i> halide</b> |               |               |
|------------------------|------------------------------------------|---------------|---------------|
| Pd                     | -1.0319201598                            | -0.2446856683 | -0.0356557137 |
| Br                     | -3.4560327351                            | -0.5121331261 | -0.1690216843 |
| P                      | 1.3065342725                             | -0.6331190747 | 0.0201780616  |
| C                      | 1.3448644473                             | -2.3298499284 | 0.9774053261  |
| C                      | 1.9225853673                             | -0.9364076656 | -1.8034019446 |
| C                      | 2.5024201525                             | 0.6227274236  | 0.8935169288  |
| C                      | -1.4067910158                            | 4.5189379531  | 0.2082906208  |
| C                      | -1.077565946                             | 3.918390687   | -1.00699266   |
| C                      | -0.9397111188                            | 2.5271694759  | -1.1006961627 |
| C                      | -1.1231357087                            | 1.7348734565  | 0.0354841749  |
| C                      | -1.4822450547                            | 2.3285189753  | 1.2516908207  |
| C                      | -1.6138400558                            | 3.7193615705  | 1.3338547709  |
| H                      | -1.5160958649                            | 5.5979585442  | 0.2747597092  |
| H                      | -0.934608709                             | 4.5263513537  | -1.8973530529 |
| H                      | -0.7053299806                            | 2.08114593    | -2.060424299  |
| H                      | -1.6786468396                            | 1.718459006   | 2.1276748992  |
| H                      | -1.8955126752                            | 4.170712145   | 2.2822161346  |
| C                      | 0.0823633971                             | -3.1284241128 | 0.5628809064  |
| H                      | 0.0435639777                             | -4.0547423544 | 1.1515036748  |
| H                      | -0.8439226145                            | -2.580149589  | 0.791733054   |
| H                      | 0.0625472636                             | -3.4104652122 | -0.4888438456 |
| C                      | 1.2017070008                             | -2.0817077712 | 2.4956160725  |
| H                      | 1.0371759788                             | -3.0495102445 | 2.9864975327  |
| H                      | 2.0963947903                             | -1.6436359519 | 2.9430516417  |
| H                      | 0.3413637015                             | -1.4460102649 | 2.7276463164  |
| C                      | 1.819069097                              | 1.1638607237  | 2.1712476284  |
| H                      | 2.4887445647                             | 1.9056477584  | 2.6263682895  |
| H                      | 0.8765503574                             | 1.6636810648  | 1.9421262966  |
| H                      | 1.6296597831                             | 0.3967423512  | 2.9214910593  |
| C                      | 2.7303886197                             | 1.8488385647  | -0.0201365646 |
| H                      | 3.2772214703                             | 2.604618214   | 0.5581991223  |
| H                      | 3.3361118472                             | 1.622153691   | -0.9004407549 |
| H                      | 1.788767082                              | 2.302231459   | -0.3421314361 |
| C                      | 3.8746912639                             | 0.0316004562  | 1.2798599257  |
| H                      | 4.4197307383                             | -0.3817001431 | 0.4286030557  |

|   |              |               |               |
|---|--------------|---------------|---------------|
| H | 3.7939187076 | -0.74458518   | 2.0446707358  |
| H | 4.4909364439 | 0.8355262783  | 1.7036952774  |
| C | 2.5956073968 | -3.2011028175 | 0.7428854267  |
| H | 2.695029051  | -3.5287095843 | -0.2943534254 |
| H | 2.5127134876 | -4.1067649644 | 1.3587566417  |
| H | 3.5207869604 | -2.6959183999 | 1.0312175553  |
| C | 1.4433580701 | 0.2475971493  | -2.6750140228 |
| H | 1.7902231019 | 0.0854239613  | -3.7041104433 |
| H | 0.3510337713 | 0.2924423544  | -2.6930896678 |
| H | 1.8208901965 | 1.2167039041  | -2.3491187196 |
| C | 1.2320868145 | -2.1847789981 | -2.398414892  |
| H | 1.4666265053 | -2.2239544876 | -3.4699010966 |
| H | 1.5781362855 | -3.1239214089 | -1.9617352378 |
| H | 0.1421278265 | -2.1308403721 | -2.3085607489 |
| C | 3.448547793  | -1.0985763649 | -1.9626020687 |
| H | 3.856703894  | -1.9121462297 | -1.3576841196 |
| H | 3.6673755574 | -1.3317319701 | -3.0130457659 |
| H | 3.9948392098 | -0.1841980463 | -1.7190132465 |

| <b>5<sub>tBu</sub></b> | [Pd(Ph)(Br)L] | <i>trans</i> aryl |               |
|------------------------|---------------|-------------------|---------------|
| Pd                     | -0.8556524742 | 0.0157110668      | -0.0072303534 |
| Br                     | -1.406852101  | -2.3727819754     | -0.0000996123 |
| P                      | 1.6193362913  | 0.2428172459      | -0.0032395545 |
| C                      | 2.3109600404  | 0.086285892       | 1.8041894581  |
| C                      | 2.5784733234  | -0.9724935054     | -1.1706259045 |
| C                      | 1.8752344495  | 2.0682851947      | -0.6258741061 |
| C                      | -5.3420025081 | 1.477445333       | 0.0005997657  |
| C                      | -4.7190540557 | 1.164305524       | -1.2101786275 |
| C                      | -3.4563995771 | 0.5608983047      | -1.2176554809 |
| C                      | -2.801592811  | 0.3161529542      | -0.0035180314 |
| C                      | -3.4449175705 | 0.5778598501      | 1.2132464364  |
| C                      | -4.7075908506 | 1.1812402679      | 1.2096075565  |
| H                      | -6.3292078222 | 1.9320386479      | 0.002143567   |
| H                      | -5.2212658802 | 1.3715192626      | -2.1522212316 |
| H                      | -2.9904387069 | 0.2862735911      | -2.160721947  |
| H                      | -2.9702937736 | 0.3164804032      | 2.1558052672  |
| H                      | -5.2006529045 | 1.4016406493      | 2.1534964322  |
| C                      | 1.7092786112  | -1.1935281145     | 2.4358361074  |
| H                      | 2.0029851491  | -1.2284819053     | 3.4935842887  |
| H                      | 0.6163956753  | -1.1941798893     | 2.3858968445  |
| H                      | 2.0599017257  | -2.1133465334     | 1.9690838674  |
| C                      | 1.7864615598  | 1.260878696       | 2.6603762416  |
| H                      | 2.0469610199  | 1.0663167924      | 3.708712207   |
| H                      | 2.2317715185  | 2.2215340599      | 2.3926517261  |
| H                      | 0.6958889218  | 1.3511521014      | 2.6083665857  |
| C                      | 0.7297895131  | 2.9155511651      | -0.0169332999 |
| H                      | 0.7745409939  | 3.9329387509      | -0.4282987029 |
| H                      | -0.257955517  | 2.5093131824      | -0.2871122587 |
| H                      | 0.7728961423  | 2.9973385068      | 1.0687785738  |
| C                      | 1.6695673792  | 2.1365259035      | -2.1563234324 |
| H                      | 1.6412144214  | 3.1927419855      | -2.4549092529 |
| H                      | 2.4777667064  | 1.66536885        | -2.7191259824 |
| H                      | 0.7208024081  | 1.6840988557      | -2.4639750661 |
| C                      | 3.229862776   | 2.7219871262      | -0.2896665241 |
| H                      | 4.0745403239  | 2.163435482       | -0.7018177696 |
| H                      | 3.3896497705  | 2.8328814719      | 0.7856324374  |
| H                      | 3.2602845875  | 3.7301916527      | -0.7249554216 |

|   |              |               |               |
|---|--------------|---------------|---------------|
| C | 3.8473081852 | 0.0401779015  | 1.9285206051  |
| H | 4.2773560516 | -0.8428234652 | 1.4499750468  |
| H | 4.1175156011 | -0.0078031817 | 2.9921492194  |
| H | 4.3324000829 | 0.925381861   | 1.5087146123  |
| C | 1.7289634803 | -1.1734277602 | -2.4499149583 |
| H | 2.2159068376 | -1.9361878834 | -3.0719024477 |
| H | 0.7239418417 | -1.5309526094 | -2.2069976419 |
| H | 1.6377913769 | -0.2722146155 | -3.0572092435 |
| C | 2.6704641513 | -2.3649974304 | -0.5060184281 |
| H | 3.0606712857 | -3.07149657   | -1.2501093061 |
| H | 3.356130994  | -2.3874510278 | 0.3442185139  |
| H | 1.6901997694 | -2.7312084796 | -0.1875126538 |
| C | 4.0001555909 | -0.5211611436 | -1.5620844002 |
| H | 4.6526972673 | -0.3862755668 | -0.6952293999 |
| H | 4.4543665413 | -1.2950703119 | -2.1953903744 |
| H | 4.0052604422 | 0.4073303543  | -2.1385423504 |

| <b>5<sub>tBu</sub></b> | [Pd(Ph)(Br)L] <sup>‡</sup> | “Y”           |               |
|------------------------|----------------------------|---------------|---------------|
| Pd                     | -0.7031496447              | -0.5390558745 | -0.0786722914 |
| Br                     | -1.3306630624              | -2.8446179732 | -0.523024911  |
| P                      | 1.5380235303               | 0.6662411894  | 0.0698503392  |
| C                      | 2.1504829953               | 0.7335481659  | 1.9123555911  |
| C                      | 2.8608056765               | -0.2603548576 | -1.016218397  |
| C                      | 1.311120249                | 2.4762043767  | -0.5984991258 |
| C                      | -5.1782889257              | 0.8115740703  | 0.4250398417  |
| C                      | -4.6126681474              | 0.7506447738  | -0.8506827861 |
| C                      | -3.340205009               | 0.1974332751  | -1.0363216764 |
| C                      | -2.6275301309              | -0.2487502126 | 0.0804293926  |
| C                      | -3.202384662               | -0.2476445513 | 1.3546604747  |
| C                      | -4.4761042703              | 0.308164573   | 1.5226528641  |
| H                      | -6.1718183317              | 1.2302738801  | 0.5603163495  |
| H                      | -5.1657487621              | 1.1165161063  | -1.7123992549 |
| H                      | -2.9158660771              | 0.1199363657  | -2.0329530871 |
| H                      | -2.67166808                | -0.6683376053 | 2.2037791403  |
| H                      | -4.9225381085              | 0.3284652789  | 2.5139056597  |
| C                      | 1.8780692875               | -0.6499867413 | 2.5529120002  |
| H                      | 2.1279559445               | -0.5956409299 | 3.6209991038  |
| H                      | 0.8225982107               | -0.9285942462 | 2.4656980994  |
| H                      | 2.4713679821               | -1.4548952569 | 2.1200298275  |
| C                      | 1.2844378001               | 1.736581148   | 2.7064880941  |
| H                      | 1.5210283284               | 1.6274136485  | 3.7726406338  |
| H                      | 1.4782957185               | 2.7780644617  | 2.4404147992  |
| H                      | 0.2142322368               | 1.5356636574  | 2.5879091918  |
| C                      | -0.0334244126              | 3.0202690629  | -0.0555396752 |
| H                      | -0.2131699653              | 4.0108890926  | -0.4942383333 |
| H                      | -0.8723329365              | 2.3754342134  | -0.3415587727 |
| H                      | -0.0527617616              | 3.1369811832  | 1.0277563116  |
| C                      | 1.1559932356               | 2.4447804369  | -2.1352623609 |
| H                      | 0.8560421929               | 3.4459942454  | -2.4707447097 |
| H                      | 2.0837598819               | 2.1969828536  | -2.6547642346 |
| H                      | 0.3767679165               | 1.7446888442  | -2.4537534707 |
| C                      | 2.4404326375               | 3.4643306254  | -0.2416046019 |
| H                      | 3.4167003429               | 3.1363732269  | -0.6081908239 |
| H                      | 2.5216550806               | 3.6380902264  | 0.8343148753  |
| H                      | 2.2246454142               | 4.4352174526  | -0.7078458274 |
| C                      | 3.6346861054               | 1.1034258128  | 2.1088713844  |
| H                      | 4.3113384569               | 0.3594282692  | 1.6809385294  |

|   |              |               |               |
|---|--------------|---------------|---------------|
| H | 3.8504021028 | 1.1515144815  | 3.1848134416  |
| H | 3.8864928451 | 2.0781497251  | 1.6822714658  |
| C | 2.1746567946 | -0.7135055649 | -2.3281136108 |
| H | 2.8931295888 | -1.3103975696 | -2.9055670565 |
| H | 1.3019368983 | -1.3432395913 | -2.1281045049 |
| H | 1.8576620066 | 0.1139333616  | -2.9628388065 |
| C | 3.2923247291 | -1.5605727882 | -0.3020778328 |
| H | 3.9028841666 | -2.1468179102 | -1.0007309721 |
| H | 3.9044124098 | -1.3800237493 | 0.5842863088  |
| H | 2.4338358414 | -2.1793993802 | -0.0218200016 |
| C | 4.1220487665 | 0.5593814322  | -1.3554830137 |
| H | 4.6499867776 | 0.9123366487  | -0.4658807188 |
| H | 4.8179200044 | -0.0781144264 | -1.9172934055 |
| H | 3.9018752457 | 1.4245566709  | -1.9859869284 |

| <b>3<sub>tBu</sub></b> | <b>[Pd(PhCl)L]</b> | <b><math>\eta^2</math>-meta-para</b> |
|------------------------|--------------------|--------------------------------------|
| Pd                     | -0.5337256335      | 0.9025780153 0.                      |
| P                      | -0.5698270918      | -1.4246754784 0.                     |
| C                      | 0.3377284993       | -2.1096112373 1.6035855533           |
| C                      | -2.4413532738      | -2.0245946444 0.                     |
| C                      | 0.3377284993       | -2.1096112373 -1.6035855533          |
| C                      | -0.6992499423      | 3.0928722296 0.                      |
| C                      | 0.0225102051       | 3.1459391549 1.217803529             |
| C                      | 1.4113370027       | 3.3258708866 1.2181665208            |
| C                      | 2.0830313856       | 3.4370798346 0.                      |
| C                      | 1.4113370027       | 3.3258708866 -1.2181665208           |
| C                      | 0.0225102051       | 3.1459391549 -1.217803529            |
| H                      | -1.7848025027      | 3.1720924861 0.                      |
| H                      | -0.5126151433      | 3.1311493215 2.1623254222            |
| H                      | 1.9599382211       | 3.3919526787 2.1515724757            |
| H                      | 1.9599382211       | 3.3919526787 -2.1515724757           |
| H                      | -0.5126151433      | 3.1311493215 -2.1623254222           |
| C                      | -0.3510923738      | -1.5006559498 2.8481403566           |
| H                      | 0.313531863        | -1.6276624803 3.7125435767           |
| H                      | -0.5414914088      | -0.4292845416 2.7227482231           |
| H                      | -1.2896211278      | -1.9971384887 3.0973463019           |
| C                      | 0.404399834        | -3.6371436692 1.7901606861           |
| H                      | -0.5835686866      | -4.0960612855 1.876146685            |
| H                      | 0.9434228957       | -3.8569839971 2.7223107              |
| H                      | 0.9440351135       | -4.1381408462 0.983151433            |
| C                      | 1.7834057628       | -1.5563764832 1.6129401487           |
| H                      | 2.19457293         | -1.6713492949 2.6243163963           |
| H                      | 2.4480628043       | -2.0989146741 0.9398032612           |
| H                      | 1.8141168015       | -0.4924348982 1.3550861698           |
| C                      | -3.1470725394      | -1.4112125853 1.2330973233           |
| H                      | -4.2327372208      | -1.4851287577 1.0876718611           |
| H                      | -2.9167207623      | -1.9394653267 2.1588422643           |
| H                      | -2.8939258452      | -0.3528917108 1.35979917             |
| C                      | -2.701535808       | -3.5425150272 0.                     |
| H                      | -2.2969948383      | -4.0394612566 0.8849081956           |
| H                      | -2.2969948383      | -4.0394612566 -0.8849081956          |
| H                      | -3.7864531158      | -3.7183556097 0.                     |
| C                      | -3.1470725394      | -1.4112125853 -1.2330973233          |
| H                      | -4.2327372208      | -1.4851287577 -1.0876718611          |
| H                      | -2.8939258452      | -0.3528917108 -1.35979917            |
| H                      | -2.9167207623      | -1.9394653267 -2.1588422643          |
| C                      | 0.404399834        | -3.6371436692 -1.7901606861          |

|    |               |               |               |
|----|---------------|---------------|---------------|
| H  | 0.9434228957  | -3.8569839971 | -2.7223107    |
| H  | 0.9440351135  | -4.1381408462 | -0.983151433  |
| H  | -0.5835686866 | -4.0960612855 | -1.876146685  |
| C  | 1.7834057628  | -1.5563764832 | -1.6129401487 |
| H  | 2.19457293    | -1.6713492949 | -2.6243163963 |
| H  | 1.8141168015  | -0.4924348982 | -1.3550861698 |
| H  | 2.4480628043  | -2.0989146741 | -0.9398032612 |
| C  | -0.3510923738 | -1.5006559498 | -2.8481403566 |
| H  | 0.313531863   | -1.6276624803 | -3.7125435767 |
| H  | -1.2896211278 | -1.9971384887 | -3.0973463019 |
| H  | -0.5414914088 | -0.4292845416 | -2.7227482231 |
| Cl | 3.8229458285  | 3.7025095267  | 0.            |

| <b>3<sub>tBu</sub></b> | <b>[Pd(PhCl)L]</b> | <b><math>\eta^2</math>-ortho-meta</b> |
|------------------------|--------------------|---------------------------------------|
| Pd                     | -0.7431150         | -0.5397760 -0.5068890                 |
| P                      | 1.4456430          | 0.0603680 0.0432890                   |
| C                      | 1.9226130          | -0.6187110 1.8070170                  |
| C                      | 2.7044700          | -0.6746940 -1.2525130                 |
| C                      | 1.6545300          | 2.0004260 0.0614420                   |
| C                      | -2.6777280         | -1.4936570 -1.0836020                 |
| C                      | -3.0738480         | -2.2737730 0.0323950                  |
| C                      | -3.7552570         | -1.6868810 1.0909250                  |
| C                      | -4.0517760         | -0.3120220 1.0785850                  |
| C                      | -3.6341240         | 0.4602640 0.0055930                   |
| C                      | -2.9414570         | -0.0996950 -1.0920210                 |
| H                      | -2.3443310         | -1.9863960 -1.9946470                 |
| H                      | -2.8743800         | -3.3414360 0.0323200                  |
| H                      | -4.0754590         | -2.2905770 1.9355750                  |
| H                      | -2.7977570         | 0.4929220 -1.9895240                  |
| C                      | 2.1142600          | -2.1499550 1.7287600                  |
| H                      | 2.1861010          | -2.5441860 2.7511470                  |
| H                      | 1.2625420          | -2.6395380 1.2448910                  |
| H                      | 3.0294390          | -2.4430530 1.2091210                  |
| C                      | 3.1778720          | -0.0029820 2.4590390                  |
| H                      | 4.0748470          | -0.1186520 1.8450540                  |
| H                      | 3.3692310          | -0.5090620 3.4154570                  |
| H                      | 3.0534620          | 1.0599400 2.6810600                   |
| C                      | 0.7100530          | -0.4010350 2.7455900                  |
| H                      | 0.9205190          | -0.8847740 3.7094680                  |
| H                      | 0.5016880          | 0.6498960 2.9468670                   |
| H                      | -0.1968450         | -0.8479170 2.3248270                  |
| C                      | 2.2562750          | -2.1187480 -1.5870350                 |
| H                      | 2.8829460          | -2.5015030 -2.4044860                 |
| H                      | 2.3554360          | -2.8091080 -0.7492760                 |
| H                      | 1.2117030          | -2.1362310 -1.9167510                 |
| C                      | 4.1871270          | -0.6956700 -0.8280340                 |
| H                      | 4.3678040          | -1.3520300 0.0271070                  |
| H                      | 4.5704470          | 0.2974790 -0.5804070                  |
| H                      | 4.7917230          | -1.0812700 -1.6606460                 |
| C                      | 2.5854670          | 0.1087970 -2.5785820                  |
| H                      | 3.1487630          | -0.4295790 -3.3524210                 |
| H                      | 1.5450710          | 0.1772330 -2.9132810                  |
| H                      | 3.0033150          | 1.1163470 -2.5216480                  |
| C                      | 3.1038760          | 2.5269920 0.0289880                   |
| H                      | 3.0848650          | 3.6237110 0.0924770                   |
| H                      | 3.7066520          | 2.1642570 0.8655570                   |
| H                      | 3.6215970          | 2.2715820 -0.8987360                  |

|    |            |           |            |
|----|------------|-----------|------------|
| C  | 0.9527540  | 2.5802890 | 1.3097390  |
| H  | 0.9119570  | 3.6728360 | 1.2075740  |
| H  | -0.0767620 | 2.2193390 | 1.4000530  |
| H  | 1.4851310  | 2.3662970 | 2.2392580  |
| C  | 0.8813290  | 2.5758090 | -1.1502110 |
| H  | 0.9004880  | 3.6726920 | -1.0900190 |
| H  | 1.3089870  | 2.2939980 | -2.1125860 |
| H  | -0.1634780 | 2.2493040 | -1.1362350 |
| H  | -4.5996490 | 0.1444660 | 1.8961520  |
| Cl | -4.0215310 | 2.1775680 | -0.0289520 |

|                                                                 |            |            |            |
|-----------------------------------------------------------------|------------|------------|------------|
| <b>3<sub>tBu</sub></b> [Pd(PhCl)L] $\eta^2$ - <i>ipso-ortho</i> |            |            |            |
| Pd                                                              | -0.9476110 | -0.1462210 | 0.0843390  |
| P                                                               | 1.3842590  | 0.0264460  | -0.0141300 |
| C                                                               | 1.9353660  | 1.8300110  | -0.5091140 |
| C                                                               | 2.1896670  | -0.4093240 | 1.7082040  |
| C                                                               | 2.0894430  | -1.2148160 | -1.3438540 |
| C                                                               | -2.9650530 | 0.2113280  | 1.2123990  |
| C                                                               | -3.2500860 | 1.5960980  | 1.2050260  |
| C                                                               | -3.6440540 | 2.2369660  | 0.0359570  |
| C                                                               | -3.7234780 | 1.5153950  | -1.1673170 |
| C                                                               | -3.4508640 | 0.1513950  | -1.1981320 |
| C                                                               | -3.0926030 | -0.5187840 | 0.0013610  |
| H                                                               | -2.8367040 | -0.3154310 | 2.1521930  |
| H                                                               | -3.1884970 | 2.1460680  | 2.1402850  |
| H                                                               | -3.8849700 | 3.2959700  | 0.0502200  |
| C                                                               | 1.7067150  | 2.7777110  | 0.6890600  |
| H                                                               | 1.8260340  | 3.8126420  | 0.3418810  |
| H                                                               | 0.6937630  | 2.6780640  | 1.0925450  |
| H                                                               | 2.4255210  | 2.6269220  | 1.4977040  |
| C                                                               | 3.3915760  | 1.9911290  | -0.9888610 |
| H                                                               | 4.1204340  | 1.6546300  | -0.2474350 |
| H                                                               | 3.5885680  | 3.0546650  | -1.1821660 |
| H                                                               | 3.5861680  | 1.4571080  | -1.9221080 |
| C                                                               | 0.9776060  | 2.3282570  | -1.6188710 |
| H                                                               | 1.1945960  | 3.3860230  | -1.8223490 |
| H                                                               | 1.0850820  | 1.7866330  | -2.5589390 |
| H                                                               | -0.0664160 | 2.2441820  | -1.2993800 |
| C                                                               | 1.3451070  | 0.2609670  | 2.8192640  |
| H                                                               | 1.7283890  | -0.0655340 | 3.7958490  |
| H                                                               | 1.3874790  | 1.3501200  | 2.7997270  |
| H                                                               | 0.2943740  | -0.0366720 | 2.7439840  |
| C                                                               | 3.6665450  | -0.0036110 | 1.8911580  |
| H                                                               | 3.8075970  | 1.0804820  | 1.8804830  |
| H                                                               | 4.3218170  | -0.4387140 | 1.1326430  |
| H                                                               | 4.0163200  | -0.3611330 | 2.8695330  |
| C                                                               | 2.0642030  | -1.9291760 | 1.9576410  |
| H                                                               | 2.3351890  | -2.1333000 | 3.0020500  |
| H                                                               | 1.0375710  | -2.2795090 | 1.8078380  |
| H                                                               | 2.7336430  | -2.5241630 | 1.3323090  |
| C                                                               | 3.6020520  | -1.5080190 | -1.2684020 |
| H                                                               | 3.8775340  | -2.1729500 | -2.0986300 |
| H                                                               | 4.2132280  | -0.6061120 | -1.3576250 |
| H                                                               | 3.8850130  | -2.0195330 | -0.3449630 |
| C                                                               | 1.7671170  | -0.6857740 | -2.7596010 |
| H                                                               | 1.9969010  | -1.4766690 | -3.4858230 |
| H                                                               | 0.7062810  | -0.4369960 | -2.8674850 |

|    |            |            |            |
|----|------------|------------|------------|
| H  | 2.3623290  | 0.1866330  | -3.0382870 |
| C  | 1.3105450  | -2.5469620 | -1.2143040 |
| H  | 1.6104970  | -3.2108460 | -2.0367370 |
| H  | 1.5062950  | -3.0755300 | -0.2813420 |
| H  | 0.2301350  | -2.3815170 | -1.2841950 |
| H  | -4.0134160 | 2.0184600  | -2.0857630 |
| H  | -3.5628690 | -0.4230290 | -2.1116390 |
| Cl | -3.2770870 | -2.2934250 | 0.0593120  |

|                                                |            |            |            |
|------------------------------------------------|------------|------------|------------|
| <b>3<sub>tBu</sub></b> [Pd(PhCl)L] <i>ipso</i> |            |            |            |
| Pd                                             | -0.9481140 | 0.1595320  | 0.0692380  |
| P                                              | 1.3828280  | -0.0215400 | -0.0140000 |
| C                                              | 2.1881280  | 1.7482010  | -0.1574270 |
| C                                              | 2.0796620  | -0.8791290 | 1.5927990  |
| C                                              | 1.9438950  | -1.0760510 | -1.5580770 |
| C                                              | 2.0723880  | 2.4769960  | 1.2001310  |
| H                                              | 2.3519470  | 3.5289440  | 1.0546700  |
| H                                              | 1.0463820  | 2.4590490  | 1.5819030  |
| H                                              | 2.7403190  | 2.0718820  | 1.9636360  |
| C                                              | 3.6616690  | 1.7906210  | -0.6088780 |
| H                                              | 4.3224030  | 1.2177080  | 0.0468180  |
| H                                              | 4.0094090  | 2.8327310  | -0.5936970 |
| H                                              | 3.7979790  | 1.4261090  | -1.6300840 |
| C                                              | 1.3308260  | 2.5790880  | -1.1439400 |
| H                                              | 1.6994830  | 3.6141120  | -1.1458380 |
| H                                              | 1.3751740  | 2.2154410  | -2.1707880 |
| H                                              | 0.2799040  | 2.5902190  | -0.8352540 |
| C                                              | 1.3061950  | -0.3157750 | 2.8094200  |
| H                                              | 1.6088430  | -0.8724020 | 3.7070970  |
| H                                              | 1.5042870  | 0.7395670  | 2.9976040  |
| H                                              | 0.2266150  | -0.4366390 | 2.6741680  |
| C                                              | 3.5932470  | -0.7248360 | 1.8453790  |
| H                                              | 3.8842730  | 0.3124830  | 2.0293140  |
| H                                              | 4.2003950  | -1.1071920 | 1.0210760  |
| H                                              | 3.8650880  | -1.2967550 | 2.7434620  |
| C                                              | 1.7423900  | -2.3863580 | 1.5498190  |
| H                                              | 1.9519430  | -2.8180570 | 2.5376180  |
| H                                              | 0.6831020  | -2.5561760 | 1.3309230  |
| H                                              | 2.3446920  | -2.9402040 | 0.8259340  |
| C                                              | 3.4015780  | -1.5792570 | -1.5510120 |
| H                                              | 3.6001150  | -2.1098520 | -2.4925510 |
| H                                              | 4.1294610  | -0.7673080 | -1.4759950 |
| H                                              | 3.5966910  | -2.2870860 | -0.7413060 |
| C                                              | 1.7198280  | -0.2491500 | -2.8441540 |
| H                                              | 1.8643840  | -0.9079850 | -3.7106180 |
| H                                              | 0.7003300  | 0.1471740  | -2.8984410 |
| H                                              | 2.4238890  | 0.5788650  | -2.9513740 |
| C                                              | 0.9913660  | -2.2909070 | -1.6772500 |
| H                                              | 1.1964120  | -2.8073510 | -2.6252390 |
| H                                              | 1.1185820  | -3.0204870 | -0.8770000 |
| H                                              | -0.0559660 | -1.9711710 | -1.6770840 |
| C                                              | -3.6213700 | -2.2484410 | 0.0424300  |
| C                                              | -3.2393740 | -1.5984940 | 1.2108160  |
| C                                              | -2.9662690 | -0.2119240 | 1.2129470  |
| C                                              | -3.0945910 | 0.5120600  | -0.0016580 |
| C                                              | -3.4383320 | -0.1667790 | -1.2002480 |
| C                                              | -3.6989770 | -1.5336340 | -1.1645680 |



|    |            |            |            |
|----|------------|------------|------------|
| H  | -3.8532410 | -3.3093700 | 0.0605070  |
| H  | -3.1773790 | -2.1438090 | 2.1487870  |
| H  | -2.8431020 | 0.3204220  | 2.1502860  |
| H  | -3.5519180 | 0.4024990  | -2.1167750 |
| H  | -3.9785210 | -2.0433990 | -2.0825460 |
| Cl | -3.2955720 | 2.2850180  | 0.0492150  |

**3<sub>tBu</sub>** [Pd(PhCl)L] via Cl

|    |               |               |               |
|----|---------------|---------------|---------------|
| P  | -1.7202303374 | 0.105752597   | -0.0010838268 |
| C  | -2.028582307  | 1.5045514076  | -1.3280135385 |
| C  | -2.9411736388 | -1.3699131557 | -0.3835535538 |
| C  | -2.1775258253 | 0.8289480779  | 1.7561840171  |
| C  | -2.0368708164 | 0.8734075327  | -2.7374381658 |
| H  | -2.0070320582 | 1.6806023529  | -3.481631297  |
| H  | -1.1586525769 | 0.2393544042  | -2.8979990052 |
| H  | -2.9360475074 | 0.2864564508  | -2.9373215238 |
| C  | -3.3150870684 | 2.3380473196  | -1.1571683294 |
| H  | -4.2200685212 | 1.7254730915  | -1.15697567   |
| H  | -3.3984854291 | 3.0424906717  | -1.9965122595 |
| H  | -3.3091709261 | 2.9348205727  | -0.2413669433 |
| C  | -0.8072315438 | 2.4553454383  | -1.3089608349 |
| H  | -0.9172889726 | 3.1876374189  | -2.1211213975 |
| H  | -0.7068714468 | 3.0124142517  | -0.3771391724 |
| H  | 0.1200614348  | 1.8956587958  | -1.4706904018 |
| C  | -2.3376682297 | -2.2066772721 | -1.5383006691 |
| H  | -2.9516874386 | -3.1073273129 | -1.6784075714 |
| H  | -2.3132429668 | -1.676690685  | -2.4909234582 |
| H  | -1.3145374469 | -2.5165185788 | -1.3007270601 |
| C  | -4.3874742988 | -0.9799505911 | -0.7519251073 |
| H  | -4.4472645799 | -0.4316162205 | -1.6959045485 |
| H  | -4.8744810556 | -0.3793527803 | 0.0203733026  |
| H  | -4.9830235651 | -1.8948806761 | -0.8775528163 |
| C  | -2.9862812349 | -2.318547518  | 0.8351576545  |
| H  | -3.5091606853 | -3.2384413682 | 0.5415723639  |
| H  | -1.9800620813 | -2.5983088907 | 1.1640467108  |
| H  | -3.5302127471 | -1.8991652965 | 1.6846705517  |
| C  | -3.6805505636 | 0.9978713508  | 2.0576066473  |
| H  | -3.7965036649 | 1.44737255    | 3.0536783891  |
| H  | -4.184730161  | 1.6552782717  | 1.3443519907  |
| H  | -4.212465647  | 0.043265651   | 2.0746052886  |
| C  | -1.4859492487 | 2.1988050838  | 1.9312642154  |
| H  | -1.5807234445 | 2.5072081659  | 2.981056994   |
| H  | -0.417614003  | 2.1412029944  | 1.6974871064  |
| H  | -1.9365851413 | 2.9870777251  | 1.3241742363  |
| C  | -1.5481906113 | -0.0918602075 | 2.8298114415  |
| H  | -1.6749116243 | 0.3777856495  | 3.8152603425  |
| H  | -2.0089088613 | -1.0786779236 | 2.8774909108  |
| H  | -0.477672928  | -0.2304358676 | 2.6449589548  |
| Pd | 0.4298821218  | -0.6257455302 | -0.0618526715 |
| C  | 3.9958046566  | -0.434069504  | -0.0586190847 |
| C  | 3.6914049277  | 0.9078869725  | 0.1534018438  |
| C  | 5.3060273523  | -0.8852601381 | -0.1994544965 |
| C  | 4.7425598789  | 1.8248613727  | 0.2250735815  |
| H  | 2.6539238295  | 1.2139956838  | 0.2564835366  |
| C  | 6.3432801321  | 0.0469512864  | -0.1246086632 |
| H  | 5.5110003089  | -1.9379505632 | -0.3641885615 |
| C  | 6.0653229081  | 1.399135228   | 0.0868115673  |

|    |              |               |               |
|----|--------------|---------------|---------------|
| H  | 4.5208048424 | 2.8756655739  | 0.3895643867  |
| H  | 7.3703691608 | -0.2901294509 | -0.2332162884 |
| H  | 6.8772484986 | 2.1183984645  | 0.1433459702  |
| Cl | 2.6803811517 | -1.6254928765 | -0.1525860878 |

**5<sub>tBu</sub>** [Pd(Ph)(Cl)L] *trans* halide

|    |            |            |            |
|----|------------|------------|------------|
| Pd | 0.7216810  | -1.1364220 | 0.0434070  |
| P  | -1.1842480 | 0.2416610  | -0.0220420 |
| C  | -2.3830770 | -0.9183480 | -1.0303160 |
| C  | -1.8839070 | 0.4296660  | 1.7876320  |
| C  | -1.1289640 | 1.9900400  | -0.8657910 |
| C  | 4.3891380  | 1.9307320  | -0.0496730 |
| C  | 3.6980750  | 1.7285030  | 1.1450110  |
| C  | 2.6025250  | 0.8564440  | 1.1958330  |
| C  | 2.1909240  | 0.1926270  | 0.0374570  |
| C  | 2.8978680  | 0.3689250  | -1.1579710 |
| C  | 3.9891730  | 1.2440700  | -1.1975410 |
| H  | 5.2404420  | 2.6052180  | -0.0828430 |
| H  | 4.0114650  | 2.2397240  | 2.0523780  |
| H  | 2.0947860  | 0.6977000  | 2.1399550  |
| H  | 2.6190230  | -0.1828430 | -2.0501080 |
| H  | 4.5329760  | 1.3733150  | -2.1302980 |
| C  | -2.0540980 | -2.3820460 | -0.6391500 |
| H  | -2.6730170 | -3.0564160 | -1.2460490 |
| H  | -1.0087310 | -2.6429640 | -0.8626250 |
| H  | -2.2500030 | -2.6140140 | 0.4068580  |
| C  | -2.0721150 | -0.8067640 | -2.5395560 |
| H  | -2.6196260 | -1.6014450 | -3.0623910 |
| H  | -2.3951420 | 0.1430000  | -2.9708980 |
| H  | -1.0075830 | -0.9477070 | -2.7516240 |
| C  | -0.2312110 | 1.9244840  | -2.1240410 |
| H  | -0.1942480 | 2.9295470  | -2.5648720 |
| H  | 0.7907410  | 1.6333030  | -1.8757010 |
| H  | -0.6060010 | 1.2481620  | -2.8917660 |
| C  | -0.4551180 | 3.0034490  | 0.0870420  |
| H  | -0.2932020 | 3.9363860  | -0.4679310 |
| H  | -1.0732220 | 3.2498530  | 0.9529400  |
| H  | 0.5219820  | 2.6550130  | 0.4333260  |
| C  | -2.5125120 | 2.5388210  | -1.2739980 |
| H  | -3.2100860 | 2.6067490  | -0.4366960 |
| H  | -2.9813260 | 1.9454910  | -2.0631310 |
| H  | -2.3796820 | 3.5532960  | -1.6725250 |
| C  | -3.8912980 | -0.6684020 | -0.8275320 |
| H  | -4.2219270 | -0.8698760 | 0.1940730  |
| H  | -4.4504780 | -1.3484950 | -1.4841530 |
| H  | -4.1891790 | 0.3504680  | -1.0873230 |
| C  | -0.7406990 | 0.9289350  | 2.7022800  |
| H  | -1.1355620 | 1.0415660  | 3.7206870  |
| H  | 0.0724470  | 0.1990460  | 2.7388650  |
| H  | -0.3241100 | 1.8901950  | 2.4026440  |
| C  | -2.2792250 | -0.9554410 | 2.3486940  |
| H  | -2.5011220 | -0.8383530 | 3.4170880  |
| H  | -3.1728910 | -1.3728430 | 1.8809600  |
| H  | -1.4632720 | -1.6809660 | 2.2662550  |
| C  | -3.0945200 | 1.3760000  | 1.9289180  |
| H  | -3.9332690 | 1.0938420  | 1.2877190  |
| H  | -3.4500870 | 1.3361260  | 2.9671670  |

|    |            |            |           |
|----|------------|------------|-----------|
| H  | -2.8390380 | 2.4176240  | 1.7206570 |
| Cl | 2.1652680  | -2.9429030 | 0.1346750 |

| $\mathbf{5_{tBu}}$ | $[\text{Pd}(\text{Ph})(\text{Cl})\text{L}] \text{ trans VS}$ |            |            |
|--------------------|--------------------------------------------------------------|------------|------------|
| Pd                 | -0.6584140                                                   | -1.1849850 | 0.0245620  |
| P                  | 0.9871710                                                    | 0.4340080  | 0.0124870  |
| C                  | 1.9531160                                                    | 0.2280720  | 1.6960960  |
| C                  | 2.1297330                                                    | -0.1420600 | -1.4727740 |
| C                  | 0.5640990                                                    | 2.3292410  | -0.2357450 |
| C                  | -4.8886870                                                   | 0.9179000  | -0.0113090 |
| C                  | -4.1939850                                                   | 0.7450500  | -1.2097940 |
| C                  | -2.8701650                                                   | 0.2899420  | -1.2022040 |
| C                  | -2.2373200                                                   | -0.0117410 | 0.0134970  |
| C                  | -2.9336050                                                   | 0.1758440  | 1.2183790  |
| C                  | -4.2572210                                                   | 0.6284140  | 1.2005980  |
| H                  | -5.9148110                                                   | 1.2752010  | -0.0210160 |
| H                  | -4.6795110                                                   | 0.9614680  | -2.1585440 |
| H                  | -2.3498930                                                   | 0.1496880  | -2.1462110 |
| H                  | -2.4546100                                                   | -0.0380260 | 2.1705830  |
| H                  | -4.7911440                                                   | 0.7572620  | 2.1391880  |
| C                  | 1.9523590                                                    | -1.2618770 | 2.1091070  |
| H                  | 2.4952360                                                    | -1.3477470 | 3.0598710  |
| H                  | 0.9392610                                                    | -1.6430250 | 2.2597010  |
| H                  | 2.4387760                                                    | -1.9163130 | 1.3877170  |
| C                  | 1.2136810                                                    | 0.9878590  | 2.8189460  |
| H                  | 1.6632980                                                    | 0.6999760  | 3.7775470  |
| H                  | 1.3058680                                                    | 2.0727880  | 2.7348230  |
| H                  | 0.1521290                                                    | 0.7246130  | 2.8643830  |
| C                  | -0.5960080                                                   | 2.7743050  | 0.6845560  |
| H                  | -0.7598770                                                   | 3.8467980  | 0.5149660  |
| H                  | -1.5231970                                                   | 2.2550330  | 0.4514780  |
| H                  | -0.3892520                                                   | 2.6438830  | 1.7458660  |
| C                  | 0.0719260                                                    | 2.5628430  | -1.6820510 |
| H                  | -0.2911620                                                   | 3.5960340  | -1.7535740 |
| H                  | 0.8576860                                                    | 2.4470590  | -2.4303520 |
| H                  | -0.7633120                                                   | 1.9071360  | -1.9392320 |
| C                  | 1.7587410                                                    | 3.2722500  | 0.0389600  |
| H                  | 2.6521540                                                    | 3.0325810  | -0.5387860 |
| H                  | 2.0281650                                                    | 3.3002840  | 1.0976520  |
| H                  | 1.4555980                                                    | 4.2904150  | -0.2381770 |
| C                  | 3.4154800                                                    | 0.7233020  | 1.6496020  |
| H                  | 4.0369540                                                    | 0.1350610  | 0.9711040  |
| H                  | 3.8454970                                                    | 0.6108420  | 2.6535130  |
| H                  | 3.5075330                                                    | 1.7758740  | 1.3755830  |
| C                  | 1.2202870                                                    | -0.4472020 | -2.6879400 |
| H                  | 1.8575250                                                    | -0.7707430 | -3.5213700 |
| H                  | 0.5249180                                                    | -1.2614200 | -2.4634400 |
| H                  | 0.6451710                                                    | 0.4147600  | -3.0293180 |
| C                  | 2.8516620                                                    | -1.4645740 | -1.1299010 |
| H                  | 3.3536780                                                    | -1.8117650 | -2.0421640 |
| H                  | 3.6252420                                                    | -1.3429070 | -0.3685210 |
| H                  | 2.1592490                                                    | -2.2506700 | -0.8193370 |
| C                  | 3.2028970                                                    | 0.8863490  | -1.8895620 |
| H                  | 3.8765860                                                    | 1.1534540  | -1.0715790 |
| H                  | 3.8163720                                                    | 0.4325110  | -2.6784110 |
| H                  | 2.7809440                                                    | 1.8037570  | -2.3041670 |
| Cl                 | -0.0449130                                                   | -3.4745970 | -0.0263340 |

| $\mathbf{5_{tBu}}$ | $[\text{Pd}(\text{Ph})(\text{Cl})\text{L}] \text{ trans aryl}$ |            |            |
|--------------------|----------------------------------------------------------------|------------|------------|
| Pd                 | -0.9663490                                                     | -0.2113110 | 0.0518380  |
| P                  | 1.4913240                                                      | 0.1377790  | -0.0236120 |
| C                  | 2.2436160                                                      | 0.2151270  | 1.7636330  |
| C                  | 2.4675020                                                      | -1.1631090 | -1.0767180 |
| C                  | 1.6416500                                                      | 1.8862390  | -0.8556260 |
| C                  | -5.5668490                                                     | 0.8441490  | -0.1208480 |
| C                  | -4.9678830                                                     | 0.2362110  | -1.2274900 |
| C                  | -3.6540340                                                     | -0.2375840 | -1.1471280 |
| C                  | -2.9277540                                                     | -0.0570300 | 0.0363100  |
| C                  | -3.5405320                                                     | 0.5031870  | 1.1648130  |
| C                  | -4.8558170                                                     | 0.9741420  | 1.0743000  |
| H                  | -6.5926120                                                     | 1.1978280  | -0.1839990 |
| H                  | -5.5273250                                                     | 0.1146700  | -2.1521190 |
| H                  | -3.2024690                                                     | -0.7402850 | -1.9982910 |
| H                  | -3.0032810                                                     | 0.5764970  | 2.1080870  |
| H                  | -5.3269050                                                     | 1.4248530  | 1.9446910  |
| C                  | 1.7220800                                                      | -1.0112490 | 2.5538010  |
| H                  | 2.0237880                                                      | -0.9004640 | 3.6039700  |
| H                  | 0.6310330                                                      | -1.0826040 | 2.5172410  |
| H                  | 2.1252910                                                      | -1.9585990 | 2.1980390  |
| C                  | 1.6863560                                                      | 1.4537670  | 2.5006000  |
| H                  | 1.9835380                                                      | 1.3913330  | 3.5553110  |
| H                  | 2.0762860                                                      | 2.3982100  | 2.1144830  |
| H                  | 0.5916560                                                      | 1.4867360  | 2.4737320  |
| C                  | 0.4758290                                                      | 2.7499740  | -0.3102740 |
| H                  | 0.4575540                                                      | 3.7092430  | -0.8447110 |
| H                  | -0.5005760                                                     | 2.2715070  | -0.4906150 |
| H                  | 0.5499460                                                      | 2.9685420  | 0.7547730  |
| C                  | 1.3889460                                                      | 1.7666150  | -2.3758290 |
| H                  | 1.3030690                                                      | 2.7784580  | -2.7931120 |
| H                  | 2.2021980                                                      | 1.2676930  | -2.9062210 |
| H                  | 0.4543120                                                      | 1.2407200  | -2.5976040 |
| C                  | 2.9739390                                                      | 2.6322300  | -0.6450730 |
| H                  | 3.8291270                                                      | 2.0622920  | -1.0180020 |
| H                  | 3.1604190                                                      | 2.8747540  | 0.4038900  |
| H                  | 2.9472470                                                      | 3.5825350  | -1.1958100 |
| C                  | 3.7832450                                                      | 0.2524930  | 1.8394820  |
| H                  | 4.2421600                                                      | -0.6565790 | 1.4432430  |
| H                  | 4.0857210                                                      | 0.3317510  | 2.8925350  |
| H                  | 4.2116480                                                      | 1.1085720  | 1.3110630  |
| C                  | 1.5882680                                                      | -1.5491780 | -2.2920860 |
| H                  | 2.0994940                                                      | -2.3461130 | -2.8484580 |
| H                  | 0.6173050                                                      | -1.9355860 | -1.9685840 |
| H                  | 1.4204570                                                      | -0.7259300 | -2.9874670 |
| C                  | 2.6407900                                                      | -2.4635480 | -0.2584510 |
| H                  | 3.0244270                                                      | -3.2400310 | -0.9331280 |
| H                  | 3.3642020                                                      | -2.3617940 | 0.5538400  |
| H                  | 1.6895500                                                      | -2.8201040 | 0.1473150  |
| C                  | 3.8549890                                                      | -0.7021820 | -1.5681500 |
| H                  | 4.5198010                                                      | -0.4173860 | -0.7481540 |
| H                  | 4.3336170                                                      | -1.5332230 | -2.1034730 |
| H                  | 3.7995520                                                      | 0.1366780  | -2.2669380 |
| Cl                 | -1.2490640                                                     | -2.5018860 | 0.3325010  |

$\mathbf{5_{tBu}^{\ddagger}}$   $[\text{Pd}(\text{Ph})(\text{Cl})\text{L}]^{\ddagger}$  “Y”

|    |               |               |               |
|----|---------------|---------------|---------------|
| Pd | 0.9371644533  | -0.6124170479 | 0.046829646   |
| P  | -1.4871163349 | 0.1695056573  | -0.0090209036 |
| C  | -2.4424679036 | -0.7220981105 | -1.4488797344 |
| C  | -2.380213432  | -0.1819851263 | 1.6797392562  |
| C  | -1.471323498  | 2.0843371437  | -0.3354024469 |
| C  | 5.180769448   | 1.4115507467  | -0.0672378513 |
| C  | 4.5238860617  | 1.2270759807  | 1.1516143978  |
| C  | 3.3320167345  | 0.4946847254  | 1.2092118266  |
| C  | 2.7898672298  | -0.0083805552 | 0.023532833   |
| C  | 3.4631265883  | 0.1185154176  | -1.1939812498 |
| C  | 4.6531155505  | 0.8543417299  | -1.2345450232 |
| H  | 6.1115806287  | 1.9710281954  | -0.1041848448 |
| H  | 4.9434822386  | 1.6369198091  | 2.067177326   |
| H  | 2.8389262364  | 0.324864701   | 2.1624116308  |
| H  | 3.0715234744  | -0.3442886263 | -2.0947537192 |
| H  | 5.1738765283  | 0.9743896496  | -2.1815123986 |
| C  | -2.0440366469 | -2.218236593  | -1.4196211931 |
| H  | -2.5075674317 | -2.7186374855 | -2.2802135577 |
| H  | -0.9594729496 | -2.3468488141 | -1.4957765335 |
| H  | -2.3774752236 | -2.7403578657 | -0.523542146  |
| C  | -1.9454873615 | -0.1863406854 | -2.8098451381 |
| H  | -2.3636134687 | -0.822422859  | -3.6006684197 |
| H  | -2.2700753907 | 0.8356125831  | -3.0173231908 |
| H  | -0.854938422  | -0.2375559057 | -2.8946694659 |
| C  | -0.3753799422 | 2.3811585392  | -1.3888654317 |
| H  | -0.3416075578 | 3.4647533516  | -1.56415503   |
| H  | 0.6146441445  | 2.0727696756  | -1.0326810627 |
| H  | -0.5497312085 | 1.8997355795  | -2.3506447191 |
| C  | -1.0253264456 | 2.8298910338  | 0.9428280685  |
| H  | -0.8434557547 | 3.8806239964  | 0.6818420654  |
| H  | -1.7809463014 | 2.8229363657  | 1.7316399828  |
| H  | -0.0895874788 | 2.4289234894  | 1.3460976572  |
| C  | -2.8093080353 | 2.6886170734  | -0.8088535862 |
| H  | -3.6271075618 | 2.5050129665  | -0.1069210041 |
| H  | -3.1141650308 | 2.3153811478  | -1.7896508296 |
| H  | -2.6949903698 | 3.7771047053  | -0.9012893934 |
| C  | -3.9789760812 | -0.595770984  | -1.4041259104 |
| H  | -4.4114665754 | -1.0563537169 | -0.5126708645 |
| H  | -4.4039650266 | -1.1182360275 | -2.2717950643 |
| H  | -4.3174412522 | 0.4430208444  | -1.4503232967 |
| C  | -1.3765366657 | 0.1155915243  | 2.8209487393  |
| H  | -1.8366928141 | -0.1768516396 | 3.7740499975  |
| H  | -0.4564773566 | -0.4663445101 | 2.7009049315  |
| H  | -1.105533184  | 1.1687415526  | 2.9021471543  |
| C  | -2.697753858  | -1.6901070529 | 1.7906021171  |
| H  | -3.050889106  | -1.8932559952 | 2.8098815638  |
| H  | -3.4869231805 | -2.012558148  | 1.1084449434  |
| H  | -1.8107867063 | -2.3097229891 | 1.6215615619  |
| C  | -3.6763618174 | 0.6181199595  | 1.9178705932  |
| H  | -4.4363982773 | 0.4236525072  | 1.1565777178  |
| H  | -4.1015463817 | 0.3295299823  | 2.8884368698  |
| H  | -3.497641958  | 1.6951537399  | 1.9508714908  |
| Cl | 1.8479990198  | -2.7308182071 | 0.1589375817  |

Table SI4b

Pd(PCy<sub>3</sub>) B3LYP-D2/BS1

Pd 0.0192204277 -0.1057449594 0.0490338517

|   |               |               |               |
|---|---------------|---------------|---------------|
| P | -1.392632701  | 0.1052559723  | -1.6396822682 |
| C | -2.7947461277 | 1.325082112   | -1.3219282643 |
| C | -4.0975564551 | 1.1231815734  | -2.1237699522 |
| C | -5.0972038431 | 2.2580831553  | -1.8401985747 |
| C | -5.4098282144 | 2.3596041108  | -0.3410893552 |
| C | -4.1196146185 | 2.5481899517  | 0.4702041662  |
| C | -3.111620686  | 1.4239566993  | 0.1851941885  |
| C | -0.5871969278 | 0.8044857517  | -3.188505459  |
| C | -1.3476922612 | 0.6094539609  | -4.5153032361 |
| C | -0.6239437312 | 1.3162747408  | -5.6753324515 |
| C | 0.8282856502  | 0.8369319623  | -5.80462122   |
| C | 1.5848531912  | 1.04529811    | -4.484647678  |
| C | 0.8770127191  | 0.33 51646507 | -3.3206273334 |
| C | -2.2803796594 | -1.4431353161 | -2.2221073961 |
| C | -3.1279300945 | -2.0903974677 | -1.0995904302 |
| C | -2.289656089  | -2.8391449271 | -0.051758123  |
| C | -1.3710166158 | -3.8798858731 | -0.7079823186 |
| C | -0.4799411967 | -3.2256683076 | -1.7737482586 |
| C | -1.3355347048 | -2.5063727309 | -2.8267473218 |
| H | -2.3609337374 | 2.2909045746  | -1.6251625425 |
| H | -4.5574598924 | 0.1688927665  | -1.838493712  |
| H | -3.8977279758 | 1.0699728164  | -3.1982994861 |
| H | -4.6646803835 | 3.209585183   | -2.184038044  |
| H | -6.017982241  | 2.0947578405  | -2.4155415583 |
| H | -5.9057937278 | 1.4325879811  | -0.0157421617 |
| H | -6.1088530061 | 3.1843298079  | -0.1510261536 |
| H | -3.6635896219 | 3.5126548293  | 0.1998509894  |
| H | -4.3437390918 | 2.58678149    | 1.5441295832  |
| H | -3.5272231928 | 0.4672723791  | 0.532058704   |
| H | -2.1790950589 | 1.5790401917  | 0.741034786   |
| H | -0.5550496803 | 1.8852891584  | -2.9797298338 |
| H | -2.3684774296 | 0.9953302041  | -4.4350751583 |
| H | -1.4256466087 | -0.4611091839 | -4.7425049738 |
| H | -1.1710732157 | 1.1481864338  | -6.61229143   |
| H | -0.6274456167 | 2.4006839944  | -5.4886012768 |
| H | 1.3322468864  | 1.3641889114  | -6.6249625742 |
| H | 0.8328071542  | -0.2343753111 | -6.0566244751 |
| H | 2.6175098423  | 0.6832704021  | -4.5714664323 |
| H | 1.6363319821  | 2.1231249452  | -4.2677775033 |
| H | 1.3971779631  | 0.517884516   | -2.3721682099 |
| H | 0.9060095307  | -0.7492343781 | -3.4913120947 |
| H | -2.9612507954 | -1.1062795385 | -3.0133475114 |
| H | -3.8077417976 | -2.8089589342 | -1.5829351642 |
| H | -3.7573505703 | -1.34296572   | -0.6051399297 |
| H | -1.6717952971 | -2.1159160548 | 0.4991913048  |
| H | -2.9608133721 | -3.3213181091 | 0.6714145534  |
| H | -1.9866148087 | -4.6594531786 | -1.1838759228 |
| H | -0.7547915839 | -4.3743624871 | 0.0540704687  |
| H | 0.1863384913  | -2.4979135468 | -1.2885436579 |
| H | 0.1484964591  | -3.9799788691 | -2.2653664405 |
| H | -1.9707911104 | -3.2534097881 | -3.3278956962 |
| H | -0.6977931838 | -2.0688338932 | -3.6004213633 |

Pd(PCy<sub>3</sub>) BP86/BS1

Pd 0.0023597684 -0.115836272 0.0363985424

P -1.4021607162 0.066160232 -1.6430864346

C -2.813420314 1.3178329334 -1.3212605251

|                                                 |               |               |               |   |               |               |               |
|-------------------------------------------------|---------------|---------------|---------------|---|---------------|---------------|---------------|
| C                                               | -4.1218002137 | 1.149519317   | -2.1313153331 | C | 2.2030463189  | -2.7334921754 | 0.6254119717  |
| C                                               | -5.1002166897 | 2.3140390404  | -1.8570724296 | C | 3.4058002724  | -3.4070657314 | 1.3164157065  |
| C                                               | -5.4111048649 | 2.4510405867  | -0.3557493993 | C | 3.2790945735  | -4.9384846874 | 1.2300872506  |
| C                                               | -4.115513623  | 2.5988285968  | 0.4646803117  | C | 3.155477383   | -5.4066501909 | -0.2282058703 |
| C                                               | -3.1320621956 | 1.4429852971  | 0.188982091   | C | 1.9725148106  | -4.7204090863 | -0.9285081474 |
| C                                               | -0.5918282772 | 0.7851800969  | -3.2144414538 | C | 2.0950878434  | -3.1918991074 | -0.841302946  |
| C                                               | -1.3390539949 | 0.5983624056  | -4.5563403144 | C | 4.7836021819  | -0.6803933118 | -0.1899811755 |
| C                                               | -0.6312415992 | 1.3618484258  | -5.6985880879 | C | 5.7911386738  | 0.2030733847  | -0.9453552717 |
| C                                               | 0.8462645831  | 0.9498219113  | -5.832109451  | C | 5.3779551978  | 0.3714554212  | -2.4161208024 |
| C                                               | 1.5900106851  | 1.1209559505  | -4.493887692  | C | 3.9520953808  | 0.9331434719  | -2.5301849483 |
| C                                               | 0.8893119687  | 0.3560966633  | -3.3527591108 | C | 2.9451195035  | 0.0606218785  | -7650712989   |
| C                                               | -2.2863562856 | -1.5262530831 | -2.1976550765 | C | 1.6374874355  | -1.2500496032 | 3.4788953684  |
| C                                               | -3.125331712  | -2.1700853171 | -1.0583808702 | C | 1.9964567532  | -0.9512905371 | 4.9425219974  |
| C                                               | -2.2740867368 | -2.9105239202 | -0.008906545  | C | 1.9839758483  | 0.5596013169  | 5.2127520893  |
| C                                               | -1.3653189163 | -3.9684268058 | -0.6611546865 | C | 2.9360858562  | 1.2871647597  | 4.252914587   |
| C                                               | -0.4804357999 | -3.3255652857 | -1.7450038445 | C | 2.585099472   | 0.9869290864  | 2.7865541115  |
| C                                               | -1.3338759975 | -2.594481733  | -2.7991081301 | C | -1.417154701  | 1.6047585591  | -2.4175008519 |
| H                                               | -2.3442204896 | 2.2766646045  | -1.6314794171 | C | -2.4965523432 | 2.4790115883  | 0.1532771953  |
| H                                               | -4.6149163397 | 0.19831974    | -1.8497155339 | C | -3.3207080588 | -0.1765679813 | -1.0593492154 |
| H                                               | -3.9171576119 | 1.0890605928  | -3.2154474036 | C | -0.9200290322 | 0.4574836522  | -3.3201923509 |
| H                                               | -4.6514485576 | 3.2589972653  | -2.2264881334 | C | -3.3405093859 | 3.4850705068  | -0.6547061143 |
| H                                               | -6.0323707305 | 2.1615543806  | -2.4344370828 | C | -3.2038549478 | 2.1140095764  | 1.4726098749  |
| H                                               | -5.9577289074 | 1.5479056587  | -0.0143586559 | C | -4.6293214767 | 0.4753172212  | -1.5365994092 |
| H                                               | -6.0834727033 | 3.3121076425  | -0.179028135  | C | -3.5810354516 | -1.1167997872 | 0.1358658177  |
| H                                               | -3.6266077414 | 3.5605685629  | 0.2046790868  | C | -3.6157513269 | 4.7453088742  | 0.1841396193  |
| H                                               | -4.3459952558 | 2.6461837427  | 1.5460842017  | C | -4.3131457227 | 4.3912474362  | 1.5064200348  |
| H                                               | -3.5711617192 | 0.4930816478  | 0.5558609479  | C | -3.4872093229 | 3.3728186772  | 2.307098795   |
| H                                               | -2.1869203108 | 1.5791823238  | 0.7491792001  | C | -4.6252543445 | -2.1836508028 | -0.2300742699 |
| H                                               | -0.585969635  | 1.8721855529  | -2.9813995121 | C | -5.929177058  | -1.5410992733 | -0.729009474  |
| H                                               | -2.3851692036 | 0.9443386423  | -4.4773421375 | C | -5.6627921591 | -0.5997860325 | -1.913872871  |
| H                                               | -1.3801236276 | -0.4781473094 | -4.814477744  | C | -0.4143189895 | 0.9764207212  | -4.675444688  |
| H                                               | -1.1695644194 | 1.1918703738  | -6.6508430047 | C | 0.6956974663  | 2.0193349277  | -4.4867213978 |
| H                                               | -0.6890775618 | 2.4509078869  | -5.4942747078 | C | 0.1999571487  | 3.178113047   | -3.6107072796 |
| H                                               | 1.3388236577  | 1.5400986078  | -6.6281825989 | C | -0.3076005271 | 2.6652072088  | -2.2545459773 |
| H                                               | 0.9013667778  | -0.112634301  | -6.1471805756 | H | 3.6083498967  | -0.9115811327 | 2.6490431898  |
| H                                               | 2.6384588918  | 0.7792637228  | -4.587472923  | H | 3.4103442251  | 0.9352442476  | 0.1177080596  |
| H                                               | 1.6319824262  | 2.1995198429  | -4.2354376359 | H | 1.2965381212  | -3.0915302077 | 1.1358195831  |
| H                                               | 1.4043773114  | 0.51941298    | -2.3860557207 | H | 4.3380307896  | -3.0974971413 | 0.831867161   |
| H                                               | 0.9487725031  | -0.7322659981 | -3.5545413442 | H | 3.4711543359  | -3.0974676886 | 2.3655602945  |
| H                                               | -2.9809104164 | -1.2008815607 | -2.9974731473 | H | 2.3827734347  | -5.2534662285 | 1.7854779869  |
| H                                               | -3.8182476913 | -2.8964063041 | -1.534113818  | H | 4.1423543657  | -5.4148912339 | 1.713315963   |
| H                                               | -3.7636830971 | -1.4163376366 | -0.5624627929 | H | 4.0827997026  | -5.1527968955 | -0.7641468977 |
| H                                               | -1.6371856493 | -2.1679101401 | 0.5207577142  | H | 3.0466343909  | -6.4981955615 | -0.2707420625 |
| H                                               | -2.9380079656 | -3.3741405951 | 0.7458209571  | H | 1.0351590359  | -5.0308484177 | -0.4432598766 |
| H                                               | -1.9897968511 | -4.7654162759 | -1.1180738164 | H | 1.9141667623  | -5.0361517077 | -1.9785124137 |
| H                                               | -0.7376717931 | -4.459880639  | 0.1064454053  | H | 1.2371114241  | -2.702649404  | -1.3202931601 |
| H                                               | 0.2027328886  | -2.5937265933 | -1.2631567244 | H | 2.9978060939  | -2.8778857956 | -1.3828028326 |
| H                                               | 0.1489378103  | -4.0887749678 | -2.2415865976 | H | 4.7844847099  | -1.6807268915 | -0.6421358877 |
| H                                               | -1.9713986732 | -3.340832001  | -3.3197171908 | H | 5.0829457677  | -0.797371947  | 0.8591013344  |
| H                                               | -0.6847010128 | -2.1541258868 | -3.5771230716 | H | 5.8288972233  | 1.1925026524  | -0.4654203465 |
|                                                 |               |               |               | H | 6.7987380138  | -0.2281452946 | -0.878220452  |
|                                                 |               |               |               | H | 5.4139146588  | -0.6117014189 | -2.9096130127 |
|                                                 |               |               |               | H | 6.090048403   | 1.0218138843  | -2.9405517344 |
|                                                 |               |               |               | H | 3.9303374955  | 1.9512440921  | -2.1124463023 |
|                                                 |               |               |               | H | 3.6583414311  | 1.0128757995  | -3.5849123533 |
|                                                 |               |               |               | H | 1.9369102627  | 0.4879829663  | -1.8129233592 |
|                                                 |               |               |               | H | 2.8943479454  | -0.9292842139 | -2.2362399556 |
| Pd(PCy <sub>3</sub> ) <sub>2</sub> B3LYP-D2/BS1 |               |               |               |   |               |               |               |
| Pd                                              | -0.0272797332 | -0.0488368735 | 0.1975777537  |   |               |               |               |
| P                                               | 2.0280112099  | -0.8718646289 | 0.7553134761  |   |               |               |               |
| P                                               | -1.8678733018 | 0.9491721868  | -0.7261861748 |   |               |               |               |
| C                                               | 2.5878762474  | -0.5280414927 | 2.5011679109  |   |               |               |               |
| C                                               | 3.3680569169  | -0.0864286848 | -0.2884059455 |   |               |               |               |

|   |               |               |               |
|---|---------------|---------------|---------------|
| H | 0.6125749766  | -0.9075005564 | 3.2726787216  |
| H | 1.6541638459  | -2.3320038798 | 3.3016023469  |
| H | 3.0008288892  | -1.3473193978 | 5.1568318342  |
| H | 1.2959370262  | -1.4674904009 | 5.6120519334  |
| H | 0.9629091536  | 0.9406777221  | 5.0619187752  |
| H | 2.2583238054  | 0.7664349233  | 6.2554215547  |
| H | 3.9669748578  | 0.9569862443  | 4.4523191225  |
| H | 2.9049288318  | 2.3705706256  | 4.4283685399  |
| H | 3.2933749315  | 1.5030676293  | 2.1271785585  |
| H | 1.5839804309  | 1.3795239101  | 2.5543155162  |
| H | -2.2944347603 | 2.0727745089  | -2.8880823165 |
| H | -1.5598786133 | 2.9876278071  | 0.4261206223  |
| H | -2.950379009  | -0.8132076676 | -1.8766274829 |
| H | -1.7181540211 | -0.2773140584 | -3.4820772329 |
| H | -0.1060022241 | -0.0610802103 | -2.7929975722 |
| H | -2.8271104565 | 3.7611882614  | -1.5822116236 |
| H | -4.2954921515 | 3.0306598334  | -0.9392694321 |
| H | -2.5902799853 | 1.4029725863  | 2.0403129918  |
| H | -4.1562003572 | 1.6154481078  | 1.2466683816  |
| H | -5.0420325265 | 1.086814797   | -0.7237518632 |
| H | -4.4417525194 | 1.1460513634  | -2.3847967719 |
| H | -3.9458087821 | -0.5316738898 | 0.9904704278  |
| H | -2.6343009986 | -1.5783481735 | 0.4439327515  |
| H | -2.6594963376 | 5.2435440089  | 0.4039929138  |
| H | -4.2245765899 | 5.4544782314  | -0.3920946785 |
| H | -5.2992728666 | 3.9557373264  | 1.2839195885  |
| H | -4.4872212506 | 5.2970078708  | 2.1017340268  |
| H | -4.0079313225 | 3.1018095078  | 3.2349208323  |
| H | -2.5294458893 | 3.8320383758  | 2.5939961645  |
| H | -4.8245068414 | -2.829792044  | 0.6348956479  |
| H | -4.2152059309 | -2.8245459538 | -1.02539629   |
| H | -6.6541242241 | -2.3152711127 | -1.0123067339 |
| H | -6.3791098311 | -0.9612442133 | 0.0911345887  |
| H | -5.2772591214 | -1.1862498569 | -2.7613371691 |
| H | -6.5968010746 | -0.127056816  | -2.245389367  |
| H | -0.0533489562 | 0.1361007778  | -5.283187939  |
| H | -1.250430082  | 1.436610494   | -5.2237790974 |
| H | 1.0416315642  | 2.393420639   | -5.459275223  |
| H | 1.5552117842  | 1.5423361868  | -3.9950416714 |
| H | 1.0018280362  | 3.911729798   | -3.4540633583 |
| H | -0.6177470332 | 3.6989164074  | -4.1321396333 |
| H | 0.52115745    | 2.2017992293  | -1.6994736519 |
| H | -0.6662566271 | 3.5046420776  | -1.6470491301 |

Pd(PCy<sub>3</sub>)<sub>2</sub> BP86/BS1

|    |               |               |               |
|----|---------------|---------------|---------------|
| Pd | 0.1565271273  | 0.088976029   | -0.1451328876 |
| P  | 2.1118783429  | -0.8187775831 | 0.6597805508  |
| P  | -1.7973400367 | 1.0095536362  | -0.9432487281 |
| C  | 2.3114486048  | -0.7074224699 | 2.5423102093  |
| C  | 3.6654527699  | 0.0570995946  | 0.0093725398  |
| C  | 2.2527145515  | -2.6938310393 | 0.3478303057  |
| C  | 3.3211661674  | -3.5018537683 | 1.120998084   |
| C  | 3.1517204347  | -5.0172642615 | 0.8727340861  |
| C  | 3.1916532144  | -5.3549407932 | -0.6288813915 |
| C  | 2.1439768363  | -4.5386026317 | -1.4098228623 |
| C  | 2.3073263304  | -3.0239739235 | -1.1625976131 |
| C  | 5.05069866    | -0.5287245574 | 0.3626259143  |

|   |               |               |               |
|---|---------------|---------------|---------------|
| C | 6.1823570803  | 0.4259150917  | -0.0797209601 |
| C | 6.0916873837  | 0.7498989185  | -1.5836613827 |
| C | 4.7021361817  | 1.303765606   | -1.9542018252 |
| C | 3.5730889534  | 0.352421512   | -1.5076765183 |
| C | 1.1463015705  | -1.4609877388 | 3.2300470471  |
| C | 1.222031044   | -1.37029612   | 4.7672418911  |
| C | 1.2706085046  | 0.093025255   | 5.2429136957  |
| C | 2.4301655351  | 0.8493360394  | 4.5694269203  |
| C | 2.3545899279  | 0.7606506296  | 3.0305078617  |
| C | -1.7441099025 | 1.5145816959  | -2.7719486704 |
| C | -2.2529658182 | 2.641166333   | -0.0787955428 |
| C | -3.2602799727 | -0.1984324832 | -0.8791088899 |
| C | -1.4528748129 | 0.2926915044  | -3.6766845645 |
| C | -3.3758701445 | 3.5231437027  | -0.6721142417 |
| C | -2.4610013765 | 2.4503978551  | 1.4426562208  |
| C | -4.6626457061 | 0.3041625494  | -1.2895159344 |
| C | -3.3258044614 | -0.9527262196 | 0.4712869831  |
| C | -3.444492076  | 4.8859789127  | 0.0531871768  |
| C | -3.6310426452 | 4.7123857337  | 1.57233884    |
| C | -2.5335833749 | 3.8100314163  | 2.1683210559  |
| C | -4.3337932079 | -2.1185053828 | 0.4066369425  |
| C | -5.7316512858 | -1.6374752455 | -0.0289975308 |
| C | -5.6675733826 | -0.8672047412 | -1.3616717688 |
| C | -1.3311302612 | 0.689772088   | -5.1624451086 |
| C | -0.2658447241 | 1.7808311566  | -5.3729131005 |
| C | -0.5516943645 | 3.00370343    | -4.4828670301 |
| C | -0.6719533081 | 2.6090256101  | -2.9963459459 |
| H | 3.2676704496  | -1.1955542592 | 2.8252449131  |
| H | 3.5797963977  | 1.0426747238  | 0.5164511371  |
| H | 1.2575333114  | -3.0366308599 | 0.7045148274  |
| H | 4.3342254345  | -3.1958415041 | 0.7981971902  |
| H | 3.2626160226  | -3.3020471645 | 2.2065162118  |
| H | 2.1798318741  | -5.3469286721 | 1.2947428773  |
| H | 3.9365652262  | -5.5776045171 | 1.416498152   |
| H | 4.2021179905  | -5.1254328648 | -1.0263515388 |
| H | 3.0318374657  | -6.4390506933 | -0.7845571603 |
| H | 1.1272093504  | -4.8488998057 | -1.0920700472 |
| H | 2.2149538782  | -4.7539225403 | -2.4932890917 |
| H | 1.5229344313  | -2.4523398983 | -1.6945423819 |
| H | 3.2823558203  | -2.6982861746 | -1.5778058987 |
| H | 5.1803608784  | -1.4980014784 | -0.1579690741 |
| H | 5.1313128667  | -0.7357986773 | 1.4465532433  |
| H | 6.1100251611  | 1.3676836195  | 0.502503374   |
| H | 7.1675083491  | -0.0180135122 | 0.1613167857  |
| H | 6.2796483545  | -0.1765098879 | -2.1650211669 |
| H | 6.8842648069  | 1.4671387412  | -1.8707768985 |
| H | 4.559214508   | 2.289582187   | -1.4649644554 |
| H | 4.6380580924  | 1.4819932811  | -3.044847248  |
| H | 2.577648117   | 0.7793837899  | -1.7371237089 |
| H | 3.650134464   | -0.5939184662 | -2.0787823375 |
| H | 0.1924188249  | -1.0202639767 | 2.8726654389  |
| H | 1.1334451879  | -2.5231604189 | 2.9218373785  |
| H | 2.130032224   | -1.9005830535 | 5.122676768   |
| H | 0.356689945   | -1.8952506768 | 5.2156010342  |
| H | 0.3131627378  | 0.5910220114  | 4.9862150456  |
| H | 1.3667537799  | 0.1401080839  | 6.3445776835  |
| H | 3.3936276215  | 0.4180285073  | 4.9124705306  |

|                                                 |               |               |               |   |               |               |               |
|-------------------------------------------------|---------------|---------------|---------------|---|---------------|---------------|---------------|
| H                                               | 2.4332595131  | 1.9113262968  | 4.88163275    | C | 1.1167288752  | 0.2173416287  | 5.2646582852  |
| H                                               | 3.2192589218  | 1.2925669499  | 2.5920477377  | C | 2.3445232323  | 0.8904106213  | 4.6335920951  |
| H                                               | 1.4457991133  | 1.2816420568  | 2.6653469487  | C | 2.3039276138  | 0.7678968215  | 3.1025730655  |
| H                                               | -2.7335729269 | 1.9303654347  | -3.0560686227 | C | -1.4321726928 | -1.3943444696 | -2.971373263  |
| H                                               | -1.2987091457 | 3.1994884424  | -0.1934159242 | C | -0.8092659187 | 3.3540959845  | -1.505259456  |
| H                                               | -2.9416521022 | -0.9504554141 | -1.633276129  | C | -3.1835025096 | -0.8492156248 | -0.6839008409 |
| H                                               | -2.2454266127 | -0.470780142  | -3.5677591364 | C | -1.232714184  | -3.1504902061 | -0.6762900303 |
| H                                               | -0.5103755756 | -0.181292685  | -3.3335895693 | C | 1.2978565674  | 3.3793338453  | 0.6293687897  |
| H                                               | -3.2221634018 | 3.6886084125  | -1.7545260823 | C | -1.5733627289 | 2.6945117919  | 1.2851733408  |
| H                                               | -4.3515869956 | 3.0122327743  | -0.5662671971 | C | -0.0653234608 | -1.9274931677 | -3.4476053063 |
| H                                               | -1.6418421291 | 1.8297634633  | 1.8537588544  | C | -4.3566100101 | -1.7306355865 | -1.1421893051 |
| H                                               | -3.4055182843 | 1.897633311   | 1.6218689094  | C | -3.3482412647 | -0.4987230546 | 0.8090855393  |
| H                                               | -5.0249207233 | 1.0349562863  | -0.5399420335 | C | -2.0049451245 | -4.1905000606 | -1.5106750839 |
| H                                               | -4.6303869903 | 0.8342003472  | -2.2602578503 | C | -1.464820305  | -3.3863677944 | 0.8273058629  |
| H                                               | -3.6321960089 | -0.2535954242 | 1.2745823798  | C | -5.6829565445 | -0.9739883218 | -0.9427169099 |
| H                                               | -2.3135278184 | -1.3154727167 | 0.7359058957  | C | -5.8604908511 | -0.534735697  | 0.5209739396  |
| H                                               | -2.5056658096 | 5.4458137015  | -0.1379380608 | C | -4.6549518354 | 0.279848023   | 1.021024586   |
| H                                               | -4.2655295496 | 5.4962450626  | -0.3700493888 | C | -1.0582463672 | -4.8109968998 | 1.2321523392  |
| H                                               | -4.6232367436 | 4.254560284   | 1.7661159986  | C | -1.8256195897 | -5.85254815   | 0.4037661031  |
| H                                               | -3.6366654828 | 5.6985473792  | 2.074810228   | C | -1.6153201881 | -5.6223225791 | -1.1004391276 |
| H                                               | -2.7087299607 | 3.6528700283  | 3.2499889654  | C | 0.0536035963  | -1.9217240245 | -4.978903254  |
| H                                               | -1.5521880689 | 4.3197380676  | 2.077824201   | C | -0.1932405926 | -0.5151054549 | -5.5425525437 |
| H                                               | -4.3897586536 | -2.6253056388 | 1.3891457223  | C | -1.5658445983 | 0.0074815957  | -5.0980102985 |
| H                                               | -3.966143989  | -2.8747940217 | -0.3175932333 | C | -1.692446384  | 0.0006883481  | -3.5675101705 |
| H                                               | -6.4277901223 | -2.4938613845 | -0.1131897872 | C | -2.2473609408 | 2.9011750814  | -1.8288631394 |
| H                                               | -6.1465694095 | -0.9700640447 | 0.7545417223  | C | -0.7205868872 | 4.8918228314  | -1.5862722982 |
| H                                               | -5.3591033764 | -1.5607138523 | -2.1710787919 | C | 1.1313792419  | 4.7194689472  | 1.369121157   |
| H                                               | -6.6704575694 | -0.4880384044 | -1.6376779469 | C | 2.3432773582  | 3.4767038393  | -0.5015353411 |
| H                                               | -1.0945423292 | -0.2052738867 | -5.7692755161 | C | -2.2097783103 | 4.0794233778  | 1.5251243754  |
| H                                               | -2.3119735296 | 1.0637577879  | -5.5230546926 | C | -1.1361496718 | 2.0474773285  | 2.615251114   |
| H                                               | -0.2220891966 | 2.0791583671  | -6.4378999697 | C | -2.6628883818 | 3.3586329653  | -3.2324462798 |
| H                                               | 0.7320474716  | 1.3694859316  | -5.1172114416 | C | -2.5528644783 | 4.8864476338  | -3.3566210048 |
| H                                               | 0.2429457093  | 3.764952023   | -4.6032547326 | C | -1.1423539058 | 5.3723752813  | -2.9881625836 |
| H                                               | -1.4972873856 | 3.4820509593  | -4.8128776766 | C | 3.6863815744  | 4.0012819919  | 0.0284299361  |
| H                                               | 0.301850273   | 2.2237110511  | -2.6293007706 | C | 3.5120769892  | 5.3530566683  | 0.7352458125  |
| H                                               | -0.8998607398 | 3.5076990083  | -2.3933244176 | C | 2.490219623   | 5.2371271973  | 1.8734854806  |
| Pd(PCy <sub>3</sub> ) <sub>3</sub> B3LYP-D2/BS1 |               |               |               | C | -2.2903044474 | 1.9685340453  | 3.6230317669  |
| Pd                                              | 0.1387162373  | 0.1159623866  | -0.1625075922 | C | -2.9249092552 | 3.3478449616  | 3.8496071517  |
| P                                               | 2.0307412465  | -0.8501264211 | 0.7900786812  | C | -3.381736394  | 3.9585082893  | 2.5166606314  |
| P                                               | -1.4217420609 | -1.3273394595 | -1.1002102754 | H | 3.1322775598  | -1.208308794  | 2.9754683142  |
| P                                               | -0.2081936125 | 2.4309572549  | 0.0189553664  | H | 3.5442475154  | 0.9497666034  | 0.5559671127  |
| C                                               | 2.2155453047  | -0.6976873759 | 2.6489075842  | H | 1.2180791563  | -3.0763695042 | 0.8228453634  |
| C                                               | 3.5998354072  | -0.0667814679 | 0.1372076723  | H | 4.2262277604  | -3.1569052095 | 1.351732072   |
| C                                               | 2.2311571222  | -2.7193242184 | 0.596362124   | H | 2.970024279   | -3.2492437537 | 2.5842287818  |
| C                                               | 3.1936897267  | -3.4752005729 | 1.5364074328  | H | 2.0796455408  | -5.3256132864 | 1.6104575818  |
| C                                               | 3.0879670336  | -4.9960759153 | 1.3205072529  | H | 3.7963995266  | -5.5171014843 | 1.9783543631  |
| C                                               | 3.3380949533  | -5.3810189169 | -0.1447681279 | H | 4.3760511193  | -5.1290041794 | -0.4101966657 |
| C                                               | 2.3870515037  | -4.6191605716 | -1.0794360736 | H | 3.2243904115  | -6.4647350495 | -0.2795898982 |
| C                                               | 2.5160566051  | -3.1033996732 | -0.8675623296 | H | 1.3535422606  | -4.9243742874 | -0.8666747227 |
| C                                               | 4.9496083151  | -0.6704598224 | 0.5583534056  | H | 2.5914209929  | -4.87468485   | -2.1279543356 |
| C                                               | 6.1100461713  | 0.2116388247  | 0.0669350634  | H | 1.8411256028  | -2.5569631232 | -1.5365267584 |
| C                                               | 6.0546977061  | 0.3853912266  | -1.4592914335 | H | 3.5417512856  | -2.8074473204 | -1.1228173297 |
| C                                               | 4.7012869687  | 0.965415118   | -1.9012271573 | H | 5.0526104735  | -1.669178537  | 0.1113121986  |
| C                                               | 3.5375345463  | 0.0985074758  | -1.3967010242 | H | 4.9941221225  | -0.7974073783 | 1.6476499192  |
| C                                               | 1.0023037818  | -1.3867545532 | 3.3103751718  | H | 6.03 4635857  | 1.2000598049  | 0.5449548411  |
| C                                               | 1.0328611938  | -1.2561062351 | 4.8405862225  | H | 7.0732026965  | -0.2217590843 | 0.3679415859  |
|                                                 |               |               |               | H | 6.1957057124  | -0.5979219206 | -1.9334592168 |

|   |               |               |               |               |
|---|---------------|---------------|---------------|---------------|
| H | 6.8763531104  | 1.0287        | 929705        | -1.8003864667 |
| H | 4.5985110724  | 1.9790616569  | -1.4927415622 |               |
| H | 4.6622816715  | 1.0506614546  | -2.9956386338 |               |
| H | 2.5653879825  | 0.5270926777  | -1.6736111132 |               |
| H | 3.5952122704  | -0.8842072541 | -1.8775955147 |               |
| H | 0.0863619487  | -0.9189269797 | 2.9217854398  |               |
| H | 0.9611938257  | -2.4447118066 | 3.02327799    |               |
| H | 1.9103 802284 | -1.7927316789 | 5.2320861158  |               |
| H | 0.1431389105  | -1.7310206597 | 5.2751640821  |               |
| H | 0.2097708033  | 0.7396454672  | 4.9253898472  |               |
| H | 1.1516522309  | 0.300981 7927 | 6.3587429109  |               |
| H | 3.2568565666  | 0.408856605   | 5.0166015576  |               |
| H | 2.392022403   | 1.9493696305  | 4.9214678794  |               |
| H | 3.1832636042  | 1.2535894021  | 2.6611842273  |               |
| H | 1.4203362091  | 1.2945247627  | 2.7325959237  |               |
| H | -2.2202634088 | -2.0767691451 | -3.3213006526 |               |
| H | -0.1653073176 | 2.953889733   | -2.3044175098 |               |
| H | -3.2737270151 | 0.1032642445  | -1.2254099142 |               |
| H | -0.1637649067 | -3.3185824031 | -0.8613098089 |               |
| H | 1.7197356283  | 2.6771488405  | 1.3554465736  |               |
| H | -2.3743838021 | 2.0674890443  | 0.8742908057  |               |
| H | 0.1047120301  | -2.9401503111 | -3.0620303375 |               |
| H | 0.7173038874  | -1.286102714  | -3.0164230688 |               |
| H | -4.2388273986 | -2.0275952173 | -2.1920531715 |               |
| H | -4.3769372783 | -2.6502988625 | -0.5422635285 |               |
| H | -2.4765097039 | 0.0660824918  | 1.1557470267  |               |
| H | -3.3865243619 | -1.4197425068 | 1.4043825424  |               |
| H | -3.0830818656 | -4.0600251761 | -1.3660548398 |               |
| H | -1.8037988579 | -4.0487938818 | -2.5785826343 |               |
| H | -2.5313649492 | -3.2541206038 | 1.0515878154  |               |
| H | -0.9120212994 | -2.6383596399 | 1.4102454628  |               |
| H | -5.6806442998 | -0.0827315759 | -1.588438666  |               |
| H | -6.5311129638 | -1.5973902549 | -1.2556854014 |               |
| H | -5.9608896516 | -1.432797662  | 1.149180861   |               |
| H | -6.7876521263 | 0.0421568003  | 0.6344469879  |               |
| H | -4.7847465963 | 0.5353619539  | 2.0809632223  |               |
| H | -4.5970498019 | 1.2298305643  | 0.4673378998  |               |
| H | -1.2365150096 | -4.9668143324 | 2.3046992546  |               |
| H | 0.0195838861  | -4.9383228738 | 1.0609678518  |               |
| H | -1.516323993  | -6.8687003111 | 0.6815898447  |               |
| H | -2.8990291839 | -5.7670931319 | 0.6316456517  |               |
| H | -0.5562845407 | -5.7888017467 | -1.3444290035 |               |
| H | -2.1963319914 | -6.3502288237 | -1.6824254615 |               |
| H | 1.0447663923  | -2.2878273304 | -5.2782751294 |               |
| H | -0.6891486696 | -2.6142873458 | -5.4031352048 |               |
| H | -0.1187156457 | -0.5200057789 | -6.6378509014 |               |
| H | 0.5876313608  | 0.1625733863  | -5.1649810547 |               |
| H | -1.7337561243 | 1.0243099839  | -5.4778063082 |               |
| H | -2.3503753184 | -0.6322222825 | -5.5297871131 |               |
| H | -0.9673378313 | 0.7015710637  | -3.1309582178 |               |
| H | -2.6892120654 | 0.356303575   | -3.2831799799 |               |
| H | -2.3178232474 | 1.8160521566  | -1.7361386035 |               |
| H | -2.939597478  | 3.3340929283  | -1.0948455766 |               |
| H | 0.2936434156  | 5.2402973051  | -1.3745987917 |               |
| H | -1.3746935385 | 5.3486609773  | -0.8341443276 |               |
| H | 0.6675773313  | 5.4692829948  | 0.717025015   |               |

|   |               |              |               |
|---|---------------|--------------|---------------|
| H | 0.4703141292  | 4.5823780288 | 2.2299957438  |
| H | 1.9895723496  | 4.1488963929 | -1.2932939523 |
| H | 2.4776681212  | 2.4901560007 | -0.9545940674 |
| H | -1.478047085  | 4.7881181456 | 1.9238901391  |
| H | -2.5760871016 | 4.4971087822 | 0.5834938468  |
| H | -0.3150163892 | 2.6357683863 | 3.0503820309  |
| H | -0.7390182083 | 1.0456449975 | 2.412695364   |
| H | -2.0044885951 | 2.8793573029 | -3.9717094893 |
| H | -3.6875788421 | 3.0296776926 | -3.4528134845 |
| H | -3.2797322795 | 5.3504506819 | -2.6727571261 |
| H | -2.8138264706 | 5.2108936365 | -4.3724923222 |
| H | -1.0911228688 | 6.4680125412 | -3.0416955772 |
| H | -0.4251192147 | 4.9795277088 | -3.7247809426 |
| H | 4.4087633808  | 4.0871214497 | -0.7939603468 |
| H | 4.0970398441  | 3.2696047266 | 0.7413274837  |
| H | 4.4753270135  | 5.7129228346 | 1.1198098409  |
| H | 3.1567459742  | 6.0957770252 | 0.0047519796  |
| H | 2.877132041   | 4.5328166733 | 2.6258798975  |
| H | 2.3602879822  | 6.2052767543 | 2.3750885438  |
| H | -3.0531913161 | 1.2809527711 | 3.2316629989  |
| H | -1.930072756  | 1.5482592072 | 4.5720546402  |
| H | -2.1811987888 | 4.0142070105 | 4.31272356    |
| H | -3.7699862108 | 3.2723212076 | 4.5463728751  |
| H | -3.8353896169 | 4.9448019692 | 2.6816972527  |
| H | -4.1568060635 | 3.3135212968 | 2.0755901864  |

Pd(PCy<sub>3</sub>)<sub>3</sub> BP86/BS1

|    |               |               |               |
|----|---------------|---------------|---------------|
| Pd | 0.1419629882  | 0.111485324   | -0.0844069225 |
| P  | 2.1711126408  | -0.8996282163 | 0.6882834182  |
| P  | -1.5453443365 | -1.2805116779 | -1.0487810864 |
| P  | -0.2527106105 | 2.4801934189  | 0.1967103981  |
| C  | 2.5065357909  | -0.7776386976 | 2.5644135327  |
| C  | 3.730531016   | -0.0650731435 | -0.0356051867 |
| C  | 2.4454338907  | -2.8018606092 | 0.4595127061  |
| C  | 3.4534115559  | -3.5502257153 | 1.3698845504  |
| C  | 3.3916575722  | -5.0781293991 | 1.1391052115  |
| C  | 3.6261880649  | -5.4507414687 | -0.335532111  |
| C  | 2.6449205736  | -4.6979324658 | -1.251419042  |
| C  | 2.7177585466  | -3.1747912134 | -1.0164426368 |
| C  | 5.1254072672  | -0.6361716906 | 0.3084449713  |
| C  | 6.2507198765  | 0.2762477449  | -0.2287134765 |
| C  | 6.1185977945  | 0.4965463889  | -1.747218284  |
| C  | 4.7289781371  | 1.0573299916  | -2.1064861308 |
| C  | 3.5944395247  | 0.1650815646  | -1.5618662386 |
| C  | 1.382467397   | -1.4860174594 | 3.3591800377  |
| C  | 1.6412863508  | -1.4480978597 | 4.8800082474  |
| C  | 1.8246377162  | -0.0061152604 | 5.3868543913  |
| C  | 2.9232374396  | 0.7217807597  | 4.5908478546  |
| C  | 2.6504766466  | 0.6712956539  | 3.0721363488  |
| C  | -1.4331825854 | -1.5433483375 | -2.9395569937 |
| C  | -0.748770923  | 3.429622682   | -1.3954038062 |
| C  | -3.3753927768 | -0.705347487  | -0.8926536371 |
| C  | -1.5081535878 | -3.096517382  | -0.4363841686 |
| C  | 1.1973117426  | 3.5041210261  | 0.9248411454  |
| C  | -1.7155001914 | 2.7087622563  | 1.4074267565  |
| C  | -0.0939314529 | -2.1875590149 | -3.3612007566 |
| C  | -4.4640703048 | -1.3132970021 | -1.811132254  |

|   |               |               |               |   |               |               |               |
|---|---------------|---------------|---------------|---|---------------|---------------|---------------|
| C | -3.868046713  | -0.7075774365 | 0.5730656578  | H | 3.9034005082  | 0.2462602918  | 4.8018783341  |
| C | -2.5483308038 | -4.1005996992 | -0.9833758987 | H | 3.007441477   | 1.7747348968  | 4.9226633436  |
| C | -1.4445667563 | -3.1928909159 | 1.1064145239  | H | 3.4598906106  | 1.200799186   | 2.5354936985  |
| C | -5.798883162  | -0.5472290452 | -1.6692333082 | H | 1.7109819199  | 1.2127470423  | 2.8467847406  |
| C | -6.2858925324 | -0.5162061235 | -0.2095251061 | H | -2.2498717622 | -2.2327150867 | -3.2390512022 |
| C | -5.2012039901 | 0.0555742795  | 0.722955416   | H | 0.0068776464  | 3.0508193618  | -2.1176333352 |
| C | -1.1365881427 | -4.6312388335 | 1.5731569546  | H | -3.2782234645 | 0.3623716859  | -1.1799388183 |
| C | -2.1474133242 | -5.6444674234 | 1.0031290994  | H | -0.5102000732 | -3.4189904755 | -0.8053243825 |
| C | -2.2268867271 | -5.542369644  | -0.5309497437 | H | 1.5652005898  | 2.8169360304  | 1.712628609   |
| C | 0.0009602392  | -2.3837578424 | -4.8893794965 | H | -2.4594986253 | 2.0124953142  | 0.9658172482  |
| C | -0.2073981435 | -1.0593462023 | -5.644814058  | H | 0.0460283235  | -3.1629385307 | -2.8599510002 |
| C | -1.5363828022 | -0.4024606353 | -5.2333120141 | H | 0.7315194497  | -1.531500744  | -3.0186525624 |
| C | -1.6261330965 | -0.2130689613 | -3.7041827485 | H | -4.1500305061 | -1.2951493955 | -2.8700402513 |
| C | -2.126517147  | 2.935472534   | -1.8923548252 | H | -4.6332865677 | -2.3750492017 | -1.5518706435 |
| C | -0.6980127569 | 4.9782940484  | -1.4508859316 | H | -3.0951011554 | -0.2688706514 | 1.2333903057  |
| C | 0.9651194377  | 4.8702589191  | 1.6154394715  | H | -4.0218844162 | -1.7517909839 | 0.9105901012  |
| C | 2.3306149213  | 3.5979821961  | -0.1270021461 | H | -3.5535890034 | -3.8309771905 | -0.604192924  |
| C | -2.4253302453 | 4.0748358533  | 1.575862014   | H | -2.6035466225 | -4.0606948887 | -2.0868239594 |
| C | -1.3281982346 | 2.1173577255  | 2.786432366   | H | -2.4126897674 | -2.8810533945 | 1.5430928963  |
| C | -2.4590376342 | 3.4561807847  | -3.3038159659 | H | -0.686552585  | -2.4832995181 | 1.4869872749  |
| C | -2.3962476805 | 4.9931878291  | -3.3640768379 | H | -5.6602215076 | 0.4931289298  | -2.0301143887 |
| C | -1.0313650349 | 5.5010505349  | -2.8673022347 | H | -6.5664352479 | -1.0054572767 | -2.3227354411 |
| C | 3.6317494062  | 4.1680436173  | 0.4728885098  | H | -6.5334177452 | -1.5489249412 | 0.1126560992  |
| C | 3.3899185706  | 5.5361749243  | 1.1347717144  | H | -7.2198306355 | 0.0718202855  | -0.1248031601 |
| C | 2.2810537387  | 5.4373876513  | 2.1977869325  | H | -5.5408635787 | 0.0222937953  | 1.77635197    |
| C | -2.5405326091 | 2.0197059927  | 3.734368827   | H | -5.0360894906 | 1.125470793   | 0.4778907558  |
| C | -3.2433685623 | 3.3801556724  | 3.8954213846  | H | -1.1269531297 | -4.6763539134 | 2.6794216464  |
| C | -3.640449043  | 3.9571752353  | 2.5245341881  | H | -0.116753446  | -4.9134144236 | 1.2377414394  |
| H | 3.4620070127  | -1.3014046096 | 2.7714132453  | H | -1.8793364539 | -6.6737767926 | 1.3094614658  |
| H | 3.6678242595  | 0.9400168934  | 0.4326177826  | H | -3.1499958691 | -5.4386855441 | 1.4319691291  |
| H | 1.4370396543  | -3.1939238609 | 0.7092778712  | H | -1.2563882431 | -5.8536962453 | -0.9700488168 |
| H | 4.4825441438  | -3.1967458711 | 1.1684924801  | H | -2.9889972301 | -6.2416803369 | -0.9262078365 |
| H | 3.2554117377  | -3.3485015249 | 2.4372677992  | H | 0.9812271615  | -2.8279621146 | -5.149080437  |
| H | 2.3939049364  | -5.4492981251 | 1.4529428451  | H | -0.7703400992 | -3.1133790221 | -5.2127743127 |
| H | 4.1317092395  | -5.5841866578 | 1.7890996859  | H | -0.1787422796 | -1.2272457365 | -6.7384943256 |
| H | 4.6651352005  | -5.1821760205 | -0.61831442   | H | 0.6286744332  | -0.3695061987 | -5.4076461294 |
| H | 3.5336784034  | -6.5444901168 | -0.4784036901 | H | -1.6595367486 | 0.5748908433  | -5.7385192767 |
| H | 1.6118259914  | -5.0505799466 | -1.0505382765 | H | -2.3792508254 | -1.0399530789 | -5.5725255383 |
| H | 2.8541481147  | -4.9263023293 | -2.3145857747 | H | -0.8438434957 | 0.4985937698  | -3.3711050934 |
| H | 2.0084407341  | -2.6527779268 | -1.681572268  | H | -2.5982106912 | 0.2485575591  | -3.4511821671 |
| H | 3.7325694902  | -2.8308174098 | -1.3001559596 | H | -2.1395242296 | 1.832795893   | -1.8767174874 |
| H | 5.240829084   | -1.6398807049 | -0.145043953  | H | -2.9167290466 | 3.2753284753  | -1.1930068706 |
| H | 5.2394658416  | -0.766846756  | 1.4013018121  | H | 0.2978041268  | 5.3539929037  | -1.1610027846 |
| H | 6.2024377853  | 1.2565757624  | 0.2887556933  | H | -1.417689924  | 5.4076016846  | -0.7279519567 |
| H | 7.2389443607  | -0.1598106452 | 0.0147282295  | H | 0.5353507948  | 5.6023535158  | 0.9077878138  |
| H | 6.2667441374  | -0.4723172464 | -2.2677844142 | H | 0.2347543275  | 4.7611185331  | 2.436035501   |
| H | 6.9150938692  | 1.1740406666  | -2.1103186573 | H | 2.018720984   | 4.2507579106  | -0.9661328503 |
| H | 4.6299512599  | 2.0760272079  | -1.6786631428 | H | 2.5102684265  | 2.5968611372  | -0.5606425724 |
| H | 4.6292322592  | 1.1669610218  | -3.2038549045 | H | -1.7263282066 | 4.8286392649  | 1.9812724943  |
| H | 2.6043869243  | 0.6141534048  | -1.7763697492 | H | -2.7678885973 | 4.459579646   | 0.5987720027  |
| H | 3.6181967448  | -0.8057267827 | -2.0926577975 | H | -0.5544865418 | 2.7559541219  | 3.2608235125  |
| H | 0.422705672   | -0.9791714606 | 3.1308346742  | H | -0.8702989109 | 1.1199952155  | 2.637938448   |
| H | 1.2642050661  | -2.5352721001 | 3.0307361115  | H | -1.7334227998 | 3.0319761205  | -4.0280534597 |
| H | 2.5556684149  | -2.034382072  | 5.1083145484  | H | -3.4598457988 | 3.0970458932  | -3.613019858  |
| H | 0.8091947772  | -1.9435305807 | 5.4165347628  | H | -3.198177897  | 5.416229564   | -2.7241533417 |
| H | 0.8679579278  | 0.5435699799  | 5.270987844   | H | -2.5919633223 | 5.3517861867  | -4.392803088  |
| H | 2.0621385644  | -0.002355084  | 6.4679771842  | H | -1.0048382955 | 6.6079795465  | -2.8710164043 |



|   |               |              |               |
|---|---------------|--------------|---------------|
| H | -0.2411336162 | 5.1662251261 | -3.570986901  |
| H | 4.4071484715  | 4.2493173947 | -0.3135178718 |
| H | 4.0259258762  | 3.4614461814 | 1.2327617334  |
| H | 4.3244349095  | 5.9208159279 | 1.5862599043  |
| H | 3.0891541062  | 6.2694285595 | 0.3578655544  |
| H | 2.6272976573  | 4.7757051423 | 3.0187954186  |
| H | 2.0903100666  | 6.4282217829 | 2.6537309038  |
| H | -3.2626040703 | 1.2843919685 | 3.3235215872  |
| H | -2.2196153025 | 1.6294081423 | 4.7196245651  |
| H | -2.557396318  | 4.0881480652 | 4.4052826002  |
| H | -4.1338405036 | 3.2817853009 | 4.5455313668  |
| H | -4.1183674431 | 4.948654326  | 2.6448741322  |
| H | -4.4008398917 | 3.2956273377 | 2.0597853797  |

Table SI4c

Pd(PPh<sub>3</sub>) B3LYP-D2/BS1

|    |              |               |               |
|----|--------------|---------------|---------------|
| Pd | 0.097875079  | 0.0073369964  | 0.07546926    |
| P  | 2.2906810077 | -0.0066628143 | 0.0037922146  |
| C  | 4.2395847065 | 4.2100252446  | -0.0397254036 |
| C  | 4.9139309675 | 3.1575455181  | 0.5848359546  |
| C  | 4.3432205556 | 1.8824687013  | 0.6236110403  |
| C  | 3.0892873251 | 1.6518438076  | 0.03816801    |
| C  | 2.412588941  | 2.7166164129  | -0.5763456788 |
| C  | 2.9874125223 | 3.9875027476  | -0.62121633   |
| H  | 4.6839711591 | 5.2016443513  | -0.0659502056 |
| H  | 5.8837180357 | 3.3283305065  | 1.0453884672  |
| H  | 4.8681440693 | 1.067905563   | 1.1139900069  |
| H  | 1.4287129467 | 2.5363973589  | -1.0043274456 |
| H  | 2.4547963757 | 4.8055260275  | -1.0993770377 |
| C  | 4.3190218437 | -2.1518538375 | 3.5907586862  |
| C  | 4.9406622098 | -2.1866255228 | 2.3397391374  |
| C  | 4.3445199152 | -1.5602797451 | 1.2418982503  |
| C  | 3.1176410269 | -0.8956092144 | 1.3881107194  |
| C  | 2.4932438381 | -0.8759897681 | 2.6446852952  |
| C  | 3.0939875358 | -1.4947013441 | 3.7419509583  |
| H  | 4.783002164  | -2.6420330651 | 4.4427756186  |
| H  | 5.8890078457 | -2.7034811038 | 2.2162132504  |
| H  | 4.828306495  | -1.5925609689 | 0.2700799151  |
| H  | 1.5288898172 | -0.3823086835 | 2.7442477027  |
| H  | 2.6020582746 | -1.4739902852 | 4.7110009726  |
| C  | 4.0861594557 | -2.1130872297 | -3.7275846978 |
| C  | 4.7719804706 | -1.0353940804 | -3.1611842475 |
| C  | 4.2463588117 | -0.3762224104 | -2.0466465319 |
| C  | 3.0261850412 | -0.7901569826 | -1.4913711973 |
| C  | 2.3369204557 | -1.864923678  | -2.0737052164 |
| C  | 2.8673642487 | -2.5275796474 | -3.1814969055 |
| H  | 4.495350699  | -2.6226472662 | -4.5961351256 |
| H  | 5.7156637105 | -0.7046840331 | -3.5876302327 |
| H  | 4.780343617  | 0.4635195123  | -1.6115894293 |
| H  | 1.3781526155 | -2.1629609258 | -1.6546597482 |
| H  | 2.3255102073 | -3.3589175218 | -3.6250702665 |

Pd(PPh<sub>3</sub>) BP86/BS1

|    |              |               |               |
|----|--------------|---------------|---------------|
| Pd | 0.1219223171 | -0.0217291661 | 0.0722382561  |
| P  | 2.2985135591 | -0.0180550981 | 0.0023293233  |
| C  | 4.2006200672 | 4.2585350732  | -0.0183781128 |
| C  | 4.8503112479 | 3.2251959001  | 0.6750673905  |

|   |              |               |               |
|---|--------------|---------------|---------------|
| C | 4.2989919424 | 1.9327533531  | 0.6991564994  |
| C | 3.0850840737 | 1.6645965741  | 0.0315015673  |
| C | 2.4326014704 | 2.7127602379  | -0.6542119516 |
| C | 2.9908941175 | 3.998839156   | -0.6855938754 |
| H | 4.6309028182 | 5.2663611324  | -0.0321968486 |
| H | 5.7900842019 | 3.4232653807  | 1.2033881924  |
| H | 4.8112343155 | 1.132433592   | 1.2441191963  |
| H | 1.4751867194 | 2.5081565629  | -1.14989478   |
| H | 2.4740540664 | 4.8032750686  | -1.2212736965 |
| C | 4.3284335964 | -2.1801704287 | 3.6230102064  |
| C | 4.8995355268 | -2.3043310988 | 2.3466446088  |
| C | 4.3095878216 | -1.6674836906 | 1.2413567343  |
| C | 3.1347577019 | -0.9030225616 | 1.4047593871  |
| C | 2.5607179904 | -0.792892861  | 2.6906361846  |
| C | 3.1581489937 | -1.4201838343 | 3.7932128225  |
| H | 4.7888411534 | -2.680921145  | 4.4822526263  |
| H | 5.8082387194 | -2.9010254593 | 2.2061464668  |
| H | 4.7618199081 | -1.7704951197 | 0.2489411502  |
| H | 1.6322336242 | -0.2206667341 | 2.8113451652  |
| H | 2.7020633549 | -1.326360381  | 4.7853703562  |
| C | 4.0897027938 | -2.1162595664 | -3.7784025886 |
| C | 4.725697143  | -0.975009986  | -3.2647590298 |
| C | 4.2072689584 | -0.3247585382 | -2.1319056291 |
| C | 3.0396414966 | -0.8097623262 | -1.505557319  |
| C | 2.4001163801 | -1.9521611865 | -2.0355135293 |
| C | 2.9263999493 | -2.6055601377 | -3.1592162954 |
| H | 4.4943650838 | -2.6192832415 | -4.6639942763 |
| H | 5.6293242842 | -0.5847632012 | -3.747140093  |
| H | 4.7091231396 | 0.5655911353  | -1.7379943096 |
| H | 1.4776089776 | -2.3118098932 | -1.5624621921 |
| H | 2.4202264764 | -3.491064891  | -3.5602818467 |

Pd(PPh<sub>3</sub>)<sub>2</sub> B3LYP-D2/BS1

|    |               |               |               |
|----|---------------|---------------|---------------|
| Pd | 0.0004457527  | 0.0128791055  | -0.0049884475 |
| P  | -2.2795352712 | 0.0168817647  | -0.0059445678 |
| C  | -4.154819965  | 3.7177098109  | 2.0784242284  |
| C  | -4.8572720947 | 3.1019508867  | 1.0387033108  |
| C  | -4.313778327  | 1.9925580043  | 0.385635774   |
| C  | -3.060916268  | 1.4909988914  | 0.7684433358  |
| C  | -2.3542780834 | 2.1239591615  | 1.803390363   |
| C  | -2.9020971078 | 3.2275431495  | 2.45977315    |
| H  | -4.5782572354 | 4.58217 23427 | 2.5835033158  |
| H  | -5.8270324107 | 3.4869255878  | 0.7332968694  |
| H  | -4.8558672725 | 1.521905758   | -0.4297708241 |
| H  | -1.3686658763 | 1.7493431008  | 2.0727459206  |
| H  | -2.3471342725 | 3.7117087913  | 3.2593013376  |
| C  | -4.1590556342 | -0.0327596719 | -4.2512534856 |
| C  | -4.8578418146 | -0.6286747055 | -3.197696732  |
| C  | -4.3125475192 | -0.6381904305 | -1.9110842055 |
| C  | -3.0619974225 | -0.0511116475 | -1.6690229924 |
| C  | -2.3586987056 | 0.5319152845  | -2.7351741907 |
| C  | -2.9081454562 | 0.5472456392  | -4.0183874876 |
| H  | -4.5835290748 | -0.0287440493 | -5.2519972823 |
| H  | -5.8259635225 | -1.0895893312 | -3.3772267908 |
| H  | -4.8520738456 | -1.1109586488 | -1.0953771452 |
| H  | -1.3744252385 | 0.95647857    | -2.546672396  |

|   |               |               |               |
|---|---------------|---------------|---------------|
| H | -2.3558770731 | 1.0005249423  | -4.837645659  |
| C | -4.1447083878 | -3.6337930392 | 2.1747700251  |
| C | -4.8517584917 | -2.4282969296 | 2.1523749274  |
| C | -4.3115110159 | -1.3102053134 | 1.511625555   |
| C | -3.0575430978 | -1.3899487371 | 0.8880647046  |
| C | -2.3465544721 | -2.5998138955 | 0.9273309478  |
| C | -2.8908821661 | -3.7180352182 | 1.5616039509  |
| H | -4.5651878227 | -4.5017362653 | 2.676321459   |
| H | -5.8223293374 | -2.3565209494 | 2.6369134959  |
| H | -4.8575806454 | -0.3709359687 | 1.5053606156  |
| H | -1.360809729  | -2.6450166616 | 0.4683489122  |
| H | -2.3324017864 | -4.650287386  | 1.5872864366  |
| P | 2.2797863776  | -0.0028506968 | 0.0001038645  |
| C | 4.1479848269  | 0.2987996299  | 4.2397985272  |
| C | 4.8559197848  | 0.8182702446  | 3.1523470154  |
| C | 4.3142790114  | 0.7504842051  | 1.8660508315  |
| C | 3.0579952098  | 0.1622552604  | 1.6583217688  |
| C | 2.3458608231  | -0.3440008534 | 2.757291807   |
| C | 2.8918371563  | -0.2823425341 | 4.0407070298  |
| H | 4.5697725362  | 0.3549866359  | 5.2401060855  |
| H | 5.8283840766  | 1.2796656997  | 3.3051955174  |
| H | 4.8609663792  | 1.1641976016  | 1.0232932971  |
| H | 1.3581354437  | -0.7704492243 | 2.5924627063  |
| H | 2.3331040755  | -0.676727537  | 4.8856672235  |
| C | 4.1849368811  | 3.4948679238  | -2.3866563576 |
| C | 2.9347170369  | 3.6297976867  | -1.7750755452 |
| C | 2.3781176287  | 2.555785979   | -1.0782607786 |
| C | 3.0735784282  | 1.3406926519  | -0.9737142611 |
| C | 4.3239296684  | 1.2096881404  | -1.5956056062 |
| C | 4.8762083328  | 2.2832378023  | -2.2993834879 |
| H | 4.6148303625  | 4.3279235792  | -2.9370192524 |
| H | 2.3886187725  | 4.5666780179  | -1.8506839311 |
| H | 1.3944994361  | 2.6395461566  | -0.6200726849 |
| H | 4.8574844979  | 0.2650331748  | -1.5382115711 |
| H | 5.843830486   | 2.171724803   | -2.7822943527 |
| C | 4.1274615688  | -3.8400486238 | -1.8489487944 |
| C | 4.829306928   | -3.1723681033 | -0.8414234493 |
| C | 4.2939113614  | -2.0204371576 | -0.2589899525 |
| C | 3.0494389465  | -1.5287153046 | -0.6797293817 |
| C | 2.3430866461  | -2.2132207607 | -1.6814955146 |
| C | 2.8831501986  | -3.3590155939 | -2.2681330514 |
| H | 4.5446152039  | -4.7370956609 | -2.2994714084 |
| H | 5.7924125075  | -3.5492622537 | -0.5062969401 |
| H | 4.8362554709  | -1.508102395  | 0.530844138   |
| H | 1.364201513   | -1.8434693446 | -1.980478612  |
| H | 2.3287624236  | -3.8823219014 | -3.0430283081 |

Pd(PPh<sub>3</sub>)<sub>2</sub> BP86/BS1

|    |              |               |               |
|----|--------------|---------------|---------------|
| Pd | 0.0000106298 | -0.0020613707 | 0.0017496209  |
| P  | 2.2842244068 | -0.0081439972 | -0.0056160341 |
| C  | 4.1664458811 | 3.283433341   | -2.747603615  |
| C  | 4.8346039124 | 2.9206678219  | -1.5670897949 |
| C  | 4.2944672056 | 1.9363086285  | -0.7220401647 |
| C  | 3.0749670692 | 1.3071573528  | -1.0502984696 |
| C  | 2.4023319172 | 1.6883557172  | -2.2328934342 |
| C  | 2.9492261552 | 2.6640394967  | -3.0796285051 |
| H  | 4.5885107571 | 4.0537196969  | -3.4031988968 |

|   |               |               |               |
|---|---------------|---------------|---------------|
| H | 5.7796850269  | 3.4068905833  | -1.2984330769 |
| H | 4.8179698448  | 1.6646273033  | 0.2015300472  |
| H | 1.4381247868  | 1.2206047721  | -2.4706562979 |
| H | 2.4170698315  | 2.9506951481  | -3.993972057  |
| C | 4.1828877392  | 0.7011155765  | 4.2116302153  |
| C | 4.8344911276  | -0.1552680273 | 3.3096573233  |
| C | 4.2892866869  | -0.3882869707 | 2.0355506746  |
| C | 3.0810116237  | 0.231893035   | 1.653908937   |
| C | 2.4250208942  | 1.0813650771  | 2.5727308245  |
| C | 2.9773123923  | 1.320635742   | 3.8398287277  |
| H | 4.6087062841  | 0.8785699656  | 5.205841557   |
| H | 5.7705215811  | -0.6478933278 | 3.5975718408  |
| H | 4.7996463002  | -1.0628788492 | 1.3391121874  |
| H | 1.4694394561  | 1.5387477771  | 2.2859315581  |
| H | 2.4581435874  | 1.9816012126  | 4.5433377694  |
| C | 4.1384928482  | -4.0353138368 | -1.5037433796 |
| C | 4.8035867685  | -2.8330680271 | -1.7932533    |
| C | 4.2720880206  | -1.6074662602 | -1.3570498874 |
| C | 3.0642639302  | -1.5737846327 | -0.6288060723 |
| C | 2.3943953878  | -2.7871298027 | -0.354191715  |
| C | 2.9329130284  | -4.0099278231 | -0.7816604327 |
| H | 4.5536709276  | -4.9895905184 | -1.8477365559 |
| H | 5.7395685314  | -2.8459720735 | -2.3638415278 |
| H | 4.7931199979  | -0.6730318242 | -1.5934274719 |
| H | 1.4386387854  | -2.7566533659 | 0.1847214683  |
| H | 2.4029362621  | -4.9438897577 | -0.5619565659 |
| P | -2.2844272793 | 0.0064332569  | 0.0084781687  |
| C | -4.1892530961 | -0.6530215599 | -4.213921624  |
| C | -4.8437649595 | 0.1862300302  | -3.297906786  |
| C | -4.296376211  | 0.4044225993  | -2.0221657678 |
| C | -3.0831237398 | -0.2136168446 | -1.652835476  |
| C | -2.4243394387 | -1.0455695492 | -2.5855035736 |
| C | -2.9786572263 | -1.2699870188 | -3.8545277167 |
| H | -4.6168796174 | -0.818989641  | -5.2093608295 |
| H | -5.783749005  | 0.6768939409  | -3.5761472029 |
| H | -4.8086167072 | 1.0662214758  | -1.3148382146 |
| H | -1.4651585109 | -1.5009477284 | -2.3074511922 |
| H | -2.4572609753 | -1.9173416682 | -4.5689820612 |
| C | -4.1413939009 | 4.0131945433  | 1.5564584681  |
| C | -2.9378740215 | 3.9981990436  | 0.8307249294  |
| C | -2.3983144171 | 2.7812684333  | 0.3881112907  |
| C | -3.0650866919 | 1.5637276069  | 0.6512848401  |
| C | -4.2710240243 | 1.5869560803  | 1.3830135127  |
| C | -4.8035157418 | 2.8065640628  | 1.8343832132  |
| H | -4.5574582956 | 4.9627814765  | 1.91205127    |
| H | -2.4102959046 | 4.935556592   | 0.6200142325  |
| H | -1.4441653355 | 2.7585586976  | -0.1539274396 |
| H | -4.7897703168 | 0.6489700206  | 1.6100793214  |
| H | -5.7380919608 | 2.8114340008  | 2.4073376619  |
| C | -4.1624979218 | -3.3166793102 | 2.7153930264  |
| C | -4.8282339117 | -2.9463051168 | 1.5359193957  |
| C | -4.2894318791 | -1.9522668607 | 0.70137382    |
| C | -3.0735754517 | -1.3211528946 | 1.0389899057  |
| C | -2.4032681469 | -1.7099129586 | 2.2205199173  |
| C | -2.9489601569 | -2.6951443339 | 3.0568707191  |
| H | -4.5835560602 | -4.0943270795 | 3.3628948653  |
| H | -5.7705041241 | -3.4338643741 | 1.2599214713  |

|   |               |               |               |
|---|---------------|---------------|---------------|
| H | -4.8112961195 | -1.6743663236 | -0.2212334128 |
| H | -1.4417937866 | -1.2404093672 | 2.4657275709  |
| H | -2.4186394762 | -2.9875497744 | 3.9704617085  |

Pd(PPh<sub>3</sub>)<sub>3</sub> B3LYP-D2/BS1

|   |               |               |               |
|---|---------------|---------------|---------------|
| C | 7.1454132485  | 0.2372894217  | 5.139439432   |
| C | 8.4550614147  | 0.4656279485  | 4.7076552378  |
| C | 8.7580058648  | 0.4351662686  | 3.3437532727  |
| C | 7.7533427286  | 0.1697041036  | 2.4028492209  |
| C | 6.4454866908  | -0.0748436105 | 2.8475146722  |
| C | 6.1396690793  | -0.0316295478 | 4.2073044076  |
| H | 6.9128318527  | 0.2525852554  | 6.201220496   |
| H | 9.2409463825  | 0.6659170556  | 5.4320627158  |
| H | 9.7768592631  | 0.6070688906  | 3.006625472   |
| H | 5.6825068978  | -0.3354467479 | 2.1173535308  |
| H | 5.1280776534  | -0.2430460782 | 4.541566628   |
| C | 8.279029198   | 4.5045510759  | -0.8314960944 |
| C | 8.225296934   | 4.24372264    | 0.5401167091  |
| C | 8.1671734445  | 2.9260617285  | 1.0054163747  |
| C | 8.1556058745  | 1.855676239   | 0.0993708921  |
| C | 8.2017860308  | 2.1286782894  | -1.2771693617 |
| C | 8.2691848495  | 3.441868084   | -1.7412175138 |
| H | 8.320473658   | 5.5300240233  | -1.1900790548 |
| H | 8.2284330667  | 5.065976585   | 1.2516193393  |
| H | 8.1284847669  | 2.7294315475  | 2.0726584186  |
| H | 8.1578348856  | 1.3041708649  | -1.983308107  |
| H | 8.291134633   | 3.6331116843  | -2.8107870951 |
| C | 12.4635573584 | -1.3623433903 | 0.1899415328  |
| C | 12.2066527363 | 0.0048399217  | 0.3285935671  |
| C | 10.8938033549 | 0.4649831761  | 0.4677745924  |
| C | 9.8216118881  | -0.4395491131 | 0.472619103   |
| C | 10.091121305  | -1.8114817    | 0.3332982593  |
| C | 11.4008472683 | -2.2717292428 | 0.1931694974  |
| H | 13.4852794894 | -1.7153370197 | 0.0741327347  |
| H | 13.0286894148 | 0.7164234543  | 0.3226350314  |
| H | 10.699291855  | 1.52983815    | 0.5587190526  |
| H | 9.2657473508  | -2.5150848972 | 0.3032899894  |
| H | 11.581652162  | -3.3368156112 | 0.0715195432  |
| P | 8.0530671037  | 0.0797445936  | 0.5899317389  |
| C | 10.2619531062 | -3.0221671854 | -4.7980215822 |
| C | 9.0371890363  | -3.3155103792 | -5.4059308101 |
| C | 7.8442506404  | -2.8514329706 | -4.8451570363 |
| C | 7.8633888293  | -2.0839546694 | -3.6711632524 |
| C | 9.0993443767  | -1.7912416765 | -3.0707533142 |
| C | 10.2910906474 | -2.2577572269 | -3.627343336  |
| H | 11.1871731387 | -3.3936005192 | -5.2316722111 |
| H | 9.0092877218  | -3.9134396043 | -6.3135852721 |
| H | 6.894094496   | -3.1081947842 | -5.3041485637 |
| H | 9.1171563025  | -1.2309517297 | -2.1408048869 |
| H | 11.2331546657 | -2.0378697861 | -3.1318076937 |
| C | 5.3673198691  | 2.5285640864  | -4.9196200431 |
| C | 5.7269836532  | 1.4232407955  | -5.70072049   |
| C | 6.0101086042  | 0.2005922442  | -5.0913940559 |
| C | 5.9392717932  | 0.0722121752  | -3.6951868985 |
| C | 5.5815896403  | 1.1832234238  | -2.9210110124 |
| C | 5.2940464527  | 2.408347484   | -3.5302662526 |
| H | 5.1517227403  | 3.4817656935  | -5.3960288253 |

|    |               |               |               |
|----|---------------|---------------|---------------|
| H  | 5.7892540736  | 1.5179855952  | -6.7820136111 |
| H  | 6.2968790808  | -0.6562885759 | -5.6951999229 |
| H  | 5.5647774582  | 1.0820623617  | -1.8383194788 |
| H  | 5.0330449986  | 3.2674541318  | -2.9181907265 |
| C  | 3.0707979753  | -4.5157887784 | -4.1546816309 |
| C  | 2.8756415771  | -3.1541297742 | -4.388901905  |
| C  | 3.8678276604  | -2.2297675201 | -4.0432253184 |
| C  | 5.0618960594  | -2.6595762957 | -3.4496469816 |
| C  | 5.2429356221  | -4.0331864806 | -3.2074944708 |
| C  | 4.2621432066  | -4.9536639606 | -3.5658022294 |
| H  | 2.2982673216  | -5.2326253607 | -4.4208359713 |
| H  | 1.9530908221  | -2.8054857557 | -4.8470145112 |
| H  | 3.7144514601  | -1.1728189276 | -4.2399289533 |
| H  | 6.1518133058  | -4.3791916349 | -2.7233891537 |
| H  | 4.4143771948  | -6.0093775011 | -3.3599201415 |
| P  | 6.3380988533  | -1.4935719716 | -2.8104855589 |
| Pd | 6.7674061948  | -1.4604936215 | -0.5459992419 |
| C  | 2.2921877872  | -5.3671699913 | -0.6192919727 |
| C  | 3.3003450413  | -6.187565411  | -0.102895919  |
| C  | 4.5248335871  | -5.6356642    | 0.2798447516  |
| C  | 4.7535138515  | -4.2594665964 | 0.140194305   |
| C  | 3.7402777329  | -3.446563526  | -0.388491623  |
| C  | 2.5120011975  | -3.9949367362 | -0.7591615933 |
| H  | 1.3425226389  | -5.8001857273 | -0.9234640363 |
| H  | 3.1329533442  | -7.2569937624 | 0.0005331517  |
| H  | 5.3096946262  | -6.2751719082 | 0.6741297616  |
| H  | 3.9419400845  | -2.3886077377 | -0.5398564856 |
| H  | 1.7430552958  | -3.3584822665 | -1.1873238145 |
| C  | 6.458532265   | -3.3719048158 | 5.2241152174  |
| C  | 5.264645413   | -3.7017171528 | 4.5816302575  |
| C  | 5.2104567478  | -3.7678137983 | 3.1845951711  |
| C  | 6.3504852489  | -3.4929848647 | 2.4187776643  |
| C  | 7.5451443965  | -3.146630027  | 3.075667979   |
| C  | 7.6019259889  | -3.0968890362 | 4.4651410217  |
| H  | 6.4990461803  | -3.3203904899 | 6.3091779028  |
| H  | 4.3723751972  | -3.9171044093 | 5.16474055    |
| H  | 4.2828057351  | -4.040409698  | 2.6899383395  |
| H  | 8.4296939202  | -2.9031828234 | 2.4927095029  |
| H  | 8.52937463    | -2.8162948284 | 4.9558224192  |
| C  | 9.6177892753  | -6.5642804535 | -0.5182438213 |
| C  | 8.9259021566  | -6.7010387059 | 0.6899399727  |
| C  | 7.9341074844  | -5.7818075744 | 1.0405805377  |
| C  | 7.6168947361  | -4.7174352515 | 0.1824409474  |
| C  | 8.3206252357  | -4.5876222538 | -1.024706909  |
| C  | 9.3145510705  | -5.5033300194 | -1.3762772286 |
| H  | 10.3945364427 | -7.2772435294 | -0.7834037677 |
| H  | 9.1639955586  | -7.5206632451 | 1.3634512682  |
| H  | 7.4170891286  | -5.8752868519 | 1.9911885743  |
| H  | 8.1064685975  | -3.7465508305 | -1.6740996449 |
| H  | 9.8532997236  | -5.3723437663 | -2.3112923521 |
| P  | 6.3427501319  | -3.4411810229 | 0.578085314   |

Pd(PPh<sub>3</sub>)<sub>4</sub> B3LYP-D2/BS1

|    |               |              |               |
|----|---------------|--------------|---------------|
| Pd | 0.2652589487  | 0.2600539133 | -0.4924367586 |
| P  | 1.6573730442  | 1.6511373155 | 0.8987072613  |
| P  | -1.1248558666 | 1.6534064042 | -1.8825327087 |

|   |               |               |               |   |                |               |                |
|---|---------------|---------------|---------------|---|----------------|---------------|----------------|
| C | 2.8908798663  | 2.7378028788  | 0.0473962557  | C | 0.3796920024   | 3.9804595427  | 4.1138875987   |
| C | -0.2752228988 | 2.8986510118  | -2.9574638039 | H | 0.6216176432   | 4.1064814355  | 5.1666620276   |
| C | -2.3673093078 | 2.7320409913  | -1.0321532093 | C | 1.1063402662   | 3.0663598249  | 3.3440501421   |
| C | -3.4939421211 | 4.846405688   | -0.6196469987 | H | 1.9024454606   | 2.4890577632  | 3.803288091    |
| C | -2.5694224628 | 4.0854012868  | -1.3426220029 | C | -0.2264051624  | 3.64 72768558 | 1.417899742    |
| H | -3.6360543632 | 5.8953990716  | -0.8680299875 | H | -0.4836560313  | 3.5099806648  | 0.3762793329   |
| H | -2.0027928683 | 4.5479142842  | -2.1444801769 | C | -2.4006794156  | 1.4576835858  | 3.8362704257   |
| P | -1.1268516811 | -1.1295478179 | 0.9032530857  | H | -1.9320715212  | 2.256806012   | 4.4026856723   |
| P | 1.6563393786  | -1.1287930461 | -1.8817556166 | C | -1.639320503   | 0.7397286024  | 2.9152298354   |
| C | 0.8039622129  | 2.884202949   | 1.9863541714  | H | -0.5969159943  | 0.99369 72514 | 2.7802950439   |
| C | 2.7473614102  | 0.8029807242  | 2.132260349   | C | -3.7593379434  | 1.1665628821  | 3.9938778448   |
| C | -2.2107150772 | -0.2822149582 | 2.143523582   | H | -4.3623634545  | 1.7321344553  | 4.7000989393   |
| C | -0.2740021789 | -2.3705968592 | 1.9804461068  | C | -4.3403174553  | 0.1468527278  | 3.235350 8621  |
| C | -2.3670694428 | -2.209773889  | 0.0528870569  | H | -5.3949136115  | -0.0898317234 | 3.355723023    |
| C | 2.9057669611  | -2.2002809261 | -1.0323762028 | C | -3.5707561574  | -0.578596241  | 2.3199924552   |
| C | 2.7285048664  | -0.2766671934 | -3.1279578878 | H | -4.0322160726  | -1.3687997846 | 1.7366437254   |
| C | 0.807521196   | -2.3746871437 | -2.9574406339 | C | -4.220 7699321 | -3.7444581275 | -1.4044353299  |
| C | -3.1197868877 | 2.1594894255  | 0.0029640676  | H | -4.9289377507  | -4.3421980293 | -1.9731238112  |
| H | -2.962906764  | 1.1227804135  | 0.2675304843  | C | -4.0463409004  | -2.3892390249 | -1.7005792358  |
| C | 3.647345065   | 2.1708151048  | -0.9882013365 | H | -4.6009921001  | -1.9182363719 | -2.506395325   |
| H | 3.505624423   | 1.130295836   | -1.249111296  | C | -3.1247878779  | -1.6341937512 | -0.976925663   |
| C | 4.5641749078  | 2.9337943718  | -1.7095987162 | H | -2.9767601028  | -0.5936468162 | -1.2319422024  |
| H | 5.1191339148  | 2.4693320936  | -2.519015738  | C | -2.5597973366  | -3.5665506 83 | 0.3545981512   |
| C | 3.9909130573  | 4.86425724    | -0.3731498943 | H | -1.9875980144  | -4.0312122344 | 1.1511215291   |
| H | 4.1211837038  | 5.9156011925  | -0.1273044175 | C | -3.4782021851  | -4.3288719332 | -0.3746387225  |
| C | 3.0778845646  | 4.0938317494  | 0.3544724762  | H | -3.6124458933  | -5.380999804  | -0.13434 71732 |
| H | 2.5054338759  | 4.5513292214  | 1.1550964223  | C | 1.1863255629   | -4.2252384055 | 3.5119520741   |
| C | 4.7681656946  | -3.7262032709 | 0.4246158285  | H | 1.7565853293   | -4.9331246696 | 4.1085256541   |
| H | 5.4786063085  | -4.3207947154 | 0.9937992593  | C | 1.4763625247   | -4.0539357876 | 2.1548726266   |
| C | -0.9463567486 | -4.0535595122 | -3.1367489091 | H | 2.2786 688137  | -4.611281879  | 1.6809346207   |
| H | -1.7526703406 | -4.6074803963 | -2.6654311494 | C | -3.7414927859  | -0.6473708088 | -4.9840802356  |
| C | -0.2236072254 | -3.1306620639 | -2.3823060366 | H | -4.3403971876  | -1.2139179091 | -5.6929739588  |
| H | -0.4825535827 | -2.9793776285 | -1.3432554799 | C | -4.3258782094  | 0.3749849764  | -4.231435494   |
| C | 1.1073661594  | -2.5670348345 | -4.3146050679 | H | -5.379256992   | 0.6132096992  | -4.3593796414  |
| H | 1.9020457895  | -1.9929303122 | -4.7801112692 | C | -3.5616565111  | 1.1012461365  | -3.3121461207  |
| C | 0.3783948815  | -3.485647941  | -5.0769186834 | H | -4.0267495284  | 1.8921127526  | -2.7324675857  |
| H | 0.6186579541  | -3.6195919293 | -6.1290807065 | C | -2.3850951145  | -0.9414150288 | -4.8152443377  |
| C | -0.6502323786 | -4.2293038762 | -4.4919186876 | H | -1.9141122201  | -1.7437241181 | -5.3753936839  |
| H | -1.2189036391 | -4.9379879135 | -5.0890641914 | C | -1.6286638726  | -0.2210043256 | -3.8919710096  |
| C | 3.0886750083  | -3.5617525726 | -1.3177114927 | H | -0.5876833831  | -0.4765113684 | -3.7499442382  |
| H | 2.5047505692  | -4.033101918  | -2.1017824284 | C | 4.2522573728   | 1.1726475832  | -4.9982719262  |
| C | 4.0111307333  | -4.3196737962 | -0.5890425374 | H | 4.8455190669   | 1.7383327897  | -5.7125883857  |
| H | 4.1372232845  | -5.3754382412 | -0.8175340563 | C | 2.8953800608   | 1.4620693752  | -4.8240955509  |
| C | 4.6033243075  | -2.366368035  | 0.7055768932  | H | 2.4184020977   | 2.2599440468  | -5.3853698555  |
| H | 5.1677805962  | -1.8882599117 | 1.5005575779  | C | -2.2029935648  | 0.8041374088  | -3.1266909454  |
| C | 3.6770365726  | -1.6160308507 | -0.0171234772 | C | 0.1617129959   | -3.4781494742 | 4.0997350589   |
| H | 3.5366170124  | -0.5725738204 | 0.2300926033  | H | -0.0750771293  | -3.6100341448 | 5.1529299187   |
| C | 4.0870346673  | -0.5699488119 | -3.319113705  | C | -0.5699485416  | -2.5608762003 | 3.3385275148   |
| H | 4.5569488622  | -1.3589220925 | -2.7407665353 | H | -1.3653502167  | -1.9885344513 | 3.8050172437   |
| C | 4.8440398314  | 0.1545932186  | -4.2455064092 | C | 0.7526668282   | -3.1305979437 | 1.4019230447   |
| H | 5.8972505435  | -0.0814465924 | -4.3788876397 | H | 1.0050778631   | -2.9852735661 | 0.3599577356   |
| C | 2.1464869173  | 0.7433394829  | -3.8936016063 | C | 4.2972892786   | -0.6389241976 | 3.9862292285   |
| H | 1.10478412    | 0.9939149444  | -3.7478326142 | H | 4.9009753641   | -1.2013549942 | 4.6943388182   |
| C | 1.1733957252  | 4.7670265461  | -4.4844056666 | C | 4.8719109843   | 0.3938079305  | 3.2399237606   |
| H | 1.7386992978  | 5.4804997484  | -5.0790411649 | H | 5.9220368951   | 0.6438580024  | 3.3720861713   |
| C | 0.7457555707  | 3.664602017   | -2.3769847142 | C | 4.1017911729   | 1.1152657916  | 2.3217939383   |
| H | 0.9987252905  | 3.5185995585  | -1.3357523763 | H | 4.5588709044   | 1.9150568705  | 1.7476199609   |

|   |               |               |               |
|---|---------------|---------------|---------------|
| C | 4.7342184429  | 4.2881389443  | -1.4069262221 |
| H | 5.4382993122  | 4.8917735363  | -1.9744552581 |
| C | -0.9472717645 | 4.5650447389  | 2.1802135045  |
| H | -1.7529827963 | 5.1237347074  | 1.7137068951  |
| C | -0.648414011  | 4.7305170291  | 3.5359442042  |
| H | -1.215178385  | 5.4352237773  | 4.1395794863  |
| C | 1.4643060192  | 4.5938266197  | -3.1276746374 |
| H | 2.2632507171  | 5.1547194908  | -2.6520971955 |
| C | -4.0494726093 | 2.9118943406  | 0.7188289363  |
| H | -4.6016997655 | 2.4416232746  | 1.5268831525  |
| C | -4.2350553762 | 4.2634848039  | 0.4121186633  |
| H | -4.9486528585 | 4.8596870124  | 0.9756256515  |
| C | -0.5693628602 | 3.0884345924  | -4.3159266464 |
| H | -1.3589316494 | 2.510188271   | -4.7849974262 |
| C | 0.1546162897  | 4.0142188838  | -5.0743369654 |
| H | -0.0822885486 | 4.1467367364  | -6.1274539004 |
| C | 2.1823297397  | -0.2315990182 | 2.8912207848  |
| H | 1.1434587257  | -0.495246113  | 2.7470805174  |
| C | 2.9443517949  | -0.9468966535 | 3.8137942009  |
| H | 2.4804746513  | -1.7557612963 | 4.3703591047  |

Table SI4d

Pd(SPhos) B3LYP-D2/BS1

|    |               |               |               |
|----|---------------|---------------|---------------|
| Pd | -0.2694964132 | -1.2946808479 | -1.456052828  |
| P  | 0.8973534985  | 0.161901645   | -0.1890509786 |
| O  | -3.3549391429 | 1.1786934988  | 0.6050673647  |
| O  | -1.034107182  | -2.8685553565 | 0.9717921939  |
| C  | -1.2180468501 | -0.2022118255 | 1.7336401083  |
| C  | 0.1214858864  | 0.2134069983  | 1.5077042353  |
| C  | 0.8521028475  | 0.7124876611  | 2.5990375838  |
| H  | 1.87831067    | 1.0335097258  | 2.4578796285  |
| C  | -1.0315019694 | 0.432887968   | 4.0798014738  |
| H  | -1.483371738  | 0.5180669882  | 5.0647039465  |
| C  | -2.0548386984 | -0.76808995   | 0.6394308231  |
| C  | -1.7727071863 | -0.0728335988 | 3.012968041   |
| H  | -2.8024992026 | -0.3836570317 | 3.1615738608  |
| C  | -0.7261408648 | 2.2955514566  | -0.9343766422 |
| H  | -1.1965563222 | 1.5527812681  | -1.5925173887 |
| H  | -1.2357224462 | 2.2264297858  | 0.0343520779  |
| C  | -1.7097543038 | -2.0489351276 | 0.1019647809  |
| C  | -3.0647010063 | -0.0280580217 | 0.0260775555  |
| C  | -3.7007733317 | -0.4889922709 | -1.1498773541 |
| H  | -4.4801685885 | 0.0952126359  | -1.6233921004 |
| C  | 0.7613043316  | 1.946343352   | -0.7386507898 |
| H  | 1.2509951433  | 1.9662568243  | -1.7233520967 |
| C  | -4.1128964661 | 2.1104673952  | -0.1495376574 |
| H  | -3.6465289549 | 2.2972183349  | -1.126429918  |
| H  | -4.122464741  | 3.0329131302  | 0.4365440795  |
| H  | -5.144705961  | 1.7627271834  | -2.996267211  |
| C  | 2.7098495217  | -0.0654383404 | 0.1663970505  |
| H  | 3.0659669595  | 0.7094374706  | 0.8582691929  |
| C  | 0.292072283   | 0.8205598983  | 3.8729351586  |
| H  | 0.8880161958  | 1.2111764673  | 4.6939218454  |
| C  | -3.2953453456 | -1.6882835504 | -1.7173446861 |
| H  | -3.7734714593 | -2.0389077988 | -2.6280296327 |
| C  | 1.4475018845  | 2.9801464703  | 0.1687243329  |
| H  | 2.5142745727  | 2.7462460015  | 0.2789844228  |

|   |               |               |               |
|---|---------------|---------------|---------------|
| H | 0.9967229517  | 2.9318864486  | 1.1686582784  |
| C | -2.2958249857 | -2.4939652543 | -1.121003465  |
| H | -2.1313903747 | -3.5040269258 | -1.4781380843 |
| C | 2.9440882537  | -1.4460381664 | 0.8068714882  |
| H | 2.3872878613  | -1.5203956702 | 1.7486197881  |
| H | 2.5383434862  | -2.2127679625 | 0.1303386904  |
| C | -0.4198052139 | -4.03102097   | 0.4348601284  |
| H | -1.1672160239 | -4.7371723165 | 0.0462927257  |
| H | 0.121840597   | -4.495003959  | 1.262582375   |
| H | 0.2798142755  | -3.7527310355 | -0.3676176319 |
| C | -0.2078134142 | 4.7471349093  | -0.5858433559 |
| H | -0.7047917659 | 4.7445857401  | 0.3959912795  |
| H | -0.3139595947 | 5.7577325359  | -1.0014542605 |
| C | 1.2767036231  | 4.4022177156  | -0.3933720884 |
| H | 1.755553994   | 5.1297539616  | 0.2752407405  |
| H | 1.7895321274  | 4.4692251464  | -1.3647566175 |
| C | 3.5114360619  | 0.0754335958  | -1.1412960568 |
| H | 3.368085184   | 1.0772485373  | -1.5661075848 |
| H | 3.1194922796  | -0.6460617697 | -1.8728790771 |
| C | -0.8946647493 | 3.7155145358  | -1.4934574519 |
| H | -0.4501279383 | 3.7663152576  | -2.4990143949 |
| H | -1.9620975083 | 3.9521646427  | -1.5999530162 |
| C | 4.4401009671  | -1.7056825483 | 1.0392658502  |
| H | 4.8243807572  | -0.9778108737 | 1.769857725   |
| H | 4.5844636584  | -2.7039098076 | 1.4729142943  |
| C | 5.2328112143  | -1.5695684966 | -0.2693439214 |
| H | 6.3027609544  | -1.7366827953 | -0.0895003724 |
| H | 4.896330506   | -2.3454653046 | -0.9733235424 |
| C | 5.0072019781  | -0.1887625153 | -0.9039522922 |
| H | 5.5556245837  | -0.1077251613 | -1.8515042013 |
| H | 5.4072276343  | 0.584997066   | -0.2314209114 |

Pd(SPhos) BP86/BS1

|    |               |               |               |
|----|---------------|---------------|---------------|
| Pd | -1.136382796  | -0.4576046883 | -0.5841462519 |
| P  | -3.0960300957 | 0.510616582   | 0.0168952638  |
| O  | -3.200333807  | -4.0732727736 | 0.9201764188  |
| O  | -2.4143619489 | -1.5905604349 | -2.9970232022 |
| C  | -2.7354557293 | -2.6169015054 | -0.8753438509 |
| C  | -4.1341899965 | -2.0919215297 | -0.8057653306 |
| C  | -4.4294083379 | -0.7465101464 | -0.4189087013 |
| C  | -6.8349665171 | -1.2389484371 | -0.6078130725 |
| H  | -7.8740893758 | -0.8993634182 | -0.5280950265 |
| C  | -6.5412428257 | -2.5559842247 | -0.9912045353 |
| H  | -7.3491182115 | -3.2610195237 | -1.218370635  |
| C  | -5.2065731547 | -2.969399786  | -1.082204255  |
| H  | -4.9718306117 | -3.9982445222 | -1.3740683789 |
| C  | -1.8109629515 | -2.0579121164 | -1.8385430045 |
| C  | -2.262149352  | -3.5783869077 | 0.0382079136  |
| C  | -0.3961314131 | -2.3247549203 | -1.7104859812 |
| H  | 0.3016856914  | -2.0214034388 | -2.4966465861 |
| C  | -2.8801255512 | 2.0443025489  | 2.4507394303  |
| H  | -3.1849516384 | 2.958338729   | 1.9084928126  |
| H  | -1.7803569361 | 1.9533406936  | 2.3325160817  |
| C  | 0.0222761343  | -3.2877480973 | -0.7446713073 |
| H  | 1.0869484603  | -3.5420354231 | -0.6849861596 |
| C  | -0.8863860156 | -3.9401931056 | 0.0865316446  |
| H  | -0.5281725353 | -4.6842704434 | 0.8015624568  |

|   |               |               |               |
|---|---------------|---------------|---------------|
| C | -4.1758400581 | 1.8246559747  | -2.3034600643 |
| H | -3.3670748707 | 1.3285899308  | -2.8771104112 |
| H | -5.0236387994 | 1.1186907283  | -2.2928379002 |
| C | -3.2281946054 | 2.2012623226  | 3.9469043422  |
| H | -2.7001075568 | 3.0809951428  | 4.3621759027  |
| H | -4.3134930285 | 2.4104391235  | 4.0457543961  |
| C | -3.6674691595 | 2.0966205056  | -0.8676788789 |
| H | -4.497059266  | 2.5361624234  | -0.2720988845 |
| C | -2.7716076211 | -5.04497637   | 1.8721783495  |
| H | -2.3797443084 | -5.9567350223 | 1.3796383439  |
| H | -3.6695766334 | -5.3049773081 | 2.4533886282  |
| H | -1.9987354999 | -4.6403387015 | 2.5544576172  |
| C | -5.7842869298 | -0.3544321067 | -0.32465421   |
| H | -6.0275696642 | 0.6717497813  | -0.0220745822 |
| C | -3.5573907061 | 0.7995960596  | 1.8377944909  |
| H | -4.658411195  | 0.9463960485  | 1.8684342113  |
| C | -2.9058738708 | 4.4218627246  | -1.6287438902 |
| H | -3.6899948293 | 4.9337847825  | -1.0330916487 |
| H | -2.0401394537 | 5.1106894456  | -1.6641036961 |
| C | -2.4982100674 | 3.1129544454  | -0.9201480149 |
| H | -2.1186842154 | 3.333570761   | 0.0934162581  |
| H | -1.6558760418 | 2.6374125347  | -1.4632318083 |
| C | -4.5882337187 | 3.1290971713  | -3.0163173516 |
| H | -4.9308190019 | 2.8994753683  | -4.0436003529 |
| H | -5.4580334962 | 3.57215681    | -2.488041221  |
| C | -2.883305545  | 0.9346626444  | 4.7514171287  |
| H | -1.783930639  | 0.785447874   | 4.7414555409  |
| H | -3.1759785744 | 1.0602910382  | 5.8113798733  |
| C | -3.5660833271 | -0.3047341398 | 4.144156686   |
| H | -4.6662681334 | -0.2073363538 | 4.2513049341  |
| H | -3.2766759329 | -1.2171272829 | 4.7001215084  |
| C | -3.2093442678 | -0.4683866865 | 2.6529733076  |
| H | -2.1212855051 | -0.6623042464 | 2.5522209983  |
| H | -3.7226914642 | -1.3498991838 | 2.2271208044  |
| C | -1.5684661165 | -0.9445260331 | -3.9515613487 |
| H | -1.0320604298 | -0.0922908151 | -3.4872000839 |
| H | -2.2374120252 | -0.5785837379 | -4.7452320561 |
| H | -0.8360890121 | -1.6498821522 | -4.3913732738 |
| C | -3.4401405398 | 4.1532624503  | -3.0477029195 |
| H | -2.6160333286 | 3.7575651671  | -3.6764772951 |
| H | -3.7737390464 | 5.0963447708  | -3.5213101732 |

Pd(SPhos)<sub>2</sub> B3LYP-D2/BS1

|    |               |               |               |
|----|---------------|---------------|---------------|
| Pd | -0.7295914728 | 0.5833370613  | 0.1466056568  |
| P  | -0.1737239902 | -1.5128428538 | 0.8489069457  |
| P  | -1.4176786014 | 2.2510582735  | -1.2554646086 |
| O  | 2.8914306482  | 2.9795040784  | -1.5931311271 |
| O  | 4.1071826035  | -1.8126181232 | 2.2963766371  |
| O  | 0.4601713303  | -4.7413517807 | 2.539284602   |
| C  | 3.6121143341  | -3.0415512836 | 1.9583591912  |
| O  | -0.3470409076 | 3.6541441479  | 1.7375297279  |
| C  | 1.2994206361  | 3.3072520157  | 0.1047443748  |
| C  | 0.5796190732  | 4.2542067434  | -0.7930517732 |
| C  | -0.6415276625 | 3.9253929347  | -1.4164475426 |
| C  | 1.5340814388  | -2.2834187389 | 3.1491078571  |
| C  | -0.6607510092 | 6.1134212715  | -2.5032491105 |

|   |               |               |               |
|---|---------------|---------------|---------------|
| H | -1.1484899359 | 6.8261645102  | -3.1636579576 |
| C | 2.3038670007  | -3.3074068246 | 2.3925063504  |
| C | 0.5514607298  | 6.4329468843  | -1.8866644531 |
| H | 1.0203083481  | 7.3976438936  | -2.0634470656 |
| C | 1.1616164266  | 5.505858497   | -1.044488235  |
| H | 2.1096806002  | 5.7406022963  | -0.5690398489 |
| C | -2.2496523872 | -2.9461669036 | 2.1846737762  |
| H | -1.522741981  | -3.2753561132 | 2.9320558067  |
| H | -2.6270375435 | -1.9647033128 | 2.5072522835  |
| C | 1.1065261681  | -2.2251859339 | -0.3123537196 |
| H | 1.4942694568  | -3.1772323823 | 0.0558086727  |
| C | 0.141407204   | -0.4471069971 | 4.7557856611  |
| H | -0.4111403466 | 0.2629223539  | 5.3665087363  |
| C | 0.7938424785  | 2.9934502096  | 1.3778075037  |
| C | 1.7322709785  | -4.5538594796 | 2.0833017894  |
| C | 1.9046676089  | -2.0620807868 | 4.485399136   |
| H | 2.7431074916  | -2.6239199555 | 4.8874537485  |
| C | 0.4797948216  | -2.4850230527 | -1.6963445431 |
| H | -0.3032010322 | -3.2485753541 | -1.6219647368 |
| H | 0.0063654238  | -1.5604376362 | -2.052964086  |
| C | 2.473306284   | 2.6675348854  | -0.3244279353 |
| C | 1.4353010961  | 2.0544071885  | 2.1979082357  |
| H | 1.0185728025  | 1.7706506442  | 3.1546773377  |
| C | -2.5991006975 | -2.3582141549 | -0.2432449575 |
| H | -2.9713523421 | -1.3623865337 | 0.0323853998  |
| H | -2.1302161004 | -2.2366133733 | -1.2241206833 |
| C | 0.473551219   | -1.5432105281 | 2.5875779798  |
| C | 1.2185022509  | -1.1573332468 | 5.2912535895  |
| H | 1.5215041987  | -1.0085211803 | 6.3244345468  |
| C | -1.9717842388 | 0.4525490908  | -3.3966087908 |
| H | -3.0402671812 | 0.6961518289  | -3.3625711432 |
| H | -1.7922424813 | -0.3296206355 | -2.6450024219 |
| C | 2.5999026713  | 1.4391273692  | 1.7447207207  |
| H | 3.0689904943  | 0.674580466   | 2.3579193239  |
| C | 2.2581121012  | -1.2143173997 | -0.4380138083 |
| H | 2.7033503028  | -1.0268499526 | 0.5399309606  |
| H | 1.8352509091  | -0.255994451  | -0.7648869471 |
| C | 3.1351937073  | 1.7446383793  | 0.4947660421  |
| H | 4.0210480924  | 1.2287031926  | 0.1436240259  |
| C | -1.5603543043 | -2.78615165   | 0.8176610824  |
| H | -1.1243340561 | -3.7559409494 | 0.5349695172  |
| C | -3.5523572751 | 3.7478842283  | -0.1496943457 |
| H | -3.1554036718 | 3.4391248843  | 0.8275209366  |
| H | -3.0337702627 | 4.6709437667  | -0.4245546303 |
| C | -1.6155597099 | -0.0672290627 | -4.800998704  |
| H | -2.1989987858 | -0.971625449  | -5.0196110311 |
| H | -1.9033286578 | 0.6898580393  | -5.5453729424 |
| C | -0.2036569717 | -0.6309474084 | 3.4195468186  |
| H | -1.0013826738 | -0.0362734061 | 2.9827022142  |
| C | -3.2526777347 | 2.6280980992  | -1.1668724496 |
| H | -3.6111943164 | 2.9435131848  | -2.1596299321 |
| C | 5.284150748   | -1.3663923516 | 1.6379036455  |
| H | 6.1590184118  | -1.9606194223 | 1.9366731383  |
| H | 5.4220704763  | -0.3278276701 | 1.9483677417  |
| H | 5.1635670226  | -1.4166208399 | 0.5480419501  |
| C | 2.4332508796  | -5.5025263019 | 1.3266109813  |
| H | 1.9877748474  | -6.4578293465 | 1.0773416862  |

|   |                |                |                |
|---|----------------|----------------|----------------|
| C | 3.7354602086   | 2.0446820768   | -2.2462525517  |
| H | 4.7389847865   | 2.0203675594   | -1.7968667205  |
| H | 3.8126960203   | 2.3816113909   | -3.2832541712  |
| H | 3.3019182589   | 1.0365286301   | -2.2147134537  |
| C | -1.2395007486  | 4.8670577183   | -2.2701253894  |
| H | -2.1774072625  | 4.6166209901   | -2.75994816 41 |
| C | -0.2158633092  | -5.928894538   | 2.1610347682   |
| H | -0.2926467086  | -6.0078122699  | 1.0673440398   |
| H | -1.2149651932  | -5.851670252   | 2.5931385538   |
| H | 0.2949048945   | -6.8198285725  | 2.5523273765   |
| C | -3.4292650537  | -3.9294820281  | 2.1055509964   |
| H | -3.0484646951  | -4.9285636599  | 1.8441541706   |
| H | -3.9097606798  | -4.015 1926396 | 3.089361398    |
| C | -1.137025158   | 1.6890484717   | -3.0244190381  |
| H | -1.4117487192  | 2.5179314205   | -3.694134904   |
| C | -4.4499628147  | -3.5025466528  | 1.0410 022805  |
| H | -5.2736715554  | -4.2265685935  | 0.986355401    |
| H | -4.885531092   | -2.534222845   | 1.3298995038   |
| C | -5.5194829914  | 1.5944622322   | -0.6344319626  |
| H | -5.91 66354402 | 1.8698909052   | -1.6235232529  |
| H | -6.0272926947  | 0.6697562333   | -0.3289733966  |
| C | -4.0074347973  | 1.3474708641   | -0.7428026187  |
| H | -3.8004490839  | 0.5215862347   | -1.4288334205  |
| H | -3.6082249065  | 1.0335108015   | 0.2323140146   |
| C | -5.0630757169  | 4.0029378886   | -0.0283577083  |
| H | -5.2490435097  | 4.7974732284   | 0.7065906078   |
| H | -5.4438319742  | 4.3641557379   | -0.9959207091  |
| C | -3.7672906134  | -3.3517458935  | -0.3250918503  |
| H | -4.4902604962  | -3.0156996843  | -1.0803798174  |
| H | -3.3924618499  | -4.3344244745  | -0.6512719103  |
| C | -0.1131133558  | -0.3526374755  | -4.9372292068  |
| H | 0.1639106754   | -1.1606179256  | -4.2476019348  |
| H | 0.1175244341   | -0.6995817238  | -5.9533179523  |
| C | 4.3269671634   | -3.9808164863  | 1.2012118148   |
| H | 5.3298651662   | -3.766446459   | 0.8523114948   |
| C | 0.7088943786   | 0.8973122065   | -4.5928783463  |
| H | 0.4926964356   | 1.6880692523   | -5.3269956248  |
| H | 1.7834043444   | 0.6786858924   | -4.6624684411  |
| C | 0.3700862315   | 1.4012718619   | -3.1836347553  |
| H | 0.645851043    | 0.6350450656   | -2.4446780626  |
| H | 0.9523872109   | 2.2966289039   | -2.9423540001  |
| C | 3.3186612884   | -1.6776284804  | -1.4440171053  |
| H | 4.1168850346   | -0.9247203375  | -1.5167009268  |
| H | 3.7805320543   | -2.6078961832  | -1.0850733666  |
| C | -1.1419283141  | 3.0636848206   | 2.7555941771   |
| H | -1.391241718   | 2.0299838585   | 2.4777013213   |
| H | -2.0515433129  | 3.6664891128   | 2.8134205111   |
| H | -0.6314590116  | 3.0793330746   | 3.7292953664   |
| C | 3.7238130487   | -5.1985699944  | 0.891796845    |
| H | 4.2713053983   | -5.928528471   | 0.3018146302   |
| C | 1.5459435954   | -2.9444059076  | -2.7043827485  |
| H | 1.9629486317   | -3.906676286   | -2.3717496714  |
| H | 1.0816297711   | -3.112444015   | -3.6849662531  |
| C | -5.8189870955  | 2.7244051328   | 0.3607093729   |
| H | -5.4941305894  | 2.4088447358   | 1.3639904596   |
| H | -6.898585832   | 2.9171832223   | 0.41493563     |

|   |              |               |               |
|---|--------------|---------------|---------------|
| C | 2.6847843587 | -1.921305374  | -2.8205242884 |
| H | 2.2760119733 | -0.9747722812 | -3.2019679827 |
| H | 3.4373101625 | -2.2667968181 | -3.5417636532 |

Pd(SPhos)<sub>2</sub> BP86/BS1

|    |               |               |               |
|----|---------------|---------------|---------------|
| Pd | -0.5424975536 | 0.4799297788  | -0.3201254249 |
| P  | 0.0025937312  | -1.6010763917 | 0.5211462344  |
| P  | -1.5344433879 | 2.2371139936  | -1.4195160291 |
| O  | 2.6472384672  | 3.3234548103  | -2.3092902018 |
| O  | 3.7978840168  | -2.2117319064 | 3.0322489734  |
| O  | 0.021257453   | -5.0090890293 | 2.6646577271  |
| C  | 3.3288738935  | -3.4593047589 | 2.6947867903  |
| O  | 0.0961488154  | 3.7374589119  | 1.630246499   |
| C  | 1.3795756157  | 3.47338434    | -0.3260553204 |
| C  | 0.4226385147  | 4.3709933232  | -1.0530636719 |
| C  | -0.8500676043 | 3.9840133166  | -1.5483386961 |
| C  | 1.0601539472  | -2.4662906685 | 3.2126585048  |
| C  | -1.1984986465 | 6.279108282   | -2.3831665812 |
| H  | -1.8392988194 | 7.0064435396  | -2.895243759  |
| C  | 1.9186153101  | -3.6094413782 | 2.748384224   |
| C  | 0.0633408908  | 6.6545545013  | -1.8978303162 |
| H  | 0.4276630669  | 7.6804077572  | -2.0259072711 |
| C  | 0.8559456005  | 5.7053628169  | -1.244321342  |
| H  | 1.8426678973  | 5.9885755336  | -0.8611340086 |
| C  | -2.366366973  | -2.9104735559 | 1.506395566   |
| H  | -1.8386936836 | -3.1242776905 | 2.4504782561  |
| H  | -2.7989189997 | -1.8930776629 | 1.6019203115  |
| C  | 1.5280091222  | -2.3939907287 | -0.2669606405 |
| H  | 1.7708961119  | -3.3194230202 | 0.2880389009  |
| C  | -0.4218168771 | -0.3566985721 | 4.3978255706  |
| H  | -1.0043187361 | 0.4602665235  | 4.8403686302  |
| C  | 1.2337788052  | 3.2208039177  | 1.059945155   |
| C  | 1.3812523488  | -4.8963671402 | 2.4991216028  |
| C  | 1.0577323373  | -2.2538313774 | 4.6119561061  |
| H  | 1.6534240026  | -2.9295598151 | 5.2363092741  |
| C  | 1.2851130335  | -2.7685555077 | -1.747617502  |
| H  | 0.4890017757  | -3.5312176749 | -1.8282697375 |
| H  | 0.9297007644  | -1.8708005202 | -2.2950822345 |
| C  | 2.5587759889  | 3.0220142859  | -0.9679572801 |
| C  | 2.2256396304  | 2.5247986424  | 1.7817904941  |
| H  | 2.1070696319  | 2.3167865541  | 2.8472794634  |
| C  | -2.1350325512 | -2.6981355854 | -1.0030622713 |
| H  | -2.5563280694 | -1.6730336645 | -0.9822267722 |
| H  | -1.4477210491 | -2.7197239438 | -1.8665961917 |
| C  | 0.3039796552  | -1.5888029748 | 2.3805392056  |
| C  | 0.3221456967  | -1.2241767418 | 5.2099032578  |
| H  | 0.337257795   | -1.0997773734 | 6.2989392624  |
| C  | -2.6814619347 | 0.7655913863  | -3.6449877681 |
| H  | -3.7022113771 | 0.9837560785  | -3.280690523  |
| H  | -2.3424291603 | -0.1532923505 | -3.1250934831 |
| C  | 3.3761528516  | 2.0918262936  | 1.1119365305  |
| H  | 4.1491911429  | 1.5532214556  | 1.6712574621  |
| C  | 2.7095270664  | -1.4033332822 | -0.1499425159 |
| H  | 2.9061183089  | -1.1706147988 | 0.9115655415  |
| H  | 2.4151820957  | -0.4462940137 | -0.6270950048 |
| C  | 3.559386338   | 2.3289951013  | -0.2570483575 |
| H  | 4.4672116656  | 1.9799301511  | -0.7544967556 |

|   |               |               |               |
|---|---------------|---------------|---------------|
| C | -1.3698239185 | -2.9219000058 | 0.324006047   |
| H | -0.8662354507 | -3.9109834365 | 0.3047690055  |
| C | -3.3331111368 | 3.564434519   | 0.3801046955  |
| H | -2.7150317885 | 3.1301028003  | 1.191868781   |
| H | -2.8606838984 | 4.5250715468  | 0.1118662888  |
| C | -2.7324152293 | 0.5159283233  | -5.1682213414 |
| H | -3.4042354692 | -0.3374775674 | -5.3835595449 |
| H | -3.1796945745 | 1.4008998695  | -5.6670770081 |
| C | -0.410589863  | -0.5366375602 | 3.0083292136  |
| H | -0.9613305084 | 0.1564983769  | 2.3547578652  |
| C | -3.3148919503 | 2.5900214636  | -0.8227196458 |
| H | -3.8734567017 | 3.0543172618  | -1.664731214  |
| C | 5.2117329874  | -2.0124407216 | 3.0342713424  |
| H | 5.7191522246  | -2.6992225011 | 3.7396604376  |
| H | 5.3617441073  | -0.9740205743 | 3.3658679508  |
| H | 5.6438081792  | -2.1402903913 | 2.0230793635  |
| C | 2.2084769676  | -5.9755047979 | 2.1217199567  |
| H | 1.786863221   | -6.9607892336 | 1.910259591   |
| C | 3.8237005947  | 2.909206227   | -3.000502226  |
| H | 4.7342829921  | 3.3719808134  | -2.5708918934 |
| H | 3.6948474748  | 3.2531039173  | -4.0379482371 |
| H | 3.9373215483  | 1.8075212745  | -2.9910054432 |
| C | -1.6361181403 | 4.9605743591  | -2.2080120325 |
| H | -2.625365821  | 4.6840543637  | -2.5918738917 |
| C | -0.5491956537 | -6.3145652726 | 2.5584619273  |
| H | -0.4550567391 | -6.7227605374 | 1.5332527011  |
| H | -1.6145245869 | -6.1918531793 | 2.8028762346  |
| H | -0.0832263888 | -7.0181848191 | 3.2752995852  |
| C | -3.5092555347 | -3.9282265572 | 1.3065393251  |
| H | -3.0874010741 | -4.955043934  | 1.3188938588  |
| H | -4.2130896959 | -3.8688370735 | 2.1594211498  |
| C | -1.7223105307 | 1.9218526406  | -3.2915586038 |
| H | -2.1247784047 | 2.8559627098  | -3.735540826  |
| C | -4.2526773884 | -3.7142630113 | -0.0231336508 |
| H | -5.0363617657 | -4.4844969678 | -0.1589979431 |
| H | -4.7718764524 | -2.7342578901 | 0.0032882368  |
| C | -5.4584465895 | 1.5170508774  | 0.0870967027  |
| H | -6.0796717856 | 1.9262365904  | -0.7372207432 |
| H | -5.9197699674 | 0.5531910537  | 0.3769607608  |
| C | -4.0230958789 | 1.272000955   | -0.4226667339 |
| H | -4.0394915259 | 0.5595602818  | -1.2656172457 |
| H | -3.4138544192 | 0.7860342653  | 0.3671423635  |
| C | -4.7654532342 | 3.8127068261  | 0.8970429038  |
| H | -4.7342515258 | 4.4984353084  | 1.7660115371  |
| H | -5.3516599096 | 4.3323795177  | 0.110480156   |
| C | -3.2650321727 | -3.728908379  | -1.203192474  |
| H | -3.7937260795 | -3.5223700689 | -2.1538911895 |
| H | -2.8282571917 | -4.745067062  | -1.3022185862 |
| C | -1.3323378224 | 0.2622218618  | -5.7559179507 |
| H | -0.927392018  | -0.6821268309 | -5.3373016531 |
| H | -1.3940597968 | 0.1220144827  | -6.8524015387 |
| C | 4.1669491063  | -4.5303925807 | 2.3205370981  |
| H | 5.2503375453  | -4.4037224189 | 2.2608030809  |
| C | -0.3760246866 | 1.4179828868  | -5.4088509052 |
| H | -0.7195477297 | 2.3422760021  | -5.9184613241 |
| H | 0.6405076994  | 1.2073380664  | -5.7941339071 |
| C | -0.3184343852 | 1.6623741833  | -3.8877345567 |

|   |               |               |               |
|---|---------------|---------------|---------------|
| H | 0.1101642845  | 0.7728950025  | -3.3806883019 |
| H | 0.3576353393  | 2.5063794939  | -3.6594190341 |
| C | 3.9868533572  | -1.9483809432 | -0.8198986873 |
| H | 4.7992950755  | -1.1992018255 | -0.7409993615 |
| H | 4.3303601135  | -2.852210792  | -0.2747432358 |
| C | -0.0739439503 | 3.5551295745  | 3.0357372123  |
| H | -0.1237403806 | 2.482444971   | 3.3026276774  |
| H | -1.0291314615 | 4.0421276632  | 3.2839065682  |
| H | 0.7431575329  | 4.0369314231  | 3.6087216033  |
| C | 3.5914515535  | -5.7740783925 | 2.0287595633  |
| H | 4.2369000617  | -6.6086607607 | 1.7328134887  |
| C | 2.568556536   | -3.3094707497 | -2.4137567105 |
| H | 2.854621282   | -4.2648850709 | -1.9272824299 |
| H | 2.3656926575  | -3.5445577099 | -3.4765983993 |
| C | -5.4771755146 | 2.5002290912  | 1.2708131027  |
| H | -4.9573436027 | 2.0367352424  | 2.1347973476  |
| H | -6.5163457994 | 2.6999025343  | 1.5961760085  |
| C | 3.7377691941  | -2.316058845  | -2.2940898372 |
| H | 3.4931338363  | -1.3955172995 | -2.863515727  |
| H | 4.6527279157  | -2.7395262273 | -2.7519515714 |

Table SI4e

| PhCl/PCy <sub>3</sub> | [4] <sup>‡</sup> | B3LYP-D2/BS1                |
|-----------------------|------------------|-----------------------------|
| Pd                    | 0.96129577       | -1.986756086 -1.8953394032  |
| Cl                    | 1.9508971298     | -3.8093599817 -3.1234507634 |
| P                     | 0.2467938458     | -0.1741303573 -0.7357357312 |
| C                     | 2.979839729      | -2.1852239084 -2.8221984771 |
| C                     | 1.1461907183     | 1.3951240676 -1.1770750778  |
| C                     | 2.6637062947     | 1.170432517 -1.0307130456   |
| C                     | 0.8102966861     | 1.832731019 -2.6151524638   |
| C                     | 0.4009992752     | -0.3051322297 1.1293408259  |
| C                     | 1.4900912902     | -1.326941733 1.5188644212   |
| C                     | 0.6281278745     | 1.0250956559 1.8750417218   |
| C                     | -1.5506972021    | 0.2319786203 -1.0154621026  |
| C                     | -2.4303272897    | -1.0046020516 -0.7512756623 |
| C                     | -3.8942692187    | -0.7245797645 -1.1268182918 |
| C                     | -4.4354278512    | 0.5080151697 -0.3856823633  |
| C                     | -3.551240271     | 1.7374053905 -0.6447061573  |
| C                     | -2.0911119691    | 1.4538202646 -0.2531779622  |
| C                     | 3.9809024212     | -2.2506889401 -1.8356209381 |
| C                     | 5.0587870134     | -1.3689152371 -1.9089115412 |
| C                     | 5.178970834      | -0.4692384628 -2.974468951  |
| C                     | 4.206597351      | -0.4605663801 -3.9808029485 |
| C                     | 3.1152587468     | -1.3278799104 -3.9294813421 |
| C                     | 1.5257856901     | -1.544725685 3.0393089935   |
| C                     | 1.7280618634     | -0.2186499968 3.787700213   |
| C                     | 0.647525727      | 0.8002425338 3.3960692663   |
| C                     | 3.461019097      | 2.4216291744 -1.4276365534  |
| C                     | 3.1122093877     | 2.867067374 -2.8548321815   |
| C                     | 1.6010465754     | 3.0924829604 -3.0048166548  |
| H                     | 0.8327203536     | 2.1926865733 -0.4889640888  |
| H                     | 2.9114767888     | 0.8781227883 -0.0034464822  |
| H                     | 2.9533613134     | 0.3347135884 -1.6740774971  |
| H                     | -0.2652225653    | 2.0232684302 -2.7172250472  |
| H                     | 1.0663408791     | 1.0110835751 -3.2997185677  |
| H                     | -0.5671730446    | -0.7138734858 1.4569514682  |
| H                     | 2.4670839278     | -0.9550724082 1.1785542202  |



|                                                     |               |               |               |   |               |               |               |
|-----------------------------------------------------|---------------|---------------|---------------|---|---------------|---------------|---------------|
| H                                                   | 1.3137093101  | -2.2701476423 | 0.9873813033  | C | -3.2097600844 | 0.0888957893  | -2.5049664298 |
| H                                                   | 1.5938447211  | 1.447515387   | 1.5694898038  | C | -3.8164375147 | -0.5005539436 | -3.7882908371 |
| H                                                   | -0.1394826222 | 1.7581752568  | 1.6083737979  | C | -2.8180163955 | -1.4321057016 | -4.4887432739 |
| H                                                   | -1.6103288208 | 0.4451628077  | -2.0920651937 | C | -3.8161399582 | 2.5391810749  | 2.444359978   |
| H                                                   | -2.0371869015 | -1.8599768271 | -1.3160104826 | C | -2.725226966  | 1.597804779   | 1.9114334826  |
| H                                                   | -2.3779672322 | -1.2685678944 | 0.3155848554  | C | -3.2895115558 | 0.68542177    | 0.8023256033  |
| H                                                   | -4.5130666193 | -1.6045463563 | -0.9092854261 | C | -4.5211455174 | -0.09458446   | 1.2940561013  |
| H                                                   | -3.9533191278 | -0.5466374602 | -2.2108896206 | C | -5.6046432484 | 0.868122661   | 1.8066831933  |
| H                                                   | -5.4710739366 | 0.7116498732  | -0.6866252874 | C | -5.0496482953 | 1.7608039423  | 2.9266697407  |
| H                                                   | -4.4470361619 | 0.3000184256  | 0.6950045894  | C | -1.6716452795 | -1.851498269  | 1.035498679   |
| H                                                   | -3.9284721176 | 2.6057042274  | -0.0888242818 | C | -2.7239134338 | -2.9778293427 | 0.966235994   |
| H                                                   | -3.5916987312 | 1.9936731867  | -1.7137867622 | C | -0.7565462656 | 2.7222231136  | -1.0279629962 |
| H                                                   | -2.0485839248 | 1.2506793166  | 0.8255127648  | C | 0.1403597341  | 3.4720821893  | -0.2377308599 |
| H                                                   | -1.4653444935 | 2.3345188412  | -0.4445241399 | C | -2.0966638105 | 3.1396016335  | -1.1593983161 |
| H                                                   | 3.8865593682  | -2.9591032877 | -1.0202685789 | C | -0.3612239254 | 4.4879571098  | 0.5897617804  |
| H                                                   | 5.814126823   | -1.3926535341 | -1.1274851332 | C | -1.7086515864 | 4.838491181   | 0.541974018   |
| H                                                   | 6.0263333188  | 0.2076582991  | -3.0274244421 | C | -1.8712941572 | -3.8935327712 | 3.17466929    |
| H                                                   | 4.297660454   | 0.2237413761  | -4.820330444  | C | -0.8516749468 | -2.7481577004 | 3.2546747191  |
| H                                                   | 2.3641436362  | -1.3360898518 | -4.7112238023 | C | -1.3547157456 | -1.5065369015 | 2.5023979285  |
| H                                                   | 0.5726208837  | -1.9937500773 | 3.3575113961  | C | -2.5607160254 | 4.1761449025  | -0.3594291792 |
| H                                                   | 2.3201620639  | -2.2565883713 | 3.2986577867  | C | -2.2155218801 | -4.2223360741 | 1.71498288    |
| H                                                   | 2.7153298475  | 0.1924773785  | 3.5280051852  | H | 3.5600630605  | -2.8372189087 | -3.4304010333 |
| H                                                   | 1.7219705808  | -0.3851156691 | 4.8725923214  | H | 2.3662761845  | -2.1864239946 | -4.5615906886 |
| H                                                   | 0.8140838859  | 1.7542527909  | 3.9132356179  | H | 2.9803422118  | -0.483084906  | -2.8427065527 |
| H                                                   | -0.3359762845 | 0.4250745641  | 3.7167706958  | H | 1.2785088853  | -0.902987339  | -2.723805042  |
| H                                                   | 4.5351624796  | 2.2111444787  | -1.3470021552 | H | 3.4979174548  | -2.0202553251 | -0.9333520446 |
| H                                                   | 3.2336873185  | 3.2395703819  | -0.7269440217 | H | 1.6596292521  | -3.1737483087 | 0.2854802003  |
| H                                                   | 3.662562245   | 3.7801974543  | -3.1171532614 | H | 0.4986200487  | -2.5251319626 | -0.8800707901 |
| H                                                   | 3.4265389137  | 2.080371293   | -3.5535653552 | H | 1.0697158072  | -4.8790309088 | -1.4316643928 |
| H                                                   | 1.2923812497  | 3.9248068579  | -2.3542050498 | H | 2.7817726949  | -4.4496747531 | -1.5487111423 |
| H                                                   | 1.3568427027  | 3.3816716907  | -4.0354495143 | H | 0.537402012   | -3.3369572047 | -3.3174548886 |
| PhCl/PCy <sub>3</sub> [6] <sup>‡</sup> B3LYP-D2/BS1 |               |               |               | H | 1.7575968388  | -4.5143368263 | -3.8242269272 |
| Pd                                                  | 0.0099271992  | 0.844917633   | -0.5173462788 | H | 5.4932811671  | 1.7545790967  | -2.2978586304 |
| P                                                   | 2.098712156   | -0.1952808911 | -0.0548946085 | H | 6.8480466543  | 0.8852736994  | -1.5672945513 |
| C                                                   | 2.5173550996  | -2.495979399  | -3.5194862166 | H | 4.7803528554  | -0.4917383637 | -1.5850409105 |
| C                                                   | 2.2939595267  | -1.2980112431 | -2.584359578  | H | 5.3019554507  | -0.1820187132 | 0.0720554335  |
| C                                                   | 2.4622351772  | -1.6948676639 | -1.1027935364 | H | 3.1645718799  | 1.4217909046  | -1.4191647779 |
| C                                                   | 1.530004093   | -2.8680195732 | -0.7604619193 | H | 2.7784230667  | 2.4960354702  | 0.8370902043  |
| C                                                   | 1.7605544112  | -4.066529385  | -1.6936984863 | H | 4.1768051555  | 1.6098251445  | 1.4491046935  |
| C                                                   | 1.5780480838  | -3.6571343252 | -3.1625640352 | H | 4.8272617114  | 3.920889677   | 0.760466366   |
| C                                                   | 5.8788618377  | 1.3527895238  | -1.3491147021 | H | 4.2548280556  | 3.5914857605  | -0.8816101453 |
| C                                                   | 4.8918320732  | 0.2918330205  | -0.8292357016 | H | 6.5236852104  | 2.1195746385  | 0.5659826287  |
| C                                                   | 3.5308534992  | 0.9400043842  | -0.4999434343 | H | 6.728016466   | 3.2682594938  | -0.7628724745 |
| C                                                   | 3.7374316921  | 2.0530158035  | 0.5453645733  | H | 1.1044134925  | -1.1408274424 | 4.1659096166  |
| C                                                   | 4.6967080888  | 3.1278711449  | 0.0125876568  | H | 1.5926902383  | 0.4016077191  | 4.8791798156  |
| C                                                   | 6.0535581421  | 2.5066614461  | -0.3509506217 | H | 0.9406677812  | 0.6864164075  | 2.4584891352  |
| C                                                   | 1.8750394351  | -0.3590933333 | 4.1395088927  | H | 2.6312198207  | 1.0880788769  | 2.7347587352  |
| C                                                   | 1.9133642268  | 0.2610647256  | 2.734439079   | H | 1.5883989889  | -1.6055181309 | 1.7644466455  |
| C                                                   | 2.3318913362  | -0.7970457946 | 1.6920079718  | H | 4.0003236981  | -2.1470222718 | 1.3032961051  |
| C                                                   | 3.7039037821  | -1.3948581669 | 2.0454407442  | H | 4.4594241721  | -0.5980990662 | 2.0187700113  |
| C                                                   | 3.6706728777  | -2.0137446784 | 3.453413529   | H | 4.6547927797  | -2.4273901906 | 3.7098608134  |
| C                                                   | 3.234093848   | -0.9795413198 | 4.5030613039  | H | 2.9568288368  | -2.8514309969 | 3.4548810868  |
| P                                                   | -1.9426909554 | -0.3129401032 | -0.0095764698 | H | 3.9900130805  | -0.1811767593 | 4.5519540703  |
| C                                                   | -2.3692940574 | -2.5507014562 | -3.5387025563 | H | 3.1896239322  | -1.4427382549 | 5.4972156895  |
| C                                                   | -1.7814736064 | -1.9705844481 | -2.2441805685 | H | -3.2338191963 | -3.1855499232 | -3.2917583139 |
| C                                                   | -2.767813431  | -1.0212249628 | -1.5330986286 | H | -1.6248694573 | -3.1948698118 | -4.0257148063 |
|                                                     |               |               |               | H | -1.4834116553 | -2.7881042182 | -1.5776199456 |

|    |               |               |               |
|----|---------------|---------------|---------------|
| H  | -0.8721568736 | -1.4005008399 | -2.4780738041 |
| H  | -3.6589380288 | -1.5914045571 | -1.2332912722 |
| H  | -3.9395109037 | 0.7495898261  | -2.0214707223 |
| H  | -2.3325468477 | 0.6941842775  | -2.766920154  |
| H  | -4.1187570363 | 0.3117215229  | -4.461722661  |
| H  | -4.7244903598 | -1.0686141504 | -3.5347526483 |
| H  | -1.9385773188 | -0.8462937404 | -4.7939172029 |
| H  | -3.2608552492 | -1.8563443372 | -5.3991324005 |
| H  | -4.1128531004 | 3.2212037533  | 1.6362708323  |
| H  | -3.4105616641 | 3.160211093   | 3.2537098943  |
| H  | -1.8847161297 | 2.1763829731  | 1.5161523577  |
| H  | -2.3431104073 | 0.9852292466  | 2.7373820599  |
| H  | -3.6166427369 | 1.3589371448  | -0.0015735084 |
| H  | -4.9180603676 | -0.7339616578 | 0.4950894467  |
| H  | -4.2232588003 | -0.7546569067 | 2.1185443094  |
| H  | -6.4765268061 | 0.3022006154  | 2.1607887527  |
| H  | -5.9452336821 | 1.5022329445  | 0.9742207638  |
| H  | -4.7666580793 | 1.1250758397  | 3.7797276383  |
| H  | -5.8242769103 | 2.4525052264  | 3.2827194779  |
| H  | -0.7464885436 | -2.2607669929 | 0.6142876165  |
| H  | -3.6649465868 | -2.6436386743 | 1.4171043694  |
| H  | -2.9428725837 | -3.2431275012 | -0.0728258965 |
| H  | 1.2070805712  | 3.2886800886  | -0.3025968122 |
| H  | -2.7589107514 | 2.6257594974  | -1.8435537866 |
| H  | 0.3257553579  | 5.0359151003  | 1.2307737028  |
| H  | -2.0906748335 | 5.6439916704  | 1.1622072443  |
| H  | -2.7899180749 | -3.5882175402 | 3.6980390537  |
| H  | -1.4879836422 | -4.7845822693 | 3.6884167963  |
| H  | -0.6428028996 | -2.4958109982 | 4.3023646123  |
| H  | 0.0996559437  | -3.0752832176 | 2.8075558887  |
| H  | -0.6126245636 | -0.7032681222 | 2.544343402   |
| H  | -2.2630620587 | -1.1381938585 | 2.9960713022  |
| H  | -3.6074827643 | 4.4640739749  | -0.4246498144 |
| H  | -1.312744566  | -4.596984667  | 1.2084932752  |
| H  | -2.9665530868 | -5.0217582971 | 1.66953885    |
| Cl | 0.1808870711  | 2.1057143054  | -2.8264740605 |
